# Supplementary material for: Developmental Constraints on Vertebrate Genome Evolution
Source: PLoS Genet. 2008 Dec 19;4(12):e1000311. doi: 10.1371/journal.pgen.1000311 (PMC2600815; doi:10.1371/journal.pgen.1000311)
Supplement: Dataset S2 — Details and characteristics of mouse gene sets used in this study. FSGD: Fish Specific whole Genome Duplication. (1.51 MB XLS) [file pgen.1000311.s008.xls]

## Sheet: 2R_dup
Ensembl_gene_id	Homolens_gene_id	Homolens_family_id
ENSMUSG00000043542	MOUSE3_8_PE3	HBG025571
ENSMUSG00000019815	MOUSE10_14_PE2	HBG025571
ENSMUSG00000033149	MOUSE16_48_PE16	HBG047975
ENSMUSG00000048537	MOUSE9_46_PE45	HBG047975
ENSMUSG00000022360	MOUSE15_61_PE5	HBG079277
ENSMUSG00000020631	MOUSE12_6_PE1	HBG079277
ENSMUSG00000029678	MOUSE6_27_PE1	HBG037813
ENSMUSG00000029682	MOUSE6_26_PE12	HBG037813
ENSMUSG00000029679	MOUSE6_26_PE10	HBG037813
ENSMUSG00000036572	MOUSEX_35_PE1	HBG089001
ENSMUSG00000038398	MOUSE8_14_PE35	HBG089001
ENSMUSG00000042359	MOUSE2_77_PE9	HBG068272
ENSMUSG00000029822	MOUSE6_51_PE2	HBG068272
ENSMUSG00000020435	MOUSE11_4_PE42	HBG068272
ENSMUSG00000024687	MOUSE19_13_PE7	HBG068272
ENSMUSG00000039050	MOUSE2_183_PE1	HBG068272
ENSMUSG00000044252	MOUSE18_14_PE4	HBG068272
ENSMUSG00000027010	MOUSE2_72_PE11	HBG001751
ENSMUSG00000015112	MOUSE6_7_PE3	HBG001751
ENSMUSG00000033059	MOUSE2_152_PE15	HBG056828
ENSMUSG00000021069	MOUSE12_73_PE17	HBG056828
ENSMUSG00000025266	MOUSEX_147_PE3	HBG023603
ENSMUSG00000042354	MOUSE14_31_PE13	HBG023603
ENSMUSG00000024008	MOUSE17_31_PE13	HBG053556
ENSMUSG00000030270	MOUSE6_113_PE11	HBG053556
ENSMUSG00000074643	MOUSE2_158_PE9	HBG053556
ENSMUSG00000034361	MOUSE8_99_PE17	HBG053556
ENSMUSG00000032179	MOUSE9_79_PE8	HBG060060
ENSMUSG00000002384	MOUSE4_126_PE11	HBG060060
ENSMUSG00000032726	MOUSE4_126_PE21	HBG060060
ENSMUSG00000039239	MOUSE1_192_PE3	HBG060060
ENSMUSG00000021253	MOUSE12_90_PE9	HBG060060
ENSMUSG00000032412	MOUSE9_100_PE2	HBG049249
ENSMUSG00000026576	MOUSE1_170_PE16	HBG049249
ENSMUSG00000063142	MOUSE14_23_PE1	HBG023051
ENSMUSG00000031576	MOUSE8_28_PE15	HBG023051
ENSMUSG00000040648	MOUSE1_102_PE2	HBG032722
ENSMUSG00000033526	MOUSE2_123_PE1	HBG032722
ENSMUSG00000034848	MOUSE2_66_PE12	HBG027289
ENSMUSG00000032514	MOUSE9_124_PE11	HBG027289
ENSMUSG00000047888	MOUSE15_84_PE5	HBG058775
ENSMUSG00000052707	MOUSE7_127_PE1	HBG058775
ENSMUSG00000026918	MOUSE2_28_PE21	HBG095071
ENSMUSG00000024335	MOUSE17_36_PE33	HBG095071
ENSMUSG00000020074	MOUSE10_65_PE3	HBG025323
ENSMUSG00000033712	MOUSE14_70_PE20	HBG025323
ENSMUSG00000063801	MOUSE7_82_PE24	HBG058462
ENSMUSG00000074154	MOUSE8_99_PE13	HBG058462
ENSMUSG00000057469	MOUSE12_17_PE6	HBG067552
ENSMUSG00000016477	MOUSE13_32_PE1	HBG067552
ENSMUSG00000019944	MOUSE10_71_PE1	HBG056731
ENSMUSG00000022075	MOUSE14_70_PE16	HBG056731
ENSMUSG00000028104	MOUSE3_99_PE43	HBG038341
ENSMUSG00000035834	MOUSE13_85_PE4	HBG038341
ENSMUSG00000024065	MOUSE17_77_PE2	HBG040359
ENSMUSG00000027293	MOUSE2_121_PE25	HBG040359
ENSMUSG00000028456	MOUSE4_44_PE26	HBG056386
ENSMUSG00000062151	MOUSE9_77_PE2	HBG056386
ENSMUSG00000033342	MOUSE3_121_PE1	HBG028971
ENSMUSG00000044667	MOUSE3_120_PE15	HBG028971
ENSMUSG00000020993	MOUSE12_62_PE4	HBG052249
ENSMUSG00000002043	MOUSE7_19_PE47	HBG052249
ENSMUSG00000030058	MOUSE6_87_PE14	HBG056357
ENSMUSG00000025607	MOUSE6_32_PE19	HBG056357
ENSMUSG00000031142	MOUSEX_7_PE11	HBG023678
ENSMUSG00000026407	MOUSE1_140_PE26	HBG023678
ENSMUSG00000034656	MOUSE8_89_PE11	HBG023678
ENSMUSG00000004110	MOUSE1_159_PE2	HBG023678
ENSMUSG00000010067	MOUSE9_112_PE5	HBG069343
ENSMUSG00000026430	MOUSE1_136_PE4	HBG069343
ENSMUSG00000038602	MOUSE10_55_PE1	HBG037771
ENSMUSG00000042195	MOUSE9_56_PE7	HBG037771
ENSMUSG00000029229	MOUSE5_78_PE5	HBG047161
ENSMUSG00000031327	MOUSEX_100_PE11	HBG047161
ENSMUSG00000022674	MOUSE16_16_PE3	HBG006512
ENSMUSG00000068964	MOUSE6_100_PE3	HBG006512
ENSMUSG00000060811	MOUSE16_20_PE7	HBG006512
ENSMUSG00000072978	MOUSE5_45_PE1	HBG006512
ENSMUSG00000074588	MOUSE3_63_PE4	HBG006512
ENSMUSG00000027694	MOUSE2_170_PE1	HBG006512
ENSMUSG00000039361	MOUSE7_93_PE10	HBG026002
ENSMUSG00000033419	MOUSE9_90_PE13	HBG026002
ENSMUSG00000026608	MOUSE1_195_PE1	HBG046844
ENSMUSG00000003759	MOUSE7_28_PE11	HBG046844
ENSMUSG00000025955	MOUSE1_67_PE10	HBG014402
ENSMUSG00000021210	MOUSE13_5_PE7	HBG014402
ENSMUSG00000054757	MOUSE13_5_PE8	HBG014402
ENSMUSG00000021207	MOUSE13_5_PE10	HBG014402
ENSMUSG00000021214	MOUSE13_5_PE2	HBG014402
ENSMUSG00000033715	MOUSE13_5_PE1	HBG014402
ENSMUSG00000071551	MOUSE13_5_PE4	HBG014402
ENSMUSG00000021211	MOUSE13_5_PE5	HBG014402
ENSMUSG00000021213	MOUSE13_5_PE3	HBG014402
ENSMUSG00000038641	MOUSE6_39_PE5	HBG014402
ENSMUSG00000046828	MOUSE1_46_PE14	HBG037299
ENSMUSG00000025956	MOUSE1_66_PE14	HBG037299
ENSMUSG00000029235	MOUSE5_80_PE11	HBG002643
ENSMUSG00000047299	MOUSE3_107_PE23	HBG002643
ENSMUSG00000026078	MOUSE1_41_PE6	HBG002643
ENSMUSG00000024924	MOUSE19_28_PE2	HBG059288
ENSMUSG00000032193	MOUSE9_22_PE44	HBG059288
ENSMUSG00000025481	MOUSE7_145_PE17	HBG029911
ENSMUSG00000061808	MOUSE18_22_PE5	HBG029911
ENSMUSG00000058230	MOUSE7_16_PE28	HBG003599
ENSMUSG00000035133	MOUSE12_54_PE12	HBG003599
ENSMUSG00000027958	MOUSE3_120_PE7	HBG064601
ENSMUSG00000038212	MOUSE13_68_PE3	HBG064601
ENSMUSG00000026839	MOUSE2_59_PE5	HBG052008
ENSMUSG00000020407	MOUSE11_10_PE4	HBG052008
ENSMUSG00000030268	MOUSE6_145_PE3	HBG002769
ENSMUSG00000030826	MOUSE7_46_PE81	HBG002769
ENSMUSG00000054958	MOUSE4_126_PE15	HBG024840
ENSMUSG00000020622	MOUSE12_11_PE2	HBG024840
ENSMUSG00000010461	MOUSE10_24_PE2	HBG022740
ENSMUSG00000025932	MOUSE1_15_PE6	HBG022740
ENSMUSG00000057367	MOUSE9_8_PE17	HBG047889
ENSMUSG00000032000	MOUSE9_8_PE19	HBG047889
ENSMUSG00000025860	MOUSEX_39_PE12	HBG047889
ENSMUSG00000002058	MOUSE11_81_PE47	HBG003862
ENSMUSG00000046562	MOUSE5_119_PE14	HBG003862
ENSMUSG00000022297	MOUSE15_41_PE1	HBG072021
ENSMUSG00000007989	MOUSE14_66_PE1	HBG072021
ENSMUSG00000045005	MOUSE1_67_PE3	HBG072021
ENSMUSG00000036904	MOUSE18_10_PE1	HBG072021
ENSMUSG00000035342	MOUSE19_46_PE14	HBG022825
ENSMUSG00000036306	MOUSE8_73_PE8	HBG022825
ENSMUSG00000025202	MOUSE19_45_PE18	HBG002281
ENSMUSG00000037071	MOUSE19_45_PE21	HBG002281
ENSMUSG00000025203	MOUSE19_45_PE19	HBG002281
ENSMUSG00000050195	MOUSE19_45_PE20	HBG002281
ENSMUSG00000070662	MOUSE5_104_PE1	HBG002281
ENSMUSG00000016386	MOUSE2_108_PE1	HBG022791
ENSMUSG00000041708	MOUSE15_87_PE12	HBG022791
ENSMUSG00000022843	MOUSE16_21_PE35	HBG001394
ENSMUSG00000029862	MOUSE6_44_PE8	HBG001394
ENSMUSG00000028555	MOUSE4_112_PE8	HBG000273
ENSMUSG00000038172	MOUSE4_85_PE3	HBG000273
ENSMUSG00000035161	MOUSE14_63_PE7	HBG043071
ENSMUSG00000035967	MOUSEX_54_PE5	HBG043071
ENSMUSG00000026484	MOUSE1_156_PE6	HBG012296
ENSMUSG00000024325	MOUSE17_36_PE23	HBG012296
ENSMUSG00000034412	MOUSE11_5_PE8	HBG050057
ENSMUSG00000042492	MOUSE7_131_PE23	HBG050057
ENSMUSG00000046032	MOUSEX_98_PE5	HBG019877
ENSMUSG00000019804	MOUSE10_44_PE2	HBG019877
ENSMUSG00000017686	MOUSE11_83_PE14	HBG032447
ENSMUSG00000025733	MOUSE17_27_PE42	HBG032447
ENSMUSG00000021131	MOUSE12_84_PE6	HBG010515
ENSMUSG00000037910	MOUSE3_50_PE1	HBG010515
ENSMUSG00000030588	MOUSE7_30_PE17	HBG033429
ENSMUSG00000024875	MOUSE19_6_PE7	HBG033429
ENSMUSG00000031601	MOUSE8_43_PE1	HBG060988
ENSMUSG00000020515	MOUSE11_60_PE8	HBG060988
ENSMUSG00000057530	MOUSE4_141_PE18	HBG024267
ENSMUSG00000022842	MOUSE16_21_PE27	HBG024267
ENSMUSG00000027820	MOUSE3_65_PE3	HBG024267
ENSMUSG00000058183	MOUSE4_158_PE9	HBG024267
ENSMUSG00000031731	MOUSE8_115_PE5	HBG026532
ENSMUSG00000040701	MOUSE14_55_PE45	HBG026532
ENSMUSG00000039652	MOUSE19_38_PE6	HBG064054
ENSMUSG00000039782	MOUSE5_45_PE3	HBG064054
ENSMUSG00000030987	MOUSE7_106_PE1	HBG024722
ENSMUSG00000039156	MOUSE5_56_PE6	HBG024722
ENSMUSG00000027479	MOUSE2_155_PE22	HBG034270
ENSMUSG00000024277	MOUSE18_25_PE5	HBG034270
ENSMUSG00000038371	MOUSE7_114_PE1	HBG058623
ENSMUSG00000036529	MOUSE15_93_PE3	HBG058623
ENSMUSG00000015340	MOUSEX_9_PE14	HBG046022
ENSMUSG00000023802	MOUSE17_4_PE8	HBG046022
ENSMUSG00000037016	MOUSE3_55_PE4	HBG061539
ENSMUSG00000042353	MOUSE8_85_PE3	HBG061539
ENSMUSG00000023961	MOUSE17_46_PE6	HBG021545
ENSMUSG00000023960	MOUSE17_46_PE4	HBG021545
ENSMUSG00000067809	MOUSE1_16_PE3	HBG082250
ENSMUSG00000074184	MOUSE7_35_PE3	HBG082250
ENSMUSG00000058164	MOUSE4_12_PE3	HBG082250
ENSMUSG00000075252	MOUSE2_81_PE12	HBG082250
ENSMUSG00000049380	MOUSE5_25_PE9	HBG082250
ENSMUSG00000004661	MOUSE9_60_PE20	HBG053267
ENSMUSG00000019564	MOUSE10_83_PE5	HBG053267
ENSMUSG00000027680	MOUSE3_36_PE3	HBG021322
ENSMUSG00000000838	MOUSEX_66_PE3	HBG021322
ENSMUSG00000064302	MOUSE1_123_PE4	HBG000861
ENSMUSG00000033392	MOUSE9_118_PE4	HBG000861
ENSMUSG00000035582	MOUSE7_101_PE14	HBG044903
ENSMUSG00000035314	MOUSE7_103_PE1	HBG044903
ENSMUSG00000057604	MOUSE6_112_PE2	HBG088435
ENSMUSG00000068088	MOUSEX_33_PE3	HBG088435
ENSMUSG00000068112	MOUSEX_24_PE4	HBG088435
ENSMUSG00000068113	MOUSEX_24_PE3	HBG088435
ENSMUSG00000029552	MOUSE6_18_PE2	HBG088435
ENSMUSG00000030020	MOUSE6_92_PE1	HBG088435
ENSMUSG00000031145	MOUSEX_7_PE14	HBG088435
ENSMUSG00000028226	MOUSE4_19_PE1	HBG059604
ENSMUSG00000031790	MOUSE8_100_PE14	HBG059604
ENSMUSG00000031740	MOUSE8_97_PE4	HBG059604
ENSMUSG00000017737	MOUSE2_167_PE21	HBG059604
ENSMUSG00000023903	MOUSE17_25_PE8	HBG059604
ENSMUSG00000029436	MOUSE5_134_PE10	HBG059604
ENSMUSG00000026594	MOUSE1_162_PE2	HBG019845
ENSMUSG00000038831	MOUSE2_34_PE20	HBG019845
ENSMUSG00000034902	MOUSE10_84_PE30	HBG058382
ENSMUSG00000028126	MOUSE3_98_PE11	HBG058382
ENSMUSG00000042042	MOUSE6_118_PE11	HBG046694
ENSMUSG00000036356	MOUSE8_73_PE1	HBG046694
ENSMUSG00000046794	MOUSE8_37_PE6	HBG071969
ENSMUSG00000067279	MOUSE19_37_PE11	HBG071969
ENSMUSG00000042700	MOUSE12_86_PE1	HBG089046
ENSMUSG00000030583	MOUSE7_30_PE24	HBG089046
ENSMUSG00000026457	MOUSE1_139_PE12	HBG047591
ENSMUSG00000030168	MOUSE6_119_PE6	HBG047591
ENSMUSG00000062580	MOUSE1_140_PE5	HBG004207
ENSMUSG00000031158	MOUSEX_8_PE9	HBG004207
ENSMUSG00000045994	MOUSE9_28_PE2	HBG059678
ENSMUSG00000071649	MOUSE19_10_PE7	HBG059678
ENSMUSG00000053626	MOUSE8_68_PE2	HBG025318
ENSMUSG00000025013	MOUSE19_42_PE13	HBG025318
ENSMUSG00000005583	MOUSE13_87_PE1	HBG071915
ENSMUSG00000001419	MOUSE3_91_PE21	HBG071915
ENSMUSG00000021771	MOUSE14_21_PE11	HBG067721
ENSMUSG00000008892	MOUSE8_24_PE17	HBG067721
ENSMUSG00000075053	MOUSE13_19_PE6	HBG067721
ENSMUSG00000075049	MOUSE13_19_PE10	HBG067721
ENSMUSG00000041737	MOUSE9_33_PE13	HBG021738
ENSMUSG00000022754	MOUSE16_59_PE18	HBG021738
ENSMUSG00000022456	MOUSE15_85_PE41	HBG068544
ENSMUSG00000022542	MOUSE16_5_PE29	HBG068544
ENSMUSG00000029992	MOUSE6_86_PE11	HBG003886
ENSMUSG00000020363	MOUSE11_52_PE5	HBG003886
ENSMUSG00000026047	MOUSE1_46_PE9	HBG004358
ENSMUSG00000034487	MOUSE9_55_PE7	HBG004358
ENSMUSG00000032624	MOUSE17_87_PE2	HBG060917
ENSMUSG00000040811	MOUSE7_19_PE29	HBG060917
ENSMUSG00000035946	MOUSE5_78_PE6	HBG059568
ENSMUSG00000053129	MOUSE5_153_PE3	HBG059568
ENSMUSG00000060890	MOUSEX_97_PE8	HBG011185
ENSMUSG00000060216	MOUSE11_73_PE56	HBG011185
ENSMUSG00000046618	MOUSE2_40_PE6	HBG061116
ENSMUSG00000038463	MOUSE1_176_PE12	HBG061116
ENSMUSG00000031918	MOUSE9_14_PE4	HBG022934
ENSMUSG00000031337	MOUSEX_69_PE5	HBG022934
ENSMUSG00000021987	MOUSE14_61_PE2	HBG022934
ENSMUSG00000039431	MOUSE8_43_PE4	HBG022934
ENSMUSG00000014496	MOUSE14_32_PE1	HBG076600
ENSMUSG00000052331	MOUSE1_57_PE4	HBG076600
ENSMUSG00000026662	MOUSE2_5_PE7	HBG079004
ENSMUSG00000049091	MOUSE7_131_PE30	HBG079004
ENSMUSG00000055782	MOUSE15_94_PE12	HBG044661
ENSMUSG00000031378	MOUSEX_71_PE28	HBG044661
ENSMUSG00000027506	MOUSE3_9_PE10	HBG053212
ENSMUSG00000000827	MOUSE2_184_PE27	HBG053212
ENSMUSG00000024815	MOUSE19_31_PE3	HBG053212
ENSMUSG00000020963	MOUSE12_95_PE5	HBG000310
ENSMUSG00000032937	MOUSE17_93_PE1	HBG000310
ENSMUSG00000031246	MOUSEX_106_PE5	HBG082334
ENSMUSG00000032261	MOUSE9_87_PE4	HBG082334
ENSMUSG00000047022	MOUSE12_60_PE2	HBG059348
ENSMUSG00000031432	MOUSEX_136_PE11	HBG059348
ENSMUSG00000025742	MOUSEX_163_PE9	HBG059348
ENSMUSG00000038732	MOUSE13_32_PE2	HBG030094
ENSMUSG00000020646	MOUSE12_26_PE9	HBG030094
ENSMUSG00000031772	MOUSE8_118_PE1	HBG079361
ENSMUSG00000074850	MOUSE13_67_PE15	HBG079361
ENSMUSG00000033063	MOUSE13_67_PE16	HBG079361
ENSMUSG00000039419	MOUSE6_47_PE1	HBG079361
ENSMUSG00000021303	MOUSE13_15_PE1	HBG009110
ENSMUSG00000036402	MOUSE6_67_PE7	HBG009110
ENSMUSG00000020376	MOUSE11_52_PE12	HBG047185
ENSMUSG00000051956	MOUSE6_25_PE8	HBG047185
ENSMUSG00000031438	MOUSEX_135_PE9	HBG047185
ENSMUSG00000036503	MOUSE3_60_PE3	HBG047185
ENSMUSG00000040746	MOUSE11_73_PE75	HBG047185
ENSMUSG00000032599	MOUSE9_113_PE16	HBG089794
ENSMUSG00000024210	MOUSE17_29_PE4	HBG089794
ENSMUSG00000031823	MOUSE8_125_PE26	HBG037325
ENSMUSG00000025786	MOUSE9_127_PE13	HBG037325
ENSMUSG00000022100	MOUSE14_71_PE23	HBG040299
ENSMUSG00000040594	MOUSE11_35_PE1	HBG040299
ENSMUSG00000022711	MOUSE16_9_PE7	HBG019107
ENSMUSG00000022474	MOUSE15_85_PE20	HBG019107
ENSMUSG00000022451	MOUSE15_98_PE5	HBG001015
ENSMUSG00000073918	MOUSE7_108_PE28	HBG001015
ENSMUSG00000023277	MOUSE9_110_PE12	HBG001015
ENSMUSG00000027361	MOUSE2_128_PE8	HBG052200
ENSMUSG00000038766	MOUSE3_98_PE21	HBG052200
ENSMUSG00000034807	MOUSE8_76_PE25	HBG010471
ENSMUSG00000032649	MOUSE1_157_PE3	HBG010471
ENSMUSG00000028478	MOUSE4_45_PE26	HBG035198
ENSMUSG00000047547	MOUSE13_57_PE10	HBG035198
ENSMUSG00000043487	MOUSE12_88_PE19	HBG070352
ENSMUSG00000039653	MOUSE4_51_PE4	HBG070352
ENSMUSG00000070985	MOUSE4_51_PE3	HBG070352
ENSMUSG00000060317	MOUSE4_51_PE2	HBG070352
ENSMUSG00000039286	MOUSE3_29_PE1	HBG026480
ENSMUSG00000033487	MOUSE14_73_PE1	HBG026480
ENSMUSG00000024222	MOUSE17_30_PE23	HBG022658
ENSMUSG00000030357	MOUSE6_129_PE4	HBG022658
ENSMUSG00000027175	MOUSE2_106_PE3	HBG029634
ENSMUSG00000020034	MOUSE10_87_PE5	HBG029634
ENSMUSG00000053110	MOUSE9_9_PE1	HBG049904
ENSMUSG00000027803	MOUSE3_59_PE4	HBG049904
ENSMUSG00000026421	MOUSE1_140_PE14	HBG059752
ENSMUSG00000030470	MOUSE7_50_PE7	HBG059752
ENSMUSG00000060451	MOUSE14_24_PE5	HBG059752
ENSMUSG00000023968	MOUSE17_48_PE21	HBG059752
ENSMUSG00000009647	MOUSE10_61_PE11	HBG085344
ENSMUSG00000027994	MOUSE3_134_PE2	HBG085344
ENSMUSG00000028278	MOUSE4_34_PE13	HBG025544
ENSMUSG00000028646	MOUSE4_127_PE17	HBG025544
ENSMUSG00000030226	MOUSE6_139_PE1	HBG054966
ENSMUSG00000036111	MOUSE7_112_PE26	HBG054966
ENSMUSG00000029513	MOUSE5_120_PE2	HBG020897
ENSMUSG00000038205	MOUSE3_100_PE13	HBG020897
ENSMUSG00000068748	MOUSE6_25_PE1	HBG061381
ENSMUSG00000021745	MOUSE14_11_PE1	HBG061381
ENSMUSG00000033278	MOUSE17_70_PE3	HBG061381
ENSMUSG00000019889	MOUSE10_29_PE2	HBG061381
ENSMUSG00000028291	MOUSE4_36_PE2	HBG032633
ENSMUSG00000023075	MOUSE4_127_PE11	HBG032633
ENSMUSG00000021256	MOUSE12_91_PE1	HBG022990
ENSMUSG00000037568	MOUSE1_197_PE3	HBG022990
ENSMUSG00000034152	MOUSE13_77_PE20	HBG021096
ENSMUSG00000043251	MOUSE8_110_PE14	HBG021096
ENSMUSG00000060012	MOUSE14_65_PE4	HBG003574
ENSMUSG00000021375	MOUSE13_49_PE5	HBG003574
ENSMUSG00000026064	MOUSE1_32_PE6	HBG024378
ENSMUSG00000071558	MOUSE19_42_PE4	HBG024378
ENSMUSG00000060795	MOUSE2_21_PE1	HBG024378
ENSMUSG00000058873	MOUSE6_131_PE3	HBG024378
ENSMUSG00000060695	MOUSE14_40_PE2	HBG024378
ENSMUSG00000059895	MOUSE15_77_PE6	HBG024378
ENSMUSG00000030235	MOUSE6_142_PE2	HBG069193
ENSMUSG00000030236	MOUSE6_142_PE3	HBG069193
ENSMUSG00000021314	MOUSE13_20_PE2	HBG064013
ENSMUSG00000024381	MOUSE18_34_PE11	HBG064013
ENSMUSG00000020523	MOUSE11_59_PE3	HBG038374
ENSMUSG00000029185	MOUSE5_67_PE4	HBG038374
ENSMUSG00000042351	MOUSE15_84_PE2	HBG008757
ENSMUSG00000004837	MOUSE11_64_PE3	HBG008757
ENSMUSG00000030494	MOUSE7_36_PE8	HBG000158
ENSMUSG00000022580	MOUSE15_79_PE7	HBG000158
ENSMUSG00000027531	MOUSE3_11_PE7	HBG000692
ENSMUSG00000024525	MOUSE18_70_PE5	HBG000692
ENSMUSG00000026970	MOUSE2_61_PE5	HBG002201
ENSMUSG00000039607	MOUSE9_121_PE3	HBG002201
ENSMUSG00000026896	MOUSE2_63_PE4	HBG048168
ENSMUSG00000040296	MOUSE4_41_PE4	HBG048168
ENSMUSG00000054455	MOUSE2_176_PE6	HBG067978
ENSMUSG00000046487	MOUSE18_49_PE4	HBG067978
ENSMUSG00000024091	MOUSE17_69_PE1	HBG067978
ENSMUSG00000034801	MOUSE12_73_PE3	HBG002388
ENSMUSG00000024241	MOUSE17_84_PE1	HBG002388
ENSMUSG00000026452	MOUSE1_139_PE19	HBG067820
ENSMUSG00000004961	MOUSE7_5_PE9	HBG067820
ENSMUSG00000030731	MOUSE7_45_PE42	HBG067820
ENSMUSG00000062542	MOUSE7_111_PE1	HBG067820
ENSMUSG00000068923	MOUSE3_91_PE50	HBG067820
ENSMUSG00000024261	MOUSE18_33_PE3	HBG067820
ENSMUSG00000016200	MOUSE1_199_PE1	HBG067820
ENSMUSG00000044912	MOUSE12_77_PE6	HBG067820
ENSMUSG00000024871	MOUSE19_5_PE3	HBG067820
ENSMUSG00000029608	MOUSE5_125_PE8	HBG067820
ENSMUSG00000023913	MOUSE17_45_PE5	HBG077100
ENSMUSG00000037366	MOUSE4_138_PE10	HBG077100
ENSMUSG00000026058	MOUSE1_34_PE1	HBG068190
ENSMUSG00000022332	MOUSE15_72_PE2	HBG068190
ENSMUSG00000028641	MOUSE4_122_PE33	HBG056870
ENSMUSG00000038168	MOUSE16_27_PE5	HBG056870
ENSMUSG00000052684	MOUSE4_97_PE6	HBG076901
ENSMUSG00000071076	MOUSE8_75_PE17	HBG076901
ENSMUSG00000024084	MOUSE17_82_PE15	HBG006363
ENSMUSG00000030407	MOUSE7_19_PE25	HBG006363
ENSMUSG00000037373	MOUSE5_35_PE15	HBG056715
ENSMUSG00000030970	MOUSE7_137_PE9	HBG056715
ENSMUSG00000046997	MOUSE9_100_PE10	HBG015433
ENSMUSG00000039911	MOUSE4_153_PE13	HBG015433
ENSMUSG00000022867	MOUSE16_80_PE1	HBG020488
ENSMUSG00000032267	MOUSE9_51_PE5	HBG020488
ENSMUSG00000040713	MOUSE1_171_PE13	HBG040926
ENSMUSG00000050967	MOUSE1_41_PE12	HBG040926
ENSMUSG00000001542	MOUSE13_79_PE1	HBG025148
ENSMUSG00000070002	MOUSE8_75_PE10	HBG025148
ENSMUSG00000032253	MOUSE9_86_PE2	HBG071883
ENSMUSG00000022914	MOUSE16_99_PE4	HBG071883
ENSMUSG00000055839	MOUSE17_25_PE28	HBG001680
ENSMUSG00000072563	MOUSE11_92_PE6	HBG001680
ENSMUSG00000057534	MOUSE11_92_PE3	HBG001680
ENSMUSG00000022295	MOUSE15_40_PE9	HBG075629
ENSMUSG00000020566	MOUSE12_18_PE8	HBG075629
ENSMUSG00000004231	MOUSE19_46_PE5	HBG060095
ENSMUSG00000026976	MOUSE2_25_PE12	HBG060095
ENSMUSG00000001497	MOUSE12_59_PE5	HBG060095
ENSMUSG00000037034	MOUSE2_149_PE5	HBG060095
ENSMUSG00000013584	MOUSE9_74_PE10	HBG075000
ENSMUSG00000015134	MOUSE7_68_PE13	HBG075000
ENSMUSG00000042557	MOUSE9_59_PE11	HBG047376
ENSMUSG00000031622	MOUSE8_77_PE13	HBG047376
ENSMUSG00000028580	MOUSE4_134_PE16	HBG019795
ENSMUSG00000020594	MOUSE12_9_PE14	HBG019795
ENSMUSG00000029333	MOUSE5_102_PE6	HBG025017
ENSMUSG00000020374	MOUSE11_52_PE10	HBG025017
ENSMUSG00000058325	MOUSE7_139_PE1	HBG056712
ENSMUSG00000020143	MOUSE11_36_PE1	HBG056712
ENSMUSG00000039716	MOUSE9_111_PE18	HBG056712
ENSMUSG00000035954	MOUSE12_42_PE12	HBG056712
ENSMUSG00000020089	MOUSE10_63_PE21	HBG014274
ENSMUSG00000028013	MOUSE3_137_PE8	HBG014274
ENSMUSG00000032046	MOUSE2_152_PE17	HBG069996
ENSMUSG00000071290	MOUSE12_73_PE16	HBG069996
ENSMUSG00000025060	MOUSE19_49_PE5	HBG048858
ENSMUSG00000020272	MOUSE11_34_PE4	HBG048858
ENSMUSG00000050966	MOUSE4_137_PE27	HBG088168
ENSMUSG00000063804	MOUSE10_47_PE3	HBG088168
ENSMUSG00000048570	MOUSE11_80_PE10	HBG073713
ENSMUSG00000043566	MOUSE3_19_PE3	HBG073713
ENSMUSG00000029392	MOUSE5_128_PE29	HBG021346
ENSMUSG00000038195	MOUSE11_78_PE30	HBG021346
ENSMUSG00000019806	MOUSE10_14_PE9	HBG060881
ENSMUSG00000058022	MOUSE13_44_PE1	HBG060881
ENSMUSG00000003178	MOUSE6_121_PE9	HBG037399
ENSMUSG00000038244	MOUSE7_116_PE2	HBG037399
ENSMUSG00000030872	MOUSE7_125_PE9	HBG071275
ENSMUSG00000033128	MOUSE15_82_PE14	HBG071275
ENSMUSG00000053617	MOUSE19_49_PE1	HBG049088
ENSMUSG00000040711	MOUSE11_34_PE1	HBG049088
ENSMUSG00000018583	MOUSE11_57_PE24	HBG025694
ENSMUSG00000067446	MOUSE8_102_PE2	HBG025694
ENSMUSG00000029405	MOUSE5_96_PE8	HBG025694
ENSMUSG00000049336	MOUSE11_38_PE1	HBG025133
ENSMUSG00000016150	MOUSEX_40_PE3	HBG025133
ENSMUSG00000060429	MOUSE15_58_PE12	HBG059325
ENSMUSG00000027488	MOUSE2_156_PE12	HBG059325
ENSMUSG00000025909	MOUSE1_9_PE1	HBG059325
ENSMUSG00000020672	MOUSE12_32_PE1	HBG059325
ENSMUSG00000036026	MOUSE17_47_PE21	HBG019577
ENSMUSG00000034145	MOUSE12_91_PE9	HBG019577
ENSMUSG00000000420	MOUSE18_25_PE12	HBG068984
ENSMUSG00000060988	MOUSE2_55_PE1	HBG068984
ENSMUSG00000017677	MOUSE11_82_PE8	HBG020908
ENSMUSG00000029364	MOUSE5_121_PE7	HBG020908
ENSMUSG00000033326	MOUSE4_121_PE17	HBG050536
ENSMUSG00000028397	MOUSE4_76_PE2	HBG050536
ENSMUSG00000059974	MOUSE9_31_PE1	HBG038234
ENSMUSG00000062257	MOUSE9_30_PE1	HBG038234
ENSMUSG00000061080	MOUSE16_44_PE2	HBG038234
ENSMUSG00000031385	MOUSEX_71_PE29	HBG055834
ENSMUSG00000036606	MOUSE15_92_PE21	HBG055834
ENSMUSG00000030759	MOUSE7_117_PE7	HBG014792
ENSMUSG00000030303	MOUSE6_149_PE1	HBG014792
ENSMUSG00000067382	MOUSEX_129_PE1	HBG025372
ENSMUSG00000059343	MOUSE4_74_PE1	HBG025372
ENSMUSG00000063129	MOUSE12_58_PE13	HBG025372
ENSMUSG00000030695	MOUSE7_130_PE41	HBG025372
ENSMUSG00000017390	MOUSE11_81_PE44	HBG025372
ENSMUSG00000033287	MOUSE15_81_PE27	HBG073639
ENSMUSG00000016946	MOUSE17_25_PE44	HBG073639
ENSMUSG00000037477	MOUSE19_5_PE1	HBG069681
ENSMUSG00000009097	MOUSE16_19_PE32	HBG069681
ENSMUSG00000062327	MOUSE17_9_PE14	HBG069681
ENSMUSG00000026572	MOUSE1_171_PE2	HBG069681
ENSMUSG00000025094	MOUSE19_61_PE12	HBG087409
ENSMUSG00000036330	MOUSE8_73_PE6	HBG087409
ENSMUSG00000026888	MOUSE2_65_PE3	HBG021442
ENSMUSG00000020176	MOUSE11_13_PE1	HBG021442
ENSMUSG00000029146	MOUSE5_33_PE29	HBG002047
ENSMUSG00000013611	MOUSE15_38_PE11	HBG002047
ENSMUSG00000023977	MOUSE17_49_PE5	HBG003607
ENSMUSG00000027272	MOUSE2_122_PE23	HBG003607
ENSMUSG00000032575	MOUSE9_111_PE16	HBG002350
ENSMUSG00000039496	MOUSE2_4_PE20	HBG002350
ENSMUSG00000040857	MOUSE7_26_PE11	HBG055917
ENSMUSG00000003382	MOUSE3_90_PE14	HBG055917
ENSMUSG00000069805	MOUSE13_65_PE9	HBG016643
ENSMUSG00000021456	MOUSE13_65_PE8	HBG016643
ENSMUSG00000026155	MOUSE1_25_PE5	HBG085575
ENSMUSG00000032870	MOUSE4_124_PE15	HBG085575
ENSMUSG00000020368	MOUSE11_52_PE21	HBG085203
ENSMUSG00000002190	MOUSE8_88_PE7	HBG085203
ENSMUSG00000020666	MOUSE12_4_PE9	HBG044912
ENSMUSG00000049696	MOUSE7_42_PE9	HBG044912
ENSMUSG00000048690	MOUSE1_157_PE5	HBG044912
ENSMUSG00000011179	MOUSE12_18_PE10	HBG044912
ENSMUSG00000023120	MOUSE4_134_PE11	HBG044912
ENSMUSG00000024908	MOUSE19_4_PE8	HBG068017
ENSMUSG00000036561	MOUSE15_93_PE1	HBG068017
ENSMUSG00000028830	MOUSE4_130_PE15	HBG078683
ENSMUSG00000006711	MOUSE13_26_PE14	HBG078683
ENSMUSG00000039959	MOUSE5_141_PE2	HBG020888
ENSMUSG00000000915	MOUSE5_128_PE9	HBG020888
ENSMUSG00000031903	MOUSE8_111_PE9	HBG083171
ENSMUSG00000035237	MOUSE8_110_PE56	HBG083171
ENSMUSG00000027463	MOUSE2_153_PE20	HBG020457
ENSMUSG00000022560	MOUSE15_80_PE4	HBG020457
ENSMUSG00000028995	MOUSE5_25_PE6	HBG024128
ENSMUSG00000038174	MOUSE1_61_PE10	HBG024128
ENSMUSG00000069255	MOUSE13_32_PE5	HBG073223
ENSMUSG00000042662	MOUSE2_154_PE41	HBG073223
ENSMUSG00000023942	MOUSE17_47_PE19	HBG061752
ENSMUSG00000024891	MOUSE19_6_PE1	HBG061752
ENSMUSG00000042626	MOUSE3_92_PE46	HBG060901
ENSMUSG00000035109	MOUSE2_127_PE4	HBG060901
ENSMUSG00000014773	MOUSE17_17_PE2	HBG037720
ENSMUSG00000027314	MOUSE2_120_PE34	HBG037720
ENSMUSG00000019997	MOUSE10_25_PE21	HBG076242
ENSMUSG00000062074	MOUSE10_40_PE4	HBG076242
ENSMUSG00000021838	MOUSE14_47_PE7	HBG048244
ENSMUSG00000037513	MOUSE7_29_PE23	HBG048244
ENSMUSG00000008206	MOUSE8_5_PE19	HBG088367
ENSMUSG00000030510	MOUSE7_69_PE6	HBG088367
ENSMUSG00000033478	MOUSE19_59_PE4	HBG056837
ENSMUSG00000022095	MOUSE14_71_PE16	HBG056837
ENSMUSG00000034168	MOUSE12_91_PE5	HBG069907
ENSMUSG00000044030	MOUSE7_19_PE16	HBG069907
ENSMUSG00000031659	MOUSE8_93_PE9	HBG090614
ENSMUSG00000022220	MOUSE14_56_PE40	HBG090614
ENSMUSG00000032740	MOUSE11_31_PE1	HBG083253
ENSMUSG00000047810	MOUSE19_7_PE39	HBG083253
ENSMUSG00000021852	MOUSE14_50_PE1	HBG061554
ENSMUSG00000057060	MOUSE8_132_PE1	HBG061554
ENSMUSG00000002257	MOUSE17_30_PE15	HBG088128
ENSMUSG00000031015	MOUSE7_113_PE21	HBG088128
ENSMUSG00000027808	MOUSE3_60_PE8	HBG008238
ENSMUSG00000052584	MOUSE14_77_PE8	HBG008238
ENSMUSG00000028070	MOUSE3_91_PE17	HBG031931
ENSMUSG00000048967	MOUSE8_74_PE20	HBG031931
ENSMUSG00000021466	MOUSE13_66_PE6	HBG043981
ENSMUSG00000028681	MOUSE4_120_PE18	HBG043981
ENSMUSG00000067276	MOUSEX_139_PE8	HBG083588
ENSMUSG00000035547	MOUSE7_101_PE17	HBG083588
ENSMUSG00000051951	MOUSE1_4_PE2	HBG058144
ENSMUSG00000042631	MOUSE2_155_PE2	HBG058144
ENSMUSG00000015342	MOUSEX_9_PE11	HBG058144
ENSMUSG00000031258	MOUSEX_130_PE8	HBG058144
ENSMUSG00000027708	MOUSE3_38_PE2	HBG038206
ENSMUSG00000074910	MOUSE13_52_PE4	HBG038206
ENSMUSG00000038506	MOUSE8_14_PE20	HBG038206
ENSMUSG00000051674	MOUSE5_76_PE18	HBG038206
ENSMUSG00000032002	MOUSE9_8_PE2	HBG038206
ENSMUSG00000057111	MOUSEX_13_PE5	HBG019468
ENSMUSG00000060036	MOUSE15_83_PE29	HBG019468
ENSMUSG00000068262	MOUSE6_87_PE7	HBG019468
ENSMUSG00000060264	MOUSE4_116_PE3	HBG019468
ENSMUSG00000002500	MOUSE17_26_PE50	HBG019468
ENSMUSG00000037509	MOUSE1_36_PE19	HBG053360
ENSMUSG00000025656	MOUSEX_92_PE3	HBG053360
ENSMUSG00000027455	MOUSE2_153_PE5	HBG086576
ENSMUSG00000039833	MOUSE5_52_PE1	HBG086576
ENSMUSG00000028243	MOUSE4_7_PE1	HBG086576
ENSMUSG00000030302	MOUSE6_114_PE11	HBG056566
ENSMUSG00000026463	MOUSE1_138_PE14	HBG056566
ENSMUSG00000042246	MOUSE7_122_PE8	HBG067860
ENSMUSG00000019734	MOUSE7_4_PE9	HBG067860
ENSMUSG00000016933	MOUSE2_162_PE5	HBG026400
ENSMUSG00000034330	MOUSE8_123_PE3	HBG026400
ENSMUSG00000028820	MOUSE4_130_PE17	HBG039104
ENSMUSG00000021938	MOUSE14_57_PE13	HBG039104
ENSMUSG00000053907	MOUSE6_71_PE20	HBG000397
ENSMUSG00000037798	MOUSE14_41_PE8	HBG000397
ENSMUSG00000037253	MOUSE18_77_PE1	HBG082866
ENSMUSG00000048696	MOUSE10_83_PE42	HBG082866
ENSMUSG00000040276	MOUSE17_29_PE15	HBG059468
ENSMUSG00000027257	MOUSE2_92_PE36	HBG059468
ENSMUSG00000022607	MOUSE15_76_PE9	HBG024329
ENSMUSG00000059456	MOUSE14_67_PE3	HBG024329
ENSMUSG00000021140	MOUSE12_85_PE15	HBG072203
ENSMUSG00000054874	MOUSE19_6_PE43	HBG072203
ENSMUSG00000027695	MOUSE3_29_PE3	HBG004713
ENSMUSG00000020828	MOUSE11_73_PE67	HBG004713
ENSMUSG00000034021	MOUSE5_156_PE11	HBG057611
ENSMUSG00000029202	MOUSE5_68_PE3	HBG057611
ENSMUSG00000002489	MOUSE16_93_PE2	HBG006351
ENSMUSG00000023800	MOUSE17_4_PE6	HBG006351
ENSMUSG00000034009	MOUSE3_82_PE8	HBG056430
ENSMUSG00000053368	MOUSE5_156_PE1	HBG056430
ENSMUSG00000023074	MOUSEX_51_PE3	HBG014290
ENSMUSG00000037221	MOUSE5_143_PE15	HBG014290
ENSMUSG00000022358	MOUSE15_61_PE9	HBG026587
ENSMUSG00000038365	MOUSE8_15_PE4	HBG026587
ENSMUSG00000039065	MOUSE15_33_PE12	HBG038579
ENSMUSG00000057411	MOUSE17_27_PE35	HBG038579
ENSMUSG00000014767	MOUSE17_17_PE7	HBG021405
ENSMUSG00000061809	MOUSE2_25_PE2	HBG021405
ENSMUSG00000024421	MOUSE18_13_PE9	HBG020183
ENSMUSG00000015647	MOUSE2_183_PE5	HBG020183
ENSMUSG00000019790	MOUSE10_10_PE4	HBG057798
ENSMUSG00000022829	MOUSE16_39_PE14	HBG057798
ENSMUSG00000040760	MOUSE14_27_PE1	HBG022171
ENSMUSG00000020263	MOUSE10_86_PE9	HBG022171
ENSMUSG00000037416	MOUSE18_52_PE2	HBG001796
ENSMUSG00000041268	MOUSE9_57_PE1	HBG001796
ENSMUSG00000001054	MOUSE11_54_PE6	HBG003764
ENSMUSG00000002222	MOUSE6_70_PE17	HBG003764
ENSMUSG00000041313	MOUSE5_154_PE5	HBG020076
ENSMUSG00000031297	MOUSEX_98_PE4	HBG020076
ENSMUSG00000033545	MOUSE8_117_PE1	HBG038505
ENSMUSG00000058446	MOUSE6_55_PE12	HBG038505
ENSMUSG00000037035	MOUSE1_124_PE1	HBG024451
ENSMUSG00000041324	MOUSE13_17_PE1	HBG024451
ENSMUSG00000019899	MOUSE10_28_PE3	HBG058226
ENSMUSG00000032796	MOUSE17_71_PE2	HBG058226
ENSMUSG00000035620	MOUSE10_88_PE4	HBG058550
ENSMUSG00000025485	MOUSE7_145_PE21	HBG058550
ENSMUSG00000025103	MOUSE7_84_PE19	HBG004637
ENSMUSG00000074730	MOUSE2_152_PE9	HBG004637
ENSMUSG00000003344	MOUSE10_83_PE63	HBG004637
ENSMUSG00000015766	MOUSE6_138_PE4	HBG089300
ENSMUSG00000025504	MOUSE7_145_PE60	HBG089300
ENSMUSG00000035325	MOUSE5_104_PE4	HBG003474
ENSMUSG00000051984	MOUSE19_46_PE2	HBG003474
ENSMUSG00000028680	MOUSE4_120_PE21	HBG072856
ENSMUSG00000035486	MOUSE10_83_PE41	HBG072856
ENSMUSG00000026718	MOUSE2_15_PE1	HBG016056
ENSMUSG00000055371	MOUSE2_53_PE3	HBG016056
ENSMUSG00000024188	MOUSE17_28_PE8	HBG056341
ENSMUSG00000029823	MOUSE6_40_PE17	HBG056341
ENSMUSG00000005534	MOUSE8_4_PE3	HBG038350
ENSMUSG00000005533	MOUSE7_70_PE10	HBG038350
ENSMUSG00000053799	MOUSE19_38_PE12	HBG037585
ENSMUSG00000033769	MOUSE6_84_PE2	HBG037585
ENSMUSG00000026478	MOUSE1_158_PE4	HBG058764
ENSMUSG00000026840	MOUSE2_33_PE5	HBG058764
ENSMUSG00000024847	MOUSE19_5_PE12	HBG087606
ENSMUSG00000040554	MOUSE11_75_PE1	HBG087606
ENSMUSG00000041420	MOUSE7_16_PE13	HBG056437
ENSMUSG00000020160	MOUSE11_20_PE1	HBG056437
ENSMUSG00000035934	MOUSE9_39_PE3	HBG056437
ENSMUSG00000006705	MOUSE17_33_PE26	HBG056437
ENSMUSG00000032338	MOUSE9_61_PE9	HBG090903
ENSMUSG00000028051	MOUSE3_92_PE13	HBG090903
ENSMUSG00000067220	MOUSE5_75_PE12	HBG090903
ENSMUSG00000030897	MOUSE7_109_PE9	HBG090903
ENSMUSG00000075415	MOUSE2_32_PE11	HBG026409
ENSMUSG00000039735	MOUSE3_126_PE3	HBG026409
ENSMUSG00000040640	MOUSE14_28_PE1	HBG022176
ENSMUSG00000030172	MOUSE6_120_PE1	HBG022176
ENSMUSG00000049940	MOUSE3_43_PE13	HBG066906
ENSMUSG00000006373	MOUSEX_34_PE4	HBG066906
ENSMUSG00000074345	MOUSE9_56_PE11	HBG007417
ENSMUSG00000044469	MOUSE17_58_PE26	HBG007417
ENSMUSG00000056121	MOUSE17_81_PE3	HBG002349
ENSMUSG00000032118	MOUSE9_39_PE1	HBG002349
ENSMUSG00000024826	MOUSE19_6_PE58	HBG079292
ENSMUSG00000021221	MOUSE12_87_PE3	HBG079292
ENSMUSG00000026313	MOUSE1_96_PE9	HBG086985
ENSMUSG00000004698	MOUSE12_36_PE1	HBG086985
ENSMUSG00000021224	MOUSE12_88_PE6	HBG019560
ENSMUSG00000063160	MOUSE7_28_PE9	HBG019560
ENSMUSG00000071642	MOUSE16_16_PE2	HBG056995
ENSMUSG00000051285	MOUSE1_8_PE1	HBG056995
ENSMUSG00000071032	MOUSE17_95_PE3	HBG056995
ENSMUSG00000027589	MOUSE2_184_PE42	HBG056995
ENSMUSG00000029474	MOUSE5_127_PE8	HBG020896
ENSMUSG00000020696	MOUSE11_85_PE16	HBG020896
ENSMUSG00000038600	MOUSE6_40_PE3	HBG082912
ENSMUSG00000038023	MOUSE5_129_PE5	HBG082912
ENSMUSG00000010307	MOUSE7_48_PE23	HBG061503
ENSMUSG00000045282	MOUSE7_5_PE11	HBG061503
ENSMUSG00000033420	MOUSE6_86_PE13	HBG023065
ENSMUSG00000029338	MOUSE5_101_PE3	HBG023065
ENSMUSG00000028426	MOUSE4_57_PE6	HBG028009
ENSMUSG00000003813	MOUSE8_89_PE24	HBG028009
ENSMUSG00000024579	MOUSE18_64_PE24	HBG019753
ENSMUSG00000029998	MOUSE6_85_PE22	HBG019753
ENSMUSG00000018698	MOUSE11_87_PE11	HBG078251
ENSMUSG00000029595	MOUSE5_124_PE3	HBG078251
ENSMUSG00000026934	MOUSE2_27_PE6	HBG078251
ENSMUSG00000026468	MOUSE1_160_PE11	HBG078251
ENSMUSG00000038765	MOUSE2_35_PE1	HBG078251
ENSMUSG00000026686	MOUSE1_173_PE11	HBG078251
ENSMUSG00000026890	MOUSE2_37_PE13	HBG078251
ENSMUSG00000028201	MOUSE3_158_PE9	HBG078251
ENSMUSG00000000247	MOUSE2_39_PE15	HBG078251
ENSMUSG00000019230	MOUSE1_143_PE8	HBG078251
ENSMUSG00000041225	MOUSE18_7_PE1	HBG067671
ENSMUSG00000049744	MOUSE2_44_PE4	HBG067671
ENSMUSG00000073381	MOUSE17_58_PE25	HBG071390
ENSMUSG00000001227	MOUSE17_58_PE24	HBG071390
ENSMUSG00000038777	MOUSE3_98_PE18	HBG071390
ENSMUSG00000028847	MOUSE4_129_PE18	HBG002836
ENSMUSG00000071340	MOUSE10_35_PE10	HBG002836
ENSMUSG00000031024	MOUSE7_113_PE3	HBG092667
ENSMUSG00000027901	MOUSE3_110_PE4	HBG092667
ENSMUSG00000002668	MOUSE17_59_PE48	HBG092667
ENSMUSG00000035392	MOUSE2_39_PE12	HBG092667
ENSMUSG00000034295	MOUSE18_26_PE8	HBG071087
ENSMUSG00000014778	MOUSE8_110_PE21	HBG071087
ENSMUSG00000029636	MOUSE5_152_PE5	HBG074547
ENSMUSG00000019831	MOUSE10_42_PE14	HBG074547
ENSMUSG00000033335	MOUSE9_22_PE32	HBG089116
ENSMUSG00000026825	MOUSE2_33_PE18	HBG089116
ENSMUSG00000006567	MOUSE8_24_PE1	HBG026321
ENSMUSG00000033792	MOUSEX_103_PE6	HBG026321
ENSMUSG00000039414	MOUSE17_82_PE5	HBG019670
ENSMUSG00000035181	MOUSE12_54_PE5	HBG019670
ENSMUSG00000027692	MOUSE3_30_PE1	HBG035471
ENSMUSG00000026074	MOUSE1_42_PE1	HBG035471
ENSMUSG00000028556	MOUSE4_101_PE12	HBG052905
ENSMUSG00000052085	MOUSE19_26_PE1	HBG052905
ENSMUSG00000031093	MOUSEX_33_PE4	HBG052905
ENSMUSG00000038608	MOUSE1_82_PE5	HBG052905
ENSMUSG00000034445	MOUSE19_11_PE26	HBG023146
ENSMUSG00000027015	MOUSE2_72_PE8	HBG023146
ENSMUSG00000031819	MOUSE8_126_PE6	HBG060601
ENSMUSG00000022217	MOUSE14_56_PE15	HBG060601
ENSMUSG00000028656	MOUSE4_126_PE6	HBG020053
ENSMUSG00000021373	MOUSE13_49_PE1	HBG020053
ENSMUSG00000028962	MOUSE5_25_PE17	HBG050769
ENSMUSG00000006576	MOUSE1_77_PE45	HBG050769
ENSMUSG00000047281	MOUSE4_137_PE18	HBG068683
ENSMUSG00000018326	MOUSE2_166_PE7	HBG068683
ENSMUSG00000028488	MOUSE4_87_PE3	HBG058975
ENSMUSG00000030638	MOUSE7_85_PE1	HBG058975
ENSMUSG00000030691	MOUSE7_104_PE24	HBG000626
ENSMUSG00000038524	MOUSE18_40_PE14	HBG000626
ENSMUSG00000058793	MOUSE2_134_PE1	HBG016298
ENSMUSG00000029330	MOUSE5_105_PE2	HBG016298
ENSMUSG00000039942	MOUSE15_6_PE7	HBG050281
ENSMUSG00000043017	MOUSE7_17_PE9	HBG050281
ENSMUSG00000022425	MOUSE15_57_PE8	HBG020440
ENSMUSG00000019989	MOUSE10_25_PE23	HBG020440
ENSMUSG00000026646	MOUSE2_4_PE15	HBG081872
ENSMUSG00000039231	MOUSEX_8_PE19	HBG081872
ENSMUSG00000034285	MOUSE11_5_PE27	HBG003856
ENSMUSG00000029432	MOUSE5_135_PE1	HBG003856
ENSMUSG00000026418	MOUSE1_140_PE17	HBG059108
ENSMUSG00000035458	MOUSE7_5_PE7	HBG059108
ENSMUSG00000044465	MOUSE7_109_PE8	HBG000943
ENSMUSG00000051000	MOUSE3_88_PE3	HBG000943
ENSMUSG00000073198	MOUSE12_19_PE7	HBG001951
ENSMUSG00000022051	MOUSE14_67_PE16	HBG001951
ENSMUSG00000066094	MOUSE4_102_PE1	HBG001951
ENSMUSG00000072594	MOUSE14_45_PE2	HBG001951
ENSMUSG00000020340	MOUSE11_48_PE11	HBG002844
ENSMUSG00000030447	MOUSE7_58_PE2	HBG002844
ENSMUSG00000014959	MOUSE2_71_PE9	HBG022126
ENSMUSG00000032513	MOUSE9_124_PE10	HBG022126
ENSMUSG00000032328	MOUSE9_83_PE5	HBG004482
ENSMUSG00000022753	MOUSE16_60_PE5	HBG004482
ENSMUSG00000039886	MOUSE5_141_PE8	HBG004795
ENSMUSG00000054434	MOUSE5_127_PE16	HBG004795
ENSMUSG00000036893	MOUSE2_25_PE17	HBG022369
ENSMUSG00000013787	MOUSE17_37_PE17	HBG022369
ENSMUSG00000022066	MOUSE14_70_PE6	HBG059174
ENSMUSG00000025192	MOUSE19_45_PE4	HBG059174
ENSMUSG00000048264	MOUSE13_10_PE6	HBG026328
ENSMUSG00000020231	MOUSE10_79_PE17	HBG026328
ENSMUSG00000019857	MOUSE10_55_PE7	HBG082844
ENSMUSG00000005470	MOUSE8_88_PE24	HBG082844
ENSMUSG00000036751	MOUSE7_31_PE51	HBG013723
ENSMUSG00000051811	MOUSE7_5_PE19	HBG013723
ENSMUSG00000013415	MOUSE11_99_PE3	HBG002050
ENSMUSG00000033581	MOUSE16_23_PE10	HBG002050
ENSMUSG00000069094	MOUSE3_20_PE4	HBG005910
ENSMUSG00000019990	MOUSE10_21_PE9	HBG005910
ENSMUSG00000024066	MOUSE17_77_PE3	HBG026354
ENSMUSG00000038242	MOUSE1_60_PE11	HBG026354
ENSMUSG00000064294	MOUSE1_60_PE10	HBG026354
ENSMUSG00000063558	MOUSE1_60_PE9	HBG026354
ENSMUSG00000041890	MOUSE5_118_PE24	HBG059436
ENSMUSG00000011877	MOUSE11_80_PE17	HBG059436
ENSMUSG00000005078	MOUSE12_75_PE7	HBG005497
ENSMUSG00000056197	MOUSE6_72_PE6	HBG005497
ENSMUSG00000051316	MOUSE18_39_PE37	HBG046760
ENSMUSG00000009596	MOUSEX_130_PE16	HBG046760
ENSMUSG00000031529	MOUSE8_37_PE3	HBG048919
ENSMUSG00000024811	MOUSE19_38_PE1	HBG048919
ENSMUSG00000019471	MOUSE9_22_PE16	HBG083352
ENSMUSG00000024780	MOUSE19_30_PE6	HBG083352
ENSMUSG00000006800	MOUSE2_168_PE12	HBG000380
ENSMUSG00000016918	MOUSE1_14_PE3	HBG000380
ENSMUSG00000020064	MOUSE10_65_PE24	HBG024171
ENSMUSG00000029798	MOUSE6_58_PE11	HBG024171
ENSMUSG00000028842	MOUSE4_130_PE2	HBG069104
ENSMUSG00000036698	MOUSE15_76_PE6	HBG069104
ENSMUSG00000026411	MOUSE1_140_PE24	HBG048981
ENSMUSG00000031021	MOUSE7_113_PE9	HBG048981
ENSMUSG00000047407	MOUSE17_74_PE3	HBG074610
ENSMUSG00000045842	MOUSE4_91_PE21	HBG074610
ENSMUSG00000062175	MOUSE2_158_PE33	HBG074610
ENSMUSG00000040289	MOUSE3_9_PE8	HBG089187
ENSMUSG00000019789	MOUSE10_32_PE4	HBG089187
ENSMUSG00000029148	MOUSE5_33_PE35	HBG020378
ENSMUSG00000075590	MOUSE15_79_PE29	HBG020378
ENSMUSG00000025026	MOUSE19_55_PE2	HBG006830
ENSMUSG00000029106	MOUSE5_37_PE1	HBG006830
ENSMUSG00000028165	MOUSE3_139_PE9	HBG027982
ENSMUSG00000037710	MOUSE10_73_PE9	HBG027982
ENSMUSG00000024529	MOUSE18_55_PE3	HBG057447
ENSMUSG00000032334	MOUSE9_60_PE35	HBG057447
ENSMUSG00000050405	MOUSE17_47_PE13	HBG068905
ENSMUSG00000061451	MOUSE19_6_PE6	HBG068905
ENSMUSG00000031953	MOUSE8_117_PE9	HBG016034
ENSMUSG00000069239	MOUSE13_43_PE15	HBG016034
ENSMUSG00000030327	MOUSE6_123_PE11	HBG028795
ENSMUSG00000028923	MOUSE4_145_PE8	HBG028795
ENSMUSG00000001173	MOUSEX_45_PE7	HBG049530
ENSMUSG00000028894	MOUSE4_128_PE7	HBG049530
ENSMUSG00000019877	MOUSE10_59_PE6	HBG061159
ENSMUSG00000023232	MOUSE4_134_PE12	HBG061159
ENSMUSG00000021703	MOUSE13_97_PE9	HBG061159
ENSMUSG00000046110	MOUSE2_123_PE12	HBG061159
ENSMUSG00000021890	MOUSE14_31_PE39	HBG049151
ENSMUSG00000022838	MOUSE16_39_PE5	HBG049151
ENSMUSG00000036815	MOUSE1_128_PE1	HBG058243
ENSMUSG00000061576	MOUSE5_29_PE2	HBG058243
ENSMUSG00000033319	MOUSE18_49_PE5	HBG006671
ENSMUSG00000043683	MOUSE17_58_PE30	HBG006671
ENSMUSG00000052912	MOUSE4_149_PE6	HBG080613
ENSMUSG00000065997	MOUSE4_151_PE8	HBG080613
ENSMUSG00000031715	MOUSE8_85_PE4	HBG080613
ENSMUSG00000031099	MOUSEX_45_PE4	HBG080613
ENSMUSG00000026782	MOUSE1_63_PE2	HBG071644
ENSMUSG00000018381	MOUSE11_98_PE29	HBG071644
ENSMUSG00000036452	MOUSE18_41_PE3	HBG092703
ENSMUSG00000050730	MOUSE9_10_PE5	HBG092703
ENSMUSG00000030862	MOUSE7_136_PE3	HBG036142
ENSMUSG00000027408	MOUSE2_132_PE5	HBG036142
ENSMUSG00000063870	MOUSE6_125_PE44	HBG041338
ENSMUSG00000018474	MOUSE11_72_PE33	HBG041338
ENSMUSG00000025788	MOUSE7_76_PE1	HBG041338
ENSMUSG00000023852	MOUSE17_17_PE14	HBG041338
ENSMUSG00000017670	MOUSE2_167_PE34	HBG091798
ENSMUSG00000041112	MOUSE13_22_PE1	HBG091798
ENSMUSG00000034098	MOUSE3_79_PE1	HBG059876
ENSMUSG00000036264	MOUSE11_55_PE1	HBG059876
ENSMUSG00000018849	MOUSE11_37_PE6	HBG071926
ENSMUSG00000031563	MOUSE8_50_PE9	HBG071926
ENSMUSG00000038429	MOUSE6_125_PE22	HBG002251
ENSMUSG00000056900	MOUSE3_35_PE1	HBG002251
ENSMUSG00000022863	MOUSE16_81_PE2	HBG020807
ENSMUSG00000044645	MOUSE17_53_PE5	HBG020807
ENSMUSG00000032056	MOUSE9_53_PE28	HBG020807
ENSMUSG00000038665	MOUSE6_39_PE1	HBG080971
ENSMUSG00000040479	MOUSE2_93_PE8	HBG080971
ENSMUSG00000045216	MOUSE1_38_PE3	HBG046439
ENSMUSG00000062184	MOUSEX_49_PE1	HBG046439
ENSMUSG00000055013	MOUSE1_94_PE1	HBG072104
ENSMUSG00000023353	MOUSE5_25_PE21	HBG072104
ENSMUSG00000055373	MOUSE4_27_PE1	HBG069103
ENSMUSG00000049307	MOUSE9_15_PE9	HBG069103
ENSMUSG00000031818	MOUSE8_126_PE7	HBG074617
ENSMUSG00000009876	MOUSE2_154_PE34	HBG074617
ENSMUSG00000019232	MOUSE3_134_PE8	HBG059256
ENSMUSG00000020359	MOUSE11_54_PE1	HBG059256
ENSMUSG00000037395	MOUSE1_198_PE4	HBG007205
ENSMUSG00000024968	MOUSE19_8_PE29	HBG007205
ENSMUSG00000036412	MOUSE18_64_PE7	HBG040904
ENSMUSG00000046561	MOUSE3_130_PE2	HBG040904
ENSMUSG00000043445	MOUSE17_26_PE21	HBG038569
ENSMUSG00000068221	MOUSE15_82_PE19	HBG038569
ENSMUSG00000026489	MOUSE1_186_PE8	HBG027149
ENSMUSG00000003762	MOUSE7_28_PE8	HBG027149
ENSMUSG00000037012	MOUSE10_64_PE15	HBG037543
ENSMUSG00000041798	MOUSE11_6_PE26	HBG037543
ENSMUSG00000020859	MOUSE11_97_PE8	HBG006894
ENSMUSG00000024163	MOUSE17_26_PE64	HBG006894
ENSMUSG00000004383	MOUSE8_77_PE15	HBG014984
ENSMUSG00000040434	MOUSE2_93_PE16	HBG014984
ENSMUSG00000020062	MOUSE10_92_PE6	HBG009545
ENSMUSG00000000792	MOUSE8_75_PE33	HBG009545
ENSMUSG00000059713	MOUSE4_139_PE7	HBG027222
ENSMUSG00000022951	MOUSE16_95_PE20	HBG027222
ENSMUSG00000072896	MOUSE11_61_PE59	HBG039042
ENSMUSG00000064145	MOUSE9_113_PE9	HBG039042
ENSMUSG00000032289	MOUSE9_63_PE1	HBG057395
ENSMUSG00000015850	MOUSE3_98_PE46	HBG057395
ENSMUSG00000026409	MOUSE1_135_PE5	HBG025660
ENSMUSG00000025271	MOUSEX_146_PE6	HBG025660
ENSMUSG00000022893	MOUSE16_89_PE1	HBG056504
ENSMUSG00000033453	MOUSE9_32_PE2	HBG056504
ENSMUSG00000030022	MOUSE6_92_PE4	HBG056504
ENSMUSG00000022449	MOUSE15_98_PE1	HBG056504
ENSMUSG00000049538	MOUSE13_74_PE2	HBG056504
ENSMUSG00000053399	MOUSE8_119_PE5	HBG056504
ENSMUSG00000032363	MOUSE9_93_PE10	HBG056504
ENSMUSG00000047497	MOUSE15_12_PE5	HBG056504
ENSMUSG00000037410	MOUSE9_93_PE11	HBG029266
ENSMUSG00000039813	MOUSE4_48_PE10	HBG029266
ENSMUSG00000033068	MOUSE2_152_PE14	HBG033421
ENSMUSG00000021236	MOUSE12_88_PE29	HBG033421
ENSMUSG00000008429	MOUSE9_27_PE2	HBG024178
ENSMUSG00000031770	MOUSE8_99_PE12	HBG024178
ENSMUSG00000028174	MOUSE3_164_PE2	HBG005228
ENSMUSG00000032066	MOUSE9_53_PE4	HBG005228
ENSMUSG00000020635	MOUSE12_5_PE15	HBG068828
ENSMUSG00000032966	MOUSE2_153_PE8	HBG068828
ENSMUSG00000074938	MOUSE16_84_PE1	HBG068828
ENSMUSG00000000958	MOUSE14_55_PE6	HBG088408
ENSMUSG00000031904	MOUSE8_111_PE10	HBG088408
ENSMUSG00000022180	MOUSE14_55_PE26	HBG088408
ENSMUSG00000030495	MOUSE7_36_PE4	HBG088408
ENSMUSG00000003948	MOUSE11_93_PE4	HBG006175
ENSMUSG00000039533	MOUSE5_148_PE8	HBG006175
ENSMUSG00000001211	MOUSE10_81_PE12	HBG016380
ENSMUSG00000023827	MOUSE17_14_PE1	HBG016380
ENSMUSG00000021994	MOUSE14_28_PE5	HBG069724
ENSMUSG00000030170	MOUSE6_119_PE7	HBG069724
ENSMUSG00000021027	MOUSE12_58_PE15	HBG020139
ENSMUSG00000037110	MOUSE2_148_PE5	HBG020139
ENSMUSG00000038178	MOUSE11_78_PE33	HBG057085
ENSMUSG00000027075	MOUSE2_86_PE5	HBG057085
ENSMUSG00000031642	MOUSE8_65_PE12	HBG084180
ENSMUSG00000037990	MOUSE10_61_PE1	HBG084180
ENSMUSG00000027130	MOUSE2_113_PE25	HBG010023
ENSMUSG00000017756	MOUSE13_77_PE9	HBG010023
ENSMUSG00000038740	MOUSE2_35_PE3	HBG059148
ENSMUSG00000031813	MOUSE8_76_PE19	HBG059148
ENSMUSG00000043991	MOUSE18_38_PE5	HBG037538
ENSMUSG00000049184	MOUSE8_35_PE5	HBG037538
ENSMUSG00000013160	MOUSE8_110_PE31	HBG008069
ENSMUSG00000028238	MOUSE4_21_PE1	HBG008069
ENSMUSG00000038486	MOUSE3_99_PE20	HBG064848
ENSMUSG00000053025	MOUSE7_78_PE1	HBG064848
ENSMUSG00000021687	MOUSE13_99_PE3	HBG081757
ENSMUSG00000040188	MOUSE9_60_PE8	HBG081757
ENSMUSG00000032786	MOUSE9_110_PE14	HBG002694
ENSMUSG00000025270	MOUSEX_146_PE4	HBG002694
ENSMUSG00000032187	MOUSE9_22_PE41	HBG058949
ENSMUSG00000024921	MOUSE19_27_PE1	HBG058949
ENSMUSG00000022454	MOUSE15_99_PE2	HBG000827
ENSMUSG00000055409	MOUSE7_52_PE1	HBG000827
ENSMUSG00000037058	MOUSE18_37_PE14	HBG069789
ENSMUSG00000045896	MOUSE6_83_PE1	HBG069789
ENSMUSG00000020658	MOUSE12_4_PE18	HBG002761
ENSMUSG00000015002	MOUSE15_68_PE3	HBG002761
ENSMUSG00000068329	MOUSE6_82_PE6	HBG056427
ENSMUSG00000029096	MOUSE5_38_PE6	HBG056427
ENSMUSG00000022387	MOUSE15_92_PE1	HBG059223
ENSMUSG00000001632	MOUSE6_113_PE12	HBG059223
ENSMUSG00000035376	MOUSE16_37_PE3	HBG078960
ENSMUSG00000074616	MOUSE2_165_PE1	HBG078960
ENSMUSG00000063275	MOUSE2_14_PE8	HBG078960
ENSMUSG00000029186	MOUSE5_55_PE4	HBG036800
ENSMUSG00000025178	MOUSE19_43_PE21	HBG036800
ENSMUSG00000059814	MOUSE10_15_PE7	HBG087501
ENSMUSG00000062019	MOUSE5_6_PE12	HBG087501
ENSMUSG00000015656	MOUSE9_42_PE25	HBG087501
ENSMUSG00000007033	MOUSE17_37_PE24	HBG087501
ENSMUSG00000067283	MOUSE17_37_PE23	HBG087501
ENSMUSG00000067284	MOUSE17_37_PE20	HBG087501
ENSMUSG00000029657	MOUSE5_155_PE15	HBG087501
ENSMUSG00000020361	MOUSE11_55_PE3	HBG087501
ENSMUSG00000019969	MOUSE12_88_PE3	HBG025792
ENSMUSG00000010609	MOUSE1_186_PE9	HBG025792
ENSMUSG00000059288	MOUSE13_38_PE1	HBG050116
ENSMUSG00000031758	MOUSE8_122_PE3	HBG050116
ENSMUSG00000031513	MOUSE8_36_PE15	HBG009288
ENSMUSG00000045952	MOUSE3_116_PE2	HBG009288
ENSMUSG00000035212	MOUSE4_104_PE6	HBG009288
ENSMUSG00000042225	MOUSEX_139_PE1	HBG003475
ENSMUSG00000041915	MOUSE18_33_PE9	HBG003475
ENSMUSG00000070730	MOUSE2_120_PE24	HBG056838
ENSMUSG00000036368	MOUSE17_83_PE2	HBG056838
ENSMUSG00000000308	MOUSE2_123_PE5	HBG010453
ENSMUSG00000021622	MOUSE13_96_PE1	HBG010453
ENSMUSG00000031095	MOUSEX_36_PE6	HBG026015
ENSMUSG00000031446	MOUSE8_14_PE14	HBG026015
ENSMUSG00000072691	MOUSE6_140_PE7	HBG026015
ENSMUSG00000028550	MOUSE4_101_PE14	HBG092638
ENSMUSG00000002820	MOUSE9_22_PE23	HBG092638
ENSMUSG00000045235	MOUSE3_107_PE3	HBG092638
ENSMUSG00000026280	MOUSE1_98_PE9	HBG092638
ENSMUSG00000066228	MOUSE9_128_PE13	HBG092638
ENSMUSG00000002688	MOUSE12_52_PE1	HBG084286
ENSMUSG00000024070	MOUSE17_82_PE14	HBG084286
ENSMUSG00000055817	MOUSE17_87_PE6	HBG019682
ENSMUSG00000071646	MOUSE19_10_PE11	HBG019682
ENSMUSG00000042216	MOUSE5_117_PE8	HBG068080
ENSMUSG00000038351	MOUSE11_78_PE6	HBG068080
ENSMUSG00000030180	MOUSE6_120_PE17	HBG038046
ENSMUSG00000025332	MOUSEX_148_PE7	HBG038046
ENSMUSG00000056673	MOUSEY_1_PE7	HBG038046
ENSMUSG00000055320	MOUSE7_116_PE6	HBG013462
ENSMUSG00000030353	MOUSE6_128_PE10	HBG013462
ENSMUSG00000040323	MOUSE1_167_PE8	HBG031627
ENSMUSG00000015750	MOUSE3_99_PE9	HBG031627
ENSMUSG00000032375	MOUSE9_69_PE21	HBG031627
ENSMUSG00000053040	MOUSE9_70_PE1	HBG031627
ENSMUSG00000032536	MOUSE9_126_PE2	HBG023356
ENSMUSG00000026028	MOUSE1_61_PE19	HBG023356
ENSMUSG00000039987	MOUSE5_21_PE3	HBG023090
ENSMUSG00000058388	MOUSE3_107_PE16	HBG023090
ENSMUSG00000027347	MOUSE2_118_PE7	HBG033265
ENSMUSG00000032946	MOUSE19_7_PE33	HBG033265
ENSMUSG00000060470	MOUSE8_100_PE3	HBG084063
ENSMUSG00000031785	MOUSE8_100_PE1	HBG084063
ENSMUSG00000061577	MOUSE8_99_PE32	HBG084063
ENSMUSG00000004730	MOUSE17_60_PE11	HBG084063
ENSMUSG00000039167	MOUSE3_155_PE1	HBG084063
ENSMUSG00000007817	MOUSE14_25_PE1	HBG054705
ENSMUSG00000041164	MOUSE11_7_PE12	HBG054705
ENSMUSG00000021573	MOUSE13_77_PE16	HBG081858
ENSMUSG00000008813	MOUSE14_52_PE13	HBG081858
ENSMUSG00000070047	MOUSE8_47_PE3	HBG090738
ENSMUSG00000055333	MOUSE11_57_PE20	HBG090738
ENSMUSG00000024900	MOUSE19_4_PE5	HBG058303
ENSMUSG00000007783	MOUSE7_46_PE24	HBG058303
ENSMUSG00000026354	MOUSE1_133_PE10	HBG056431
ENSMUSG00000058488	MOUSE5_156_PE13	HBG056431
ENSMUSG00000028946	MOUSE4_155_PE24	HBG083227
ENSMUSG00000028940	MOUSE4_155_PE19	HBG083227
ENSMUSG00000073714	MOUSE4_150_PE2	HBG074898
ENSMUSG00000073717	MOUSE4_149_PE10	HBG074898
ENSMUSG00000066003	MOUSE4_150_PE12	HBG074898
ENSMUSG00000026626	MOUSE1_197_PE17	HBG074898
ENSMUSG00000024777	MOUSE19_7_PE21	HBG074898
ENSMUSG00000028992	MOUSE4_153_PE4	HBG002777
ENSMUSG00000032456	MOUSE9_102_PE1	HBG002777
ENSMUSG00000035469	MOUSE14_60_PE1	HBG011497
ENSMUSG00000022106	MOUSE14_73_PE4	HBG011497
ENSMUSG00000028525	MOUSE4_105_PE1	HBG003641
ENSMUSG00000031842	MOUSE8_75_PE19	HBG003641
ENSMUSG00000032020	MOUSE9_43_PE4	HBG055589
ENSMUSG00000042345	MOUSE17_33_PE14	HBG055589
ENSMUSG00000020456	MOUSE11_7_PE8	HBG001030
ENSMUSG00000021913	MOUSE14_32_PE11	HBG001030
ENSMUSG00000003233	MOUSE16_21_PE15	HBG085410
ENSMUSG00000020888	MOUSE11_73_PE27	HBG085410
ENSMUSG00000051373	MOUSE2_33_PE9	HBG089477
ENSMUSG00000040105	MOUSE19_30_PE4	HBG089477
ENSMUSG00000018001	MOUSE5_149_PE19	HBG009306
ENSMUSG00000003269	MOUSE7_47_PE19	HBG009306
ENSMUSG00000049686	MOUSE5_127_PE13	HBG005700
ENSMUSG00000039747	MOUSE5_141_PE26	HBG005700
ENSMUSG00000030201	MOUSE6_135_PE2	HBG095634
ENSMUSG00000024913	MOUSE19_4_PE9	HBG095634
ENSMUSG00000029475	MOUSE5_127_PE9	HBG058130
ENSMUSG00000054611	MOUSE19_5_PE33	HBG058130
ENSMUSG00000063882	MOUSE4_119_PE14	HBG080173
ENSMUSG00000074915	MOUSE2_120_PE17	HBG080173
ENSMUSG00000049092	MOUSE14_45_PE7	HBG060932
ENSMUSG00000075118	MOUSE13_14_PE2	HBG060932
ENSMUSG00000021306	MOUSE13_14_PE9	HBG060932
ENSMUSG00000033684	MOUSE1_160_PE12	HBG065568
ENSMUSG00000036327	MOUSE2_27_PE9	HBG065568
ENSMUSG00000048960	MOUSE1_12_PE1	HBG049281
ENSMUSG00000039621	MOUSE2_169_PE1	HBG049281
ENSMUSG00000055733	MOUSEX_119_PE3	HBG077141
ENSMUSG00000059119	MOUSE7_148_PE4	HBG077141
ENSMUSG00000022294	MOUSE15_40_PE4	HBG077141
ENSMUSG00000044261	MOUSE5_93_PE6	HBG077141
ENSMUSG00000019767	MOUSE10_7_PE1	HBG019531
ENSMUSG00000021056	MOUSE12_79_PE13	HBG019531
ENSMUSG00000028309	MOUSE4_51_PE9	HBG056670
ENSMUSG00000030816	MOUSE7_131_PE56	HBG056670
ENSMUSG00000069257	MOUSE7_111_PE18	HBG067620
ENSMUSG00000059833	MOUSE18_36_PE2	HBG067620
ENSMUSG00000057599	MOUSE1_66_PE9	HBG067620
ENSMUSG00000057359	MOUSE1_43_PE3	HBG067620
ENSMUSG00000058157	MOUSE3_126_PE4	HBG067620
ENSMUSG00000071866	MOUSE11_7_PE14	HBG067620
ENSMUSG00000059583	MOUSE2_52_PE2	HBG067620
ENSMUSG00000062933	MOUSE9_100_PE9	HBG067620
ENSMUSG00000058050	MOUSE7_124_PE26	HBG067620
ENSMUSG00000055795	MOUSE18_15_PE2	HBG067620
ENSMUSG00000057990	MOUSE5_96_PE1	HBG067620
ENSMUSG00000066758	MOUSE7_18_PE3	HBG067620
ENSMUSG00000056963	MOUSE1_19_PE1	HBG067620
ENSMUSG00000021868	MOUSE14_25_PE5	HBG067620
ENSMUSG00000074637	MOUSE3_36_PE7	HBG046111
ENSMUSG00000041287	MOUSE11_72_PE54	HBG046111
ENSMUSG00000022052	MOUSE14_67_PE17	HBG008071
ENSMUSG00000041769	MOUSE7_143_PE3	HBG008071
ENSMUSG00000029681	MOUSE5_140_PE27	HBG056443
ENSMUSG00000029438	MOUSE5_127_PE29	HBG056443
ENSMUSG00000040242	MOUSE6_147_PE4	HBG023827
ENSMUSG00000027854	MOUSE3_106_PE5	HBG023827
ENSMUSG00000067869	MOUSE15_94_PE8	HBG058400
ENSMUSG00000033813	MOUSE1_5_PE6	HBG058400
ENSMUSG00000001604	MOUSE4_140_PE2	HBG058400
ENSMUSG00000024270	MOUSE18_26_PE4	HBG076243
ENSMUSG00000025986	MOUSE1_49_PE3	HBG076243
ENSMUSG00000063354	MOUSE15_80_PE9	HBG076243
ENSMUSG00000036949	MOUSE2_15_PE4	HBG076243
ENSMUSG00000022094	MOUSE14_71_PE3	HBG076243
ENSMUSG00000053897	MOUSE3_139_PE12	HBG076243
ENSMUSG00000026641	MOUSE1_177_PE37	HBG021148
ENSMUSG00000058239	MOUSE7_32_PE2	HBG021148
ENSMUSG00000024158	MOUSE17_26_PE56	HBG003809
ENSMUSG00000061046	MOUSE17_27_PE33	HBG003809
ENSMUSG00000039936	MOUSE4_153_PE9	HBG024160
ENSMUSG00000032462	MOUSE9_102_PE14	HBG024160
ENSMUSG00000032475	MOUSE9_104_PE3	HBG009982
ENSMUSG00000066877	MOUSE1_45_PE12	HBG009982
ENSMUSG00000043001	MOUSE7_61_PE2	HBG009982
ENSMUSG00000042808	MOUSE12_80_PE7	HBG025720
ENSMUSG00000063856	MOUSE9_112_PE52	HBG025720
ENSMUSG00000028469	MOUSE4_45_PE9	HBG038034
ENSMUSG00000027931	MOUSE3_93_PE34	HBG038034
ENSMUSG00000027971	MOUSE3_129_PE1	HBG056836
ENSMUSG00000027977	MOUSE3_127_PE2	HBG056836
ENSMUSG00000039308	MOUSE14_20_PE33	HBG056836
ENSMUSG00000059647	MOUSE1_61_PE12	HBG025341
ENSMUSG00000071294	MOUSE13_70_PE3	HBG025341
ENSMUSG00000074839	MOUSE13_69_PE2	HBG025341
ENSMUSG00000074841	MOUSE13_68_PE16	HBG025341
ENSMUSG00000074843	MOUSE13_68_PE14	HBG025341
ENSMUSG00000057886	MOUSE14_74_PE10	HBG025341
ENSMUSG00000029836	MOUSE6_52_PE6	HBG025341
ENSMUSG00000018666	MOUSE11_99_PE33	HBG025341
ENSMUSG00000037933	MOUSE13_51_PE16	HBG024501
ENSMUSG00000003452	MOUSE6_150_PE10	HBG024501
ENSMUSG00000006273	MOUSE8_73_PE7	HBG001276
ENSMUSG00000006269	MOUSE6_82_PE44	HBG001276
ENSMUSG00000039953	MOUSE4_153_PE7	HBG005368
ENSMUSG00000032452	MOUSE9_101_PE2	HBG005368
ENSMUSG00000015053	MOUSE6_87_PE21	HBG041887
ENSMUSG00000015619	MOUSE2_10_PE1	HBG041887
ENSMUSG00000005836	MOUSE18_12_PE1	HBG041887
ENSMUSG00000015627	MOUSE2_183_PE9	HBG041887
ENSMUSG00000028194	MOUSE3_150_PE1	HBG043951
ENSMUSG00000007039	MOUSE17_37_PE36	HBG043951
ENSMUSG00000029171	MOUSE5_66_PE6	HBG003371
ENSMUSG00000030729	MOUSE7_103_PE22	HBG003371
ENSMUSG00000035560	MOUSE12_68_PE12	HBG021134
ENSMUSG00000030410	MOUSE7_19_PE21	HBG021134
ENSMUSG00000024503	MOUSE18_46_PE1	HBG079849
ENSMUSG00000053030	MOUSE5_81_PE14	HBG079849
ENSMUSG00000022510	MOUSE16_27_PE3	HBG046453
ENSMUSG00000029026	MOUSE4_157_PE11	HBG046453
ENSMUSG00000039367	MOUSE14_20_PE27	HBG058194
ENSMUSG00000039234	MOUSE3_126_PE12	HBG058194
ENSMUSG00000001052	MOUSE3_134_PE3	HBG058194
ENSMUSG00000036391	MOUSE11_54_PE10	HBG058194
ENSMUSG00000000194	MOUSE2_32_PE13	HBG036996
ENSMUSG00000005823	MOUSE17_60_PE2	HBG036996
ENSMUSG00000026854	MOUSE2_32_PE9	HBG007756
ENSMUSG00000025437	MOUSE3_156_PE14	HBG007756
ENSMUSG00000067370	MOUSE17_36_PE15	HBG089374
ENSMUSG00000075397	MOUSE2_36_PE10	HBG089374
ENSMUSG00000051650	MOUSE11_24_PE1	HBG089374
ENSMUSG00000029431	MOUSE5_127_PE33	HBG089374
ENSMUSG00000002984	MOUSE7_20_PE7	HBG023739
ENSMUSG00000005674	MOUSE1_177_PE19	HBG023739
ENSMUSG00000017412	MOUSE2_53_PE1	HBG058054
ENSMUSG00000057914	MOUSE2_15_PE5	HBG058054
ENSMUSG00000020964	MOUSE12_95_PE9	HBG046593
ENSMUSG00000074764	MOUSE2_142_PE11	HBG046593
ENSMUSG00000018906	MOUSE11_56_PE15	HBG065985
ENSMUSG00000019916	MOUSE10_61_PE7	HBG065985
ENSMUSG00000035232	MOUSEX_90_PE7	HBG002420
ENSMUSG00000019577	MOUSE6_6_PE10	HBG002420
ENSMUSG00000037408	MOUSE1_38_PE11	HBG060456
ENSMUSG00000064105	MOUSE19_48_PE15	HBG060456
ENSMUSG00000000826	MOUSE2_184_PE28	HBG057369
ENSMUSG00000027606	MOUSE3_21_PE1	HBG057369
ENSMUSG00000046330	MOUSE1_74_PE10	HBG060741
ENSMUSG00000062502	MOUSE7_26_PE45	HBG060741
ENSMUSG00000027513	MOUSE2_175_PE10	HBG001706
ENSMUSG00000040618	MOUSE14_56_PE10	HBG001706
ENSMUSG00000002900	MOUSE12_33_PE2	HBG020790
ENSMUSG00000026639	MOUSE1_199_PE11	HBG020790
ENSMUSG00000020886	MOUSE11_73_PE30	HBG071201
ENSMUSG00000022770	MOUSE16_33_PE9	HBG071201
ENSMUSG00000040213	MOUSE3_146_PE14	HBG059668
ENSMUSG00000039648	MOUSE2_31_PE20	HBG059668
ENSMUSG00000023914	MOUSE17_45_PE4	HBG050530
ENSMUSG00000024313	MOUSE18_22_PE14	HBG050530
ENSMUSG00000011752	MOUSE19_43_PE10	HBG061332
ENSMUSG00000069106	MOUSE3_12_PE1	HBG061332
ENSMUSG00000066695	MOUSE7_28_PE15	HBG061332
ENSMUSG00000020475	MOUSE11_6_PE21	HBG061332
ENSMUSG00000027201	MOUSE2_126_PE7	HBG094034
ENSMUSG00000049230	MOUSE3_11_PE2	HBG094034
ENSMUSG00000059208	MOUSE17_35_PE34	HBG094034
ENSMUSG00000022696	MOUSE16_47_PE1	HBG038232
ENSMUSG00000034908	MOUSE9_48_PE10	HBG038232
ENSMUSG00000004347	MOUSE6_57_PE1	HBG031979
ENSMUSG00000059173	MOUSE2_81_PE1	HBG031979
ENSMUSG00000021125	MOUSE12_82_PE12	HBG049603
ENSMUSG00000019987	MOUSE10_26_PE4	HBG049603
ENSMUSG00000032180	MOUSE9_22_PE33	HBG079556
ENSMUSG00000063406	MOUSE5_112_PE3	HBG079556
ENSMUSG00000021484	MOUSE13_57_PE34	HBG008038
ENSMUSG00000001143	MOUSE1_38_PE10	HBG008038
ENSMUSG00000040111	MOUSE9_42_PE22	HBG018918
ENSMUSG00000001248	MOUSE7_32_PE17	HBG018918
ENSMUSG00000022378	MOUSE15_67_PE1	HBG001864
ENSMUSG00000020589	MOUSE12_13_PE2	HBG001864
ENSMUSG00000028212	MOUSE4_12_PE5	HBG021106
ENSMUSG00000002068	MOUSE7_39_PE2	HBG021106
ENSMUSG00000041482	MOUSE18_66_PE4	HBG078467
ENSMUSG00000014444	MOUSE8_128_PE11	HBG078467
ENSMUSG00000038332	MOUSE10_43_PE16	HBG004671
ENSMUSG00000032009	MOUSE9_15_PE1	HBG004671
ENSMUSG00000074553	MOUSE9_7_PE3	HBG038685
ENSMUSG00000019985	MOUSE10_94_PE10	HBG038685
ENSMUSG00000006941	MOUSE9_125_PE2	HBG038685
ENSMUSG00000024575	MOUSE18_64_PE18	HBG087302
ENSMUSG00000024992	MOUSE19_39_PE10	HBG087302
ENSMUSG00000066392	MOUSE12_93_PE1	HBG023159
ENSMUSG00000033768	MOUSE19_7_PE34	HBG023159
ENSMUSG00000020649	MOUSE12_26_PE8	HBG006461
ENSMUSG00000022292	MOUSE15_40_PE1	HBG006461
ENSMUSG00000032050	MOUSE9_54_PE6	HBG088385
ENSMUSG00000031207	MOUSEX_93_PE4	HBG088385
ENSMUSG00000026383	MOUSE1_124_PE3	HBG088385
ENSMUSG00000028434	MOUSE4_59_PE4	HBG088385
ENSMUSG00000049122	MOUSE4_75_PE12	HBG088385
ENSMUSG00000027238	MOUSE2_123_PE19	HBG088385
ENSMUSG00000031898	MOUSE8_111_PE1	HBG004755
ENSMUSG00000053687	MOUSE8_111_PE3	HBG004755
ENSMUSG00000019278	MOUSE8_128_PE38	HBG004755
ENSMUSG00000026849	MOUSE2_32_PE6	HBG019852
ENSMUSG00000026848	MOUSE2_32_PE5	HBG019852
ENSMUSG00000009563	MOUSE2_34_PE8	HBG019852
ENSMUSG00000048039	MOUSE3_91_PE8	HBG023777
ENSMUSG00000030609	MOUSE7_81_PE7	HBG023777
ENSMUSG00000025509	MOUSE7_146_PE8	HBG060030
ENSMUSG00000041653	MOUSE15_87_PE16	HBG060030
ENSMUSG00000018868	MOUSE15_87_PE15	HBG060030
ENSMUSG00000033948	MOUSE4_120_PE12	HBG044399
ENSMUSG00000035671	MOUSE8_89_PE6	HBG044399
ENSMUSG00000018845	MOUSE11_85_PE27	HBG007718
ENSMUSG00000030533	MOUSE7_83_PE14	HBG007718
ENSMUSG00000028931	MOUSE4_156_PE4	HBG067828
ENSMUSG00000018470	MOUSE11_72_PE31	HBG067828
ENSMUSG00000057375	MOUSE4_110_PE18	HBG050365
ENSMUSG00000032182	MOUSE9_22_PE38	HBG050365
ENSMUSG00000021359	MOUSE13_43_PE3	HBG002097
ENSMUSG00000028640	MOUSE2_175_PE3	HBG002097
ENSMUSG00000025935	MOUSE1_15_PE1	HBG005270
ENSMUSG00000044528	MOUSE3_127_PE4	HBG005270
ENSMUSG00000041779	MOUSE1_23_PE1	HBG005270
ENSMUSG00000022263	MOUSE15_29_PE7	HBG088450
ENSMUSG00000061751	MOUSE16_36_PE2	HBG088450
ENSMUSG00000022257	MOUSE15_36_PE2	HBG019794
ENSMUSG00000051336	MOUSE17_18_PE1	HBG019794
ENSMUSG00000020585	MOUSE12_9_PE17	HBG019794
ENSMUSG00000018736	MOUSE11_72_PE1	HBG018212
ENSMUSG00000022678	MOUSE16_15_PE4	HBG018212
ENSMUSG00000047250	MOUSE2_37_PE17	HBG019820
ENSMUSG00000032487	MOUSE1_155_PE1	HBG019820
ENSMUSG00000044641	MOUSE2_170_PE7	HBG021050
ENSMUSG00000005699	MOUSE8_110_PE40	HBG021050
ENSMUSG00000031565	MOUSE8_27_PE15	HBG048888
ENSMUSG00000054252	MOUSE5_36_PE13	HBG048888
ENSMUSG00000030621	MOUSE7_93_PE3	HBG057238
ENSMUSG00000024556	MOUSE18_77_PE4	HBG057238
ENSMUSG00000022807	MOUSE16_35_PE2	HBG023944
ENSMUSG00000040875	MOUSE9_119_PE18	HBG023944
ENSMUSG00000027799	MOUSE3_58_PE1	HBG027049
ENSMUSG00000028080	MOUSE3_89_PE5	HBG027049
ENSMUSG00000028134	MOUSE3_123_PE1	HBG070434
ENSMUSG00000028382	MOUSE4_61_PE12	HBG070434
ENSMUSG00000024095	MOUSE17_83_PE8	HBG070434
ENSMUSG00000015165	MOUSE7_29_PE42	HBG070434
ENSMUSG00000056486	MOUSE2_74_PE15	HBG077398
ENSMUSG00000004633	MOUSE6_55_PE1	HBG077398
ENSMUSG00000032583	MOUSE9_112_PE27	HBG031047
ENSMUSG00000033409	MOUSE8_119_PE1	HBG031047
ENSMUSG00000024233	MOUSE18_5_PE1	HBG004262
ENSMUSG00000053184	MOUSE11_84_PE4	HBG004262
ENSMUSG00000032530	MOUSE9_126_PE5	HBG004262
ENSMUSG00000037167	MOUSEX_21_PE19	HBG004262
ENSMUSG00000040187	MOUSE6_147_PE10	HBG078415
ENSMUSG00000055116	MOUSE7_117_PE1	HBG078415
ENSMUSG00000015522	MOUSE3_98_PE36	HBG078415
ENSMUSG00000015709	MOUSE7_87_PE3	HBG078415
ENSMUSG00000029238	MOUSE5_80_PE8	HBG078415
ENSMUSG00000026077	MOUSE1_41_PE7	HBG078415
ENSMUSG00000004328	MOUSE7_17_PE16	HBG078415
ENSMUSG00000024140	MOUSE17_90_PE8	HBG078415
ENSMUSG00000019913	MOUSE10_52_PE6	HBG078415
ENSMUSG00000062713	MOUSE16_97_PE9	HBG078415
ENSMUSG00000038482	MOUSE8_14_PE26	HBG046072
ENSMUSG00000032411	MOUSE9_100_PE1	HBG046072
ENSMUSG00000020894	MOUSE11_72_PE17	HBG080920
ENSMUSG00000030337	MOUSE6_125_PE51	HBG080920
ENSMUSG00000036707	MOUSE1_89_PE12	HBG060039
ENSMUSG00000021981	MOUSE14_60_PE8	HBG060039
ENSMUSG00000028633	MOUSE4_124_PE4	HBG016403
ENSMUSG00000031360	MOUSEX_159_PE8	HBG016403
ENSMUSG00000029597	MOUSE5_124_PE6	HBG085385
ENSMUSG00000029596	MOUSE5_124_PE5	HBG085385
ENSMUSG00000027829	MOUSE3_68_PE5	HBG049784
ENSMUSG00000029068	MOUSE4_159_PE23	HBG049784
ENSMUSG00000021831	MOUSE14_45_PE9	HBG004437
ENSMUSG00000057069	MOUSE13_14_PE1	HBG004437
ENSMUSG00000041710	MOUSEX_140_PE5	HBG044513
ENSMUSG00000032839	MOUSE9_99_PE6	HBG044513
ENSMUSG00000021541	MOUSE13_59_PE9	HBG044513
ENSMUSG00000031997	MOUSE9_9_PE7	HBG044513
ENSMUSG00000029198	MOUSE5_38_PE15	HBG059666
ENSMUSG00000024580	MOUSE18_64_PE25	HBG059666
ENSMUSG00000027883	MOUSE3_112_PE9	HBG095343
ENSMUSG00000026930	MOUSE2_27_PE12	HBG095343
ENSMUSG00000030102	MOUSE6_108_PE3	HBG005459
ENSMUSG00000030287	MOUSE6_147_PE1	HBG005459
ENSMUSG00000045095	MOUSE6_93_PE1	HBG058269
ENSMUSG00000040003	MOUSE5_20_PE1	HBG058269
ENSMUSG00000027282	MOUSE2_92_PE6	HBG043491
ENSMUSG00000070715	MOUSE5_85_PE1	HBG043491
ENSMUSG00000024012	MOUSE17_31_PE20	HBG043491
ENSMUSG00000021702	MOUSE13_97_PE10	HBG019464
ENSMUSG00000028047	MOUSE3_92_PE22	HBG019464
ENSMUSG00000023885	MOUSE17_16_PE4	HBG019464
ENSMUSG00000040152	MOUSE2_119_PE1	HBG019464
ENSMUSG00000028033	MOUSE1_23_PE10	HBG037646
ENSMUSG00000056258	MOUSE15_69_PE2	HBG037646
ENSMUSG00000016128	MOUSE5_157_PE1	HBG056432
ENSMUSG00000031216	MOUSEX_96_PE2	HBG056432
ENSMUSG00000038886	MOUSE7_83_PE17	HBG007839
ENSMUSG00000024085	MOUSE17_68_PE1	HBG007839
ENSMUSG00000037712	MOUSE14_46_PE1	HBG000440
ENSMUSG00000024965	MOUSE19_8_PE20	HBG000440
ENSMUSG00000041153	MOUSE4_17_PE3	HBG070715
ENSMUSG00000074063	MOUSE8_125_PE2	HBG070715
ENSMUSG00000020902	MOUSE11_71_PE6	HBG021255
ENSMUSG00000036473	MOUSE17_26_PE5	HBG021255
ENSMUSG00000057193	MOUSE9_22_PE28	HBG058583
ENSMUSG00000007034	MOUSE17_37_PE18	HBG058583
ENSMUSG00000039865	MOUSE3_125_PE2	HBG058583
ENSMUSG00000028412	MOUSE4_55_PE3	HBG058583
ENSMUSG00000049365	MOUSE6_5_PE9	HBG002369
ENSMUSG00000062014	MOUSE14_47_PE4	HBG002369
ENSMUSG00000029622	MOUSE5_151_PE2	HBG002540
ENSMUSG00000046993	MOUSEX_57_PE5	HBG002540
ENSMUSG00000029621	MOUSE5_151_PE1	HBG002540
ENSMUSG00000056947	MOUSE3_58_PE2	HBG002932
ENSMUSG00000057777	MOUSE3_89_PE6	HBG002932
ENSMUSG00000033389	MOUSE11_67_PE5	HBG093655
ENSMUSG00000030766	MOUSE7_127_PE5	HBG093655
ENSMUSG00000029151	MOUSE5_33_PE19	HBG069118
ENSMUSG00000022315	MOUSE15_55_PE1	HBG069118
ENSMUSG00000024347	MOUSE18_38_PE2	HBG057884
ENSMUSG00000037126	MOUSE19_47_PE28	HBG057884
ENSMUSG00000054555	MOUSE7_138_PE6	HBG055404
ENSMUSG00000028041	MOUSE3_92_PE33	HBG055404
ENSMUSG00000040537	MOUSE5_9_PE12	HBG055404
ENSMUSG00000025964	MOUSE1_65_PE12	HBG055404
ENSMUSG00000036885	MOUSE3_64_PE3	HBG067817
ENSMUSG00000052921	MOUSE11_72_PE7	HBG067817
ENSMUSG00000031303	MOUSEX_156_PE3	HBG025562
ENSMUSG00000028862	MOUSE4_137_PE4	HBG025562
ENSMUSG00000030881	MOUSE7_109_PE18	HBG006850
ENSMUSG00000074513	MOUSE3_87_PE7	HBG006850
ENSMUSG00000056209	MOUSE19_47_PE7	HBG070018
ENSMUSG00000072953	MOUSE6_84_PE5	HBG070018
ENSMUSG00000047911	MOUSE14_71_PE22	HBG070018
ENSMUSG00000003657	MOUSE8_115_PE14	HBG001048
ENSMUSG00000028222	MOUSE4_16_PE3	HBG001048
ENSMUSG00000051223	MOUSE1_61_PE1	HBG007175
ENSMUSG00000069637	MOUSE13_9_PE1	HBG007175
ENSMUSG00000020547	MOUSE12_38_PE2	HBG007175
ENSMUSG00000028672	MOUSE4_139_PE25	HBG004401
ENSMUSG00000007908	MOUSE9_79_PE9	HBG004401
ENSMUSG00000068740	MOUSE3_111_PE38	HBG023851
ENSMUSG00000023473	MOUSE9_113_PE19	HBG023851
ENSMUSG00000014601	MOUSE3_111_PE4	HBG041742
ENSMUSG00000039629	MOUSE6_31_PE24	HBG041742
ENSMUSG00000031548	MOUSE8_25_PE11	HBG031152
ENSMUSG00000018822	MOUSE19_43_PE27	HBG031152
ENSMUSG00000062995	MOUSE6_10_PE1	HBG019949
ENSMUSG00000026018	MOUSE1_62_PE7	HBG019949
ENSMUSG00000035337	MOUSE9_67_PE7	HBG019070
ENSMUSG00000029223	MOUSE5_69_PE3	HBG019070
ENSMUSG00000028399	MOUSE4_78_PE2	HBG009950
ENSMUSG00000033295	MOUSE4_121_PE19	HBG009950
ENSMUSG00000020798	MOUSE11_75_PE26	HBG095803
ENSMUSG00000040447	MOUSE11_75_PE24	HBG095803
ENSMUSG00000041548	MOUSE5_120_PE5	HBG077376
ENSMUSG00000004951	MOUSE5_141_PE13	HBG077376
ENSMUSG00000047061	MOUSE13_47_PE3	HBG077376
ENSMUSG00000031883	MOUSE8_109_PE18	HBG089282
ENSMUSG00000031373	MOUSEX_160_PE7	HBG089282
ENSMUSG00000025317	MOUSE8_127_PE11	HBG089282
ENSMUSG00000056158	MOUSE11_96_PE1	HBG089282
ENSMUSG00000003273	MOUSE7_47_PE10	HBG089282
ENSMUSG00000031453	MOUSE8_14_PE33	HBG020936
ENSMUSG00000032413	MOUSE9_100_PE5	HBG020936
ENSMUSG00000054423	MOUSE14_12_PE1	HBG013704
ENSMUSG00000017978	MOUSE6_25_PE7	HBG013704
ENSMUSG00000038467	MOUSE2_156_PE23	HBG082367
ENSMUSG00000027536	MOUSE3_11_PE11	HBG082367
ENSMUSG00000024642	MOUSE19_15_PE6	HBG000722
ENSMUSG00000032280	MOUSE9_64_PE2	HBG000722
ENSMUSG00000050295	MOUSE13_33_PE7	HBG044959
ENSMUSG00000046714	MOUSE8_126_PE12	HBG044959
ENSMUSG00000031511	MOUSE8_12_PE14	HBG023662
ENSMUSG00000031133	MOUSEX_55_PE2	HBG023662
ENSMUSG00000036760	MOUSE15_75_PE1	HBG068213
ENSMUSG00000049265	MOUSE5_32_PE17	HBG068213
ENSMUSG00000046410	MOUSE7_30_PE16	HBG068213
ENSMUSG00000033998	MOUSE8_131_PE12	HBG068213
ENSMUSG00000027860	MOUSE3_105_PE10	HBG059411
ENSMUSG00000026556	MOUSE1_178_PE5	HBG059411
ENSMUSG00000027339	MOUSE2_133_PE11	HBG020159
ENSMUSG00000042129	MOUSE6_117_PE2	HBG020159
ENSMUSG00000070366	MOUSE7_133_PE2	HBG005317
ENSMUSG00000031570	MOUSE8_28_PE5	HBG005317
ENSMUSG00000033805	MOUSE5_111_PE3	HBG026405
ENSMUSG00000037577	MOUSE17_34_PE10	HBG026405
ENSMUSG00000029672	MOUSE6_24_PE4	HBG061762
ENSMUSG00000031399	MOUSEX_72_PE23	HBG061762
ENSMUSG00000071680	MOUSEX_138_PE6	HBG001041
ENSMUSG00000064163	MOUSE6_141_PE9	HBG001041
ENSMUSG00000070664	MOUSE4_142_PE12	HBG001041
ENSMUSG00000059159	MOUSE6_53_PE2	HBG001041
ENSMUSG00000070570	MOUSE7_46_PE43	HBG019625
ENSMUSG00000019935	MOUSE10_92_PE12	HBG019625
ENSMUSG00000005360	MOUSE15_9_PE6	HBG088942
ENSMUSG00000008932	MOUSE4_111_PE2	HBG088942
ENSMUSG00000001918	MOUSE7_17_PE3	HBG088942
ENSMUSG00000020142	MOUSE11_21_PE9	HBG088942
ENSMUSG00000066568	MOUSE7_35_PE11	HBG047913
ENSMUSG00000039108	MOUSE2_182_PE7	HBG047913
ENSMUSG00000041351	MOUSE4_141_PE14	HBG028675
ENSMUSG00000038807	MOUSE11_77_PE25	HBG028675
ENSMUSG00000029510	MOUSE5_144_PE4	HBG048156
ENSMUSG00000031119	MOUSEX_49_PE4	HBG048156
ENSMUSG00000034254	MOUSE17_36_PE66	HBG025890
ENSMUSG00000026922	MOUSE2_27_PE32	HBG025890
ENSMUSG00000024220	MOUSE17_30_PE14	HBG054315
ENSMUSG00000061079	MOUSE7_113_PE18	HBG054315
ENSMUSG00000044098	MOUSE3_107_PE14	HBG069049
ENSMUSG00000039968	MOUSE5_21_PE5	HBG069049
ENSMUSG00000060332	MOUSE2_131_PE16	HBG035458
ENSMUSG00000024749	MOUSE19_22_PE2	HBG035458
ENSMUSG00000031775	MOUSE8_99_PE22	HBG051604
ENSMUSG00000024479	MOUSE15_57_PE4	HBG051604
ENSMUSG00000028436	MOUSE4_42_PE19	HBG000142
ENSMUSG00000050926	MOUSEX_41_PE1	HBG000142
ENSMUSG00000045284	MOUSEX_42_PE1	HBG000142
ENSMUSG00000032377	MOUSE9_96_PE2	HBG031791
ENSMUSG00000019461	MOUSE11_73_PE5	HBG031791
ENSMUSG00000063672	MOUSE8_25_PE5	HBG042352
ENSMUSG00000041309	MOUSE7_144_PE3	HBG042352
ENSMUSG00000036867	MOUSE9_67_PE1	HBG014487
ENSMUSG00000025880	MOUSE18_79_PE2	HBG014487
ENSMUSG00000026915	MOUSE2_39_PE10	HBG058967
ENSMUSG00000032178	MOUSE9_22_PE29	HBG058967
ENSMUSG00000048915	MOUSE17_65_PE1	HBG087016
ENSMUSG00000027954	MOUSE3_92_PE29	HBG087016
ENSMUSG00000034342	MOUSE9_46_PE12	HBG065067
ENSMUSG00000022637	MOUSE16_55_PE1	HBG065067
ENSMUSG00000024411	MOUSE18_16_PE5	HBG078312
ENSMUSG00000004655	MOUSE6_56_PE2	HBG078312
ENSMUSG00000028435	MOUSE4_42_PE15	HBG078312
ENSMUSG00000028427	MOUSE4_42_PE14	HBG078312
ENSMUSG00000004530	MOUSE5_118_PE1	HBG078773
ENSMUSG00000030707	MOUSE7_130_PE32	HBG078773
ENSMUSG00000028337	MOUSE4_48_PE4	HBG078773
ENSMUSG00000041729	MOUSE9_65_PE6	HBG078773
ENSMUSG00000021798	MOUSE14_34_PE20	HBG054741
ENSMUSG00000021493	MOUSE13_58_PE10	HBG054741
ENSMUSG00000031636	MOUSE8_48_PE5	HBG054741
ENSMUSG00000055044	MOUSE19_41_PE12	HBG054741
ENSMUSG00000025076	MOUSE19_58_PE6	HBG059271
ENSMUSG00000031628	MOUSE8_49_PE5	HBG059271
ENSMUSG00000026029	MOUSE1_61_PE17	HBG059271
ENSMUSG00000026031	MOUSE1_61_PE15	HBG059271
ENSMUSG00000014353	MOUSE2_130_PE6	HBG019423
ENSMUSG00000033808	MOUSE2_122_PE1	HBG019423
ENSMUSG00000030120	MOUSE6_125_PE33	HBG057122
ENSMUSG00000048416	MOUSE3_69_PE8	HBG057122
ENSMUSG00000063273	MOUSE3_53_PE6	HBG001469
ENSMUSG00000022020	MOUSE14_80_PE7	HBG001469
ENSMUSG00000037286	MOUSE9_104_PE5	HBG021832
ENSMUSG00000036928	MOUSE5_144_PE5	HBG021832
ENSMUSG00000026797	MOUSE2_34_PE12	HBG002352
ENSMUSG00000027882	MOUSE3_112_PE12	HBG002352
ENSMUSG00000051401	MOUSE18_42_PE4	HBG040980
ENSMUSG00000041633	MOUSEX_150_PE1	HBG040980
ENSMUSG00000036225	MOUSE18_16_PE3	HBG040980
ENSMUSG00000030499	MOUSE7_35_PE14	HBG040980
ENSMUSG00000021750	MOUSE14_7_PE13	HBG020117
ENSMUSG00000026655	MOUSE2_4_PE21	HBG020117
ENSMUSG00000062611	MOUSE14_89_PE1	HBG025716
ENSMUSG00000028081	MOUSE3_89_PE4	HBG025716
ENSMUSG00000042914	MOUSE7_96_PE5	HBG025716
ENSMUSG00000040732	MOUSE16_99_PE1	HBG021608
ENSMUSG00000016087	MOUSE9_34_PE5	HBG021608
ENSMUSG00000001924	MOUSEX_21_PE8	HBG057595
ENSMUSG00000069053	MOUSEY_1_PE6	HBG057595
ENSMUSG00000032596	MOUSE9_112_PE33	HBG057595
ENSMUSG00000004567	MOUSE8_4_PE10	HBG024945
ENSMUSG00000011008	MOUSE3_150_PE8	HBG024945
ENSMUSG00000028522	MOUSE4_106_PE5	HBG056472
ENSMUSG00000042570	MOUSE10_82_PE15	HBG056472
ENSMUSG00000029767	MOUSE6_31_PE5	HBG084787
ENSMUSG00000019539	MOUSE7_46_PE35	HBG084787
ENSMUSG00000027404	MOUSE2_131_PE15	HBG049345
ENSMUSG00000000948	MOUSE7_62_PE2	HBG049345
ENSMUSG00000027247	MOUSE2_92_PE48	HBG024620
ENSMUSG00000036106	MOUSE15_88_PE9	HBG024620
ENSMUSG00000020661	MOUSE12_4_PE14	HBG044562
ENSMUSG00000027478	MOUSE2_155_PE18	HBG044562
ENSMUSG00000056124	MOUSE18_22_PE7	HBG060827
ENSMUSG00000017929	MOUSE2_169_PE17	HBG060827
ENSMUSG00000028413	MOUSE4_42_PE7	HBG060827
ENSMUSG00000052423	MOUSE1_177_PE24	HBG060827
ENSMUSG00000039539	MOUSE8_40_PE1	HBG082094
ENSMUSG00000020354	MOUSE11_49_PE6	HBG082094
ENSMUSG00000017639	MOUSE11_82_PE14	HBG050865
ENSMUSG00000037098	MOUSE17_27_PE60	HBG050865
ENSMUSG00000042826	MOUSE11_72_PE72	HBG040956
ENSMUSG00000031137	MOUSEX_57_PE2	HBG040956
ENSMUSG00000028582	MOUSE4_111_PE20	HBG078369
ENSMUSG00000036686	MOUSE8_89_PE2	HBG078369
ENSMUSG00000029534	MOUSE6_19_PE5	HBG050700
ENSMUSG00000045576	MOUSE3_108_PE8	HBG050700
ENSMUSG00000052698	MOUSE9_70_PE12	HBG019489
ENSMUSG00000028465	MOUSE4_45_PE4	HBG019489
ENSMUSG00000037656	MOUSE8_24_PE16	HBG002166
ENSMUSG00000027397	MOUSE2_130_PE15	HBG002166
ENSMUSG00000041731	MOUSE19_25_PE9	HBG025282
ENSMUSG00000025791	MOUSE4_102_PE7	HBG025282
ENSMUSG00000043013	MOUSE9_78_PE2	HBG087011
ENSMUSG00000045991	MOUSE18_67_PE6	HBG087011
ENSMUSG00000031706	MOUSE8_88_PE34	HBG004910
ENSMUSG00000024206	MOUSE17_59_PE28	HBG004910
ENSMUSG00000045594	MOUSE9_119_PE2	HBG077267
ENSMUSG00000026200	MOUSE1_77_PE21	HBG077267
ENSMUSG00000031558	MOUSE5_50_PE1	HBG056924
ENSMUSG00000025020	MOUSE19_43_PE6	HBG056924
ENSMUSG00000030074	MOUSE6_100_PE4	HBG010004
ENSMUSG00000036197	MOUSE15_97_PE1	HBG010004
ENSMUSG00000045229	MOUSE4_12_PE13	HBG010004
ENSMUSG00000020038	MOUSE10_88_PE10	HBG000137
ENSMUSG00000068742	MOUSE2_93_PE22	HBG000137
ENSMUSG00000020042	MOUSE10_88_PE12	HBG008738
ENSMUSG00000032724	MOUSE2_105_PE1	HBG008738
ENSMUSG00000024597	MOUSE18_60_PE5	HBG011879
ENSMUSG00000031766	MOUSE8_99_PE11	HBG011879
ENSMUSG00000045856	MOUSE5_93_PE1	HBG070568
ENSMUSG00000029922	MOUSE6_41_PE10	HBG070568
ENSMUSG00000070527	MOUSE7_64_PE5	HBG070568
ENSMUSG00000029410	MOUSE5_96_PE13	HBG024776
ENSMUSG00000062168	MOUSEX_157_PE1	HBG024776
ENSMUSG00000015759	MOUSE14_47_PE3	HBG009490
ENSMUSG00000024873	MOUSE19_6_PE8	HBG009490
ENSMUSG00000024483	MOUSE18_38_PE11	HBG017412
ENSMUSG00000055204	MOUSE5_94_PE4	HBG017412
ENSMUSG00000039470	MOUSE8_42_PE5	HBG060209
ENSMUSG00000033906	MOUSEX_101_PE8	HBG060209
ENSMUSG00000008763	MOUSE3_104_PE1	HBG060427
ENSMUSG00000003746	MOUSE10_56_PE3	HBG060427
ENSMUSG00000034308	MOUSE8_123_PE5	HBG025988
ENSMUSG00000035077	MOUSE7_124_PE18	HBG025988
ENSMUSG00000046689	MOUSE3_18_PE1	HBG002278
ENSMUSG00000039105	MOUSE4_65_PE14	HBG002278
ENSMUSG00000075368	MOUSE2_41_PE1	HBG002278
ENSMUSG00000026394	MOUSE1_143_PE4	HBG002278
ENSMUSG00000048582	MOUSE14_57_PE20	HBG089565
ENSMUSG00000068615	MOUSE2_115_PE7	HBG089565
ENSMUSG00000052310	MOUSE3_93_PE23	HBG057247
ENSMUSG00000058850	MOUSE2_31_PE16	HBG057247
ENSMUSG00000072572	MOUSE14_52_PE11	HBG057247
ENSMUSG00000008226	MOUSE2_74_PE9	HBG068377
ENSMUSG00000019124	MOUSE6_55_PE7	HBG068377
ENSMUSG00000057378	MOUSE2_114_PE4	HBG005612
ENSMUSG00000021313	MOUSE13_13_PE1	HBG005612
ENSMUSG00000058297	MOUSE10_62_PE8	HBG014276
ENSMUSG00000056222	MOUSE13_60_PE2	HBG014276
ENSMUSG00000009350	MOUSE11_90_PE34	HBG082746
ENSMUSG00000052234	MOUSE11_90_PE37	HBG082746
ENSMUSG00000009356	MOUSE11_90_PE35	HBG082746
ENSMUSG00000020673	MOUSE12_31_PE4	HBG082746
ENSMUSG00000030127	MOUSE6_125_PE34	HBG060852
ENSMUSG00000026240	MOUSE1_90_PE15	HBG060852
ENSMUSG00000024130	MOUSE17_26_PE10	HBG063292
ENSMUSG00000035435	MOUSE17_26_PE9	HBG063292
ENSMUSG00000062017	MOUSE7_124_PE5	HBG063292
ENSMUSG00000054746	MOUSE7_124_PE8	HBG063292
ENSMUSG00000051900	MOUSE7_124_PE10	HBG063292
ENSMUSG00000015243	MOUSE4_55_PE1	HBG063292
ENSMUSG00000028125	MOUSE3_125_PE10	HBG063292
ENSMUSG00000030082	MOUSE6_87_PE29	HBG022251
ENSMUSG00000025816	MOUSE2_6_PE8	HBG022251
ENSMUSG00000005656	MOUSE12_57_PE7	HBG081812
ENSMUSG00000027423	MOUSE2_145_PE11	HBG081812
ENSMUSG00000042686	MOUSE1_18_PE10	HBG082114
ENSMUSG00000017817	MOUSE2_165_PE10	HBG082114
ENSMUSG00000047213	MOUSE3_17_PE2	HBG020356
ENSMUSG00000040025	MOUSE4_135_PE15	HBG020356
ENSMUSG00000018593	MOUSE11_57_PE21	HBG043059
ENSMUSG00000029309	MOUSE5_107_PE14	HBG043059
ENSMUSG00000038910	MOUSE17_53_PE1	HBG092268
ENSMUSG00000038349	MOUSE1_58_PE3	HBG092268
ENSMUSG00000010660	MOUSE9_123_PE9	HBG092268
ENSMUSG00000026173	MOUSE1_76_PE21	HBG092268
ENSMUSG00000051177	MOUSE2_137_PE1	HBG092268
ENSMUSG00000040061	MOUSE2_120_PE6	HBG092268
ENSMUSG00000026414	MOUSE1_140_PE19	HBG038625
ENSMUSG00000064179	MOUSE7_5_PE5	HBG038625
ENSMUSG00000026880	MOUSE2_36_PE23	HBG059746
ENSMUSG00000027744	MOUSE3_55_PE9	HBG059746
ENSMUSG00000001507	MOUSE11_98_PE12	HBG020119
ENSMUSG00000027111	MOUSE2_72_PE18	HBG020119
ENSMUSG00000022092	MOUSE14_70_PE24	HBG039372
ENSMUSG00000021816	MOUSE14_20_PE20	HBG039372
ENSMUSG00000032265	MOUSE9_88_PE3	HBG005736
ENSMUSG00000044468	MOUSE3_103_PE6	HBG005736
ENSMUSG00000008604	MOUSE3_91_PE42	HBG068599
ENSMUSG00000050148	MOUSEX_149_PE10	HBG068599
ENSMUSG00000005893	MOUSE6_91_PE13	HBG050305
ENSMUSG00000005897	MOUSE10_97_PE5	HBG050305
ENSMUSG00000029361	MOUSE5_122_PE1	HBG067899
ENSMUSG00000028978	MOUSE5_25_PE11	HBG067899
ENSMUSG00000035199	MOUSE6_97_PE6	HBG078809
ENSMUSG00000031149	MOUSEX_7_PE19	HBG078809
ENSMUSG00000043545	MOUSE7_43_PE4	HBG057019
ENSMUSG00000045634	MOUSE4_122_PE18	HBG057019
ENSMUSG00000032218	MOUSE9_73_PE9	HBG057019
ENSMUSG00000027793	MOUSE3_57_PE9	HBG057019
ENSMUSG00000027715	MOUSE3_38_PE12	HBG057019
ENSMUSG00000021991	MOUSE14_29_PE1	HBG024582
ENSMUSG00000041460	MOUSE6_119_PE4	HBG024582
ENSMUSG00000025958	MOUSE1_66_PE10	HBG067562
ENSMUSG00000063889	MOUSE18_4_PE3	HBG067562
ENSMUSG00000026670	MOUSE1_176_PE4	HBG031029
ENSMUSG00000026956	MOUSE2_26_PE31	HBG031029
ENSMUSG00000022463	MOUSE15_85_PE35	HBG004385
ENSMUSG00000020538	MOUSE11_62_PE26	HBG004385
ENSMUSG00000040860	MOUSE4_145_PE5	HBG024016
ENSMUSG00000073612	MOUSE1_97_PE26	HBG024016
ENSMUSG00000028706	MOUSE4_119_PE12	HBG049112
ENSMUSG00000050312	MOUSE16_66_PE2	HBG049112
ENSMUSG00000029188	MOUSE5_55_PE9	HBG060602
ENSMUSG00000021490	MOUSE13_58_PE1	HBG060602
ENSMUSG00000031290	MOUSEX_143_PE4	HBG038524
ENSMUSG00000029720	MOUSE5_143_PE19	HBG038524
ENSMUSG00000026750	MOUSE2_40_PE3	HBG005341
ENSMUSG00000031897	MOUSE8_110_PE55	HBG005341
ENSMUSG00000020954	MOUSE12_53_PE7	HBG009326
ENSMUSG00000024077	MOUSE17_82_PE3	HBG009326
ENSMUSG00000033721	MOUSE3_113_PE1	HBG044044
ENSMUSG00000009621	MOUSE2_28_PE19	HBG044044
ENSMUSG00000037032	MOUSE7_109_PE14	HBG026821
ENSMUSG00000029207	MOUSE5_69_PE2	HBG026821
ENSMUSG00000056476	MOUSE3_61_PE10	HBG050408
ENSMUSG00000031302	MOUSEX_98_PE12	HBG050408
ENSMUSG00000032503	MOUSE9_116_PE4	HBG058903
ENSMUSG00000056211	MOUSE1_133_PE7	HBG058903
ENSMUSG00000025764	MOUSE3_43_PE16	HBG037320
ENSMUSG00000037315	MOUSEX_21_PE1	HBG037320
ENSMUSG00000020866	MOUSE11_97_PE22	HBG037278
ENSMUSG00000024112	MOUSE17_27_PE18	HBG037278
ENSMUSG00000042873	MOUSE6_113_PE6	HBG024149
ENSMUSG00000062252	MOUSE17_30_PE29	HBG024149
ENSMUSG00000027763	MOUSE3_63_PE1	HBG023523
ENSMUSG00000036109	MOUSEX_48_PE6	HBG023523
ENSMUSG00000025223	MOUSE19_47_PE20	HBG006228
ENSMUSG00000039706	MOUSE5_47_PE2	HBG006228
ENSMUSG00000020986	MOUSE12_62_PE1	HBG002491
ENSMUSG00000027429	MOUSE2_146_PE8	HBG002491
ENSMUSG00000050860	MOUSE11_98_PE28	HBG021424
ENSMUSG00000027088	MOUSE2_70_PE15	HBG021424
ENSMUSG00000055319	MOUSE7_132_PE41	HBG013333
ENSMUSG00000061313	MOUSE8_28_PE7	HBG013333
ENSMUSG00000040818	MOUSE14_26_PE19	HBG056598
ENSMUSG00000015377	MOUSE15_92_PE22	HBG056598
ENSMUSG00000032374	MOUSE9_96_PE3	HBG059215
ENSMUSG00000004846	MOUSE5_142_PE10	HBG059215
ENSMUSG00000028698	MOUSE4_119_PE23	HBG058455
ENSMUSG00000031834	MOUSE8_75_PE23	HBG058455
ENSMUSG00000062694	MOUSE6_112_PE7	HBG049326
ENSMUSG00000007655	MOUSE6_19_PE2	HBG049326
ENSMUSG00000033872	MOUSE4_120_PE22	HBG069140
ENSMUSG00000037418	MOUSE19_11_PE4	HBG069140
ENSMUSG00000041070	MOUSE11_73_PE15	HBG005604
ENSMUSG00000043618	MOUSE5_94_PE2	HBG005604
ENSMUSG00000050192	MOUSE3_30_PE5	HBG005604
ENSMUSG00000031442	MOUSE8_14_PE3	HBG056411
ENSMUSG00000031139	MOUSEX_58_PE3	HBG056411
ENSMUSG00000028776	MOUSE4_134_PE9	HBG057984
ENSMUSG00000032357	MOUSE9_80_PE3	HBG057984
ENSMUSG00000031666	MOUSE8_96_PE1	HBG016243
ENSMUSG00000027641	MOUSE2_159_PE9	HBG016243
ENSMUSG00000025630	MOUSEX_50_PE6	HBG020101
ENSMUSG00000075513	MOUSE2_22_PE3	HBG020101
ENSMUSG00000005686	MOUSE7_114_PE5	HBG010522
ENSMUSG00000070385	MOUSE3_106_PE10	HBG010522
ENSMUSG00000070934	MOUSE4_88_PE5	HBG002395
ENSMUSG00000041658	MOUSEX_149_PE7	HBG002395
ENSMUSG00000035152	MOUSE11_86_PE11	HBG071490
ENSMUSG00000009090	MOUSE11_5_PE33	HBG071490
ENSMUSG00000021686	MOUSE13_99_PE5	HBG071490
ENSMUSG00000062444	MOUSE7_84_PE8	HBG071490
ENSMUSG00000020109	MOUSE10_62_PE4	HBG078137
ENSMUSG00000059332	MOUSE3_141_PE8	HBG078137
ENSMUSG00000039826	MOUSE2_30_PE21	HBG019847
ENSMUSG00000025086	MOUSE19_59_PE5	HBG019847
ENSMUSG00000022286	MOUSE15_39_PE4	HBG057134
ENSMUSG00000037188	MOUSE4_139_PE12	HBG057134
ENSMUSG00000024527	MOUSE18_70_PE9	HBG039595
ENSMUSG00000031967	MOUSE8_129_PE11	HBG039595
ENSMUSG00000020532	MOUSE11_87_PE8	HBG077887
ENSMUSG00000058615	MOUSE12_11_PE1	HBG077887
ENSMUSG00000042010	MOUSE5_118_PE9	HBG077887
ENSMUSG00000025724	MOUSE7_83_PE31	HBG007466
ENSMUSG00000024516	MOUSE18_69_PE3	HBG007466
ENSMUSG00000035890	MOUSE10_82_PE30	HBG088265
ENSMUSG00000028098	MOUSE3_100_PE2	HBG088265
ENSMUSG00000028565	MOUSE4_100_PE2	HBG085023
ENSMUSG00000055053	MOUSE10_84_PE40	HBG085023
ENSMUSG00000015575	MOUSE17_28_PE16	HBG059847
ENSMUSG00000039347	MOUSE6_49_PE7	HBG059847
ENSMUSG00000039982	MOUSE19_13_PE24	HBG058503
ENSMUSG00000004947	MOUSE5_141_PE17	HBG058503
ENSMUSG00000049076	MOUSE16_33_PE1	HBG059343
ENSMUSG00000001588	MOUSE11_73_PE9	HBG059343
ENSMUSG00000022788	MOUSE16_17_PE9	HBG026386
ENSMUSG00000025265	MOUSEX_147_PE4	HBG026386
ENSMUSG00000028645	MOUSE4_122_PE24	HBG072011
ENSMUSG00000027690	MOUSE3_30_PE3	HBG072011
ENSMUSG00000027661	MOUSE2_167_PE41	HBG072011
ENSMUSG00000037490	MOUSE10_23_PE12	HBG072011
ENSMUSG00000026791	MOUSE2_34_PE16	HBG072011
ENSMUSG00000036067	MOUSE2_28_PE10	HBG072011
ENSMUSG00000037833	MOUSE14_41_PE2	HBG060216
ENSMUSG00000053886	MOUSE8_72_PE13	HBG060216
ENSMUSG00000031681	MOUSE8_84_PE3	HBG047594
ENSMUSG00000027796	MOUSE3_57_PE6	HBG047594
ENSMUSG00000029406	MOUSE5_128_PE17	HBG002498
ENSMUSG00000024851	MOUSE19_5_PE11	HBG002498
ENSMUSG00000049148	MOUSE15_5_PE3	HBG077271
ENSMUSG00000064247	MOUSE5_114_PE1	HBG077271
ENSMUSG00000062234	MOUSE5_112_PE16	HBG057804
ENSMUSG00000028528	MOUSE4_104_PE4	HBG057804
ENSMUSG00000019433	MOUSE8_88_PE14	HBG005023
ENSMUSG00000034872	MOUSE10_84_PE33	HBG005023
ENSMUSG00000025959	MOUSE1_66_PE8	HBG023378
ENSMUSG00000000078	MOUSE13_6_PE2	HBG023378
ENSMUSG00000011034	MOUSE5_35_PE13	HBG092732
ENSMUSG00000020226	MOUSE10_79_PE10	HBG092732
ENSMUSG00000020229	MOUSE10_79_PE12	HBG092732
ENSMUSG00000042371	MOUSE11_64_PE4	HBG092732
ENSMUSG00000051335	MOUSE13_45_PE5	HBG001404
ENSMUSG00000013150	MOUSE8_110_PE44	HBG001404
ENSMUSG00000048911	MOUSE2_133_PE3	HBG037909
ENSMUSG00000039328	MOUSE8_33_PE2	HBG037909
ENSMUSG00000053730	MOUSE4_133_PE36	HBG032582
ENSMUSG00000002845	MOUSE16_40_PE16	HBG032582
ENSMUSG00000040560	MOUSE18_67_PE2	HBG057878
ENSMUSG00000044976	MOUSE9_77_PE4	HBG057878
ENSMUSG00000028551	MOUSE4_112_PE14	HBG037329
ENSMUSG00000073802	MOUSE4_91_PE24	HBG037329
ENSMUSG00000003033	MOUSE8_76_PE50	HBG083976
ENSMUSG00000003309	MOUSE9_22_PE26	HBG083976
ENSMUSG00000021824	MOUSE14_21_PE3	HBG083976
ENSMUSG00000031539	MOUSE8_24_PE23	HBG083976
ENSMUSG00000035284	MOUSE9_71_PE3	HBG020670
ENSMUSG00000046230	MOUSE19_17_PE6	HBG020670
ENSMUSG00000038773	MOUSE18_37_PE2	HBG025076
ENSMUSG00000053470	MOUSE6_70_PE20	HBG025076
ENSMUSG00000001225	MOUSE12_33_PE5	HBG039543
ENSMUSG00000036196	MOUSE17_30_PE31	HBG039543
ENSMUSG00000018770	MOUSE2_74_PE21	HBG087234
ENSMUSG00000006057	MOUSE11_99_PE8	HBG087234
ENSMUSG00000057933	MOUSE9_81_PE18	HBG074621
ENSMUSG00000074179	MOUSE9_81_PE14	HBG074621
ENSMUSG00000074181	MOUSE9_81_PE13	HBG074621
ENSMUSG00000074183	MOUSE9_81_PE12	HBG074621
ENSMUSG00000025934	MOUSE1_23_PE4	HBG074621
ENSMUSG00000025936	MOUSE1_23_PE6	HBG074621
ENSMUSG00000032348	MOUSE9_81_PE11	HBG074621
ENSMUSG00000009741	MOUSE9_118_PE7	HBG058150
ENSMUSG00000026380	MOUSE1_123_PE8	HBG058150
ENSMUSG00000026458	MOUSE1_139_PE7	HBG057443
ENSMUSG00000003863	MOUSE7_46_PE59	HBG057443
ENSMUSG00000020448	MOUSE11_4_PE26	HBG059371
ENSMUSG00000015478	MOUSE17_36_PE65	HBG059371
ENSMUSG00000027368	MOUSE2_129_PE4	HBG058531
ENSMUSG00000031530	MOUSE8_37_PE1	HBG058531
ENSMUSG00000031383	MOUSEX_71_PE24	HBG058531
ENSMUSG00000053716	MOUSE9_110_PE18	HBG058531
ENSMUSG00000032226	MOUSE9_73_PE5	HBG068205
ENSMUSG00000038843	MOUSE19_18_PE8	HBG068205
ENSMUSG00000028240	MOUSE4_7_PE2	HBG086104
ENSMUSG00000039519	MOUSE3_19_PE5	HBG086104
ENSMUSG00000022377	MOUSE15_67_PE2	HBG057335
ENSMUSG00000052632	MOUSE12_22_PE6	HBG057335
ENSMUSG00000025215	MOUSE19_46_PE20	HBG019634
ENSMUSG00000040610	MOUSE11_34_PE14	HBG019634
ENSMUSG00000060671	MOUSE3_93_PE5	HBG077244
ENSMUSG00000060131	MOUSE2_128_PE1	HBG077244
ENSMUSG00000037685	MOUSE5_70_PE5	HBG077244
ENSMUSG00000021983	MOUSE14_60_PE12	HBG077244
ENSMUSG00000025324	MOUSE7_61_PE1	HBG077244
ENSMUSG00000055415	MOUSE11_45_PE3	HBG077244
ENSMUSG00000062949	MOUSEX_58_PE6	HBG077244
ENSMUSG00000037400	MOUSE3_38_PE1	HBG077244
ENSMUSG00000027546	MOUSE2_171_PE6	HBG077244
ENSMUSG00000024566	MOUSE18_85_PE1	HBG077244
ENSMUSG00000030257	MOUSE6_113_PE4	HBG005259
ENSMUSG00000031389	MOUSEX_71_PE40	HBG005259
ENSMUSG00000031016	MOUSE7_113_PE20	HBG009548
ENSMUSG00000037159	MOUSE6_42_PE5	HBG009548
ENSMUSG00000063077	MOUSE4_152_PE23	HBG000610
ENSMUSG00000014602	MOUSE1_97_PE22	HBG000610
ENSMUSG00000033444	MOUSE10_78_PE7	HBG053521
ENSMUSG00000042331	MOUSE11_64_PE14	HBG053521
ENSMUSG00000027340	MOUSE2_133_PE12	HBG069058
ENSMUSG00000024354	MOUSE18_37_PE15	HBG069058
ENSMUSG00000022240	MOUSE15_32_PE1	HBG084775
ENSMUSG00000026991	MOUSE2_59_PE7	HBG084775
ENSMUSG00000034101	MOUSE2_85_PE14	HBG084775
ENSMUSG00000000325	MOUSE16_19_PE26	HBG084775
ENSMUSG00000032405	MOUSE9_66_PE2	HBG047743
ENSMUSG00000004934	MOUSE10_84_PE16	HBG047743
ENSMUSG00000061731	MOUSE15_56_PE1	HBG005644
ENSMUSG00000028838	MOUSE4_138_PE9	HBG005644
ENSMUSG00000074396	MOUSE3_99_PE48	HBG009534
ENSMUSG00000030545	MOUSE7_82_PE19	HBG009534
ENSMUSG00000020642	MOUSE12_28_PE1	HBG046214
ENSMUSG00000038068	MOUSE13_49_PE12	HBG046214
ENSMUSG00000027221	MOUSE2_93_PE25	HBG055232
ENSMUSG00000057337	MOUSE10_62_PE9	HBG055232
ENSMUSG00000015733	MOUSE6_19_PE4	HBG006178
ENSMUSG00000067017	MOUSE19_39_PE1	HBG006178
ENSMUSG00000074348	MOUSE3_108_PE7	HBG006178
ENSMUSG00000055357	MOUSEX_166_PE2	HBG006178
ENSMUSG00000024539	MOUSE18_71_PE1	HBG087049
ENSMUSG00000027540	MOUSE2_170_PE5	HBG087049
ENSMUSG00000030854	MOUSE7_48_PE24	HBG087049
ENSMUSG00000031506	MOUSE1_139_PE27	HBG087049
ENSMUSG00000035429	MOUSE7_5_PE10	HBG087049
ENSMUSG00000025314	MOUSE2_91_PE24	HBG087049
ENSMUSG00000075060	MOUSE2_91_PE22	HBG087049
ENSMUSG00000037815	MOUSE18_37_PE9	HBG023021
ENSMUSG00000060843	MOUSE10_66_PE1	HBG023021
ENSMUSG00000006586	MOUSE4_14_PE1	HBG059956
ENSMUSG00000038533	MOUSE2_156_PE14	HBG059956
ENSMUSG00000023845	MOUSE17_19_PE7	HBG005692
ENSMUSG00000021583	MOUSE13_78_PE1	HBG005692
ENSMUSG00000022012	MOUSE14_78_PE5	HBG008636
ENSMUSG00000031109	MOUSEX_46_PE11	HBG008636
ENSMUSG00000002475	MOUSE18_11_PE11	HBG004546
ENSMUSG00000006638	MOUSE5_33_PE10	HBG004546
ENSMUSG00000038623	MOUSE7_84_PE21	HBG052293
ENSMUSG00000036151	MOUSE8_74_PE27	HBG052293
ENSMUSG00000001774	MOUSE9_19_PE2	HBG002193
ENSMUSG00000031312	MOUSEX_98_PE18	HBG002193
ENSMUSG00000027602	MOUSE2_157_PE8	HBG002255
ENSMUSG00000062081	MOUSE14_48_PE8	HBG002255
ENSMUSG00000074501	MOUSE9_19_PE5	HBG002255
ENSMUSG00000031812	MOUSE8_127_PE4	HBG002255
ENSMUSG00000057157	MOUSE5_153_PE9	HBG002255
ENSMUSG00000007564	MOUSE17_22_PE15	HBG002142
ENSMUSG00000032058	MOUSE9_53_PE22	HBG002142
ENSMUSG00000034574	MOUSE12_75_PE1	HBG096093
ENSMUSG00000040260	MOUSE17_51_PE4	HBG096093
ENSMUSG00000034480	MOUSEX_126_PE1	HBG096093
ENSMUSG00000022021	MOUSE14_88_PE1	HBG096093
ENSMUSG00000031078	MOUSE7_149_PE1	HBG057391
ENSMUSG00000022831	MOUSE16_39_PE9	HBG057391
ENSMUSG00000037974	MOUSE7_146_PE23	HBG096423
ENSMUSG00000048191	MOUSE7_146_PE19	HBG096423
ENSMUSG00000036833	MOUSE2_26_PE5	HBG029603
ENSMUSG00000004565	MOUSE8_4_PE11	HBG029603
ENSMUSG00000024286	MOUSE18_10_PE3	HBG061128
ENSMUSG00000070871	MOUSE1_67_PE1	HBG061128
ENSMUSG00000023272	MOUSE15_92_PE6	HBG076148
ENSMUSG00000030284	MOUSE6_113_PE30	HBG076148
ENSMUSG00000006906	MOUSE6_82_PE40	HBG001753
ENSMUSG00000024776	MOUSE19_35_PE7	HBG001753
ENSMUSG00000054446	MOUSE6_32_PE15	HBG057218
ENSMUSG00000039070	MOUSE6_32_PE13	HBG057218
ENSMUSG00000035901	MOUSE7_113_PE13	HBG038028
ENSMUSG00000030313	MOUSE6_150_PE1	HBG038028
ENSMUSG00000040268	MOUSE7_135_PE1	HBG071950
ENSMUSG00000031557	MOUSE8_27_PE11	HBG071950
ENSMUSG00000031708	MOUSE8_88_PE12	HBG003311
ENSMUSG00000049537	MOUSE5_87_PE1	HBG003311
ENSMUSG00000021708	MOUSE13_96_PE2	HBG081754
ENSMUSG00000032356	MOUSE9_93_PE4	HBG081754
ENSMUSG00000048118	MOUSE12_74_PE5	HBG023082
ENSMUSG00000039219	MOUSE13_15_PE7	HBG023082
ENSMUSG00000068699	MOUSE6_31_PE10	HBG003931
ENSMUSG00000031328	MOUSEX_72_PE6	HBG003931
ENSMUSG00000024750	MOUSE19_22_PE3	HBG059137
ENSMUSG00000030629	MOUSE7_87_PE5	HBG059137
ENSMUSG00000074794	MOUSE13_84_PE1	HBG058777
ENSMUSG00000002910	MOUSE8_75_PE29	HBG058777
ENSMUSG00000026490	MOUSE1_186_PE3	HBG025791
ENSMUSG00000024769	MOUSE19_7_PE26	HBG025791
ENSMUSG00000057649	MOUSE13_77_PE14	HBG026123
ENSMUSG00000031660	MOUSE8_93_PE12	HBG026123
ENSMUSG00000031688	MOUSE8_83_PE2	HBG094956
ENSMUSG00000024497	MOUSE18_44_PE11	HBG094956
ENSMUSG00000032015	MOUSE9_45_PE5	HBG094956
ENSMUSG00000026565	MOUSE1_172_PE1	HBG094956
ENSMUSG00000027634	MOUSE2_159_PE2	HBG078788
ENSMUSG00000036564	MOUSE8_100_PE23	HBG078788
ENSMUSG00000032601	MOUSE9_113_PE12	HBG003653
ENSMUSG00000002997	MOUSE12_33_PE18	HBG003653
ENSMUSG00000036390	MOUSE6_67_PE8	HBG023896
ENSMUSG00000021453	MOUSE13_54_PE6	HBG023896
ENSMUSG00000039089	MOUSE10_27_PE6	HBG020256
ENSMUSG00000035576	MOUSE2_165_PE3	HBG020256
ENSMUSG00000007097	MOUSE1_178_PE22	HBG032080
ENSMUSG00000022229	MOUSE14_57_PE4	HBG032080
ENSMUSG00000032570	MOUSE9_109_PE9	HBG032080
ENSMUSG00000034112	MOUSE8_125_PE17	HBG032080
ENSMUSG00000003500	MOUSE6_31_PE2	HBG003682
ENSMUSG00000071041	MOUSE8_105_PE1	HBG003682
ENSMUSG00000062867	MOUSE9_113_PE4	HBG003682
ENSMUSG00000025025	MOUSE19_55_PE4	HBG046171
ENSMUSG00000021485	MOUSE13_57_PE33	HBG046171
ENSMUSG00000030770	MOUSE7_116_PE5	HBG007163
ENSMUSG00000022438	MOUSE15_87_PE18	HBG007163
ENSMUSG00000049213	MOUSE2_73_PE6	HBG060019
ENSMUSG00000024782	MOUSE19_30_PE8	HBG060019
ENSMUSG00000003731	MOUSE4_133_PE35	HBG005877
ENSMUSG00000022905	MOUSE16_38_PE8	HBG005877
ENSMUSG00000027782	MOUSE3_71_PE9	HBG005877
ENSMUSG00000021929	MOUSE14_62_PE10	HBG005877
ENSMUSG00000044257	MOUSE9_106_PE8	HBG005877
ENSMUSG00000038770	MOUSE5_150_PE20	HBG005877
ENSMUSG00000066878	MOUSE17_93_PE3	HBG005877
ENSMUSG00000069083	MOUSE3_26_PE1	HBG005877
ENSMUSG00000050278	MOUSE2_13_PE1	HBG005877
ENSMUSG00000020262	MOUSE10_80_PE8	HBG059014
ENSMUSG00000052551	MOUSE13_9_PE2	HBG059014
ENSMUSG00000029570	MOUSE5_146_PE12	HBG064671
ENSMUSG00000018169	MOUSE15_82_PE9	HBG064671
ENSMUSG00000032580	MOUSE9_112_PE24	HBG072051
ENSMUSG00000042188	MOUSE1_35_PE8	HBG072051
ENSMUSG00000031060	MOUSEX_21_PE5	HBG072051
ENSMUSG00000036095	MOUSE12_40_PE2	HBG006448
ENSMUSG00000022861	MOUSE16_23_PE17	HBG006448
ENSMUSG00000006435	MOUSE19_48_PE30	HBG021940
ENSMUSG00000034413	MOUSE17_28_PE11	HBG021940
ENSMUSG00000007656	MOUSE9_78_PE6	HBG069219
ENSMUSG00000038619	MOUSE3_98_PE44	HBG069219
ENSMUSG00000050797	MOUSE17_24_PE13	HBG069219
ENSMUSG00000057098	MOUSE11_47_PE1	HBG038076
ENSMUSG00000053552	MOUSE2_132_PE3	HBG038076
ENSMUSG00000002565	MOUSE12_42_PE5	HBG056406
ENSMUSG00000056737	MOUSE6_71_PE23	HBG056406
ENSMUSG00000028138	MOUSE3_142_PE15	HBG014277
ENSMUSG00000037797	MOUSE3_142_PE14	HBG014277
ENSMUSG00000074207	MOUSE3_142_PE10	HBG014277
ENSMUSG00000055301	MOUSE3_142_PE9	HBG014277
ENSMUSG00000074206	MOUSE3_142_PE12	HBG014277
ENSMUSG00000053054	MOUSE3_142_PE11	HBG014277
ENSMUSG00000040852	MOUSE17_88_PE3	HBG052336
ENSMUSG00000060716	MOUSE12_82_PE9	HBG052336
ENSMUSG00000025092	MOUSE19_61_PE5	HBG020164
ENSMUSG00000074793	MOUSE2_132_PE31	HBG020164
ENSMUSG00000000538	MOUSE11_62_PE29	HBG026088
ENSMUSG00000020541	MOUSE11_93_PE11	HBG026088
ENSMUSG00000028221	MOUSE4_15_PE5	HBG011307
ENSMUSG00000035953	MOUSE14_51_PE27	HBG011307
ENSMUSG00000047409	MOUSE9_123_PE6	HBG031733
ENSMUSG00000026176	MOUSE1_76_PE15	HBG031733
ENSMUSG00000034612	MOUSE10_86_PE3	HBG056254
ENSMUSG00000056643	MOUSE6_89_PE20	HBG056254
ENSMUSG00000019909	MOUSE10_53_PE4	HBG074802
ENSMUSG00000003955	MOUSE16_38_PE10	HBG074802
ENSMUSG00000019794	MOUSE10_8_PE10	HBG059796
ENSMUSG00000041298	MOUSE5_154_PE8	HBG059796
ENSMUSG00000035455	MOUSE11_12_PE16	HBG059796
ENSMUSG00000075324	MOUSE2_64_PE1	HBG059796
ENSMUSG00000028185	MOUSE3_150_PE14	HBG027572
ENSMUSG00000003812	MOUSE8_89_PE31	HBG027572
ENSMUSG00000024212	MOUSE17_59_PE33	HBG061434
ENSMUSG00000028496	MOUSE4_90_PE3	HBG061434
ENSMUSG00000052534	MOUSE1_174_PE1	HBG022373
ENSMUSG00000031860	MOUSE8_74_PE17	HBG022373
ENSMUSG00000034488	MOUSE13_93_PE1	HBG050686
ENSMUSG00000030605	MOUSE7_82_PE3	HBG050686
ENSMUSG00000028044	MOUSE3_92_PE44	HBG032291
ENSMUSG00000062687	MOUSE8_90_PE1	HBG032291
ENSMUSG00000061453	MOUSE14_33_PE6	HBG032291
ENSMUSG00000062248	MOUSE1_9_PE2	HBG032291
ENSMUSG00000022241	MOUSE15_12_PE6	HBG057413
ENSMUSG00000028107	MOUSE3_98_PE49	HBG057413
ENSMUSG00000002103	MOUSE2_92_PE33	HBG033558
ENSMUSG00000032561	MOUSE9_108_PE9	HBG033558
ENSMUSG00000037341	MOUSEX_20_PE2	HBG004392
ENSMUSG00000031129	MOUSE9_98_PE2	HBG004392
ENSMUSG00000002064	MOUSE11_81_PE39	HBG004847
ENSMUSG00000022769	MOUSE16_18_PE14	HBG004847
ENSMUSG00000053931	MOUSE3_125_PE1	HBG076902
ENSMUSG00000001349	MOUSE9_23_PE22	HBG076902
ENSMUSG00000063872	MOUSE7_44_PE1	HBG037562
ENSMUSG00000021096	MOUSE12_76_PE4	HBG037562
ENSMUSG00000030402	MOUSE7_19_PE34	HBG037562
ENSMUSG00000074968	MOUSE2_112_PE4	HBG061448
ENSMUSG00000035189	MOUSE10_92_PE7	HBG061448
ENSMUSG00000020362	MOUSE11_52_PE4	HBG008033
ENSMUSG00000034724	MOUSE5_99_PE6	HBG008033
ENSMUSG00000020650	MOUSE12_33_PE11	HBG005162
ENSMUSG00000002015	MOUSEX_71_PE27	HBG005162
ENSMUSG00000022957	MOUSE16_95_PE7	HBG019791
ENSMUSG00000020640	MOUSE12_5_PE8	HBG019791
ENSMUSG00000024781	MOUSE19_35_PE11	HBG059664
ENSMUSG00000024766	MOUSE19_34_PE5	HBG059664
ENSMUSG00000034591	MOUSE10_86_PE5	HBG032073
ENSMUSG00000013275	MOUSE1_136_PE21	HBG032073
ENSMUSG00000005447	MOUSE7_26_PE18	HBG010686
ENSMUSG00000003131	MOUSE9_48_PE12	HBG010686
ENSMUSG00000052429	MOUSE7_46_PE27	HBG065145
ENSMUSG00000030350	MOUSE6_128_PE5	HBG065145
ENSMUSG00000041986	MOUSE9_56_PE10	HBG057652
ENSMUSG00000035151	MOUSE8_88_PE5	HBG057652
[truncated: 449 more rows]

## Sheet: 2R_sing
Ensembl_gene_id	Homolens_gene_id	Homolens_family_id
ENSMUSG00000006517	MOUSE8_128_PE7	HBG000098
ENSMUSG00000001521	MOUSE6_128_PE12	HBG069344
ENSMUSG00000031796	MOUSE8_100_PE15	HBG006174
ENSMUSG00000028030	MOUSE3_136_PE3	HBG077545
ENSMUSG00000017453	MOUSE11_81_PE9	HBG075210
ENSMUSG00000044629	MOUSE11_18_PE4	HBG018775
ENSMUSG00000045503	MOUSE2_166_PE29	HBG006967
ENSMUSG00000043153	MOUSE12_38_PE7	HBG037461
ENSMUSG00000028882	MOUSE4_136_PE22	HBG005376
ENSMUSG00000000171	MOUSE9_53_PE7	HBG028041
ENSMUSG00000024603	MOUSE18_63_PE7	HBG000902
ENSMUSG00000022974	MOUSE16_94_PE12	HBG078219
ENSMUSG00000000295	MOUSE10_32_PE6	HBG038839
ENSMUSG00000028295	MOUSE4_36_PE10	HBG003004
ENSMUSG00000022568	MOUSE15_79_PE26	HBG020377
ENSMUSG00000019578	MOUSE17_58_PE19	HBG030991
ENSMUSG00000027518	MOUSE2_176_PE1	HBG020195
ENSMUSG00000039067	MOUSE8_112_PE21	HBG010106
ENSMUSG00000029221	MOUSE5_70_PE1	HBG000035
ENSMUSG00000033055	MOUSE15_82_PE27	HBG076557
ENSMUSG00000067829	MOUSEX_60_PE3	HBG003078
ENSMUSG00000023949	MOUSE17_47_PE11	HBG022328
ENSMUSG00000035247	MOUSE12_54_PE1	HBG002638
ENSMUSG00000024208	MOUSE17_29_PE3	HBG069260
ENSMUSG00000014859	MOUSE8_110_PE15	HBG067552
ENSMUSG00000020447	MOUSE11_7_PE3	HBG005283
ENSMUSG00000024413	MOUSE18_13_PE7	HBG005283
ENSMUSG00000013593	MOUSE1_177_PE22	HBG044536
ENSMUSG00000039199	MOUSE8_110_PE29	HBG044944
ENSMUSG00000018931	MOUSE11_63_PE14	HBG021414
ENSMUSG00000021400	MOUSE13_35_PE1	HBG060874
ENSMUSG00000028048	MOUSE3_92_PE20	HBG073041
ENSMUSG00000071632	MOUSE16_20_PE4	HBG020981
ENSMUSG00000040356	MOUSE17_37_PE8	HBG007489
ENSMUSG00000026281	MOUSE1_98_PE10	HBG002802
ENSMUSG00000030177	MOUSE6_120_PE15	HBG023720
ENSMUSG00000005982	MOUSE16_4_PE12	HBG005809
ENSMUSG00000031657	MOUSE8_93_PE5	HBG021075
ENSMUSG00000052214	MOUSE7_19_PE31	HBG065739
ENSMUSG00000023070	MOUSEX_21_PE2	HBG001213
ENSMUSG00000022437	MOUSE15_87_PE17	HBG027148
ENSMUSG00000030682	MOUSE7_131_PE11	HBG013475
ENSMUSG00000026726	MOUSE2_14_PE2	HBG038109
ENSMUSG00000039879	MOUSE10_19_PE2	HBG026369
ENSMUSG00000035910	MOUSE13_27_PE5	HBG023437
ENSMUSG00000031826	MOUSE8_125_PE23	HBG047887
ENSMUSG00000034235	MOUSE14_20_PE24	HBG038397
ENSMUSG00000047879	MOUSE18_11_PE2	HBG009595
ENSMUSG00000026615	MOUSE1_191_PE6	HBG031768
ENSMUSG00000028329	MOUSE4_47_PE14	HBG006721
ENSMUSG00000015189	MOUSE6_5_PE3	HBG057517
ENSMUSG00000018733	MOUSE11_86_PE15	HBG059582
ENSMUSG00000021518	MOUSE13_70_PE8	HBG023219
ENSMUSG00000025495	MOUSE7_145_PE38	HBG023219
ENSMUSG00000029642	MOUSE5_153_PE2	HBG039167
ENSMUSG00000028467	MOUSE4_45_PE6	HBG044296
ENSMUSG00000001424	MOUSE6_30_PE8	HBG024673
ENSMUSG00000028069	MOUSE3_91_PE15	HBG057176
ENSMUSG00000062031	MOUSE7_145_PE27	HBG081899
ENSMUSG00000063317	MOUSE7_125_PE4	HBG047856
ENSMUSG00000004945	MOUSE17_6_PE3	HBG057841
ENSMUSG00000033706	MOUSE6_84_PE17	HBG005407
ENSMUSG00000006169	MOUSE11_48_PE2	HBG025117
ENSMUSG00000020571	MOUSE12_18_PE6	HBG004247
ENSMUSG00000040472	MOUSE14_56_PE33	HBG055707
ENSMUSG00000025224	MOUSE19_47_PE26	HBG003999
ENSMUSG00000069020	MOUSE2_31_PE1	HBG075913
ENSMUSG00000028608	MOUSE4_110_PE28	HBG078346
ENSMUSG00000033554	MOUSE3_119_PE4	HBG025661
ENSMUSG00000026584	MOUSE1_170_PE1	HBG020698
ENSMUSG00000034329	MOUSE11_89_PE1	HBG015242
ENSMUSG00000038685	MOUSE2_184_PE17	HBG015242
ENSMUSG00000020962	MOUSE12_95_PE7	HBG019582
ENSMUSG00000074277	MOUSE7_25_PE34	HBG026315
ENSMUSG00000041343	MOUSE7_96_PE3	HBG025200
ENSMUSG00000026987	MOUSE2_60_PE7	HBG024440
ENSMUSG00000030225	MOUSE6_138_PE7	HBG021180
ENSMUSG00000049882	MOUSE12_73_PE2	HBG037299
ENSMUSG00000027185	MOUSE2_105_PE2	HBG050677
ENSMUSG00000024953	MOUSE19_8_PE2	HBG002222
ENSMUSG00000029524	MOUSE5_119_PE30	HBG012311
ENSMUSG00000051506	MOUSE14_33_PE3	HBG030154
ENSMUSG00000038785	MOUSE8_38_PE2	HBG059288
ENSMUSG00000027104	MOUSE2_74_PE16	HBG023265
ENSMUSG00000009614	MOUSE2_28_PE17	HBG057919
ENSMUSG00000042102	MOUSE13_98_PE8	HBG057919
ENSMUSG00000033624	MOUSE8_116_PE17	HBG057919
ENSMUSG00000047839	MOUSE1_68_PE5	HBG060950
ENSMUSG00000028737	MOUSE4_143_PE23	HBG001020
ENSMUSG00000023110	MOUSE14_55_PE12	HBG002554
ENSMUSG00000025609	MOUSE6_33_PE3	HBG006838
ENSMUSG00000021610	MOUSE13_77_PE2	HBG001833
ENSMUSG00000002981	MOUSE7_20_PE1	HBG001833
ENSMUSG00000046679	MOUSE6_85_PE26	HBG019140
ENSMUSG00000030034	MOUSE6_82_PE18	HBG019636
ENSMUSG00000031938	MOUSE9_16_PE10	HBG058245
ENSMUSG00000028684	MOUSE4_120_PE13	HBG019257
ENSMUSG00000029617	MOUSE5_149_PE28	HBG004122
ENSMUSG00000041360	MOUSE19_28_PE4	HBG025272
ENSMUSG00000027242	MOUSE2_123_PE18	HBG051045
ENSMUSG00000020289	MOUSE11_33_PE13	HBG002250
ENSMUSG00000049791	MOUSE7_92_PE2	HBG072021
ENSMUSG00000026096	MOUSE1_55_PE15	HBG034038
ENSMUSG00000026958	MOUSE2_26_PE30	HBG026598
ENSMUSG00000020083	MOUSE10_64_PE10	HBG081723
ENSMUSG00000054302	MOUSE12_57_PE5	HBG026549
ENSMUSG00000030630	MOUSE7_87_PE4	HBG006059
ENSMUSG00000026975	MOUSE2_26_PE3	HBG021930
ENSMUSG00000033762	MOUSE15_80_PE21	HBG082636
ENSMUSG00000027809	MOUSE3_82_PE6	HBG002526
ENSMUSG00000003235	MOUSE16_21_PE14	HBG001176
ENSMUSG00000026563	MOUSE1_172_PE10	HBG007889
ENSMUSG00000050574	MOUSE5_148_PE15	HBG001517
ENSMUSG00000038175	MOUSE13_47_PE6	HBG000357
ENSMUSG00000027424	MOUSE2_145_PE12	HBG020131
ENSMUSG00000028261	MOUSE4_26_PE2	HBG000853
ENSMUSG00000036962	MOUSE1_124_PE7	HBG061123
ENSMUSG00000027702	MOUSE3_32_PE7	HBG021771
ENSMUSG00000035047	MOUSE9_22_PE24	HBG003534
ENSMUSG00000036469	MOUSE8_70_PE2	HBG052867
ENSMUSG00000039616	MOUSE18_26_PE6	HBG010512
ENSMUSG00000018287	MOUSE11_73_PE79	HBG038442
ENSMUSG00000032219	MOUSE9_75_PE12	HBG050679
ENSMUSG00000036557	MOUSE17_91_PE8	HBG037297
ENSMUSG00000032560	MOUSE9_108_PE7	HBG025737
ENSMUSG00000024474	MOUSE18_38_PE22	HBG004006
ENSMUSG00000013465	MOUSE2_26_PE13	HBG048194
ENSMUSG00000033579	MOUSE8_116_PE21	HBG048145
ENSMUSG00000002825	MOUSE9_22_PE30	HBG007665
ENSMUSG00000071103	MOUSE8_48_PE7	HBG043129
ENSMUSG00000021338	MOUSE13_26_PE3	HBG019405
ENSMUSG00000041736	MOUSE15_87_PE7	HBG067955
ENSMUSG00000024999	MOUSE19_40_PE2	HBG034886
ENSMUSG00000029598	MOUSE5_124_PE7	HBG026818
ENSMUSG00000030214	MOUSE6_137_PE6	HBG026818
ENSMUSG00000020850	MOUSE11_78_PE29	HBG004188
ENSMUSG00000002307	MOUSE17_36_PE8	HBG070932
ENSMUSG00000032098	MOUSE9_46_PE43	HBG003990
ENSMUSG00000030754	MOUSE7_118_PE1	HBG000426
ENSMUSG00000026377	MOUSE1_123_PE2	HBG050081
ENSMUSG00000046886	MOUSE18_55_PE4	HBG014879
ENSMUSG00000031518	MOUSE8_57_PE3	HBG045472
ENSMUSG00000023084	MOUSE3_90_PE19	HBG048980
ENSMUSG00000028687	MOUSE4_120_PE8	HBG023968
ENSMUSG00000021621	MOUSE13_95_PE10	HBG045013
ENSMUSG00000057457	MOUSEX_153_PE2	HBG024267
ENSMUSG00000026247	MOUSE1_91_PE6	HBG024267
ENSMUSG00000032295	MOUSE9_59_PE13	HBG056322
ENSMUSG00000002329	MOUSE14_56_PE26	HBG019402
ENSMUSG00000062729	MOUSE1_177_PE25	HBG005556
ENSMUSG00000051255	MOUSE19_24_PE9	HBG049363
ENSMUSG00000028990	MOUSE4_153_PE5	HBG038494
ENSMUSG00000035367	MOUSE13_61_PE2	HBG059196
ENSMUSG00000042251	MOUSE1_136_PE20	HBG038333
ENSMUSG00000006134	MOUSE16_18_PE25	HBG020988
ENSMUSG00000021951	MOUSE14_58_PE8	HBG004232
ENSMUSG00000031591	MOUSE8_43_PE23	HBG046492
ENSMUSG00000029413	MOUSE5_96_PE14	HBG046492
ENSMUSG00000044442	MOUSE16_90_PE1	HBG003239
ENSMUSG00000031562	MOUSE8_50_PE10	HBG010108
ENSMUSG00000037578	MOUSE19_45_PE17	HBG030418
ENSMUSG00000042303	MOUSE15_84_PE8	HBG005304
ENSMUSG00000030562	MOUSE7_90_PE2	HBG046022
ENSMUSG00000070284	MOUSE9_112_PE39	HBG018410
ENSMUSG00000033021	MOUSE1_77_PE34	HBG018410
ENSMUSG00000017405	MOUSE11_81_PE30	HBG055817
ENSMUSG00000023094	MOUSE2_20_PE4	HBG022747
ENSMUSG00000029104	MOUSE5_37_PE7	HBG049008
ENSMUSG00000049287	MOUSE11_61_PE44	HBG001084
ENSMUSG00000041717	MOUSE1_138_PE5	HBG061317
ENSMUSG00000042046	MOUSE1_137_PE7	HBG012073
ENSMUSG00000052962	MOUSE6_71_PE2	HBG077669
ENSMUSG00000024382	MOUSE18_34_PE9	HBG008918
ENSMUSG00000029715	MOUSE5_143_PE10	HBG022687
ENSMUSG00000018405	MOUSE11_87_PE13	HBG060027
ENSMUSG00000036613	MOUSE12_30_PE8	HBG001957
ENSMUSG00000028483	MOUSE4_85_PE5	HBG052097
ENSMUSG00000033917	MOUSE7_122_PE11	HBG033595
ENSMUSG00000029326	MOUSE5_103_PE8	HBG038198
ENSMUSG00000032468	MOUSE9_103_PE6	HBG021826
ENSMUSG00000071451	MOUSE13_36_PE12	HBG069227
ENSMUSG00000026734	MOUSE2_20_PE7	HBG047005
ENSMUSG00000003380	MOUSE7_25_PE53	HBG007686
ENSMUSG00000015087	MOUSE2_26_PE54	HBG019894
ENSMUSG00000042650	MOUSE11_63_PE1	HBG047773
ENSMUSG00000061171	MOUSE2_66_PE1	HBG023288
ENSMUSG00000029477	MOUSE5_127_PE15	HBG056461
ENSMUSG00000033427	MOUSE10_78_PE10	HBG010019
ENSMUSG00000028603	MOUSE4_111_PE5	HBG004827
ENSMUSG00000041168	MOUSE17_59_PE19	HBG038135
ENSMUSG00000047866	MOUSE8_91_PE4	HBG038135
ENSMUSG00000048772	MOUSE4_120_PE27	HBG063638
ENSMUSG00000020974	MOUSE12_72_PE9	HBG004903
ENSMUSG00000059439	MOUSE11_88_PE9	HBG025621
ENSMUSG00000033540	MOUSE5_112_PE21	HBG000319
ENSMUSG00000036748	MOUSE19_47_PE32	HBG008260
ENSMUSG00000059854	MOUSE8_115_PE17	HBG025944
ENSMUSG00000022570	MOUSE15_79_PE18	HBG076084
ENSMUSG00000031667	MOUSE8_96_PE2	HBG063288
ENSMUSG00000020079	MOUSE10_64_PE19	HBG002514
ENSMUSG00000022561	MOUSE15_79_PE50	HBG003881
ENSMUSG00000036810	MOUSE8_93_PE3	HBG001873
ENSMUSG00000020716	MOUSE11_82_PE10	HBG003092
ENSMUSG00000026816	MOUSE2_29_PE16	HBG003735
ENSMUSG00000019816	MOUSE10_43_PE13	HBG061454
ENSMUSG00000036188	MOUSE12_38_PE3	HBG000156
ENSMUSG00000013646	MOUSE11_60_PE20	HBG083095
ENSMUSG00000034278	MOUSE2_120_PE26	HBG001716
ENSMUSG00000054362	MOUSE4_109_PE6	HBG023921
ENSMUSG00000000902	MOUSE10_79_PE2	HBG000290
ENSMUSG00000000131	MOUSE7_130_PE2	HBG023695
ENSMUSG00000071398	MOUSE12_18_PE4	HBG042842
ENSMUSG00000022663	MOUSE16_47_PE18	HBG001649
ENSMUSG00000046947	MOUSE6_41_PE13	HBG027173
ENSMUSG00000021786	MOUSE14_16_PE2	HBG038921
ENSMUSG00000021814	MOUSE14_20_PE17	HBG057015
ENSMUSG00000055114	MOUSE15_61_PE11	HBG057015
ENSMUSG00000031635	MOUSE8_66_PE8	HBG057015
ENSMUSG00000013622	MOUSE5_33_PE16	HBG049275
ENSMUSG00000030138	MOUSE6_118_PE14	HBG005440
ENSMUSG00000056832	MOUSE6_40_PE11	HBG006927
ENSMUSG00000037847	MOUSE19_19_PE3	HBG025296
ENSMUSG00000038822	MOUSE10_47_PE6	HBG025531
ENSMUSG00000039000	MOUSE5_31_PE8	HBG008606
ENSMUSG00000056131	MOUSE9_90_PE6	HBG004661
ENSMUSG00000031792	MOUSE8_100_PE13	HBG066276
ENSMUSG00000003526	MOUSE16_19_PE16	HBG007774
ENSMUSG00000073856	MOUSE7_122_PE18	HBG050146
ENSMUSG00000007415	MOUSE5_4_PE11	HBG078288
ENSMUSG00000036764	MOUSE10_65_PE27	HBG002172
ENSMUSG00000020283	MOUSE11_25_PE3	HBG053432
ENSMUSG00000036057	MOUSE9_114_PE28	HBG051863
ENSMUSG00000022805	MOUSE16_40_PE7	HBG021660
ENSMUSG00000031600	MOUSE8_43_PE3	HBG002087
ENSMUSG00000040688	MOUSE17_26_PE46	HBG000414
ENSMUSG00000027778	MOUSE3_71_PE6	HBG038259
ENSMUSG00000031575	MOUSE8_28_PE14	HBG007708
ENSMUSG00000032463	MOUSE9_102_PE12	HBG021821
ENSMUSG00000020628	MOUSE12_30_PE7	HBG049884
ENSMUSG00000050323	MOUSE4_12_PE2	HBG003488
ENSMUSG00000056665	MOUSE15_78_PE8	HBG007596
ENSMUSG00000032370	MOUSE9_70_PE4	HBG030278
ENSMUSG00000028889	MOUSE4_128_PE10	HBG046584
ENSMUSG00000066510	MOUSE9_68_PE21	HBG076600
ENSMUSG00000012848	MOUSE7_13_PE1	HBG009162
ENSMUSG00000034212	MOUSE1_97_PE16	HBG026276
ENSMUSG00000045302	MOUSE5_33_PE11	HBG057226
ENSMUSG00000028127	MOUSE3_125_PE7	HBG044661
ENSMUSG00000058706	MOUSE6_71_PE12	HBG019727
ENSMUSG00000066643	MOUSE12_10_PE2	HBG003459
ENSMUSG00000032598	MOUSE9_113_PE18	HBG045832
ENSMUSG00000041138	MOUSE13_21_PE4	HBG024142
ENSMUSG00000000782	MOUSE11_54_PE26	HBG049427
ENSMUSG00000059883	MOUSE15_98_PE3	HBG024409
ENSMUSG00000043940	MOUSE5_105_PE3	HBG004119
ENSMUSG00000031878	MOUSE8_109_PE17	HBG021091
ENSMUSG00000031949	MOUSE8_117_PE13	HBG002333
ENSMUSG00000074591	MOUSE3_60_PE2	HBG050010
ENSMUSG00000050973	MOUSE7_83_PE6	HBG059729
ENSMUSG00000031568	MOUSE8_50_PE2	HBG001922
ENSMUSG00000041491	MOUSE19_17_PE2	HBG025298
ENSMUSG00000024581	MOUSE18_66_PE3	HBG005964
ENSMUSG00000041671	MOUSE6_143_PE3	HBG004356
ENSMUSG00000030423	MOUSE7_39_PE5	HBG021118
ENSMUSG00000020639	MOUSE12_5_PE13	HBG019784
ENSMUSG00000039163	MOUSE9_122_PE5	HBG017370
ENSMUSG00000070319	MOUSE9_22_PE4	HBG024923
ENSMUSG00000010755	MOUSE7_148_PE5	HBG008781
ENSMUSG00000056228	MOUSE8_12_PE6	HBG008781
ENSMUSG00000067787	MOUSE2_159_PE18	HBG049455
ENSMUSG00000005949	MOUSE11_76_PE17	HBG029717
ENSMUSG00000004356	MOUSE10_92_PE5	HBG015277
ENSMUSG00000029500	MOUSE5_114_PE11	HBG002089
ENSMUSG00000029097	MOUSE5_38_PE1	HBG026320
ENSMUSG00000019214	MOUSE17_27_PE27	HBG068240
ENSMUSG00000035311	MOUSE10_91_PE16	HBG024475
ENSMUSG00000028093	MOUSE3_100_PE8	HBG061118
ENSMUSG00000029472	MOUSE5_127_PE6	HBG077905
ENSMUSG00000027207	MOUSE2_127_PE8	HBG010199
ENSMUSG00000001418	MOUSE3_91_PE25	HBG023769
ENSMUSG00000005804	MOUSE2_124_PE11	HBG025931
ENSMUSG00000028124	MOUSE3_125_PE11	HBG032634
ENSMUSG00000030982	MOUSE7_122_PE14	HBG007128
ENSMUSG00000024583	MOUSE18_66_PE7	HBG003036
ENSMUSG00000031787	MOUSE8_100_PE5	HBG011650
ENSMUSG00000035202	MOUSE9_128_PE1	HBG022239
ENSMUSG00000032998	MOUSE4_123_PE2	HBG060499
ENSMUSG00000002660	MOUSE17_59_PE35	HBG004162
ENSMUSG00000040013	MOUSE5_140_PE31	HBG022658
ENSMUSG00000015357	MOUSE9_68_PE14	HBG007416
ENSMUSG00000021975	MOUSE14_65_PE12	HBG005896
ENSMUSG00000005907	MOUSE5_4_PE8	HBG037454
ENSMUSG00000024357	MOUSE18_37_PE11	HBG037322
ENSMUSG00000037075	MOUSE15_61_PE18	HBG048832
ENSMUSG00000038541	MOUSE17_77_PE5	HBG038250
ENSMUSG00000022557	MOUSE15_79_PE61	HBG002399
ENSMUSG00000046844	MOUSE8_119_PE10	HBG019561
ENSMUSG00000028199	MOUSE3_158_PE11	HBG019561
ENSMUSG00000019864	MOUSE10_45_PE11	HBG019561
ENSMUSG00000033488	MOUSE1_162_PE8	HBG019561
ENSMUSG00000049090	MOUSE18_88_PE2	HBG019561
ENSMUSG00000005198	MOUSE11_72_PE65	HBG006478
ENSMUSG00000017561	MOUSE11_83_PE4	HBG047818
ENSMUSG00000030612	MOUSE7_81_PE4	HBG048518
ENSMUSG00000002496	MOUSE17_26_PE33	HBG048179
ENSMUSG00000022672	MOUSE16_16_PE5	HBG020342
ENSMUSG00000059013	MOUSE2_34_PE4	HBG024958
ENSMUSG00000028476	MOUSE4_45_PE23	HBG001764
ENSMUSG00000028114	MOUSE3_126_PE14	HBG001640
ENSMUSG00000007721	MOUSE8_75_PE32	HBG003115
ENSMUSG00000030094	MOUSE6_91_PE4	HBG022245
ENSMUSG00000027309	MOUSE2_132_PE23	HBG020171
ENSMUSG00000029179	MOUSE5_55_PE6	HBG024719
ENSMUSG00000029763	MOUSE6_35_PE4	HBG001557
ENSMUSG00000004610	MOUSE7_44_PE21	HBG000776
ENSMUSG00000033809	MOUSE16_21_PE25	HBG004668
ENSMUSG00000038963	MOUSE2_183_PE11	HBG069193
ENSMUSG00000021504	MOUSE13_58_PE17	HBG025001
ENSMUSG00000061360	MOUSE15_85_PE15	HBG005511
ENSMUSG00000022673	MOUSE16_16_PE4	HBG006876
ENSMUSG00000026761	MOUSE2_49_PE2	HBG004097
ENSMUSG00000032504	MOUSE9_118_PE2	HBG057525
ENSMUSG00000025193	MOUSE19_45_PE6	HBG022819
ENSMUSG00000031696	MOUSE8_90_PE3	HBG059913
ENSMUSG00000040913	MOUSE19_47_PE4	HBG038063
ENSMUSG00000049571	MOUSE7_144_PE6	HBG056861
ENSMUSG00000055041	MOUSE15_80_PE30	HBG020448
ENSMUSG00000014232	MOUSE16_4_PE16	HBG030909
ENSMUSG00000062405	MOUSE2_60_PE8	HBG027022
ENSMUSG00000073609	MOUSE1_98_PE12	HBG001379
ENSMUSG00000030967	MOUSE7_137_PE8	HBG004427
ENSMUSG00000022160	MOUSE14_53_PE5	HBG004855
ENSMUSG00000037487	MOUSE15_40_PE2	HBG011580
ENSMUSG00000035575	MOUSE11_83_PE1	HBG053487
ENSMUSG00000030978	MOUSE7_106_PE2	HBG010006
ENSMUSG00000022024	MOUSE14_80_PE14	HBG020044
ENSMUSG00000026500	MOUSE1_184_PE7	HBG065148
ENSMUSG00000032498	MOUSE9_115_PE34	HBG001314
ENSMUSG00000031546	MOUSE8_25_PE7	HBG001810
ENSMUSG00000028414	MOUSE4_55_PE8	HBG026179
ENSMUSG00000036299	MOUSE18_78_PE10	HBG021961
ENSMUSG00000048799	MOUSE18_56_PE5	HBG024998
ENSMUSG00000057176	MOUSE7_131_PE55	HBG070053
ENSMUSG00000050188	MOUSE4_129_PE8	HBG023993
ENSMUSG00000020380	MOUSE11_56_PE4	HBG047523
ENSMUSG00000026272	MOUSE1_97_PE24	HBG005383
ENSMUSG00000041479	MOUSE14_34_PE12	HBG067820
ENSMUSG00000024743	MOUSE19_11_PE15	HBG067820
ENSMUSG00000049303	MOUSE19_5_PE35	HBG067820
ENSMUSG00000041831	MOUSE17_7_PE15	HBG067820
ENSMUSG00000021076	MOUSE12_74_PE3	HBG005045
ENSMUSG00000019809	MOUSE10_14_PE7	HBG037752
ENSMUSG00000028540	MOUSE4_121_PE11	HBG027904
ENSMUSG00000025645	MOUSE9_113_PE34	HBG085423
ENSMUSG00000029554	MOUSE5_146_PE1	HBG038537
ENSMUSG00000019977	MOUSE10_22_PE8	HBG059570
ENSMUSG00000032869	MOUSE2_153_PE16	HBG084726
ENSMUSG00000029182	MOUSE5_32_PE15	HBG037561
ENSMUSG00000022844	MOUSE16_37_PE6	HBG021678
ENSMUSG00000022972	MOUSE16_94_PE10	HBG004436
ENSMUSG00000018040	MOUSE15_86_PE19	HBG059111
ENSMUSG00000035764	MOUSE16_34_PE7	HBG015433
ENSMUSG00000071330	MOUSE10_43_PE3	HBG042738
ENSMUSG00000020397	MOUSE11_48_PE17	HBG032128
ENSMUSG00000020462	MOUSE11_30_PE13	HBG083562
ENSMUSG00000053644	MOUSE18_59_PE3	HBG010654
ENSMUSG00000026743	MOUSE2_19_PE5	HBG021437
ENSMUSG00000049922	MOUSE2_93_PE24	HBG002482
ENSMUSG00000042660	MOUSE18_39_PE1	HBG047229
ENSMUSG00000027168	MOUSE2_107_PE5	HBG060095
ENSMUSG00000029455	MOUSE5_125_PE28	HBG075000
ENSMUSG00000020256	MOUSE10_86_PE7	HBG075000
ENSMUSG00000026687	MOUSE1_173_PE6	HBG075000
ENSMUSG00000037542	MOUSE10_22_PE9	HBG075000
ENSMUSG00000021238	MOUSE12_88_PE32	HBG075000
ENSMUSG00000027952	MOUSE3_92_PE49	HBG016191
ENSMUSG00000029658	MOUSE5_155_PE13	HBG025761
ENSMUSG00000071855	MOUSE18_49_PE2	HBG059116
ENSMUSG00000002343	MOUSE8_74_PE39	HBG006364
ENSMUSG00000039515	MOUSE2_31_PE34	HBG058756
ENSMUSG00000070806	MOUSE4_122_PE43	HBG019744
ENSMUSG00000029176	MOUSE5_55_PE7	HBG046186
ENSMUSG00000037262	MOUSE2_11_PE2	HBG004726
ENSMUSG00000040591	MOUSE2_92_PE40	HBG020611
ENSMUSG00000001666	MOUSE10_78_PE22	HBG073404
ENSMUSG00000004264	MOUSE6_125_PE10	HBG058178
ENSMUSG00000045140	MOUSE11_87_PE19	HBG062716
ENSMUSG00000015971	MOUSE14_30_PE3	HBG059738
ENSMUSG00000052833	MOUSE7_16_PE21	HBG001687
ENSMUSG00000022759	MOUSE16_18_PE31	HBG047139
ENSMUSG00000025007	MOUSE19_42_PE1	HBG002035
ENSMUSG00000031931	MOUSE9_15_PE11	HBG074718
ENSMUSG00000019710	MOUSE3_91_PE6	HBG032701
ENSMUSG00000005981	MOUSE16_4_PE21	HBG073713
ENSMUSG00000041199	MOUSE17_27_PE28	HBG002485
ENSMUSG00000040549	MOUSE2_92_PE44	HBG001237
ENSMUSG00000046192	MOUSE6_26_PE3	HBG041120
ENSMUSG00000014245	MOUSE11_64_PE27	HBG000132
ENSMUSG00000066438	MOUSE12_84_PE11	HBG061430
ENSMUSG00000018554	MOUSE11_73_PE19	HBG077729
ENSMUSG00000024370	MOUSE18_36_PE21	HBG026608
ENSMUSG00000031928	MOUSE9_15_PE12	HBG033404
ENSMUSG00000038497	MOUSE8_14_PE23	HBG020043
ENSMUSG00000010911	MOUSE2_104_PE7	HBG035539
ENSMUSG00000031783	MOUSE8_99_PE29	HBG003330
ENSMUSG00000039391	MOUSE7_93_PE5	HBG023241
ENSMUSG00000021033	MOUSE12_91_PE12	HBG007376
ENSMUSG00000004896	MOUSE3_91_PE7	HBG023778
ENSMUSG00000020330	MOUSE11_42_PE3	HBG040288
ENSMUSG00000018999	MOUSE6_36_PE3	HBG002049
ENSMUSG00000032203	MOUSE9_76_PE13	HBG029292
ENSMUSG00000022253	MOUSE15_10_PE3	HBG068527
ENSMUSG00000031608	MOUSE8_61_PE6	HBG068984
ENSMUSG00000031977	MOUSE8_130_PE1	HBG068984
ENSMUSG00000033222	MOUSE3_104_PE7	HBG029996
ENSMUSG00000027774	MOUSE3_70_PE1	HBG009753
ENSMUSG00000019988	MOUSE10_95_PE2	HBG024464
ENSMUSG00000002017	MOUSE17_79_PE2	HBG059453
ENSMUSG00000025616	MOUSE16_90_PE4	HBG052967
ENSMUSG00000032040	MOUSE9_37_PE6	HBG023124
ENSMUSG00000028960	MOUSE4_153_PE1	HBG029708
ENSMUSG00000059890	MOUSE9_47_PE8	HBG029708
ENSMUSG00000046020	MOUSE2_155_PE9	HBG001361
ENSMUSG00000026926	MOUSE2_27_PE25	HBG004398
ENSMUSG00000026088	MOUSE1_40_PE4	HBG000636
ENSMUSG00000005609	MOUSE7_114_PE10	HBG063461
ENSMUSG00000031143	MOUSEX_7_PE9	HBG023594
ENSMUSG00000006717	MOUSE13_26_PE12	HBG027614
ENSMUSG00000053801	MOUSE7_47_PE23	HBG004211
ENSMUSG00000068391	MOUSE15_76_PE4	HBG015910
ENSMUSG00000068663	MOUSE16_11_PE15	HBG058517
ENSMUSG00000038268	MOUSE11_78_PE17	HBG017237
ENSMUSG00000026192	MOUSE1_73_PE8	HBG008161
ENSMUSG00000029208	MOUSE5_72_PE4	HBG000018
ENSMUSG00000028576	MOUSE4_96_PE5	HBG017541
ENSMUSG00000030521	MOUSE7_66_PE13	HBG054206
ENSMUSG00000030560	MOUSE7_91_PE2	HBG037842
ENSMUSG00000074576	MOUSE2_170_PE11	HBG000479
ENSMUSG00000071331	MOUSE10_43_PE1	HBG037397
ENSMUSG00000038160	MOUSE10_46_PE1	HBG004567
ENSMUSG00000026618	MOUSE1_191_PE4	HBG007472
ENSMUSG00000037364	MOUSE5_143_PE4	HBG078310
ENSMUSG00000040687	MOUSE2_92_PE29	HBG059040
ENSMUSG00000039632	MOUSE9_23_PE16	HBG024940
ENSMUSG00000030654	MOUSE7_122_PE1	HBG065287
ENSMUSG00000039428	MOUSE7_92_PE1	HBG036735
ENSMUSG00000062590	MOUSE1_90_PE7	HBG037966
ENSMUSG00000027742	MOUSE3_55_PE1	HBG035241
ENSMUSG00000035726	MOUSE14_52_PE22	HBG006460
ENSMUSG00000041740	MOUSE5_119_PE20	HBG009960
ENSMUSG00000035493	MOUSE13_59_PE7	HBG025065
ENSMUSG00000037572	MOUSE14_47_PE11	HBG048500
ENSMUSG00000054752	MOUSE4_55_PE4	HBG058841
ENSMUSG00000025235	MOUSE9_62_PE1	HBG019386
ENSMUSG00000074358	MOUSE7_19_PE11	HBG044106
ENSMUSG00000061029	MOUSE10_13_PE4	HBG001941
ENSMUSG00000026111	MOUSE1_39_PE12	HBG007378
ENSMUSG00000071655	MOUSE19_10_PE1	HBG002381
ENSMUSG00000028447	MOUSE4_43_PE15	HBG076749
ENSMUSG00000031578	MOUSE8_33_PE5	HBG050412
ENSMUSG00000034160	MOUSEX_98_PE21	HBG011376
ENSMUSG00000037683	MOUSE2_20_PE3	HBG020115
ENSMUSG00000028431	MOUSE4_58_PE4	HBG001990
ENSMUSG00000011382	MOUSE7_46_PE71	HBG004969
ENSMUSG00000001100	MOUSE11_81_PE56	HBG007130
ENSMUSG00000017198	MOUSE4_59_PE9	HBG023299
ENSMUSG00000033732	MOUSE8_116_PE5	HBG004836
ENSMUSG00000029695	MOUSE6_25_PE2	HBG009263
ENSMUSG00000020097	MOUSE10_63_PE5	HBG005204
ENSMUSG00000032633	MOUSE11_62_PE11	HBG038461
ENSMUSG00000032410	MOUSE9_99_PE11	HBG003339
ENSMUSG00000024082	MOUSE17_82_PE13	HBG003758
ENSMUSG00000054836	MOUSE9_114_PE23	HBG024996
ENSMUSG00000039318	MOUSE1_191_PE3	HBG020664
ENSMUSG00000038510	MOUSE10_41_PE15	HBG000374
ENSMUSG00000007603	MOUSE17_59_PE26	HBG002386
ENSMUSG00000041377	MOUSE6_120_PE12	HBG068289
ENSMUSG00000020471	MOUSE11_6_PE24	HBG030021
ENSMUSG00000047592	MOUSE5_143_PE56	HBG053276
ENSMUSG00000022429	MOUSE15_83_PE3	HBG081941
ENSMUSG00000008373	MOUSE7_4_PE6	HBG008909
ENSMUSG00000004462	MOUSE16_24_PE2	HBG021752
ENSMUSG00000016833	MOUSE5_104_PE13	HBG068639
ENSMUSG00000032965	MOUSE16_52_PE3	HBG003052
ENSMUSG00000022551	MOUSE15_79_PE52	HBG085168
ENSMUSG00000029535	MOUSE5_119_PE25	HBG004059
ENSMUSG00000041763	MOUSE1_46_PE4	HBG002273
ENSMUSG00000022359	MOUSE15_61_PE8	HBG081865
ENSMUSG00000032459	MOUSE9_102_PE6	HBG021676
ENSMUSG00000003868	MOUSE7_46_PE66	HBG000526
ENSMUSG00000026374	MOUSE1_123_PE1	HBG000250
ENSMUSG00000030610	MOUSE7_81_PE6	HBG002977
ENSMUSG00000034501	MOUSE12_76_PE2	HBG043517
ENSMUSG00000026965	MOUSE2_26_PE25	HBG004088
ENSMUSG00000001366	MOUSE9_81_PE8	HBG000631
ENSMUSG00000025157	MOUSE19_43_PE12	HBG056643
ENSMUSG00000021577	MOUSE13_77_PE23	HBG009050
ENSMUSG00000037172	MOUSE6_42_PE3	HBG020279
ENSMUSG00000038240	MOUSE10_45_PE1	HBG025527
ENSMUSG00000073568	MOUSE18_49_PE13	HBG077604
ENSMUSG00000028405	MOUSE4_41_PE3	HBG059426
ENSMUSG00000033009	MOUSE8_99_PE3	HBG021089
ENSMUSG00000062937	MOUSE4_91_PE20	HBG067943
ENSMUSG00000030036	MOUSE6_82_PE16	HBG018253
ENSMUSG00000073792	MOUSE4_102_PE3	HBG058873
ENSMUSG00000028334	MOUSE4_48_PE2	HBG057573
ENSMUSG00000024797	MOUSE19_7_PE9	HBG005935
ENSMUSG00000024135	MOUSE17_90_PE2	HBG000219
ENSMUSG00000048920	MOUSE7_17_PE4	HBG009287
ENSMUSG00000026123	MOUSE1_37_PE1	HBG077402
ENSMUSG00000022441	MOUSE15_87_PE13	HBG024617
ENSMUSG00000047193	MOUSE9_8_PE1	HBG001488
ENSMUSG00000040374	MOUSE3_6_PE5	HBG046904
ENSMUSG00000055694	MOUSE8_74_PE45	HBG088367
ENSMUSG00000046791	MOUSE12_88_PE8	HBG056445
ENSMUSG00000069835	MOUSE11_72_PE52	HBG007105
ENSMUSG00000049154	MOUSE11_61_PE17	HBG023979
ENSMUSG00000030056	MOUSE6_87_PE12	HBG014930
ENSMUSG00000031485	MOUSE8_29_PE5	HBG005369
ENSMUSG00000027861	MOUSE3_105_PE8	HBG023821
ENSMUSG00000007122	MOUSE1_178_PE17	HBG023821
ENSMUSG00000029601	MOUSE5_124_PE12	HBG020934
ENSMUSG00000020017	MOUSE10_96_PE6	HBG024458
ENSMUSG00000029916	MOUSE6_42_PE2	HBG052871
ENSMUSG00000026989	MOUSE2_60_PE1	HBG059319
ENSMUSG00000007029	MOUSE17_37_PE29	HBG010272
ENSMUSG00000041879	MOUSE1_140_PE10	HBG000341
ENSMUSG00000024831	MOUSE19_4_PE2	HBG023201
ENSMUSG00000027787	MOUSE3_72_PE6	HBG050504
ENSMUSG00000025227	MOUSE19_48_PE1	HBG022833
ENSMUSG00000030877	MOUSE7_124_PE25	HBG022833
ENSMUSG00000062110	MOUSE5_77_PE5	HBG071931
ENSMUSG00000042453	MOUSE5_23_PE1	HBG040894
ENSMUSG00000025049	MOUSE19_48_PE22	HBG002180
ENSMUSG00000038697	MOUSE8_129_PE23	HBG002180
ENSMUSG00000037936	MOUSE5_129_PE13	HBG069509
ENSMUSG00000062373	MOUSE15_61_PE15	HBG049287
ENSMUSG00000036323	MOUSE5_81_PE9	HBG005315
ENSMUSG00000033276	MOUSE1_76_PE28	HBG023388
ENSMUSG00000057134	MOUSE10_69_PE7	HBG003649
ENSMUSG00000036693	MOUSE5_37_PE4	HBG059365
ENSMUSG00000040410	MOUSE4_23_PE12	HBG024352
ENSMUSG00000037376	MOUSE2_134_PE12	HBG057825
ENSMUSG00000029145	MOUSE5_33_PE28	HBG045596
ENSMUSG00000021893	MOUSE14_31_PE34	HBG001043
ENSMUSG00000035769	MOUSE9_124_PE1	HBG010884
ENSMUSG00000025226	MOUSE19_47_PE30	HBG022834
ENSMUSG00000040866	MOUSE7_19_PE19	HBG021132
ENSMUSG00000039552	MOUSE10_35_PE4	HBG021132
ENSMUSG00000059022	MOUSE6_31_PE16	HBG080961
ENSMUSG00000020116	MOUSE11_18_PE10	HBG027779
ENSMUSG00000033628	MOUSE18_32_PE1	HBG010046
ENSMUSG00000000278	MOUSE11_92_PE1	HBG002187
ENSMUSG00000042215	MOUSE1_35_PE5	HBG001735
ENSMUSG00000047539	MOUSE1_188_PE10	HBG008947
ENSMUSG00000032314	MOUSE9_58_PE3	HBG007835
ENSMUSG00000025858	MOUSE5_145_PE4	HBG004694
ENSMUSG00000060152	MOUSE5_119_PE17	HBG059866
ENSMUSG00000069539	MOUSE10_93_PE1	HBG007026
ENSMUSG00000021967	MOUSE14_58_PE15	HBG019993
ENSMUSG00000044308	MOUSE2_70_PE22	HBG054937
ENSMUSG00000034083	MOUSE6_91_PE9	HBG056210
ENSMUSG00000002319	MOUSE14_56_PE23	HBG057822
ENSMUSG00000008958	MOUSE3_98_PE12	HBG008243
ENSMUSG00000073791	MOUSE4_102_PE6	HBG048863
ENSMUSG00000014294	MOUSE18_38_PE21	HBG019414
ENSMUSG00000026095	MOUSE1_55_PE17	HBG001798
ENSMUSG00000040396	MOUSE8_10_PE5	HBG004804
ENSMUSG00000042742	MOUSE6_15_PE2	HBG024166
ENSMUSG00000020636	MOUSE12_30_PE2	HBG008070
ENSMUSG00000068114	MOUSE15_85_PE32	HBG025892
ENSMUSG00000029009	MOUSE4_151_PE23	HBG020687
ENSMUSG00000051154	MOUSE2_19_PE9	HBG021760
ENSMUSG00000038722	MOUSE5_151_PE4	HBG002704
ENSMUSG00000027746	MOUSE3_56_PE3	HBG001611
ENSMUSG00000021468	MOUSE13_55_PE7	HBG051267
ENSMUSG00000041278	MOUSE11_45_PE15	HBG031682
ENSMUSG00000020840	MOUSE11_80_PE4	HBG002861
ENSMUSG00000024462	MOUSE17_39_PE18	HBG002413
ENSMUSG00000024410	MOUSE18_13_PE6	HBG058806
ENSMUSG00000033916	MOUSE7_13_PE8	HBG005153
ENSMUSG00000004843	MOUSE16_68_PE8	HBG005153
ENSMUSG00000037049	MOUSE7_109_PE13	HBG029424
ENSMUSG00000003072	MOUSE10_83_PE21	HBG038882
ENSMUSG00000029490	MOUSE5_112_PE12	HBG038386
ENSMUSG00000002129	MOUSE11_5_PE7	HBG076120
ENSMUSG00000034121	MOUSE11_90_PE36	HBG055525
ENSMUSG00000030347	MOUSE6_127_PE9	HBG033515
ENSMUSG00000006392	MOUSE4_121_PE27	HBG050484
ENSMUSG00000042719	MOUSE5_125_PE23	HBG020941
ENSMUSG00000061244	MOUSE14_49_PE4	HBG000784
ENSMUSG00000032900	MOUSE18_59_PE5	HBG052804
ENSMUSG00000036376	MOUSE13_25_PE10	HBG032851
ENSMUSG00000027828	MOUSE3_67_PE6	HBG002461
ENSMUSG00000022191	MOUSE15_14_PE3	HBG003221
ENSMUSG00000027709	MOUSE3_38_PE3	HBG057908
ENSMUSG00000024892	MOUSE19_5_PE37	HBG057908
ENSMUSG00000022702	MOUSE16_20_PE6	HBG001822
ENSMUSG00000041035	MOUSE19_47_PE3	HBG004478
ENSMUSG00000029407	MOUSE5_96_PE10	HBG000566
ENSMUSG00000022756	MOUSE16_18_PE35	HBG020076
ENSMUSG00000069072	MOUSE3_33_PE6	HBG020076
ENSMUSG00000058351	MOUSE14_31_PE18	HBG051835
ENSMUSG00000026694	MOUSE1_168_PE5	HBG004520
ENSMUSG00000038736	MOUSE15_47_PE1	HBG057735
ENSMUSG00000014873	MOUSE2_28_PE4	HBG045940
ENSMUSG00000006191	MOUSE13_31_PE2	HBG032329
ENSMUSG00000024926	MOUSE19_6_PE38	HBG014413
ENSMUSG00000030801	MOUSE7_132_PE8	HBG014413
ENSMUSG00000026571	MOUSE1_171_PE6	HBG023828
ENSMUSG00000020311	MOUSE11_32_PE7	HBG014365
ENSMUSG00000030376	MOUSE7_16_PE12	HBG055377
ENSMUSG00000021548	MOUSE13_89_PE1	HBG028895
ENSMUSG00000033578	MOUSEX_130_PE12	HBG025915
ENSMUSG00000026171	MOUSE1_76_PE26	HBG009010
ENSMUSG00000020638	MOUSE12_28_PE4	HBG047963
ENSMUSG00000004018	MOUSE11_28_PE2	HBG037301
ENSMUSG00000030098	MOUSE6_91_PE8	HBG069733
ENSMUSG00000027425	MOUSE2_146_PE1	HBG050576
ENSMUSG00000029551	MOUSE5_145_PE22	HBG022724
ENSMUSG00000047656	MOUSE19_8_PE18	HBG023164
ENSMUSG00000018442	MOUSE11_74_PE8	HBG050661
ENSMUSG00000022881	MOUSE16_24_PE13	HBG003806
ENSMUSG00000005102	MOUSE2_120_PE1	HBG001486
ENSMUSG00000030867	MOUSE7_126_PE7	HBG072856
ENSMUSG00000027296	MOUSE2_121_PE12	HBG021196
ENSMUSG00000041528	MOUSE9_112_PE40	HBG070710
ENSMUSG00000048794	MOUSE6_90_PE5	HBG071150
ENSMUSG00000024446	MOUSE17_38_PE43	HBG022345
ENSMUSG00000031951	MOUSE8_117_PE11	HBG038502
ENSMUSG00000027357	MOUSE2_134_PE15	HBG058557
ENSMUSG00000059772	MOUSE7_130_PE29	HBG007082
ENSMUSG00000021215	MOUSE13_4_PE13	HBG050389
ENSMUSG00000066148	MOUSE4_64_PE7	HBG004197
ENSMUSG00000032376	MOUSE9_69_PE17	HBG089307
ENSMUSG00000053483	MOUSE1_177_PE26	HBG089307
ENSMUSG00000000673	MOUSE17_87_PE9	HBG019683
ENSMUSG00000027933	MOUSE3_93_PE33	HBG002868
ENSMUSG00000029155	MOUSE5_76_PE23	HBG024741
ENSMUSG00000063972	MOUSE2_40_PE5	HBG019813
ENSMUSG00000063439	MOUSE7_26_PE38	HBG059594
ENSMUSG00000020863	MOUSE11_97_PE17	HBG056341
ENSMUSG00000050079	MOUSE8_99_PE20	HBG005292
ENSMUSG00000036104	MOUSE1_133_PE1	HBG001888
ENSMUSG00000033931	MOUSE8_132_PE8	HBG038426
ENSMUSG00000022704	MOUSE16_46_PE6	HBG034441
ENSMUSG00000021751	MOUSE14_7_PE12	HBG003408
ENSMUSG00000029098	MOUSE5_38_PE3	HBG003408
ENSMUSG00000028322	MOUSE4_46_PE14	HBG082158
ENSMUSG00000035495	MOUSE4_47_PE12	HBG025332
ENSMUSG00000038683	MOUSE13_43_PE7	HBG067592
ENSMUSG00000034371	MOUSE19_11_PE29	HBG018925
ENSMUSG00000023921	MOUSE17_43_PE6	HBG022339
ENSMUSG00000024827	MOUSE19_31_PE6	HBG015649
ENSMUSG00000026866	MOUSE2_44_PE1	HBG036999
ENSMUSG00000073633	MOUSE1_86_PE6	HBG023421
ENSMUSG00000042487	MOUSE9_78_PE15	HBG051916
ENSMUSG00000070388	MOUSE11_75_PE14	HBG021374
ENSMUSG00000059263	MOUSE7_115_PE2	HBG020534
ENSMUSG00000049439	MOUSE1_63_PE1	HBG024889
ENSMUSG00000022110	MOUSE14_74_PE8	HBG001112
ENSMUSG00000048916	MOUSE3_67_PE7	HBG056678
ENSMUSG00000058709	MOUSE7_28_PE2	HBG042593
ENSMUSG00000047694	MOUSEX_96_PE1	HBG019158
ENSMUSG00000037196	MOUSE17_12_PE1	HBG025594
ENSMUSG00000037349	MOUSE19_8_PE17	HBG056291
ENSMUSG00000024532	MOUSE18_55_PE6	HBG035761
ENSMUSG00000028657	MOUSE4_126_PE3	HBG002728
ENSMUSG00000030291	MOUSE6_147_PE7	HBG007076
ENSMUSG00000015335	MOUSE2_31_PE13	HBG053609
ENSMUSG00000033543	MOUSE9_73_PE4	HBG004502
ENSMUSG00000039480	MOUSE10_35_PE17	HBG057717
ENSMUSG00000028811	MOUSE4_133_PE12	HBG001989
ENSMUSG00000000339	MOUSE3_120_PE1	HBG075552
ENSMUSG00000049285	MOUSE5_143_PE55	HBG022688
ENSMUSG00000024853	MOUSE19_6_PE13	HBG001958
ENSMUSG00000027263	MOUSE2_122_PE36	HBG005393
ENSMUSG00000022721	MOUSE16_19_PE23	HBG061668
ENSMUSG00000039873	MOUSE2_167_PE15	HBG009453
ENSMUSG00000047021	MOUSE1_77_PE3	HBG059332
ENSMUSG00000032078	MOUSE9_48_PE20	HBG041719
ENSMUSG00000039523	MOUSE4_157_PE5	HBG009795
ENSMUSG00000044948	MOUSE19_49_PE13	HBG061730
ENSMUSG00000027203	MOUSE2_126_PE11	HBG050132
ENSMUSG00000026496	MOUSE1_186_PE15	HBG056318
ENSMUSG00000000127	MOUSE17_67_PE1	HBG021971
ENSMUSG00000035278	MOUSE10_83_PE74	HBG024988
ENSMUSG00000042105	MOUSE7_132_PE37	HBG022864
ENSMUSG00000037461	MOUSE1_197_PE21	HBG002106
ENSMUSG00000035310	MOUSE5_104_PE5	HBG011933
ENSMUSG00000060568	MOUSE1_173_PE1	HBG023952
ENSMUSG00000025758	MOUSE3_43_PE1	HBG020847
ENSMUSG00000037720	MOUSE5_69_PE7	HBG010016
ENSMUSG00000029624	MOUSE5_151_PE5	HBG022701
ENSMUSG00000066442	MOUSE9_92_PE14	HBG003451
ENSMUSG00000022214	MOUSE14_56_PE12	HBG032986
ENSMUSG00000058454	MOUSE7_148_PE17	HBG078768
ENSMUSG00000030095	MOUSE6_91_PE3	HBG022244
ENSMUSG00000027324	MOUSE2_120_PE19	HBG028468
ENSMUSG00000026799	MOUSE2_30_PE15	HBG002492
ENSMUSG00000041506	MOUSE9_110_PE27	HBG022182
ENSMUSG00000029012	MOUSE5_23_PE4	HBG010695
ENSMUSG00000036983	MOUSE17_4_PE7	HBG003907
ENSMUSG00000038564	MOUSE5_33_PE38	HBG000812
ENSMUSG00000045854	MOUSE4_34_PE6	HBG072525
ENSMUSG00000028577	MOUSE4_96_PE4	HBG001924
ENSMUSG00000036270	MOUSE8_110_PE52	HBG021046
ENSMUSG00000051329	MOUSE2_91_PE25	HBG020606
ENSMUSG00000033022	MOUSE18_49_PE9	HBG002443
ENSMUSG00000053333	MOUSE1_91_PE1	HBG075639
ENSMUSG00000020697	MOUSE11_85_PE13	HBG011465
ENSMUSG00000014529	MOUSE5_4_PE12	HBG062659
ENSMUSG00000022544	MOUSE16_6_PE9	HBG048917
ENSMUSG00000026219	MOUSE1_86_PE4	HBG007624
ENSMUSG00000035984	MOUSE18_36_PE15	HBG015423
ENSMUSG00000012187	MOUSE1_80_PE7	HBG067566
ENSMUSG00000026174	MOUSE1_76_PE19	HBG056364
ENSMUSG00000015994	MOUSE8_28_PE19	HBG008756
ENSMUSG00000063550	MOUSE7_105_PE37	HBG057524
ENSMUSG00000025534	MOUSE5_135_PE12	HBG008787
ENSMUSG00000033502	MOUSE3_119_PE9	HBG057987
ENSMUSG00000033885	MOUSE14_7_PE9	HBG001719
ENSMUSG00000000776	MOUSE14_71_PE6	HBG025317
ENSMUSG00000020260	MOUSE10_80_PE6	HBG000159
ENSMUSG00000038696	MOUSE2_36_PE1	HBG019495
ENSMUSG00000024312	MOUSE17_36_PE14	HBG001378
ENSMUSG00000052593	MOUSE12_22_PE12	HBG000006
ENSMUSG00000028274	MOUSE4_35_PE1	HBG005758
ENSMUSG00000032905	MOUSE18_49_PE10	HBG020516
ENSMUSG00000037325	MOUSE3_38_PE13	HBG001646
ENSMUSG00000037089	MOUSE17_47_PE15	HBG001227
ENSMUSG00000020873	MOUSE11_98_PE20	HBG001227
ENSMUSG00000066150	MOUSE4_64_PE5	HBG040592
ENSMUSG00000066152	MOUSE4_64_PE1	HBG040592
ENSMUSG00000030451	MOUSE7_58_PE6	HBG004579
ENSMUSG00000029049	MOUSE4_158_PE22	HBG060395
ENSMUSG00000041303	MOUSE1_57_PE1	HBG009049
ENSMUSG00000038225	MOUSE8_49_PE4	HBG043037
ENSMUSG00000027751	MOUSE3_57_PE2	HBG019969
ENSMUSG00000030528	MOUSE7_83_PE22	HBG039940
ENSMUSG00000030243	MOUSE6_143_PE6	HBG039940
ENSMUSG00000024423	MOUSE18_14_PE6	HBG031839
ENSMUSG00000029647	MOUSE5_153_PE11	HBG005965
ENSMUSG00000068882	MOUSE2_70_PE18	HBG005517
ENSMUSG00000019054	MOUSE5_142_PE7	HBG029401
ENSMUSG00000036955	MOUSE10_64_PE24	HBG009667
ENSMUSG00000002812	MOUSE11_63_PE5	HBG005600
ENSMUSG00000028454	MOUSE4_44_PE23	HBG025310
ENSMUSG00000007458	MOUSE6_122_PE8	HBG024550
ENSMUSG00000026112	MOUSE1_39_PE11	HBG008780
ENSMUSG00000025208	MOUSE19_46_PE12	HBG038065
ENSMUSG00000032512	MOUSE9_124_PE8	HBG004853
ENSMUSG00000038816	MOUSE4_58_PE6	HBG008446
ENSMUSG00000029993	MOUSE6_86_PE10	HBG049454
ENSMUSG00000022848	MOUSE16_38_PE1	HBG046526
ENSMUSG00000026887	MOUSE2_37_PE16	HBG040628
ENSMUSG00000044600	MOUSE8_77_PE10	HBG037820
ENSMUSG00000003531	MOUSE16_19_PE15	HBG009035
ENSMUSG00000033845	MOUSE1_5_PE3	HBG053787
ENSMUSG00000020514	MOUSE11_60_PE10	HBG012821
ENSMUSG00000048170	MOUSE7_132_PE40	HBG022863
ENSMUSG00000029464	MOUSE5_126_PE18	HBG007129
ENSMUSG00000028848	MOUSE4_137_PE17	HBG007129
ENSMUSG00000031353	MOUSEX_159_PE3	HBG050222
ENSMUSG00000022889	MOUSE16_88_PE1	HBG001762
ENSMUSG00000004561	MOUSE14_52_PE10	HBG026353
ENSMUSG00000031352	MOUSEX_165_PE7	HBG051548
ENSMUSG00000026239	MOUSE1_90_PE14	HBG005337
ENSMUSG00000052488	MOUSE8_77_PE7	HBG025180
ENSMUSG00000043843	MOUSE7_26_PE19	HBG008962
ENSMUSG00000006958	MOUSE16_21_PE38	HBG021739
ENSMUSG00000034951	MOUSE7_125_PE8	HBG038552
ENSMUSG00000024181	MOUSE17_28_PE2	HBG038583
ENSMUSG00000021376	MOUSE13_49_PE7	HBG078476
ENSMUSG00000019802	MOUSE10_44_PE5	HBG002838
ENSMUSG00000019718	MOUSE12_75_PE6	HBG038645
ENSMUSG00000024735	MOUSE19_12_PE5	HBG004660
ENSMUSG00000025873	MOUSE13_57_PE11	HBG000247
ENSMUSG00000038462	MOUSE13_32_PE4	HBG005519
ENSMUSG00000026784	MOUSE2_24_PE1	HBG080291
ENSMUSG00000059355	MOUSE8_89_PE52	HBG081376
ENSMUSG00000063362	MOUSE8_24_PE2	HBG000181
ENSMUSG00000037851	MOUSE13_52_PE11	HBG005178
ENSMUSG00000056215	MOUSE6_36_PE1	HBG022463
ENSMUSG00000025176	MOUSE19_43_PE17	HBG022811
ENSMUSG00000024887	MOUSE19_33_PE2	HBG002173
ENSMUSG00000075470	MOUSE15_94_PE1	HBG031752
ENSMUSG00000005625	MOUSE3_98_PE10	HBG000150
ENSMUSG00000071856	MOUSE18_47_PE2	HBG058748
ENSMUSG00000038007	MOUSE4_89_PE2	HBG047368
ENSMUSG00000042323	MOUSE14_31_PE14	HBG079418
ENSMUSG00000035064	MOUSE7_124_PE20	HBG022596
ENSMUSG00000024033	MOUSE17_33_PE15	HBG023010
ENSMUSG00000039182	MOUSE13_15_PE13	HBG003972
ENSMUSG00000005142	MOUSE8_89_PE53	HBG001255
ENSMUSG00000028850	MOUSE4_137_PE16	HBG033234
ENSMUSG00000057778	MOUSE11_76_PE2	HBG083507
ENSMUSG00000022562	MOUSE15_79_PE48	HBG000363
ENSMUSG00000054484	MOUSE2_122_PE25	HBG002391
ENSMUSG00000066151	MOUSE4_64_PE2	HBG050870
ENSMUSG00000022243	MOUSE15_12_PE3	HBG023307
ENSMUSG00000039838	MOUSE4_154_PE2	HBG023307
ENSMUSG00000001670	MOUSE8_115_PE10	HBG003489
ENSMUSG00000041236	MOUSE13_20_PE1	HBG009502
ENSMUSG00000026740	MOUSE2_19_PE7	HBG058384
ENSMUSG00000009566	MOUSE2_34_PE2	HBG019843
ENSMUSG00000035944	MOUSE15_89_PE8	HBG067961
ENSMUSG00000026827	MOUSE2_57_PE5	HBG055204
ENSMUSG00000031090	MOUSE7_148_PE16	HBG003039
ENSMUSG00000034023	MOUSE6_113_PE35	HBG047314
ENSMUSG00000027714	MOUSE3_38_PE11	HBG043093
ENSMUSG00000027752	MOUSE3_57_PE4	HBG043093
ENSMUSG00000025785	MOUSE9_127_PE14	HBG043093
ENSMUSG00000040697	MOUSE4_145_PE33	HBG038148
ENSMUSG00000022681	MOUSE16_14_PE13	HBG053266
ENSMUSG00000005262	MOUSE16_20_PE3	HBG003507
ENSMUSG00000029591	MOUSE5_118_PE8	HBG040536
ENSMUSG00000020022	MOUSE10_97_PE6	HBG002396
ENSMUSG00000061981	MOUSE11_81_PE18	HBG010191
ENSMUSG00000059714	MOUSE17_38_PE2	HBG010191
ENSMUSG00000042737	MOUSE3_92_PE27	HBG023761
ENSMUSG00000024993	MOUSE19_63_PE4	HBG012970
ENSMUSG00000026134	MOUSE1_35_PE1	HBG056777
ENSMUSG00000052337	MOUSE6_71_PE3	HBG049357
ENSMUSG00000003660	MOUSE2_128_PE24	HBG016682
ENSMUSG00000038774	MOUSE10_52_PE4	HBG016682
ENSMUSG00000024019	MOUSE17_31_PE27	HBG002108
ENSMUSG00000034456	MOUSE6_89_PE21	HBG024986
ENSMUSG00000031516	MOUSE8_36_PE12	HBG005675
ENSMUSG00000032607	MOUSE9_112_PE49	HBG007120
ENSMUSG00000059734	MOUSE19_4_PE16	HBG074625
ENSMUSG00000003123	MOUSE7_26_PE22	HBG059960
ENSMUSG00000032210	MOUSE9_76_PE8	HBG004454
ENSMUSG00000064280	MOUSE5_22_PE3	HBG024144
ENSMUSG00000058498	MOUSE4_155_PE27	HBG041558
ENSMUSG00000014177	MOUSE11_65_PE15	HBG031348
ENSMUSG00000027342	MOUSE2_133_PE15	HBG010018
ENSMUSG00000056698	MOUSE6_71_PE24	HBG019721
ENSMUSG00000022035	MOUSE14_66_PE12	HBG060898
ENSMUSG00000042444	MOUSE9_74_PE2	HBG087775
ENSMUSG00000030314	MOUSE6_115_PE1	HBG004111
ENSMUSG00000007080	MOUSE5_114_PE14	HBG004902
ENSMUSG00000041064	MOUSE9_68_PE25	HBG009357
ENSMUSG00000034687	MOUSE5_100_PE1	HBG038223
ENSMUSG00000027845	MOUSE3_107_PE7	HBG048394
ENSMUSG00000000028	MOUSE16_20_PE1	HBG044826
ENSMUSG00000004996	MOUSE8_89_PE8	HBG008261
ENSMUSG00000006021	MOUSE7_16_PE11	HBG045214
ENSMUSG00000062963	MOUSE1_177_PE27	HBG001400
ENSMUSG00000046753	MOUSE14_27_PE8	HBG058039
ENSMUSG00000070283	MOUSE9_113_PE5	HBG003355
ENSMUSG00000041809	MOUSE1_22_PE8	HBG047419
ENSMUSG00000025038	MOUSEX_17_PE5	HBG047419
ENSMUSG00000028136	MOUSE3_97_PE23	HBG001061
ENSMUSG00000042198	MOUSE4_4_PE6	HBG061323
ENSMUSG00000006463	MOUSE19_5_PE52	HBG081710
ENSMUSG00000040339	MOUSE3_112_PE19	HBG019838
ENSMUSG00000039157	MOUSE2_33_PE30	HBG019838
ENSMUSG00000019782	MOUSE10_35_PE8	HBG022312
ENSMUSG00000031786	MOUSE8_100_PE4	HBG002602
ENSMUSG00000024537	MOUSE18_70_PE15	HBG001717
ENSMUSG00000040174	MOUSE2_95_PE6	HBG023694
ENSMUSG00000051705	MOUSE9_62_PE13	HBG023335
ENSMUSG00000033752	MOUSE3_87_PE3	HBG021001
ENSMUSG00000004099	MOUSE9_22_PE5	HBG011043
ENSMUSG00000062797	MOUSE7_93_PE6	HBG004539
ENSMUSG00000033644	MOUSE14_71_PE5	HBG069104
ENSMUSG00000020576	MOUSE12_14_PE3	HBG078216
ENSMUSG00000046782	MOUSE12_61_PE1	HBG044652
ENSMUSG00000047045	MOUSEX_138_PE12	HBG035602
ENSMUSG00000025591	MOUSE8_71_PE2	HBG026245
ENSMUSG00000027412	MOUSE2_162_PE7	HBG059280
ENSMUSG00000035171	MOUSE19_22_PE6	HBG016903
ENSMUSG00000031838	MOUSE8_75_PE22	HBG068032
ENSMUSG00000032059	MOUSE9_53_PE21	HBG026417
ENSMUSG00000022680	MOUSE16_14_PE14	HBG072609
ENSMUSG00000029103	MOUSE5_37_PE14	HBG049180
ENSMUSG00000039531	MOUSE10_35_PE6	HBG025502
ENSMUSG00000000916	MOUSE5_140_PE33	HBG005012
ENSMUSG00000062352	MOUSE12_22_PE8	HBG049942
ENSMUSG00000059406	MOUSE10_84_PE1	HBG058622
ENSMUSG00000037149	MOUSE12_14_PE1	HBG004683
ENSMUSG00000031703	MOUSE8_90_PE11	HBG024846
ENSMUSG00000033031	MOUSE16_51_PE10	HBG021653
ENSMUSG00000036769	MOUSEX_24_PE1	HBG010842
ENSMUSG00000025001	MOUSE19_40_PE4	HBG080613
ENSMUSG00000029920	MOUSE6_65_PE3	HBG080613
ENSMUSG00000028702	MOUSE4_119_PE17	HBG080613
ENSMUSG00000036450	MOUSE19_46_PE4	HBG022823
ENSMUSG00000026649	MOUSE1_177_PE12	HBG044539
ENSMUSG00000030647	MOUSE7_100_PE12	HBG001392
ENSMUSG00000038759	MOUSE6_37_PE2	HBG010080
ENSMUSG00000031851	MOUSE8_131_PE7	HBG014639
ENSMUSG00000003527	MOUSE16_19_PE9	HBG003360
ENSMUSG00000043241	MOUSE2_6_PE14	HBG031149
ENSMUSG00000026229	MOUSE1_90_PE4	HBG005015
ENSMUSG00000031959	MOUSE8_116_PE23	HBG048060
ENSMUSG00000034190	MOUSE14_70_PE14	HBG015126
ENSMUSG00000021413	MOUSE13_37_PE2	HBG046333
ENSMUSG00000025982	MOUSE1_57_PE5	HBG005474
ENSMUSG00000002871	MOUSE6_88_PE11	HBG056661
ENSMUSG00000037697	MOUSE14_46_PE4	HBG048873
ENSMUSG00000047921	MOUSE15_76_PE2	HBG037415
ENSMUSG00000064037	MOUSE5_33_PE45	HBG027147
ENSMUSG00000040822	MOUSE14_55_PE24	HBG070999
ENSMUSG00000054309	MOUSE12_22_PE10	HBG002768
ENSMUSG00000029034	MOUSE4_159_PE31	HBG002768
ENSMUSG00000049969	MOUSE4_12_PE1	HBG010056
ENSMUSG00000053604	MOUSE6_70_PE1	HBG081847
ENSMUSG00000041720	MOUSE16_18_PE22	HBG003863
ENSMUSG00000039768	MOUSE4_155_PE3	HBG003411
ENSMUSG00000004789	MOUSE12_89_PE13	HBG004868
ENSMUSG00000042505	MOUSE6_8_PE4	HBG042062
ENSMUSG00000039686	MOUSE2_31_PE14	HBG002197
ENSMUSG00000026974	MOUSE2_26_PE2	HBG021931
ENSMUSG00000022323	MOUSE15_36_PE7	HBG027308
ENSMUSG00000025209	MOUSE19_46_PE13	HBG022824
ENSMUSG00000031954	MOUSE8_117_PE8	HBG013192
ENSMUSG00000023087	MOUSE3_53_PE1	HBG002280
ENSMUSG00000041120	MOUSE4_143_PE5	HBG012297
ENSMUSG00000058729	MOUSE1_186_PE16	HBG001177
ENSMUSG00000037134	MOUSE8_82_PE4	HBG021006
ENSMUSG00000053565	MOUSE7_30_PE1	HBG001516
ENSMUSG00000021241	MOUSE12_89_PE4	HBG043411
ENSMUSG00000010136	MOUSE3_109_PE15	HBG023836
ENSMUSG00000022503	MOUSE16_11_PE8	HBG058238
ENSMUSG00000039183	MOUSE17_26_PE58	HBG058238
ENSMUSG00000035142	MOUSE12_54_PE11	HBG058238
ENSMUSG00000005580	MOUSE16_5_PE5	HBG027063
ENSMUSG00000039128	MOUSE2_6_PE4	HBG047486
ENSMUSG00000021930	MOUSE14_62_PE13	HBG005647
ENSMUSG00000019868	MOUSE10_15_PE4	HBG038785
ENSMUSG00000024841	MOUSE19_6_PE18	HBG071149
ENSMUSG00000026779	MOUSE2_24_PE6	HBG046100
ENSMUSG00000005269	MOUSE15_11_PE3	HBG059256
ENSMUSG00000026335	MOUSE1_102_PE4	HBG038335
ENSMUSG00000024982	MOUSE19_57_PE4	HBG086493
ENSMUSG00000015363	MOUSE15_92_PE14	HBG068792
ENSMUSG00000012519	MOUSE8_116_PE20	HBG048282
ENSMUSG00000021420	MOUSE13_38_PE4	HBG060875
ENSMUSG00000033416	MOUSE10_78_PE11	HBG020980
ENSMUSG00000035572	MOUSE4_46_PE17	HBG012542
ENSMUSG00000024096	MOUSE17_69_PE8	HBG022500
ENSMUSG00000045482	MOUSE5_150_PE13	HBG083932
ENSMUSG00000015027	MOUSE8_128_PE17	HBG040904
ENSMUSG00000031986	MOUSE8_130_PE19	HBG057788
ENSMUSG00000066979	MOUSE7_135_PE21	HBG002471
ENSMUSG00000022836	MOUSE16_37_PE1	HBG021702
ENSMUSG00000039714	MOUSE9_60_PE10	HBG032345
ENSMUSG00000050608	MOUSE4_143_PE6	HBG028828
ENSMUSG00000019863	MOUSE10_45_PE10	HBG004866
ENSMUSG00000036046	MOUSE15_88_PE13	HBG048586
ENSMUSG00000021737	MOUSE14_13_PE8	HBG075836
ENSMUSG00000038957	MOUSE9_60_PE16	HBG007501
ENSMUSG00000026966	MOUSE2_26_PE24	HBG011279
ENSMUSG00000003135	MOUSE1_41_PE10	HBG003708
ENSMUSG00000026036	MOUSE1_61_PE5	HBG026546
ENSMUSG00000027569	MOUSE2_183_PE14	HBG048136
ENSMUSG00000029016	MOUSE4_151_PE19	HBG002529
ENSMUSG00000036636	MOUSE17_27_PE2	HBG002529
ENSMUSG00000002320	MOUSE14_56_PE24	HBG056737
ENSMUSG00000025016	MOUSE19_42_PE14	HBG056737
ENSMUSG00000068040	MOUSE2_155_PE5	HBG056737
ENSMUSG00000004667	MOUSE10_83_PE13	HBG009937
ENSMUSG00000025533	MOUSE5_135_PE14	HBG005285
ENSMUSG00000042298	MOUSE11_64_PE19	HBG004362
ENSMUSG00000025234	MOUSE9_62_PE2	HBG039042
ENSMUSG00000031068	MOUSE7_141_PE6	HBG026003
ENSMUSG00000026895	MOUSE2_37_PE11	HBG006513
ENSMUSG00000035919	MOUSE9_24_PE1	HBG025116
ENSMUSG00000039427	MOUSE16_6_PE7	HBG005406
ENSMUSG00000003808	MOUSE8_89_PE26	HBG004993
ENSMUSG00000026894	MOUSE2_37_PE12	HBG046390
ENSMUSG00000029550	MOUSE5_119_PE9	HBG016356
ENSMUSG00000025024	MOUSE19_55_PE7	HBG092539
ENSMUSG00000026553	MOUSE1_178_PE8	HBG010024
ENSMUSG00000036315	MOUSE17_39_PE12	HBG033853
ENSMUSG00000024369	MOUSE17_37_PE11	HBG083312
ENSMUSG00000028700	MOUSE4_119_PE19	HBG023960
ENSMUSG00000026869	MOUSE2_36_PE11	HBG057918
ENSMUSG00000021235	MOUSE12_88_PE28	HBG005698
ENSMUSG00000030532	MOUSE7_83_PE15	HBG032176
ENSMUSG00000032769	MOUSE1_16_PE5	HBG003774
ENSMUSG00000022757	MOUSE16_59_PE15	HBG059258
ENSMUSG00000012117	MOUSE4_137_PE26	HBG001440
ENSMUSG00000007338	MOUSE19_7_PE5	HBG052655
ENSMUSG00000028589	MOUSE4_148_PE15	HBG046219
ENSMUSG00000026339	MOUSE1_126_PE3	HBG002555
ENSMUSG00000030492	MOUSE7_36_PE13	HBG088408
ENSMUSG00000031916	MOUSE8_112_PE3	HBG003315
ENSMUSG00000027699	MOUSE3_28_PE3	HBG038264
ENSMUSG00000032279	MOUSE9_57_PE4	HBG063108
ENSMUSG00000026431	MOUSE1_139_PE21	HBG058681
ENSMUSG00000029671	MOUSE6_24_PE2	HBG069724
ENSMUSG00000028709	MOUSE4_119_PE4	HBG086513
ENSMUSG00000027074	MOUSE2_86_PE7	HBG057085
ENSMUSG00000034748	MOUSE10_84_PE53	HBG057722
ENSMUSG00000002728	MOUSE2_147_PE5	HBG024780
ENSMUSG00000035824	MOUSE8_109_PE4	HBG019642
ENSMUSG00000040812	MOUSE2_92_PE5	HBG058650
ENSMUSG00000029165	MOUSE5_33_PE5	HBG058650
ENSMUSG00000061298	MOUSE4_114_PE1	HBG058650
ENSMUSG00000034450	MOUSE14_66_PE16	HBG024446
ENSMUSG00000039990	MOUSE7_137_PE12	HBG002224
ENSMUSG00000030763	MOUSE7_127_PE8	HBG000571
ENSMUSG00000003438	MOUSE7_29_PE14	HBG021186
ENSMUSG00000056076	MOUSE5_146_PE8	HBG002645
ENSMUSG00000024493	MOUSE18_44_PE8	HBG001781
ENSMUSG00000025027	MOUSE19_54_PE3	HBG010334
ENSMUSG00000037005	MOUSEX_45_PE9	HBG010334
ENSMUSG00000031730	MOUSE8_114_PE10	HBG001447
ENSMUSG00000028840	MOUSE4_138_PE3	HBG005559
ENSMUSG00000039577	MOUSE4_156_PE5	HBG020717
ENSMUSG00000002718	MOUSE2_169_PE7	HBG003312
ENSMUSG00000000326	MOUSE16_19_PE27	HBG059199
ENSMUSG00000022206	MOUSE15_13_PE1	HBG053925
ENSMUSG00000037573	MOUSE11_97_PE14	HBG021412
ENSMUSG00000050563	MOUSE4_93_PE1	HBG063515
ENSMUSG00000031922	MOUSE9_14_PE6	HBG020633
ENSMUSG00000056167	MOUSE9_119_PE5	HBG019148
ENSMUSG00000026558	MOUSE1_173_PE3	HBG003540
ENSMUSG00000039357	MOUSE14_20_PE30	HBG062042
ENSMUSG00000046152	MOUSE8_33_PE6	HBG062042
ENSMUSG00000029111	MOUSE5_36_PE23	HBG012652
ENSMUSG00000075543	MOUSE5_153_PE6	HBG003121
ENSMUSG00000027953	MOUSE3_92_PE28	HBG061291
ENSMUSG00000020832	MOUSE11_81_PE22	HBG044994
ENSMUSG00000029387	MOUSE5_129_PE2	HBG009234
ENSMUSG00000041429	MOUSE17_26_PE34	HBG022748
ENSMUSG00000050229	MOUSE1_178_PE26	HBG003418
ENSMUSG00000031821	MOUSE8_126_PE3	HBG013959
ENSMUSG00000022089	MOUSE14_70_PE19	HBG025322
ENSMUSG00000012443	MOUSE19_38_PE10	HBG038057
ENSMUSG00000015668	MOUSEX_97_PE9	HBG023569
ENSMUSG00000022407	MOUSE15_84_PE7	HBG007167
ENSMUSG00000021025	MOUSE12_58_PE12	HBG022329
ENSMUSG00000056436	MOUSE2_77_PE6	HBG067553
ENSMUSG00000047940	MOUSE3_143_PE4	HBG050968
ENSMUSG00000033429	MOUSE7_66_PE15	HBG026120
ENSMUSG00000026955	MOUSE2_26_PE34	HBG085981
ENSMUSG00000004994	MOUSE8_89_PE10	HBG027760
ENSMUSG00000024359	MOUSE18_37_PE8	HBG087501
ENSMUSG00000032932	MOUSE16_79_PE1	HBG087501
ENSMUSG00000032115	MOUSE9_46_PE27	HBG087501
ENSMUSG00000045107	MOUSE14_19_PE9	HBG002122
ENSMUSG00000009076	MOUSE11_5_PE21	HBG053462
ENSMUSG00000041939	MOUSE5_118_PE17	HBG001790
ENSMUSG00000029547	MOUSE5_145_PE19	HBG040444
ENSMUSG00000030825	MOUSE7_46_PE80	HBG076949
ENSMUSG00000032042	MOUSE9_37_PE10	HBG001320
ENSMUSG00000027472	MOUSE2_155_PE1	HBG013127
ENSMUSG00000022707	MOUSE16_73_PE2	HBG021630
ENSMUSG00000020464	MOUSE11_30_PE6	HBG001487
ENSMUSG00000052395	MOUSE14_30_PE13	HBG030950
ENSMUSG00000027676	MOUSE3_36_PE1	HBG003014
ENSMUSG00000018068	MOUSE11_89_PE5	HBG007433
ENSMUSG00000049482	MOUSE8_128_PE10	HBG050359
ENSMUSG00000052139	MOUSE5_34_PE5	HBG057352
ENSMUSG00000003402	MOUSE9_23_PE17	HBG008120
ENSMUSG00000018651	MOUSE11_87_PE5	HBG024825
ENSMUSG00000029196	MOUSE5_38_PE16	HBG024825
ENSMUSG00000014355	MOUSE2_130_PE4	HBG000088
ENSMUSG00000041426	MOUSE1_55_PE9	HBG004196
ENSMUSG00000024231	MOUSE18_4_PE7	HBG026015
ENSMUSG00000032030	MOUSE9_56_PE5	HBG026015
ENSMUSG00000017858	MOUSE2_165_PE6	HBG005155
ENSMUSG00000043252	MOUSE4_16_PE2	HBG038097
ENSMUSG00000022142	MOUSE15_9_PE2	HBG018220
ENSMUSG00000027099	MOUSE2_75_PE19	HBG005293
ENSMUSG00000001942	MOUSE9_39_PE18	HBG023119
ENSMUSG00000071073	MOUSE17_48_PE13	HBG069167
ENSMUSG00000020841	MOUSE11_80_PE1	HBG007176
ENSMUSG00000037916	MOUSE19_5_PE4	HBG002628
ENSMUSG00000025817	MOUSE2_6_PE6	HBG024901
ENSMUSG00000025484	MOUSE7_145_PE20	HBG002311
ENSMUSG00000002249	MOUSE17_30_PE20	HBG013462
ENSMUSG00000029466	MOUSE5_126_PE20	HBG007789
ENSMUSG00000062376	MOUSE19_48_PE13	HBG002006
ENSMUSG00000006464	MOUSE19_5_PE53	HBG003646
ENSMUSG00000000884	MOUSE16_19_PE30	HBG020996
ENSMUSG00000002221	MOUSE5_29_PE4	HBG047919
ENSMUSG00000047284	MOUSE11_73_PE12	HBG015699
ENSMUSG00000036968	MOUSE5_143_PE53	HBG000332
ENSMUSG00000064120	MOUSE17_51_PE2	HBG056347
ENSMUSG00000032563	MOUSE9_109_PE4	HBG047055
ENSMUSG00000020284	MOUSE10_81_PE2	HBG079082
ENSMUSG00000024507	MOUSE18_52_PE5	HBG002159
ENSMUSG00000054237	MOUSE19_39_PE11	HBG056726
ENSMUSG00000052955	MOUSE6_54_PE5	HBG057166
ENSMUSG00000032251	MOUSE9_86_PE1	HBG084402
ENSMUSG00000024505	MOUSE18_52_PE1	HBG004877
ENSMUSG00000009535	MOUSE18_71_PE10	HBG022498
ENSMUSG00000003623	MOUSE5_10_PE4	HBG058303
ENSMUSG00000030706	MOUSE7_104_PE12	HBG078613
ENSMUSG00000032401	MOUSE9_67_PE2	HBG056431
ENSMUSG00000024905	MOUSE19_4_PE6	HBG008948
ENSMUSG00000033096	MOUSE2_152_PE11	HBG020153
ENSMUSG00000028180	MOUSE3_161_PE4	HBG052805
ENSMUSG00000042751	MOUSE1_158_PE1	HBG002777
ENSMUSG00000023330	MOUSE2_127_PE11	HBG021876
ENSMUSG00000025823	MOUSE6_48_PE3	HBG000754
ENSMUSG00000035351	MOUSE10_91_PE10	HBG003765
ENSMUSG00000025815	MOUSE2_6_PE11	HBG001030
ENSMUSG00000033439	MOUSE3_120_PE5	HBG043924
ENSMUSG00000044847	MOUSE11_48_PE3	HBG050111
ENSMUSG00000033793	MOUSE1_6_PE2	HBG001823
ENSMUSG00000021322	MOUSE13_22_PE3	HBG024169
ENSMUSG00000026082	MOUSE1_40_PE10	HBG037289
ENSMUSG00000032604	MOUSE9_113_PE1	HBG010035
ENSMUSG00000030279	MOUSE6_143_PE21	HBG024508
ENSMUSG00000006818	MOUSE17_14_PE22	HBG016726
ENSMUSG00000033557	MOUSE1_161_PE20	HBG045941
ENSMUSG00000028896	MOUSE4_136_PE6	HBG029616
ENSMUSG00000002769	MOUSE17_48_PE43	HBG007055
ENSMUSG00000063605	MOUSE8_99_PE31	HBG068513
ENSMUSG00000041638	MOUSE5_119_PE34	HBG048003
ENSMUSG00000006412	MOUSE1_177_PE32	HBG006163
ENSMUSG00000021549	MOUSE13_89_PE2	HBG005417
ENSMUSG00000027253	MOUSE2_92_PE42	HBG095634
ENSMUSG00000039007	MOUSE15_35_PE1	HBG007609
ENSMUSG00000049960	MOUSE14_20_PE12	HBG055989
ENSMUSG00000020128	MOUSE11_22_PE4	HBG003376
ENSMUSG00000025200	MOUSE19_45_PE15	HBG068058
ENSMUSG00000032103	MOUSE9_37_PE17	HBG000515
ENSMUSG00000015790	MOUSE2_28_PE3	HBG002995
ENSMUSG00000002835	MOUSE17_58_PE18	HBG071937
ENSMUSG00000001524	MOUSE17_37_PE85	HBG001734
ENSMUSG00000040383	MOUSE2_115_PE9	HBG007834
ENSMUSG00000025916	MOUSE1_11_PE3	HBG058193
ENSMUSG00000019139	MOUSE8_75_PE11	HBG004921
ENSMUSG00000042729	MOUSE19_9_PE13	HBG033968
ENSMUSG00000046295	MOUSE8_76_PE9	HBG016754
ENSMUSG00000071669	MOUSE16_12_PE9	HBG059867
ENSMUSG00000024644	MOUSE18_88_PE6	HBG046792
ENSMUSG00000038991	MOUSE13_40_PE12	HBG004695
ENSMUSG00000030888	MOUSE7_109_PE24	HBG001909
ENSMUSG00000024346	MOUSE18_38_PE7	HBG004225
ENSMUSG00000054196	MOUSE15_41_PE2	HBG048410
ENSMUSG00000039615	MOUSE17_27_PE40	HBG009402
ENSMUSG00000037553	MOUSE4_137_PE19	HBG039832
ENSMUSG00000054889	MOUSE13_40_PE9	HBG088533
ENSMUSG00000040794	MOUSE2_92_PE8	HBG037637
ENSMUSG00000022477	MOUSE15_85_PE16	HBG005541
ENSMUSG00000014771	MOUSE17_17_PE10	HBG005933
ENSMUSG00000022307	MOUSE15_44_PE2	HBG056754
ENSMUSG00000066036	MOUSE4_143_PE17	HBG002938
ENSMUSG00000032534	MOUSE9_106_PE11	HBG070379
ENSMUSG00000032383	MOUSE9_69_PE5	HBG067620
ENSMUSG00000024007	MOUSE17_31_PE15	HBG067620
ENSMUSG00000028857	MOUSE4_137_PE6	HBG008862
ENSMUSG00000003199	MOUSE17_58_PE15	HBG024974
ENSMUSG00000010045	MOUSE9_112_PE1	HBG000396
ENSMUSG00000021311	MOUSE13_13_PE5	HBG028058
ENSMUSG00000019986	MOUSE10_22_PE2	HBG049928
ENSMUSG00000038039	MOUSE10_60_PE11	HBG046428
ENSMUSG00000070953	MOUSE2_36_PE6	HBG051171
ENSMUSG00000020895	MOUSE11_72_PE16	HBG023455
ENSMUSG00000039958	MOUSE6_150_PE3	HBG002073
ENSMUSG00000026107	MOUSE1_54_PE1	HBG050426
ENSMUSG00000073733	MOUSE4_145_PE14	HBG023484
ENSMUSG00000042770	MOUSE6_135_PE22	HBG070136
ENSMUSG00000024740	MOUSE19_11_PE30	HBG004638
ENSMUSG00000045624	MOUSE2_142_PE6	HBG058872
ENSMUSG00000002105	MOUSE2_92_PE21	HBG076243
ENSMUSG00000061322	MOUSE4_43_PE10	HBG009286
ENSMUSG00000032437	MOUSE9_119_PE19	HBG000218
ENSMUSG00000032116	MOUSE9_38_PE8	HBG000218
ENSMUSG00000040706	MOUSE4_145_PE32	HBG077403
ENSMUSG00000050796	MOUSE4_159_PE37	HBG038484
ENSMUSG00000014243	MOUSE11_64_PE16	HBG038455
ENSMUSG00000037257	MOUSE9_66_PE8	HBG047337
ENSMUSG00000029283	MOUSE5_110_PE9	HBG046905
ENSMUSG00000026820	MOUSE2_33_PE26	HBG068493
ENSMUSG00000030126	MOUSE6_116_PE16	HBG008076
ENSMUSG00000026707	MOUSE2_16_PE3	HBG020126
ENSMUSG00000038335	MOUSE11_78_PE9	HBG000391
ENSMUSG00000033356	MOUSE15_98_PE2	HBG046388
ENSMUSG00000015890	MOUSE10_96_PE7	HBG024459
ENSMUSG00000042410	MOUSE2_76_PE6	HBG002702
ENSMUSG00000000759	MOUSE8_13_PE5	HBG003142
ENSMUSG00000042707	MOUSE4_128_PE20	HBG036128
ENSMUSG00000042831	MOUSE7_31_PE22	HBG030302
ENSMUSG00000022195	MOUSE15_14_PE1	HBG001972
ENSMUSG00000046854	MOUSE2_33_PE35	HBG051083
ENSMUSG00000030045	MOUSE6_81_PE2	HBG000264
ENSMUSG00000031379	MOUSEX_160_PE13	HBG021693
ENSMUSG00000027775	MOUSE3_70_PE5	HBG001424
ENSMUSG00000023826	MOUSE17_13_PE1	HBG039608
ENSMUSG00000028653	MOUSE4_126_PE10	HBG027151
ENSMUSG00000028294	MOUSE4_36_PE7	HBG046032
ENSMUSG00000053111	MOUSE7_138_PE5	HBG024857
ENSMUSG00000034292	MOUSE1_96_PE2	HBG049636
ENSMUSG00000063904	MOUSE19_5_PE55	HBG005003
ENSMUSG00000045039	MOUSE7_26_PE20	HBG037714
ENSMUSG00000019984	MOUSE10_26_PE2	HBG006116
ENSMUSG00000040034	MOUSE10_8_PE8	HBG025172
ENSMUSG00000024424	MOUSE18_13_PE10	HBG017665
ENSMUSG00000063884	MOUSE6_71_PE5	HBG004222
ENSMUSG00000017286	MOUSE11_79_PE12	HBG011228
ENSMUSG00000032705	MOUSE12_84_PE4	HBG059971
ENSMUSG00000038286	MOUSE13_36_PE8	HBG007581
ENSMUSG00000031889	MOUSE8_110_PE8	HBG003338
ENSMUSG00000023707	MOUSE5_128_PE12	HBG020889
ENSMUSG00000024384	MOUSE18_34_PE4	HBG089604
ENSMUSG00000032299	MOUSE9_59_PE17	HBG075702
ENSMUSG00000032388	MOUSE9_68_PE20	HBG019380
ENSMUSG00000021079	MOUSE12_74_PE11	HBG078682
ENSMUSG00000010517	MOUSE4_113_PE1	HBG006299
ENSMUSG00000028468	MOUSE4_45_PE7	HBG000375
ENSMUSG00000024966	MOUSE19_8_PE21	HBG014358
ENSMUSG00000031637	MOUSE8_48_PE11	HBG022923
ENSMUSG00000034192	MOUSE6_91_PE6	HBG037838
ENSMUSG00000008540	MOUSE6_138_PE9	HBG075008
ENSMUSG00000063931	MOUSE7_36_PE1	HBG003432
ENSMUSG00000070000	MOUSE8_76_PE34	HBG070337
ENSMUSG00000039048	MOUSE9_37_PE9	HBG023122
ENSMUSG00000022519	MOUSE16_5_PE7	HBG022762
ENSMUSG00000021112	MOUSE12_82_PE4	HBG071201
ENSMUSG00000020444	MOUSE11_61_PE48	HBG071201
ENSMUSG00000012126	MOUSE4_137_PE32	HBG088459
ENSMUSG00000024683	MOUSE19_12_PE42	HBG006868
ENSMUSG00000041438	MOUSE8_111_PE28	HBG001863
ENSMUSG00000021499	MOUSE13_58_PE27	HBG047069
ENSMUSG00000004233	MOUSE3_102_PE8	HBG008749
ENSMUSG00000032264	MOUSE9_51_PE8	HBG020487
ENSMUSG00000053898	MOUSE7_29_PE43	HBG044445
ENSMUSG00000061455	MOUSE4_49_PE6	HBG037340
ENSMUSG00000064127	MOUSEX_12_PE8	HBG004217
ENSMUSG00000035069	MOUSE4_106_PE11	HBG044024
ENSMUSG00000024069	MOUSE17_77_PE10	HBG058963
ENSMUSG00000027642	MOUSE2_159_PE12	HBG059427
ENSMUSG00000060268	MOUSE4_120_PE26	HBG026345
ENSMUSG00000004821	MOUSE5_112_PE26	HBG079556
ENSMUSG00000030720	MOUSE7_130_PE20	HBG007806
ENSMUSG00000059278	MOUSE11_72_PE39	HBG078316
ENSMUSG00000024134	MOUSE17_89_PE7	HBG044494
ENSMUSG00000050891	MOUSE15_61_PE19	HBG017681
ENSMUSG00000050144	MOUSE3_91_PE35	HBG000141
ENSMUSG00000024666	MOUSE19_11_PE25	HBG003054
ENSMUSG00000027378	MOUSE2_129_PE20	HBG037569
ENSMUSG00000032485	MOUSE9_114_PE26	HBG001360
ENSMUSG00000031386	MOUSEX_71_PE43	HBG003435
ENSMUSG00000030738	MOUSE7_130_PE17	HBG003847
ENSMUSG00000046314	MOUSE12_47_PE1	HBG022013
ENSMUSG00000028671	MOUSE4_139_PE27	HBG002162
ENSMUSG00000041923	MOUSE18_24_PE5	HBG022472
ENSMUSG00000028369	MOUSE4_60_PE4	HBG037347
ENSMUSG00000006585	MOUSE8_128_PE15	HBG059090
ENSMUSG00000050103	MOUSE12_39_PE2	HBG039475
ENSMUSG00000022400	MOUSE15_85_PE3	HBG069314
ENSMUSG00000004815	MOUSE5_112_PE19	HBG014484
ENSMUSG00000021257	MOUSE12_91_PE2	HBG022989
ENSMUSG00000000751	MOUSE11_78_PE19	HBG008160
ENSMUSG00000021044	MOUSE12_92_PE13	HBG026084
ENSMUSG00000022550	MOUSE15_80_PE7	HBG026084
ENSMUSG00000038252	MOUSE6_125_PE49	HBG000478
ENSMUSG00000053965	MOUSE3_126_PE5	HBG087302
ENSMUSG00000023868	MOUSE17_10_PE2	HBG087302
ENSMUSG00000030653	MOUSE7_105_PE8	HBG087302
ENSMUSG00000035062	MOUSEX_92_PE6	HBG019356
ENSMUSG00000030884	MOUSE7_124_PE13	HBG052568
ENSMUSG00000050822	MOUSE5_148_PE11	HBG022719
ENSMUSG00000024194	MOUSE17_28_PE26	HBG027047
ENSMUSG00000052997	MOUSE7_35_PE7	HBG009265
ENSMUSG00000006005	MOUSE1_155_PE8	HBG045481
ENSMUSG00000021497	MOUSE13_58_PE24	HBG025064
ENSMUSG00000024376	MOUSE18_36_PE1	HBG088385
ENSMUSG00000028906	MOUSE4_135_PE11	HBG088385
ENSMUSG00000023980	MOUSE17_49_PE19	HBG058053
ENSMUSG00000068921	MOUSE3_92_PE7	HBG027885
ENSMUSG00000021519	MOUSE13_70_PE7	HBG026510
ENSMUSG00000052406	MOUSE2_28_PE7	HBG023777
ENSMUSG00000005131	MOUSE9_55_PE8	HBG026029
ENSMUSG00000032551	MOUSE9_127_PE7	HBG022137
ENSMUSG00000026611	MOUSE1_193_PE2	HBG020662
ENSMUSG00000022471	MOUSE15_85_PE27	HBG056639
ENSMUSG00000028096	MOUSE3_100_PE5	HBG068149
ENSMUSG00000025894	MOUSE9_5_PE2	HBG022556
ENSMUSG00000024240	MOUSE18_7_PE5	HBG023316
ENSMUSG00000040667	MOUSE11_74_PE4	HBG021335
ENSMUSG00000032392	MOUSE9_68_PE10	HBG003170
ENSMUSG00000042596	MOUSE1_20_PE4	HBG002097
ENSMUSG00000026735	MOUSE2_20_PE5	HBG020114
ENSMUSG00000031007	MOUSEX_12_PE4	HBG076114
ENSMUSG00000045435	MOUSE5_21_PE4	HBG005611
ENSMUSG00000056536	MOUSE1_110_PE2	HBG065553
ENSMUSG00000030316	MOUSE6_115_PE3	HBG007957
ENSMUSG00000031862	MOUSE8_74_PE11	HBG004397
ENSMUSG00000033210	MOUSE16_48_PE4	HBG048205
ENSMUSG00000020150	MOUSE10_83_PE30	HBG076907
ENSMUSG00000050668	MOUSE17_82_PE7	HBG037567
ENSMUSG00000030979	MOUSE7_138_PE1	HBG004346
ENSMUSG00000030591	MOUSE7_30_PE12	HBG004893
ENSMUSG00000051235	MOUSE12_12_PE4	HBG007253
ENSMUSG00000060798	MOUSE3_42_PE3	HBG046187
ENSMUSG00000029599	MOUSE5_124_PE15	HBG058832
ENSMUSG00000022174	MOUSE14_55_PE1	HBG082324
ENSMUSG00000029191	MOUSE5_67_PE11	HBG047138
ENSMUSG00000037270	MOUSE3_39_PE2	HBG070171
ENSMUSG00000040175	MOUSE17_59_PE22	HBG053906
ENSMUSG00000001376	MOUSE6_4_PE5	HBG010937
ENSMUSG00000020664	MOUSE12_33_PE3	HBG060093
ENSMUSG00000070883	MOUSE2_70_PE14	HBG050776
ENSMUSG00000015757	MOUSE10_8_PE14	HBG010124
ENSMUSG00000023393	MOUSE2_183_PE24	HBG001773
ENSMUSG00000006179	MOUSE13_23_PE57	HBG030962
ENSMUSG00000014769	MOUSE17_17_PE6	HBG003331
ENSMUSG00000020899	MOUSE11_72_PE10	HBG001005
ENSMUSG00000028457	MOUSE4_44_PE28	HBG037335
ENSMUSG00000012535	MOUSE6_31_PE19	HBG028715
ENSMUSG00000070939	MOUSE1_45_PE6	HBG019904
ENSMUSG00000060679	MOUSE1_45_PE2	HBG027570
ENSMUSG00000022223	MOUSE14_56_PE47	HBG005092
ENSMUSG00000024640	MOUSE19_17_PE1	HBG008112
ENSMUSG00000022414	MOUSE15_83_PE32	HBG007401
ENSMUSG00000037627	MOUSE15_38_PE3	HBG037443
ENSMUSG00000075229	MOUSE16_38_PE11	HBG005881
ENSMUSG00000022031	MOUSE14_66_PE6	HBG001774
ENSMUSG00000028218	MOUSE4_13_PE7	HBG020424
ENSMUSG00000029388	MOUSE5_129_PE1	HBG007698
ENSMUSG00000030942	MOUSE7_123_PE12	HBG004839
ENSMUSG00000032872	MOUSE9_90_PE17	HBG031853
ENSMUSG00000028955	MOUSE4_154_PE10	HBG080920
ENSMUSG00000057147	MOUSE2_116_PE2	HBG019429
ENSMUSG00000042043	MOUSE13_99_PE6	HBG061340
ENSMUSG00000029469	MOUSE5_126_PE24	HBG020887
ENSMUSG00000022802	MOUSE16_35_PE1	HBG001949
ENSMUSG00000046312	MOUSE4_43_PE5	HBG037332
ENSMUSG00000030330	MOUSE6_125_PE40	HBG075235
ENSMUSG00000052738	MOUSE6_72_PE5	HBG019110
ENSMUSG00000042502	MOUSE7_131_PE22	HBG005044
ENSMUSG00000040820	MOUSE16_97_PE11	HBG038186
ENSMUSG00000022013	MOUSE14_78_PE9	HBG067482
ENSMUSG00000026499	MOUSE1_187_PE1	HBG026490
ENSMUSG00000037355	MOUSE5_35_PE17	HBG024810
ENSMUSG00000005220	MOUSE5_75_PE7	HBG022648
ENSMUSG00000037617	MOUSE15_38_PE7	HBG037444
ENSMUSG00000032840	MOUSE5_122_PE9	HBG066833
ENSMUSG00000024169	MOUSE17_26_PE71	HBG054356
ENSMUSG00000031527	MOUSE8_37_PE7	HBG019323
ENSMUSG00000027431	MOUSE2_146_PE11	HBG056871
ENSMUSG00000058492	MOUSE3_159_PE7	HBG056871
ENSMUSG00000049904	MOUSE11_23_PE5	HBG019742
ENSMUSG00000037119	MOUSE15_61_PE12	HBG048202
ENSMUSG00000024383	MOUSE18_34_PE8	HBG069152
ENSMUSG00000007777	MOUSE11_54_PE9	HBG068405
ENSMUSG00000020553	MOUSE11_93_PE1	HBG054387
ENSMUSG00000022442	MOUSE15_87_PE4	HBG019827
ENSMUSG00000036745	MOUSE3_151_PE3	HBG019827
ENSMUSG00000026307	MOUSE1_95_PE19	HBG046627
ENSMUSG00000040282	MOUSE2_117_PE1	HBG061605
ENSMUSG00000025876	MOUSE13_57_PE20	HBG022951
ENSMUSG00000030788	MOUSE7_114_PE6	HBG010593
ENSMUSG00000024287	MOUSE18_11_PE1	HBG028479
ENSMUSG00000035772	MOUSE2_29_PE10	HBG040642
ENSMUSG00000063235	MOUSE2_92_PE11	HBG029658
ENSMUSG00000017664	MOUSE2_167_PE30	HBG041463
ENSMUSG00000026356	MOUSE1_133_PE12	HBG052024
ENSMUSG00000024587	MOUSE18_67_PE10	HBG052024
ENSMUSG00000018995	MOUSE7_100_PE4	HBG052024
ENSMUSG00000031669	MOUSE8_100_PE22	HBG021086
ENSMUSG00000035697	MOUSE10_83_PE11	HBG058608
ENSMUSG00000028099	MOUSE3_100_PE1	HBG002483
ENSMUSG00000033940	MOUSE6_113_PE39	HBG003564
ENSMUSG00000053774	MOUSE16_34_PE12	HBG021699
ENSMUSG00000039754	MOUSE5_141_PE24	HBG009691
ENSMUSG00000001761	MOUSE6_31_PE21	HBG048652
ENSMUSG00000063511	MOUSE7_46_PE61	HBG037697
ENSMUSG00000028690	MOUSE4_120_PE2	HBG029096
ENSMUSG00000033379	MOUSE4_121_PE10	HBG009586
ENSMUSG00000039828	MOUSE15_9_PE1	HBG038423
ENSMUSG00000022204	MOUSE14_55_PE41	HBG003134
ENSMUSG00000037291	MOUSE3_39_PE1	HBG047219
ENSMUSG00000057228	MOUSE8_65_PE3	HBG016759
ENSMUSG00000041180	MOUSE19_37_PE10	HBG049988
ENSMUSG00000011306	MOUSE8_74_PE26	HBG025178
ENSMUSG00000057816	MOUSE5_102_PE1	HBG062721
ENSMUSG00000028381	MOUSE4_61_PE10	HBG000757
ENSMUSG00000024947	MOUSE19_7_PE28	HBG001117
ENSMUSG00000036430	MOUSE17_49_PE3	HBG001820
ENSMUSG00000022422	MOUSE15_58_PE2	HBG003307
ENSMUSG00000067148	MOUSE17_48_PE11	HBG002547
ENSMUSG00000056342	MOUSE11_24_PE13	HBG007678
ENSMUSG00000024785	MOUSE19_30_PE10	HBG002126
ENSMUSG00000027810	MOUSE3_60_PE9	HBG003010
ENSMUSG00000029233	MOUSE5_80_PE6	HBG026198
ENSMUSG00000018923	MOUSE11_73_PE58	HBG000916
ENSMUSG00000026048	MOUSE1_46_PE12	HBG053629
ENSMUSG00000031935	MOUSE9_16_PE9	HBG004285
ENSMUSG00000030850	MOUSE7_134_PE5	HBG031548
ENSMUSG00000064341	MOUSEMT_1_PE1	HBG011058
ENSMUSG00000032381	MOUSE9_69_PE8	HBG004254
ENSMUSG00000035765	MOUSE18_79_PE1	HBG009801
ENSMUSG00000024792	MOUSE19_7_PE11	HBG075665
ENSMUSG00000038141	MOUSE17_7_PE12	HBG000215
ENSMUSG00000024259	MOUSE18_33_PE6	HBG003300
ENSMUSG00000041355	MOUSE3_91_PE44	HBG013233
ENSMUSG00000026675	MOUSE1_176_PE2	HBG072096
ENSMUSG00000028863	MOUSE4_128_PE22	HBG041666
ENSMUSG00000000154	MOUSE7_148_PE2	HBG053461
ENSMUSG00000040040	MOUSE14_58_PE5	HBG002657
ENSMUSG00000029752	MOUSE6_8_PE6	HBG010450
ENSMUSG00000063145	MOUSE2_70_PE8	HBG003017
ENSMUSG00000007867	MOUSE12_90_PE10	HBG026259
ENSMUSG00000001228	MOUSE17_59_PE3	HBG018529
ENSMUSG00000061650	MOUSE11_62_PE16	HBG038458
ENSMUSG00000024941	MOUSE19_6_PE52	HBG003476
ENSMUSG00000024833	MOUSE19_6_PE60	HBG023166
ENSMUSG00000054414	MOUSE3_119_PE5	HBG069118
ENSMUSG00000037434	MOUSE1_197_PE26	HBG069118
ENSMUSG00000025759	MOUSE3_43_PE2	HBG033434
ENSMUSG00000059183	MOUSE9_68_PE19	HBG000911
ENSMUSG00000027259	MOUSE2_122_PE33	HBG068758
ENSMUSG00000021357	MOUSE13_33_PE1	HBG004144
ENSMUSG00000058173	MOUSE9_16_PE17	HBG087087
ENSMUSG00000037801	MOUSE9_66_PE6	HBG019596
ENSMUSG00000025737	MOUSE17_27_PE38	HBG049922
ENSMUSG00000035505	MOUSE5_94_PE3	HBG061139
ENSMUSG00000030264	MOUSE6_113_PE7	HBG037800
ENSMUSG00000029074	MOUSE4_159_PE44	HBG054182
ENSMUSG00000030733	MOUSE7_130_PE13	HBG058134
ENSMUSG00000039242	MOUSE13_15_PE3	HBG048466
ENSMUSG00000020843	MOUSE11_79_PE17	HBG076777
ENSMUSG00000029536	MOUSE5_119_PE24	HBG056267
ENSMUSG00000049717	MOUSE8_10_PE4	HBG066760
ENSMUSG00000014550	MOUSE6_91_PE15	HBG048930
ENSMUSG00000008140	MOUSE7_45_PE46	HBG048542
ENSMUSG00000027722	MOUSE3_39_PE18	HBG080179
ENSMUSG00000074876	MOUSE2_124_PE7	HBG080179
ENSMUSG00000026516	MOUSE1_187_PE11	HBG080179
ENSMUSG00000002763	MOUSE17_48_PE41	HBG080179
ENSMUSG00000039509	MOUSE8_129_PE21	HBG007603
ENSMUSG00000043541	MOUSE6_146_PE3	HBG045072
ENSMUSG00000025794	MOUSE9_125_PE4	HBG006092
ENSMUSG00000034854	MOUSE10_84_PE35	HBG045413
ENSMUSG00000006599	MOUSE7_48_PE12	HBG008466
ENSMUSG00000003923	MOUSE10_73_PE7	HBG010906
ENSMUSG00000027079	MOUSE2_85_PE21	HBG003694
ENSMUSG00000031668	MOUSE6_70_PE2	HBG000026
ENSMUSG00000024429	MOUSE17_38_PE22	HBG037378
ENSMUSG00000037287	MOUSE9_44_PE6	HBG000331
ENSMUSG00000038102	MOUSE8_50_PE1	HBG024098
ENSMUSG00000038622	MOUSE15_55_PE3	HBG011109
ENSMUSG00000048201	MOUSE2_148_PE1	HBG026140
ENSMUSG00000026609	MOUSE1_194_PE4	HBG038320
ENSMUSG00000032469	MOUSE9_103_PE7	HBG006450
ENSMUSG00000022391	MOUSE15_85_PE8	HBG024615
ENSMUSG00000041733	MOUSE5_119_PE21	HBG037987
ENSMUSG00000056394	MOUSE7_13_PE19	HBG009522
ENSMUSG00000027550	MOUSE3_15_PE5	HBG058403
ENSMUSG00000011114	MOUSE9_39_PE20	HBG075734
ENSMUSG00000061882	MOUSE5_128_PE8	HBG047023
ENSMUSG00000027649	MOUSE2_159_PE21	HBG005652
ENSMUSG00000035506	MOUSE16_35_PE6	HBG059292
ENSMUSG00000040842	MOUSE4_145_PE11	HBG023509
ENSMUSG00000074064	MOUSE8_125_PE1	HBG067990
ENSMUSG00000068922	MOUSE3_92_PE5	HBG003478
ENSMUSG00000001323	MOUSE11_78_PE10	HBG051966
ENSMUSG00000027363	MOUSE2_128_PE11	HBG023797
ENSMUSG00000037307	MOUSE2_145_PE7	HBG003287
ENSMUSG00000028455	MOUSE4_44_PE24	HBG000392
ENSMUSG00000024319	MOUSE17_36_PE17	HBG009808
ENSMUSG00000022040	MOUSE14_67_PE1	HBG051603
ENSMUSG00000058267	MOUSE1_165_PE8	HBG000085
ENSMUSG00000029027	MOUSE4_157_PE4	HBG077139
ENSMUSG00000036073	MOUSE4_43_PE19	HBG003637
ENSMUSG00000038425	MOUSE18_74_PE2	HBG024669
ENSMUSG00000001569	MOUSE5_31_PE5	HBG064828
ENSMUSG00000039263	MOUSE2_176_PE11	HBG003713
ENSMUSG00000038298	MOUSE3_100_PE4	HBG059598
ENSMUSG00000026450	MOUSE1_138_PE24	HBG063327
ENSMUSG00000015095	MOUSE2_26_PE48	HBG002625
ENSMUSG00000020495	MOUSE11_90_PE3	HBG021587
ENSMUSG00000021103	MOUSE12_76_PE9	HBG003404
ENSMUSG00000021906	MOUSE14_32_PE6	HBG021641
ENSMUSG00000022779	MOUSE16_18_PE2	HBG004691
ENSMUSG00000002814	MOUSE11_63_PE7	HBG004691
ENSMUSG00000020085	MOUSE10_64_PE4	HBG048703
ENSMUSG00000027498	MOUSE2_174_PE5	HBG000028
ENSMUSG00000006471	MOUSE2_26_PE21	HBG061958
ENSMUSG00000005514	MOUSE5_141_PE7	HBG061958
ENSMUSG00000034617	MOUSE13_72_PE1	HBG061958
ENSMUSG00000027193	MOUSE2_95_PE13	HBG009711
ENSMUSG00000024991	MOUSE19_63_PE2	HBG027533
ENSMUSG00000021432	MOUSE13_41_PE1	HBG000449
ENSMUSG00000005370	MOUSE17_92_PE2	HBG007493
ENSMUSG00000026003	MOUSE1_69_PE7	HBG027624
ENSMUSG00000018574	MOUSE11_73_PE28	HBG027624
ENSMUSG00000027710	MOUSE3_38_PE7	HBG027624
ENSMUSG00000027332	MOUSE2_120_PE15	HBG027624
ENSMUSG00000003809	MOUSE8_89_PE29	HBG027624
ENSMUSG00000029545	MOUSE5_119_PE13	HBG027624
ENSMUSG00000030861	MOUSE7_135_PE18	HBG027624
ENSMUSG00000031969	MOUSE9_28_PE7	HBG027624
ENSMUSG00000040525	MOUSE7_20_PE11	HBG036291
ENSMUSG00000029162	MOUSE5_33_PE8	HBG064163
ENSMUSG00000028085	MOUSE3_88_PE2	HBG026877
ENSMUSG00000027346	MOUSE2_134_PE6	HBG057827
ENSMUSG00000040220	MOUSE8_129_PE16	HBG087783
ENSMUSG00000052253	MOUSE15_27_PE4	HBG005299
ENSMUSG00000016757	MOUSE15_87_PE8	HBG001852
ENSMUSG00000060121	MOUSE12_62_PE2	HBG022025
ENSMUSG00000024253	MOUSE17_88_PE4	HBG003375
ENSMUSG00000048677	MOUSE7_149_PE17	HBG023204
ENSMUSG00000028532	MOUSE4_103_PE4	HBG023900
ENSMUSG00000026856	MOUSE2_31_PE32	HBG005629
ENSMUSG00000028430	MOUSE4_42_PE16	HBG025339
ENSMUSG00000018378	MOUSE11_91_PE5	HBG021580
ENSMUSG00000054397	MOUSE12_79_PE6	HBG072032
ENSMUSG00000034154	MOUSE2_121_PE1	HBG006888
ENSMUSG00000029402	MOUSE5_128_PE28	HBG002243
ENSMUSG00000066839	MOUSE9_23_PE20	HBG000788
ENSMUSG00000034126	MOUSE12_91_PE11	HBG045684
ENSMUSG00000039254	MOUSE2_33_PE12	HBG045684
ENSMUSG00000022247	MOUSE15_11_PE6	HBG027534
ENSMUSG00000019373	MOUSE11_62_PE13	HBG004550
ENSMUSG00000040236	MOUSE8_4_PE21	HBG004922
ENSMUSG00000028443	MOUSE4_43_PE4	HBG013009
ENSMUSG00000028907	MOUSE4_128_PE4	HBG003929
ENSMUSG00000020220	MOUSE4_149_PE2	HBG015642
ENSMUSG00000028423	MOUSE4_42_PE12	HBG046486
ENSMUSG00000020248	MOUSE10_85_PE18	HBG051219
ENSMUSG00000024131	MOUSE17_89_PE1	HBG000759
ENSMUSG00000029446	MOUSE5_135_PE3	HBG018190
ENSMUSG00000024800	MOUSE19_37_PE4	HBG026147
ENSMUSG00000026754	MOUSE2_40_PE10	HBG059182
ENSMUSG00000025474	MOUSE7_144_PE17	HBG005930
ENSMUSG00000025503	MOUSE7_146_PE1	HBG003768
ENSMUSG00000036819	MOUSE11_61_PE57	HBG009195
ENSMUSG00000027132	MOUSE2_113_PE29	HBG047752
ENSMUSG00000034263	MOUSE9_68_PE4	HBG059940
ENSMUSG00000029569	MOUSE6_15_PE1	HBG024164
ENSMUSG00000029730	MOUSE5_143_PE50	HBG037284
ENSMUSG00000002870	MOUSE6_88_PE10	HBG037284
ENSMUSG00000005410	MOUSE8_79_PE6	HBG037284
ENSMUSG00000027353	MOUSE2_134_PE13	HBG037284
ENSMUSG00000074771	MOUSE2_138_PE7	HBG025724
ENSMUSG00000028991	MOUSE4_152_PE2	HBG000918
ENSMUSG00000020982	MOUSE12_72_PE12	HBG002598
ENSMUSG00000045176	MOUSE11_72_PE13	HBG023456
ENSMUSG00000000804	MOUSE11_88_PE2	HBG026308
ENSMUSG00000032754	MOUSE5_124_PE8	HBG020931
ENSMUSG00000023939	MOUSE17_47_PE23	HBG082864
ENSMUSG00000006676	MOUSE9_112_PE61	HBG053180
ENSMUSG00000034709	MOUSE17_92_PE6	HBG019688
ENSMUSG00000038540	MOUSE7_86_PE4	HBG035458
ENSMUSG00000030725	MOUSE7_103_PE20	HBG003984
ENSMUSG00000006763	MOUSE7_48_PE3	HBG061227
ENSMUSG00000029594	MOUSE5_124_PE2	HBG000082
ENSMUSG00000020111	MOUSE10_62_PE1	HBG062927
ENSMUSG00000031153	MOUSEX_8_PE1	HBG023596
ENSMUSG00000061458	MOUSE12_18_PE9	HBG019799
ENSMUSG00000043207	MOUSE4_124_PE17	HBG003340
ENSMUSG00000038206	MOUSE8_60_PE6	HBG047135
ENSMUSG00000034949	MOUSE10_84_PE22	HBG058967
ENSMUSG00000005899	MOUSE16_18_PE39	HBG045660
ENSMUSG00000018761	MOUSE11_72_PE56	HBG003218
ENSMUSG00000066621	MOUSE5_150_PE4	HBG023708
ENSMUSG00000034863	MOUSE8_76_PE13	HBG025143
ENSMUSG00000066042	MOUSE4_136_PE9	HBG004565
ENSMUSG00000002661	MOUSE17_59_PE37	HBG048885
ENSMUSG00000022749	MOUSE16_60_PE4	HBG009342
ENSMUSG00000041958	MOUSE11_81_PE45	HBG002489
ENSMUSG00000020000	MOUSE10_25_PE20	HBG071859
ENSMUSG00000029885	MOUSE6_42_PE17	HBG071859
ENSMUSG00000036282	MOUSE14_49_PE6	HBG007802
ENSMUSG00000029553	MOUSE6_18_PE1	HBG025981
ENSMUSG00000023990	MOUSE17_50_PE2	HBG025981
ENSMUSG00000039637	MOUSE16_5_PE11	HBG078773
ENSMUSG00000030871	MOUSE7_126_PE1	HBG026341
ENSMUSG00000027582	MOUSE2_184_PE21	HBG069124
ENSMUSG00000034639	MOUSE6_108_PE1	HBG055101
ENSMUSG00000029735	MOUSE6_45_PE13	HBG078236
ENSMUSG00000028312	MOUSE4_54_PE1	HBG057592
ENSMUSG00000024974	MOUSE19_55_PE12	HBG057592
ENSMUSG00000027997	MOUSE3_134_PE1	HBG059271
ENSMUSG00000026623	MOUSE1_197_PE22	HBG075367
ENSMUSG00000029029	MOUSE4_157_PE13	HBG020739
ENSMUSG00000016541	MOUSE15_89_PE1	HBG024627
ENSMUSG00000036611	MOUSE9_27_PE5	HBG024180
ENSMUSG00000004270	MOUSE6_125_PE8	HBG001150
ENSMUSG00000026766	MOUSE2_50_PE4	HBG023315
ENSMUSG00000034390	MOUSE8_123_PE1	HBG021021
ENSMUSG00000001155	MOUSE10_79_PE27	HBG021786
ENSMUSG00000034442	MOUSE12_76_PE10	HBG003960
ENSMUSG00000022682	MOUSE16_14_PE12	HBG022584
ENSMUSG00000042447	MOUSE6_9_PE3	HBG002094
ENSMUSG00000018449	MOUSE11_74_PE5	HBG021336
ENSMUSG00000026142	MOUSE1_84_PE3	HBG037963
ENSMUSG00000011658	MOUSE7_46_PE18	HBG069123
ENSMUSG00000034926	MOUSE4_109_PE5	HBG004834
ENSMUSG00000034850	MOUSE2_128_PE26	HBG019733
ENSMUSG00000031171	MOUSEX_8_PE31	HBG007921
ENSMUSG00000063802	MOUSE7_5_PE13	HBG021269
ENSMUSG00000034216	MOUSE2_120_PE32	HBG018960
ENSMUSG00000024790	MOUSE19_7_PE14	HBG019352
ENSMUSG00000028139	MOUSE3_97_PE21	HBG054480
ENSMUSG00000029076	MOUSE4_159_PE38	HBG084787
ENSMUSG00000030101	MOUSE6_108_PE2	HBG068474
ENSMUSG00000036632	MOUSE3_57_PE5	HBG005111
ENSMUSG00000000600	MOUSE5_4_PE14	HBG057544
ENSMUSG00000055660	MOUSE17_99_PE1	HBG088426
ENSMUSG00000029911	MOUSE6_42_PE6	HBG002909
ENSMUSG00000025731	MOUSE17_27_PE47	HBG000717
ENSMUSG00000038827	MOUSE4_58_PE5	HBG005049
ENSMUSG00000020549	MOUSE11_67_PE3	HBG009789
ENSMUSG00000024228	MOUSE17_62_PE2	HBG022920
ENSMUSG00000029844	MOUSE6_52_PE9	HBG050076
ENSMUSG00000033029	MOUSE15_82_PE30	HBG002384
ENSMUSG00000041660	MOUSE2_111_PE6	HBG059039
ENSMUSG00000031532	MOUSE8_36_PE16	HBG043081
ENSMUSG00000029456	MOUSE5_125_PE30	HBG020903
ENSMUSG00000057234	MOUSE2_110_PE3	HBG020571
ENSMUSG00000023830	MOUSE17_14_PE8	HBG025588
ENSMUSG00000059518	MOUSE5_142_PE9	HBG009758
ENSMUSG00000051768	MOUSE7_25_PE30	HBG053274
ENSMUSG00000045160	MOUSE6_82_PE31	HBG003431
ENSMUSG00000032121	MOUSE9_39_PE4	HBG023121
ENSMUSG00000034729	MOUSE17_49_PE12	HBG022300
ENSMUSG00000060708	MOUSE5_39_PE7	HBG049789
ENSMUSG00000070394	MOUSE11_73_PE4	HBG083057
ENSMUSG00000029265	MOUSE5_112_PE6	HBG060903
ENSMUSG00000028394	MOUSE4_64_PE13	HBG060903
ENSMUSG00000046186	MOUSE9_82_PE7	HBG083436
ENSMUSG00000038417	MOUSE10_42_PE16	HBG003347
ENSMUSG00000036023	MOUSE14_51_PE20	HBG027749
ENSMUSG00000053070	MOUSE9_9_PE3	HBG015915
ENSMUSG00000073387	MOUSE17_49_PE22	HBG002799
ENSMUSG00000035139	MOUSE13_54_PE3	HBG047695
ENSMUSG00000005813	MOUSE3_142_PE16	HBG009433
ENSMUSG00000041921	MOUSE2_72_PE13	HBG009433
ENSMUSG00000032875	MOUSE7_104_PE20	HBG037847
ENSMUSG00000028393	MOUSE4_64_PE12	HBG004562
ENSMUSG00000039356	MOUSE2_32_PE18	HBG008505
ENSMUSG00000041396	MOUSE1_170_PE4	HBG047225
ENSMUSG00000024524	MOUSE18_70_PE2	HBG085795
ENSMUSG00000040009	MOUSE10_78_PE2	HBG085795
ENSMUSG00000062198	MOUSE12_58_PE1	HBG018436
ENSMUSG00000043572	MOUSE4_109_PE8	HBG031881
ENSMUSG00000021555	MOUSE13_62_PE3	HBG002203
ENSMUSG00000035845	MOUSE15_92_PE5	HBG010817
ENSMUSG00000028587	MOUSE4_111_PE18	HBG023940
ENSMUSG00000039342	MOUSE1_74_PE9	HBG023295
ENSMUSG00000074247	MOUSE8_76_PE12	HBG012330
ENSMUSG00000017007	MOUSE2_166_PE26	HBG001777
ENSMUSG00000038563	MOUSE7_85_PE7	HBG020351
ENSMUSG00000022780	MOUSE16_33_PE10	HBG058438
ENSMUSG00000038582	MOUSE5_126_PE14	HBG002114
ENSMUSG00000030450	MOUSE7_58_PE9	HBG062637
ENSMUSG00000056917	MOUSE19_6_PE42	HBG023182
ENSMUSG00000032818	MOUSE18_81_PE13	HBG038622
ENSMUSG00000024594	MOUSE18_60_PE2	HBG014880
ENSMUSG00000021595	MOUSE13_73_PE3	HBG014355
ENSMUSG00000059436	MOUSE12_80_PE11	HBG052899
ENSMUSG00000006289	MOUSE14_51_PE25	HBG037496
ENSMUSG00000028745	MOUSE4_143_PE10	HBG004510
ENSMUSG00000045679	MOUSE12_18_PE2	HBG068635
ENSMUSG00000047394	MOUSE15_93_PE10	HBG037835
ENSMUSG00000042642	MOUSE3_92_PE43	HBG057186
ENSMUSG00000059434	MOUSE5_33_PE41	HBG037563
ENSMUSG00000028798	MOUSE4_133_PE28	HBG006361
ENSMUSG00000020477	MOUSE11_6_PE17	HBG008032
ENSMUSG00000028523	MOUSE4_105_PE9	HBG047712
ENSMUSG00000010392	MOUSE11_79_PE27	HBG018216
ENSMUSG00000016495	MOUSE19_30_PE17	HBG003728
ENSMUSG00000033382	MOUSE18_22_PE8	HBG022478
ENSMUSG00000036980	MOUSE5_143_PE52	HBG002168
ENSMUSG00000041439	MOUSE1_55_PE7	HBG027481
ENSMUSG00000026439	MOUSE1_137_PE9	HBG005163
ENSMUSG00000027613	MOUSE2_157_PE23	HBG005502
ENSMUSG00000000374	MOUSE10_81_PE10	HBG021847
ENSMUSG00000036646	MOUSE2_26_PE29	HBG060427
ENSMUSG00000038312	MOUSE2_157_PE18	HBG060427
ENSMUSG00000030104	MOUSE6_108_PE7	HBG060427
ENSMUSG00000039804	MOUSE2_167_PE24	HBG020275
ENSMUSG00000036432	MOUSE3_61_PE2	HBG037898
ENSMUSG00000026697	MOUSE1_168_PE10	HBG037849
ENSMUSG00000047635	MOUSE5_128_PE21	HBG080762
ENSMUSG00000036598	MOUSE8_100_PE19	HBG038128
ENSMUSG00000050677	MOUSE5_38_PE17	HBG038128
ENSMUSG00000032114	MOUSE9_46_PE28	HBG020503
ENSMUSG00000029560	MOUSE5_146_PE6	HBG001653
ENSMUSG00000028402	MOUSE4_83_PE2	HBG044261
ENSMUSG00000019188	MOUSE2_154_PE30	HBG037916
ENSMUSG00000026348	MOUSE1_132_PE5	HBG039256
ENSMUSG00000017288	MOUSE11_79_PE6	HBG006366
ENSMUSG00000036333	MOUSE12_26_PE11	HBG045040
ENSMUSG00000027162	MOUSE2_111_PE2	HBG028282
ENSMUSG00000024816	MOUSE19_6_PE54	HBG019327
ENSMUSG00000045625	MOUSE16_33_PE11	HBG046155
ENSMUSG00000025812	MOUSE8_133_PE1	HBG088744
ENSMUSG00000026792	MOUSE2_34_PE14	HBG019823
ENSMUSG00000033703	MOUSE8_116_PE8	HBG025806
ENSMUSG00000024533	MOUSE18_70_PE11	HBG047870
ENSMUSG00000061028	MOUSE7_19_PE52	HBG046997
ENSMUSG00000026601	MOUSE1_161_PE14	HBG046242
ENSMUSG00000037375	MOUSE1_198_PE7	HBG045882
ENSMUSG00000047804	MOUSE11_64_PE12	HBG021395
ENSMUSG00000050296	MOUSE1_73_PE4	HBG063292
ENSMUSG00000029173	MOUSE5_55_PE3	HBG000303
ENSMUSG00000030680	MOUSE7_131_PE13	HBG022630
ENSMUSG00000032606	MOUSE9_112_PE48	HBG022197
ENSMUSG00000033308	MOUSE3_122_PE1	HBG023863
ENSMUSG00000026577	MOUSE1_170_PE12	HBG051926
ENSMUSG00000019814	MOUSE10_14_PE3	HBG001654
ENSMUSG00000037426	MOUSE5_35_PE8	HBG020976
ENSMUSG00000051220	MOUSEX_99_PE4	HBG058728
ENSMUSG00000030062	MOUSE6_87_PE20	HBG010003
ENSMUSG00000041203	MOUSE8_89_PE42	HBG070087
ENSMUSG00000061286	MOUSE7_26_PE36	HBG027888
ENSMUSG00000049721	MOUSE11_4_PE52	HBG023185
ENSMUSG00000019822	MOUSE10_43_PE8	HBG058915
ENSMUSG00000039943	MOUSE2_138_PE1	HBG092268
ENSMUSG00000050002	MOUSE13_60_PE5	HBG025922
ENSMUSG00000019470	MOUSE8_4_PE15	HBG009027
ENSMUSG00000032224	MOUSE9_73_PE6	HBG026024
ENSMUSG00000047434	MOUSE16_32_PE13	HBG038244
ENSMUSG00000046404	MOUSE1_135_PE6	HBG006534
ENSMUSG00000025102	MOUSE7_84_PE18	HBG039876
ENSMUSG00000030269	MOUSE6_113_PE9	HBG009834
ENSMUSG00000021993	MOUSE14_61_PE8	HBG005357
ENSMUSG00000026319	MOUSE1_110_PE4	HBG025647
ENSMUSG00000030697	MOUSE7_130_PE40	HBG039372
ENSMUSG00000003099	MOUSE7_17_PE14	HBG039372
ENSMUSG00000022827	MOUSE16_39_PE17	HBG006242
ENSMUSG00000020014	MOUSE10_96_PE2	HBG024466
ENSMUSG00000027487	MOUSE2_156_PE11	HBG056523
ENSMUSG00000053838	MOUSE11_7_PE1	HBG059823
ENSMUSG00000058586	MOUSE15_86_PE18	HBG047631
ENSMUSG00000025738	MOUSE17_27_PE37	HBG015264
ENSMUSG00000025512	MOUSE7_146_PE16	HBG001224
ENSMUSG00000021193	MOUSE13_7_PE1	HBG002331
ENSMUSG00000041936	MOUSE4_159_PE50	HBG085839
ENSMUSG00000041079	MOUSE16_90_PE3	HBG001645
ENSMUSG00000032417	MOUSE9_90_PE8	HBG001645
ENSMUSG00000046994	MOUSE1_57_PE17	HBG000005
ENSMUSG00000026209	MOUSE1_77_PE30	HBG023400
ENSMUSG00000062202	MOUSE17_32_PE3	HBG022291
ENSMUSG00000026585	MOUSE1_169_PE7	HBG018739
ENSMUSG00000042369	MOUSE2_77_PE7	HBG005175
ENSMUSG00000030960	MOUSE7_137_PE4	HBG004735
ENSMUSG00000062526	MOUSE18_70_PE4	HBG009573
ENSMUSG00000032112	MOUSE9_46_PE29	HBG002269
ENSMUSG00000074030	MOUSE8_130_PE18	HBG007945
ENSMUSG00000052752	MOUSE17_26_PE26	HBG022779
ENSMUSG00000020459	MOUSE11_31_PE6	HBG019336
ENSMUSG00000003299	MOUSE9_22_PE7	HBG024921
ENSMUSG00000038084	MOUSE16_31_PE5	HBG005603
ENSMUSG00000001039	MOUSE11_63_PE43	HBG002898
ENSMUSG00000037343	MOUSE15_58_PE1	HBG030828
ENSMUSG00000036820	MOUSE17_26_PE1	HBG067751
ENSMUSG00000027006	MOUSE2_81_PE6	HBG025656
ENSMUSG00000040473	MOUSE5_6_PE7	HBG037451
ENSMUSG00000039783	MOUSE1_181_PE8	HBG033689
ENSMUSG00000028247	MOUSE4_23_PE10	HBG025541
ENSMUSG00000028011	MOUSE3_84_PE4	HBG005430
ENSMUSG00000057880	MOUSE16_9_PE3	HBG006525
ENSMUSG00000039740	MOUSE4_49_PE1	HBG007365
ENSMUSG00000019689	MOUSE6_40_PE15	HBG027675
ENSMUSG00000037259	MOUSE2_146_PE4	HBG053830
ENSMUSG00000024588	MOUSE18_67_PE8	HBG001017
ENSMUSG00000022450	MOUSE15_85_PE47	HBG002911
ENSMUSG00000035757	MOUSE15_92_PE15	HBG024638
ENSMUSG00000027245	MOUSE2_123_PE14	HBG032953
ENSMUSG00000031684	MOUSE8_83_PE6	HBG037509
ENSMUSG00000004788	MOUSE12_89_PE18	HBG001300
ENSMUSG00000039148	MOUSE19_6_PE19	HBG023145
ENSMUSG00000021902	MOUSE14_31_PE29	HBG040773
ENSMUSG00000047344	MOUSEX_9_PE9	HBG023524
ENSMUSG00000061666	MOUSE11_90_PE2	HBG057714
ENSMUSG00000039153	MOUSE17_46_PE9	HBG087365
ENSMUSG00000028833	MOUSE4_130_PE14	HBG059447
ENSMUSG00000049288	MOUSE3_99_PE44	HBG004160
ENSMUSG00000058006	MOUSE4_34_PE5	HBG025546
ENSMUSG00000003778	MOUSE18_36_PE18	HBG056996
ENSMUSG00000027628	MOUSE2_158_PE25	HBG020218
ENSMUSG00000029310	MOUSE5_107_PE13	HBG038194
ENSMUSG00000075321	MOUSE10_11_PE2	HBG026453
ENSMUSG00000030752	MOUSE7_129_PE4	HBG058571
ENSMUSG00000040936	MOUSE9_125_PE8	HBG048442
ENSMUSG00000038446	MOUSE10_42_PE13	HBG044857
ENSMUSG00000049553	MOUSE6_71_PE6	HBG015165
ENSMUSG00000047260	MOUSE11_76_PE15	HBG001010
ENSMUSG00000006095	MOUSE7_31_PE15	HBG004488
ENSMUSG00000025289	MOUSEX_151_PE15	HBG000126
ENSMUSG00000024997	MOUSE19_63_PE6	HBG000126
ENSMUSG00000034108	MOUSE19_5_PE48	HBG003794
ENSMUSG00000031885	MOUSE8_110_PE7	HBG021094
ENSMUSG00000005883	MOUSE2_175_PE6	HBG041471
ENSMUSG00000022677	MOUSE16_15_PE7	HBG038558
ENSMUSG00000030674	MOUSE7_131_PE19	HBG022626
ENSMUSG00000002635	MOUSE7_35_PE8	HBG053217
ENSMUSG00000018415	MOUSE11_62_PE38	HBG010922
ENSMUSG00000051990	MOUSE5_76_PE9	HBG026388
ENSMUSG00000063576	MOUSE17_48_PE37	HBG022296
ENSMUSG00000024078	MOUSE17_78_PE4	HBG022531
ENSMUSG00000020319	MOUSE11_23_PE1	HBG060844
ENSMUSG00000021947	MOUSE14_58_PE1	HBG002832
ENSMUSG00000038005	MOUSE8_65_PE5	HBG023710
ENSMUSG00000022536	MOUSE16_5_PE33	HBG001927
ENSMUSG00000033106	MOUSE8_111_PE11	HBG021045
ENSMUSG00000025078	MOUSE19_58_PE9	HBG009115
ENSMUSG00000027998	MOUSE3_86_PE4	HBG005961
ENSMUSG00000038060	MOUSE9_123_PE10	HBG048914
ENSMUSG00000020346	MOUSE11_51_PE27	HBG025003
ENSMUSG00000029136	MOUSE5_34_PE3	HBG004886
ENSMUSG00000055538	MOUSE14_25_PE7	HBG038400
ENSMUSG00000068732	MOUSE3_112_PE5	HBG000949
ENSMUSG00000028979	MOUSE4_152_PE8	HBG024554
ENSMUSG00000029629	MOUSE6_13_PE2	HBG037458
ENSMUSG00000010110	MOUSE19_9_PE15	HBG033546
ENSMUSG00000028016	MOUSE3_137_PE4	HBG060753
ENSMUSG00000021996	MOUSE14_75_PE4	HBG001984
ENSMUSG00000038879	MOUSE15_36_PE10	HBG023475
ENSMUSG00000005846	MOUSE16_12_PE6	HBG047629
ENSMUSG00000025240	MOUSE9_128_PE3	HBG022235
ENSMUSG00000027889	MOUSE3_111_PE20	HBG010522
ENSMUSG00000053870	MOUSE3_159_PE4	HBG023303
ENSMUSG00000073016	MOUSEX_101_PE7	HBG032011
ENSMUSG00000031865	MOUSE6_82_PE25	HBG001527
ENSMUSG00000037958	MOUSE11_80_PE6	HBG057927
ENSMUSG00000066900	MOUSE5_121_PE1	HBG038765
ENSMUSG00000022614	MOUSE15_93_PE6	HBG024631
ENSMUSG00000047115	MOUSE6_50_PE3	HBG024196
ENSMUSG00000035179	MOUSE19_11_PE19	HBG046226
ENSMUSG00000032252	MOUSE9_65_PE2	HBG039936
ENSMUSG00000025745	MOUSE5_32_PE7	HBG058730
ENSMUSG00000022853	MOUSE16_23_PE1	HBG058730
ENSMUSG00000054474	MOUSE6_70_PE7	HBG019722
ENSMUSG00000000738	MOUSE8_128_PE34	HBG039595
ENSMUSG00000028232	MOUSE4_4_PE1	HBG041929
ENSMUSG00000038542	MOUSE8_14_PE12	HBG004457
ENSMUSG00000035933	MOUSE12_33_PE13	HBG024147
ENSMUSG00000020903	MOUSE11_71_PE5	HBG026273
ENSMUSG00000022388	MOUSE15_92_PE8	HBG095827
ENSMUSG00000001082	MOUSE5_37_PE3	HBG012488
ENSMUSG00000027981	MOUSE3_117_PE4	HBG025623
ENSMUSG00000021065	MOUSE12_81_PE1	HBG052038
ENSMUSG00000040325	MOUSE9_111_PE11	HBG039777
ENSMUSG00000027199	MOUSE2_124_PE6	HBG019511
ENSMUSG00000027305	MOUSE2_121_PE9	HBG019449
ENSMUSG00000050132	MOUSE11_81_PE52	HBG006069
ENSMUSG00000026790	MOUSE2_31_PE4	HBG038719
ENSMUSG00000060376	MOUSE7_26_PE35	HBG003090
ENSMUSG00000024472	MOUSE18_46_PE14	HBG049749
ENSMUSG00000039887	MOUSE3_124_PE5	HBG026118
ENSMUSG00000041319	MOUSE17_25_PE10	HBG001871
ENSMUSG00000053334	MOUSE5_117_PE16	HBG000996
ENSMUSG00000051557	MOUSE4_159_PE32	HBG020753
ENSMUSG00000033285	MOUSE3_103_PE3	HBG000292
ENSMUSG00000026914	MOUSE2_62_PE2	HBG000535
ENSMUSG00000031958	MOUSE8_117_PE3	HBG033462
ENSMUSG00000036875	MOUSE10_65_PE9	HBG003852
ENSMUSG00000036298	MOUSE15_95_PE1	HBG072011
ENSMUSG00000037622	MOUSE4_137_PE7	HBG001714
ENSMUSG00000034919	MOUSE4_109_PE7	HBG023923
ENSMUSG00000032743	MOUSE7_129_PE10	HBG081065
ENSMUSG00000040661	MOUSE9_111_PE10	HBG022188
ENSMUSG00000019731	MOUSE8_77_PE8	HBG025183
ENSMUSG00000042202	MOUSE4_159_PE9	HBG025183
ENSMUSG00000028651	MOUSE4_126_PE13	HBG011319
ENSMUSG00000020056	MOUSE10_91_PE11	HBG029222
ENSMUSG00000030868	MOUSE7_126_PE6	HBG082759
ENSMUSG00000023262	MOUSE9_110_PE20	HBG010588
ENSMUSG00000002372	MOUSE17_59_PE21	HBG048845
ENSMUSG00000015804	MOUSE5_48_PE4	HBG022159
ENSMUSG00000025159	MOUSE19_43_PE13	HBG022812
ENSMUSG00000035878	MOUSE9_57_PE10	HBG022001
ENSMUSG00000030769	MOUSE7_127_PE2	HBG092732
ENSMUSG00000027371	MOUSE2_129_PE9	HBG001372
ENSMUSG00000045316	MOUSE17_26_PE55	HBG001372
ENSMUSG00000022555	MOUSE15_79_PE66	HBG012092
ENSMUSG00000015659	MOUSE17_7_PE3	HBG023690
ENSMUSG00000020801	MOUSE11_75_PE7	HBG013514
ENSMUSG00000033701	MOUSE1_160_PE10	HBG003046
ENSMUSG00000040997	MOUSE14_55_PE3	HBG031751
ENSMUSG00000031835	MOUSE8_125_PE6	HBG005348
ENSMUSG00000048701	MOUSE10_72_PE8	HBG023013
ENSMUSG00000020904	MOUSE11_71_PE3	HBG003503
ENSMUSG00000027329	MOUSE2_132_PE34	HBG074779
ENSMUSG00000030880	MOUSE7_124_PE22	HBG022595
ENSMUSG00000071037	MOUSE17_89_PE4	HBG003162
ENSMUSG00000031729	MOUSE8_114_PE13	HBG033656
ENSMUSG00000038291	MOUSE8_48_PE12	HBG002847
ENSMUSG00000070972	MOUSE4_61_PE7	HBG010632
ENSMUSG00000025264	MOUSEX_147_PE6	HBG030485
ENSMUSG00000031816	MOUSE8_126_PE11	HBG021030
ENSMUSG00000028207	MOUSE4_10_PE2	HBG045755
ENSMUSG00000025949	MOUSE1_67_PE21	HBG044906
ENSMUSG00000032939	MOUSE8_99_PE10	HBG007594
ENSMUSG00000041881	MOUSE17_36_PE5	HBG064712
ENSMUSG00000029919	MOUSE6_65_PE4	HBG074621
ENSMUSG00000051578	MOUSE8_109_PE13	HBG057224
ENSMUSG00000041028	MOUSE14_37_PE7	HBG009862
ENSMUSG00000024869	MOUSE19_5_PE2	HBG029100
ENSMUSG00000023988	MOUSE17_49_PE21	HBG051669
ENSMUSG00000026679	MOUSE2_22_PE4	HBG088286
ENSMUSG00000031173	MOUSEX_10_PE10	HBG026072
ENSMUSG00000022751	MOUSE16_60_PE3	HBG068573
ENSMUSG00000013997	MOUSE1_177_PE31	HBG068573
ENSMUSG00000036285	MOUSE5_81_PE17	HBG067873
ENSMUSG00000022244	MOUSE15_12_PE2	HBG058247
ENSMUSG00000055137	MOUSE13_18_PE1	HBG058247
ENSMUSG00000018697	MOUSE11_87_PE10	HBG006675
ENSMUSG00000023963	MOUSE17_45_PE10	HBG086104
ENSMUSG00000021598	MOUSE13_73_PE5	HBG006214
ENSMUSG00000025231	MOUSE19_48_PE4	HBG005301
ENSMUSG00000025950	MOUSE1_67_PE19	HBG001081
ENSMUSG00000030541	MOUSE7_83_PE2	HBG001081
ENSMUSG00000058076	MOUSE1_177_PE14	HBG003412
ENSMUSG00000037526	MOUSE14_48_PE3	HBG002252
ENSMUSG00000007987	MOUSE5_142_PE6	HBG030545
ENSMUSG00000001783	MOUSE10_89_PE5	HBG005288
ENSMUSG00000045694	MOUSEX_151_PE11	HBG067559
ENSMUSG00000026199	MOUSE1_77_PE20	HBG059229
ENSMUSG00000028383	MOUSE4_61_PE13	HBG003186
ENSMUSG00000032409	MOUSE9_99_PE9	HBG021816
ENSMUSG00000046034	MOUSE15_29_PE4	HBG042283
ENSMUSG00000020063	MOUSE10_65_PE25	HBG023026
ENSMUSG00000018196	MOUSE1_148_PE5	HBG066861
ENSMUSG00000073077	MOUSEX_77_PE2	HBG019371
ENSMUSG00000026771	MOUSE2_24_PE10	HBG029494
ENSMUSG00000021978	MOUSE14_65_PE14	HBG005644
ENSMUSG00000027198	MOUSE2_95_PE1	HBG005644
ENSMUSG00000030619	MOUSE7_93_PE7	HBG017831
ENSMUSG00000026664	MOUSE2_5_PE8	HBG030539
ENSMUSG00000042747	MOUSE3_92_PE26	HBG002589
ENSMUSG00000001707	MOUSE13_40_PE15	HBG045805
ENSMUSG00000038422	MOUSE4_64_PE11	HBG025385
ENSMUSG00000042705	MOUSE18_49_PE15	HBG068457
ENSMUSG00000074890	MOUSE2_122_PE31	HBG059255
ENSMUSG00000056870	MOUSE1_47_PE1	HBG006519
ENSMUSG00000031960	MOUSE8_116_PE15	HBG011040
ENSMUSG00000023938	MOUSE17_47_PE10	HBG011040
ENSMUSG00000036513	MOUSE3_60_PE1	HBG002407
ENSMUSG00000020153	MOUSE10_83_PE29	HBG002875
ENSMUSG00000024807	MOUSE19_7_PE4	HBG088928
ENSMUSG00000027957	MOUSE3_120_PE8	HBG051612
ENSMUSG00000031156	MOUSEX_8_PE7	HBG051612
ENSMUSG00000028293	MOUSE4_36_PE6	HBG051612
ENSMUSG00000033272	MOUSE18_38_PE17	HBG051612
ENSMUSG00000065979	MOUSE16_12_PE10	HBG022576
ENSMUSG00000030844	MOUSE7_132_PE33	HBG050841
ENSMUSG00000048578	MOUSE5_119_PE15	HBG000733
ENSMUSG00000028179	MOUSE3_162_PE3	HBG000094
ENSMUSG00000024142	MOUSE17_26_PE22	HBG001173
ENSMUSG00000035754	MOUSE10_83_PE6	HBG041844
ENSMUSG00000029613	MOUSE5_149_PE23	HBG018944
ENSMUSG00000020258	MOUSE9_110_PE7	HBG026246
ENSMUSG00000010453	MOUSE1_38_PE8	HBG008064
ENSMUSG00000040990	MOUSEX_156_PE1	HBG068481
ENSMUSG00000039018	MOUSE7_144_PE28	HBG005585
ENSMUSG00000042148	MOUSE11_66_PE3	HBG045802
ENSMUSG00000028954	MOUSE5_25_PE31	HBG004314
ENSMUSG00000009070	MOUSE10_78_PE1	HBG037996
ENSMUSG00000028024	MOUSE3_133_PE4	HBG005692
ENSMUSG00000018848	MOUSE11_37_PE5	HBG057912
ENSMUSG00000019791	MOUSE10_31_PE5	HBG015815
ENSMUSG00000070306	MOUSE9_46_PE13	HBG077947
ENSMUSG00000025613	MOUSE16_90_PE5	HBG076375
ENSMUSG00000038383	MOUSE2_157_PE7	HBG044810
ENSMUSG00000022401	MOUSE15_85_PE2	HBG005470
ENSMUSG00000024565	MOUSE18_85_PE4	HBG077154
ENSMUSG00000022821	MOUSE16_39_PE18	HBG009700
ENSMUSG00000051950	MOUSE5_155_PE18	HBG034976
ENSMUSG00000071662	MOUSE19_9_PE20	HBG005306
ENSMUSG00000027984	MOUSE3_135_PE4	HBG004934
ENSMUSG00000020309	MOUSE11_32_PE9	HBG008286
ENSMUSG00000027313	MOUSE2_120_PE35	HBG008286
ENSMUSG00000027502	MOUSE2_174_PE8	HBG005198
ENSMUSG00000071074	MOUSE17_48_PE12	HBG022324
ENSMUSG00000070699	MOUSE7_29_PE36	HBG030930
ENSMUSG00000039016	MOUSE9_53_PE8	HBG002951
ENSMUSG00000020219	MOUSE10_84_PE2	HBG002951
ENSMUSG00000032834	MOUSE10_81_PE9	HBG040856
ENSMUSG00000021559	MOUSE13_63_PE1	HBG024678
ENSMUSG00000038193	MOUSE8_61_PE1	HBG025112
ENSMUSG00000027430	MOUSE2_146_PE10	HBG007882
ENSMUSG00000032420	MOUSE9_92_PE1	HBG004184
ENSMUSG00000038122	MOUSE10_58_PE2	HBG037774
ENSMUSG00000042632	MOUSE15_82_PE40	HBG005063
ENSMUSG00000056220	MOUSE1_154_PE2	HBG038606
ENSMUSG00000035596	MOUSE7_4_PE10	HBG026466
ENSMUSG00000067567	MOUSEX_99_PE8	HBG078343
ENSMUSG00000018428	MOUSE11_91_PE11	HBG057086
ENSMUSG00000033294	MOUSE5_114_PE24	HBG020871
ENSMUSG00000024101	MOUSE17_69_PE15	HBG060984
ENSMUSG00000038704	MOUSE7_45_PE44	HBG021243
ENSMUSG00000022761	MOUSE16_18_PE28	HBG001495
ENSMUSG00000028821	MOUSE4_138_PE24	HBG001332
ENSMUSG00000057541	MOUSE5_25_PE1	HBG033353
ENSMUSG00000030990	MOUSE7_105_PE40	HBG045308
ENSMUSG00000034274	MOUSE11_5_PE29	HBG006789
ENSMUSG00000026482	MOUSE1_157_PE4	HBG081754
ENSMUSG00000031984	MOUSE8_130_PE16	HBG045769
ENSMUSG00000022554	MOUSE15_79_PE55	HBG020375
ENSMUSG00000028999	MOUSE5_25_PE2	HBG002475
ENSMUSG00000055184	MOUSE1_136_PE14	HBG060062
ENSMUSG00000036941	MOUSE18_77_PE3	HBG022504
[truncated: 706 more rows]

## Sheet: FSGD_dup_orth
Ensembl_gene_id	Homolens_gene_id	Homolens_family_id
ENSMUSG00000033149	MOUSE16_48_PE16	HBG047975
ENSMUSG00000048537	MOUSE9_46_PE45	HBG047975
ENSMUSG00000044629	MOUSE11_18_PE4	HBG018775
ENSMUSG00000029822	MOUSE6_51_PE2	HBG068272
ENSMUSG00000020435	MOUSE11_4_PE42	HBG068272
ENSMUSG00000039050	MOUSE2_183_PE1	HBG068272
ENSMUSG00000037202	MOUSE10_63_PE12	HBG025207
ENSMUSG00000052560	MOUSE15_94_PE3	HBG053556
ENSMUSG00000032564	MOUSE9_109_PE3	HBG053556
ENSMUSG00000021752	MOUSE14_7_PE11	HBG022167
ENSMUSG00000032412	MOUSE9_100_PE2	HBG049249
ENSMUSG00000026576	MOUSE1_170_PE16	HBG049249
ENSMUSG00000033526	MOUSE2_123_PE1	HBG032722
ENSMUSG00000026494	MOUSE1_185_PE1	HBG026236
ENSMUSG00000000489	MOUSE15_83_PE28	HBG060138
ENSMUSG00000018931	MOUSE11_63_PE14	HBG021414
ENSMUSG00000050700	MOUSE2_162_PE8	HBG020254
ENSMUSG00000074364	MOUSE7_16_PE7	HBG040359
ENSMUSG00000052151	MOUSE10_82_PE13	HBG028971
ENSMUSG00000040563	MOUSE9_23_PE10	HBG028971
ENSMUSG00000044667	MOUSE3_120_PE15	HBG028971
ENSMUSG00000021518	MOUSE13_70_PE8	HBG023219
ENSMUSG00000026407	MOUSE1_140_PE26	HBG023678
ENSMUSG00000034656	MOUSE8_89_PE11	HBG023678
ENSMUSG00000033419	MOUSE9_90_PE13	HBG026002
ENSMUSG00000047343	MOUSE1_46_PE6	HBG037299
ENSMUSG00000027071	MOUSE2_86_PE12	HBG072725
ENSMUSG00000022758	MOUSE16_18_PE34	HBG072725
ENSMUSG00000058230	MOUSE7_16_PE28	HBG003599
ENSMUSG00000038212	MOUSE13_68_PE3	HBG064601
ENSMUSG00000026932	MOUSE2_27_PE4	HBG024918
ENSMUSG00000035342	MOUSE19_46_PE14	HBG022825
ENSMUSG00000029862	MOUSE6_44_PE8	HBG001394
ENSMUSG00000061048	MOUSE8_111_PE20	HBG069674
ENSMUSG00000000303	MOUSE8_111_PE22	HBG069674
ENSMUSG00000049515	MOUSE1_95_PE20	HBG059191
ENSMUSG00000017686	MOUSE11_83_PE14	HBG032447
ENSMUSG00000041734	MOUSE3_90_PE9	HBG024028
ENSMUSG00000054978	MOUSE9_68_PE16	HBG019374
ENSMUSG00000030987	MOUSE7_106_PE1	HBG024722
ENSMUSG00000039156	MOUSE5_56_PE6	HBG024722
ENSMUSG00000037016	MOUSE3_55_PE4	HBG061539
ENSMUSG00000021782	MOUSE14_24_PE1	HBG061902
ENSMUSG00000064302	MOUSE1_123_PE4	HBG000861
ENSMUSG00000035582	MOUSE7_101_PE14	HBG044903
ENSMUSG00000036158	MOUSE15_97_PE6	HBG088435
ENSMUSG00000028226	MOUSE4_19_PE1	HBG059604
ENSMUSG00000000957	MOUSE14_55_PE8	HBG059604
ENSMUSG00000034902	MOUSE10_84_PE30	HBG058382
ENSMUSG00000024867	MOUSE19_25_PE5	HBG058382
ENSMUSG00000028126	MOUSE3_98_PE11	HBG058382
ENSMUSG00000067279	MOUSE19_37_PE11	HBG071969
ENSMUSG00000034898	MOUSE9_83_PE6	HBG089427
ENSMUSG00000023909	MOUSE17_25_PE18	HBG047591
ENSMUSG00000021898	MOUSE14_26_PE28	HBG022465
ENSMUSG00000036188	MOUSE12_38_PE3	HBG000156
ENSMUSG00000022098	MOUSE14_71_PE9	HBG025318
ENSMUSG00000013646	MOUSE11_60_PE20	HBG083095
ENSMUSG00000005583	MOUSE13_87_PE1	HBG071915
ENSMUSG00000008892	MOUSE8_24_PE17	HBG067721
ENSMUSG00000075053	MOUSE13_19_PE6	HBG067721
ENSMUSG00000075049	MOUSE13_19_PE10	HBG067721
ENSMUSG00000027712	MOUSE3_38_PE9	HBG057015
ENSMUSG00000024659	MOUSE19_21_PE1	HBG057015
ENSMUSG00000032231	MOUSE9_72_PE6	HBG057015
ENSMUSG00000018398	MOUSE11_55_PE16	HBG068544
ENSMUSG00000003526	MOUSE16_19_PE16	HBG007774
ENSMUSG00000060890	MOUSEX_97_PE8	HBG011185
ENSMUSG00000056055	MOUSE1_92_PE5	HBG011185
ENSMUSG00000017344	MOUSE11_81_PE53	HBG021325
ENSMUSG00000038463	MOUSE1_176_PE12	HBG061116
ENSMUSG00000056665	MOUSE15_78_PE8	HBG007596
ENSMUSG00000072568	MOUSE15_63_PE6	HBG087657
ENSMUSG00000038894	MOUSE8_12_PE1	HBG044200
ENSMUSG00000055024	MOUSE15_85_PE5	HBG045440
ENSMUSG00000020646	MOUSE12_26_PE9	HBG030094
ENSMUSG00000034930	MOUSE6_82_PE19	HBG023018
ENSMUSG00000072846	MOUSE6_113_PE16	HBG003508
ENSMUSG00000060451	MOUSE14_24_PE5	HBG059752
ENSMUSG00000010825	MOUSE5_149_PE13	HBG022689
ENSMUSG00000027315	MOUSE2_120_PE30	HBG061208
ENSMUSG00000029513	MOUSE5_120_PE2	HBG020897
ENSMUSG00000059013	MOUSE2_34_PE4	HBG024958
ENSMUSG00000024392	MOUSE17_37_PE50	HBG022361
ENSMUSG00000060012	MOUSE14_65_PE4	HBG003574
ENSMUSG00000028788	MOUSE4_133_PE39	HBG024378
ENSMUSG00000049139	MOUSE4_5_PE4	HBG024378
ENSMUSG00000024381	MOUSE18_34_PE11	HBG064013
ENSMUSG00000026272	MOUSE1_97_PE24	HBG005383
ENSMUSG00000026452	MOUSE1_139_PE19	HBG067820
ENSMUSG00000016200	MOUSE1_199_PE1	HBG067820
ENSMUSG00000029608	MOUSE5_125_PE8	HBG067820
ENSMUSG00000052837	MOUSE8_89_PE36	HBG076901
ENSMUSG00000000120	MOUSE11_98_PE23	HBG057155
ENSMUSG00000046997	MOUSE9_100_PE10	HBG015433
ENSMUSG00000004231	MOUSE19_46_PE5	HBG060095
ENSMUSG00000026687	MOUSE1_173_PE6	HBG075000
ENSMUSG00000049401	MOUSE2_183_PE16	HBG084895
ENSMUSG00000020089	MOUSE10_63_PE21	HBG014274
ENSMUSG00000025060	MOUSE19_49_PE5	HBG048858
ENSMUSG00000026872	MOUSE2_45_PE3	HBG061966
ENSMUSG00000024238	MOUSE18_6_PE6	HBG061966
ENSMUSG00000050666	MOUSE14_33_PE1	HBG023072
ENSMUSG00000003178	MOUSE6_121_PE9	HBG037399
ENSMUSG00000038244	MOUSE7_116_PE2	HBG037399
ENSMUSG00000025810	MOUSE8_134_PE1	HBG020092
ENSMUSG00000025969	MOUSE1_65_PE3	HBG020092
ENSMUSG00000053617	MOUSE19_49_PE1	HBG049088
ENSMUSG00000014813	MOUSE14_69_PE7	HBG082612
ENSMUSG00000033326	MOUSE4_121_PE17	HBG050536
ENSMUSG00000059974	MOUSE9_31_PE1	HBG038234
ENSMUSG00000062257	MOUSE9_30_PE1	HBG038234
ENSMUSG00000054676	MOUSE7_39_PE3	HBG057465
ENSMUSG00000030084	MOUSE6_88_PE17	HBG055834
ENSMUSG00000053646	MOUSE9_113_PE36	HBG055834
ENSMUSG00000027750	MOUSE3_56_PE6	HBG025065
ENSMUSG00000020176	MOUSE11_13_PE1	HBG021442
ENSMUSG00000011382	MOUSE7_46_PE71	HBG004969
ENSMUSG00000037458	MOUSE15_40_PE8	HBG044912
ENSMUSG00000049044	MOUSE2_73_PE1	HBG004332
ENSMUSG00000000915	MOUSE5_128_PE9	HBG020888
ENSMUSG00000001300	MOUSE8_9_PE2	HBG020036
ENSMUSG00000024891	MOUSE19_6_PE1	HBG061752
ENSMUSG00000010122	MOUSE11_63_PE28	HBG057948
ENSMUSG00000025157	MOUSE19_43_PE12	HBG056643
ENSMUSG00000021803	MOUSE14_37_PE6	HBG025844
ENSMUSG00000008206	MOUSE8_5_PE19	HBG088367
ENSMUSG00000051495	MOUSE8_132_PE4	HBG069907
ENSMUSG00000032740	MOUSE11_31_PE1	HBG083253
ENSMUSG00000050931	MOUSE3_135_PE6	HBG030014
ENSMUSG00000007122	MOUSE1_178_PE17	HBG023821
ENSMUSG00000004568	MOUSE8_4_PE6	HBG058986
ENSMUSG00000057134	MOUSE10_69_PE7	HBG003649
ENSMUSG00000027859	MOUSE3_105_PE11	HBG058525
ENSMUSG00000035067	MOUSE14_64_PE14	HBG058144
ENSMUSG00000019210	MOUSE6_121_PE4	HBG017664
ENSMUSG00000053375	MOUSE17_90_PE10	HBG017664
ENSMUSG00000037610	MOUSE3_34_PE1	HBG041167
ENSMUSG00000020155	MOUSE11_35_PE8	HBG041167
ENSMUSG00000029776	MOUSE6_53_PE3	HBG005932
ENSMUSG00000048847	MOUSE4_71_PE3	HBG005932
ENSMUSG00000020609	MOUSE12_9_PE2	HBG026194
ENSMUSG00000040276	MOUSE17_29_PE15	HBG059468
ENSMUSG00000027573	MOUSE2_183_PE22	HBG000080
ENSMUSG00000038028	MOUSE6_127_PE12	HBG059593
ENSMUSG00000027695	MOUSE3_29_PE3	HBG004713
ENSMUSG00000026469	MOUSE1_160_PE5	HBG005940
ENSMUSG00000069072	MOUSE3_33_PE6	HBG020076
ENSMUSG00000073805	MOUSE7_139_PE3	HBG022897
ENSMUSG00000001891	MOUSE11_22_PE6	HBG016080
ENSMUSG00000054640	MOUSE17_85_PE2	HBG055377
ENSMUSG00000062098	MOUSE2_140_PE2	HBG004637
ENSMUSG00000043303	MOUSE13_67_PE13	HBG004637
ENSMUSG00000006154	MOUSE7_5_PE2	HBG089300
ENSMUSG00000030098	MOUSE6_91_PE8	HBG069733
ENSMUSG00000005533	MOUSE7_70_PE10	HBG038350
ENSMUSG00000032338	MOUSE9_61_PE9	HBG090903
ENSMUSG00000067220	MOUSE5_75_PE12	HBG090903
ENSMUSG00000075415	MOUSE2_32_PE11	HBG026409
ENSMUSG00000036825	MOUSE3_150_PE12	HBG023882
ENSMUSG00000036206	MOUSE1_93_PE3	HBG024012
ENSMUSG00000029474	MOUSE5_127_PE8	HBG020896
ENSMUSG00000060568	MOUSE1_173_PE1	HBG023952
ENSMUSG00000033420	MOUSE6_86_PE13	HBG023065
ENSMUSG00000029338	MOUSE5_101_PE3	HBG023065
ENSMUSG00000028826	MOUSE4_138_PE19	HBG009116
ENSMUSG00000033502	MOUSE3_119_PE9	HBG057987
ENSMUSG00000032318	MOUSE9_58_PE4	HBG078251
ENSMUSG00000041225	MOUSE18_7_PE1	HBG067671
ENSMUSG00000052593	MOUSE12_22_PE12	HBG000006
ENSMUSG00000038777	MOUSE3_98_PE18	HBG071390
ENSMUSG00000028064	MOUSE3_91_PE36	HBG071390
ENSMUSG00000024164	MOUSE17_60_PE1	HBG037389
ENSMUSG00000029636	MOUSE5_152_PE5	HBG074547
ENSMUSG00000041408	MOUSE14_35_PE1	HBG038404
ENSMUSG00000060961	MOUSE5_93_PE2	HBG050769
ENSMUSG00000068323	MOUSE6_82_PE26	HBG050769
ENSMUSG00000051391	MOUSE5_141_PE14	HBG068683
ENSMUSG00000028488	MOUSE4_87_PE3	HBG058975
ENSMUSG00000031097	MOUSE7_147_PE3	HBG059108
ENSMUSG00000030064	MOUSE6_97_PE8	HBG020105
ENSMUSG00000033032	MOUSE18_64_PE26	HBG057409
ENSMUSG00000045767	MOUSE13_58_PE23	HBG069586
ENSMUSG00000036893	MOUSE2_25_PE17	HBG022369
ENSMUSG00000025241	MOUSE9_128_PE10	HBG022236
ENSMUSG00000040697	MOUSE4_145_PE33	HBG038148
ENSMUSG00000005470	MOUSE8_88_PE24	HBG082844
ENSMUSG00000053930	MOUSE11_69_PE1	HBG061666
ENSMUSG00000053550	MOUSE7_5_PE26	HBG061666
ENSMUSG00000061981	MOUSE11_81_PE18	HBG010191
ENSMUSG00000052581	MOUSE6_79_PE2	HBG057641
ENSMUSG00000014177	MOUSE11_65_PE15	HBG031348
ENSMUSG00000041890	MOUSE5_118_PE24	HBG059436
ENSMUSG00000048402	MOUSE1_123_PE12	HBG058161
ENSMUSG00000068747	MOUSE3_111_PE32	HBG038584
ENSMUSG00000028136	MOUSE3_97_PE23	HBG001061
ENSMUSG00000042678	MOUSE11_62_PE40	HBG021571
ENSMUSG00000022797	MOUSE16_34_PE19	HBG058458
ENSMUSG00000040339	MOUSE3_112_PE19	HBG019838
ENSMUSG00000039157	MOUSE2_33_PE30	HBG019838
ENSMUSG00000038056	MOUSE5_26_PE12	HBG042287
ENSMUSG00000020593	MOUSE12_17_PE2	HBG059280
ENSMUSG00000025026	MOUSE19_55_PE2	HBG006830
ENSMUSG00000023232	MOUSE4_134_PE12	HBG061159
ENSMUSG00000061576	MOUSE5_29_PE2	HBG058243
ENSMUSG00000035000	MOUSE2_63_PE1	HBG058243
ENSMUSG00000000392	MOUSE2_63_PE3	HBG058243
ENSMUSG00000026782	MOUSE1_63_PE2	HBG071644
ENSMUSG00000041483	MOUSE1_141_PE11	HBG021682
ENSMUSG00000020473	MOUSE11_6_PE23	HBG036142
ENSMUSG00000027408	MOUSE2_132_PE5	HBG036142
ENSMUSG00000037697	MOUSE14_46_PE4	HBG048873
ENSMUSG00000041720	MOUSE16_18_PE22	HBG003863
ENSMUSG00000039768	MOUSE4_155_PE3	HBG003411
ENSMUSG00000063506	MOUSE14_33_PE7	HBG060551
ENSMUSG00000030516	MOUSE7_67_PE6	HBG038349
ENSMUSG00000028433	MOUSE4_42_PE18	HBG023753
ENSMUSG00000055373	MOUSE4_27_PE1	HBG069103
ENSMUSG00000036412	MOUSE18_64_PE7	HBG040904
ENSMUSG00000026489	MOUSE1_186_PE8	HBG027149
ENSMUSG00000045967	MOUSE2_22_PE6	HBG038108
ENSMUSG00000034424	MOUSE8_122_PE8	HBG076923
ENSMUSG00000020859	MOUSE11_97_PE8	HBG006894
ENSMUSG00000026409	MOUSE1_135_PE5	HBG025660
ENSMUSG00000025271	MOUSEX_146_PE6	HBG025660
ENSMUSG00000033453	MOUSE9_32_PE2	HBG056504
ENSMUSG00000028174	MOUSE3_164_PE2	HBG005228
ENSMUSG00000032066	MOUSE9_53_PE4	HBG005228
ENSMUSG00000037348	MOUSE4_138_PE12	HBG022352
ENSMUSG00000030495	MOUSE7_36_PE4	HBG088408
ENSMUSG00000030093	MOUSE6_91_PE1	HBG069724
ENSMUSG00000027840	MOUSE3_108_PE10	HBG069724
ENSMUSG00000053970	MOUSE9_110_PE25	HBG037812
ENSMUSG00000027075	MOUSE2_86_PE5	HBG057085
ENSMUSG00000027074	MOUSE2_86_PE7	HBG057085
ENSMUSG00000017740	MOUSE2_167_PE23	HBG010023
ENSMUSG00000025658	MOUSEX_154_PE3	HBG020061
ENSMUSG00000049647	MOUSE11_7_PE19	HBG037538
ENSMUSG00000040722	MOUSE9_60_PE3	HBG081757
ENSMUSG00000037573	MOUSE11_97_PE14	HBG021412
ENSMUSG00000032187	MOUSE9_22_PE41	HBG058949
ENSMUSG00000042677	MOUSE4_128_PE23	HBG042645
ENSMUSG00000026558	MOUSE1_173_PE3	HBG003540
ENSMUSG00000020658	MOUSE12_4_PE18	HBG002761
ENSMUSG00000038781	MOUSE17_58_PE14	HBG059134
ENSMUSG00000021025	MOUSE12_58_PE12	HBG022329
ENSMUSG00000020361	MOUSE11_55_PE3	HBG087501
ENSMUSG00000052613	MOUSE10_77_PE1	HBG056730
ENSMUSG00000027239	MOUSE2_93_PE6	HBG085658
ENSMUSG00000057335	MOUSE1_183_PE1	HBG022082
ENSMUSG00000038143	MOUSE8_49_PE8	HBG022918
ENSMUSG00000004364	MOUSE1_82_PE3	HBG026015
ENSMUSG00000042216	MOUSE5_117_PE8	HBG068080
ENSMUSG00000042207	MOUSE1_139_PE17	HBG038046
ENSMUSG00000033615	MOUSE5_112_PE15	HBG079344
ENSMUSG00000042507	MOUSE12_88_PE22	HBG075323
ENSMUSG00000024900	MOUSE19_4_PE5	HBG058303
ENSMUSG00000026853	MOUSE2_31_PE33	HBG058303
ENSMUSG00000047945	MOUSE4_133_PE23	HBG070195
ENSMUSG00000038079	MOUSE1_61_PE23	HBG023351
ENSMUSG00000028525	MOUSE4_105_PE1	HBG003641
ENSMUSG00000031842	MOUSE8_75_PE19	HBG003641
ENSMUSG00000032020	MOUSE9_43_PE4	HBG055589
ENSMUSG00000039474	MOUSE5_39_PE12	HBG024796
ENSMUSG00000018008	MOUSE15_82_PE5	HBG009306
ENSMUSG00000021608	MOUSE13_76_PE7	HBG058227
ENSMUSG00000049686	MOUSE5_127_PE13	HBG005700
ENSMUSG00000041794	MOUSE9_125_PE1	HBG087083
ENSMUSG00000069237	MOUSE13_49_PE2	HBG057203
ENSMUSG00000022052	MOUSE14_67_PE17	HBG008071
ENSMUSG00000027931	MOUSE3_93_PE34	HBG038034
ENSMUSG00000037933	MOUSE13_51_PE16	HBG024501
ENSMUSG00000003452	MOUSE6_150_PE10	HBG024501
ENSMUSG00000064115	MOUSE16_70_PE1	HBG020650
ENSMUSG00000051650	MOUSE11_24_PE1	HBG089374
ENSMUSG00000002984	MOUSE7_20_PE7	HBG023739
ENSMUSG00000041570	MOUSE1_141_PE6	HBG024946
ENSMUSG00000026933	MOUSE2_27_PE1	HBG024946
ENSMUSG00000073740	MOUSE1_7_PE4	HBG024946
ENSMUSG00000044433	MOUSE8_4_PE14	HBG024946
ENSMUSG00000000544	MOUSE1_172_PE6	HBG084493
ENSMUSG00000017412	MOUSE2_53_PE1	HBG058054
ENSMUSG00000057914	MOUSE2_15_PE5	HBG058054
ENSMUSG00000038967	MOUSE11_98_PE10	HBG002420
ENSMUSG00000020886	MOUSE11_73_PE30	HBG071201
ENSMUSG00000024313	MOUSE18_22_PE14	HBG050530
ENSMUSG00000011752	MOUSE19_43_PE10	HBG061332
ENSMUSG00000069106	MOUSE3_12_PE1	HBG061332
ENSMUSG00000066695	MOUSE7_28_PE15	HBG061332
ENSMUSG00000030753	MOUSE7_102_PE5	HBG037844
ENSMUSG00000024134	MOUSE17_89_PE7	HBG044494
ENSMUSG00000001143	MOUSE1_38_PE10	HBG008038
ENSMUSG00000050144	MOUSE3_91_PE35	HBG000141
ENSMUSG00000061411	MOUSE2_155_PE15	HBG022472
ENSMUSG00000040694	MOUSE17_50_PE23	HBG026055
ENSMUSG00000041482	MOUSE18_66_PE4	HBG078467
ENSMUSG00000063455	MOUSE6_40_PE5	HBG057464
ENSMUSG00000055214	MOUSE1_182_PE2	HBG058964
ENSMUSG00000021604	MOUSE13_76_PE3	HBG059041
ENSMUSG00000026942	MOUSE2_26_PE49	HBG084752
ENSMUSG00000024109	MOUSE17_94_PE1	HBG023159
ENSMUSG00000033768	MOUSE19_7_PE34	HBG023159
ENSMUSG00000006005	MOUSE1_155_PE8	HBG045481
ENSMUSG00000019866	MOUSE10_45_PE13	HBG023460
ENSMUSG00000045731	MOUSE14_66_PE5	HBG042429
ENSMUSG00000018736	MOUSE11_72_PE1	HBG018212
ENSMUSG00000023393	MOUSE2_183_PE24	HBG001773
ENSMUSG00000046312	MOUSE4_43_PE5	HBG037332
ENSMUSG00000028633	MOUSE4_124_PE4	HBG016403
ENSMUSG00000027883	MOUSE3_112_PE9	HBG095343
ENSMUSG00000036902	MOUSE8_90_PE10	HBG021057
ENSMUSG00000063626	MOUSE8_31_PE1	HBG022951
ENSMUSG00000052539	MOUSE3_107_PE20	HBG058269
ENSMUSG00000039831	MOUSE3_125_PE8	HBG058608
ENSMUSG00000041578	MOUSE7_16_PE3	HBG043529
ENSMUSG00000036560	MOUSE7_32_PE11	HBG024660
ENSMUSG00000021702	MOUSE13_97_PE10	HBG019464
ENSMUSG00000040152	MOUSE2_119_PE1	HBG019464
ENSMUSG00000029718	MOUSE5_143_PE16	HBG026554
ENSMUSG00000028033	MOUSE1_23_PE10	HBG037646
ENSMUSG00000016346	MOUSE2_184_PE1	HBG037646
ENSMUSG00000016128	MOUSE5_157_PE1	HBG056432
ENSMUSG00000026510	MOUSE1_188_PE12	HBG056759
ENSMUSG00000020902	MOUSE11_71_PE6	HBG021255
ENSMUSG00000028360	MOUSE3_158_PE8	HBG058583
ENSMUSG00000023978	MOUSE17_49_PE4	HBG074836
ENSMUSG00000071648	MOUSE19_10_PE8	HBG074836
ENSMUSG00000027173	MOUSE2_106_PE6	HBG025848
ENSMUSG00000025473	MOUSE7_144_PE16	HBG055404
ENSMUSG00000030881	MOUSE7_109_PE18	HBG006850
ENSMUSG00000003657	MOUSE8_115_PE14	HBG001048
ENSMUSG00000071717	MOUSEX_98_PE2	HBG010906
ENSMUSG00000066681	MOUSE1_178_PE36	HBG010906
ENSMUSG00000066806	MOUSE9_27_PE3	HBG010906
ENSMUSG00000068466	MOUSE7_106_PE6	HBG010906
ENSMUSG00000069912	MOUSE3_23_PE3	HBG010906
ENSMUSG00000073449	MOUSE17_21_PE1	HBG010906
ENSMUSG00000064154	MOUSE4_69_PE1	HBG010906
ENSMUSG00000070591	MOUSE4_150_PE13	HBG010906
ENSMUSG00000073712	MOUSE4_150_PE11	HBG010906
ENSMUSG00000073709	MOUSE4_151_PE1	HBG010906
ENSMUSG00000066661	MOUSE8_15_PE9	HBG010906
ENSMUSG00000066530	MOUSE7_43_PE2	HBG010906
ENSMUSG00000066551	MOUSE5_155_PE1	HBG010906
ENSMUSG00000057024	MOUSE15_77_PE11	HBG010906
ENSMUSG00000070058	MOUSE8_35_PE8	HBG010906
ENSMUSG00000064003	MOUSE19_30_PE12	HBG010906
ENSMUSG00000067105	MOUSE5_101_PE4	HBG010906
ENSMUSG00000062477	MOUSE6_132_PE2	HBG010906
ENSMUSG00000067974	MOUSE5_5_PE6	HBG010906
ENSMUSG00000066275	MOUSE11_66_PE1	HBG010906
ENSMUSG00000069082	MOUSE15_66_PE2	HBG010906
ENSMUSG00000073084	MOUSEX_75_PE1	HBG010906
ENSMUSG00000071171	MOUSE6_128_PE1	HBG010906
ENSMUSG00000066504	MOUSE12_48_PE1	HBG010906
ENSMUSG00000067666	MOUSE17_85_PE7	HBG010906
ENSMUSG00000069847	MOUSE2_154_PE33	HBG010906
ENSMUSG00000067902	MOUSEX_53_PE2	HBG010906
ENSMUSG00000071027	MOUSE8_132_PE9	HBG010906
ENSMUSG00000066002	MOUSE4_150_PE3	HBG010906
ENSMUSG00000054717	MOUSE8_61_PE4	HBG010906
ENSMUSG00000050446	MOUSE9_16_PE20	HBG010906
ENSMUSG00000062340	MOUSE10_26_PE17	HBG010906
ENSMUSG00000072862	MOUSEX_158_PE4	HBG078489
ENSMUSG00000043962	MOUSE4_129_PE15	HBG078489
ENSMUSG00000028399	MOUSE4_78_PE2	HBG009950
ENSMUSG00000064310	MOUSE16_58_PE2	HBG025846
ENSMUSG00000000805	MOUSE11_88_PE1	HBG089282
ENSMUSG00000032280	MOUSE9_64_PE2	HBG000722
ENSMUSG00000031511	MOUSE8_12_PE14	HBG023662
ENSMUSG00000032105	MOUSE9_46_PE14	HBG059598
ENSMUSG00000022636	MOUSE16_55_PE2	HBG061303
ENSMUSG00000005089	MOUSE2_104_PE1	HBG088942
ENSMUSG00000066568	MOUSE7_35_PE11	HBG047913
ENSMUSG00000036053	MOUSE2_53_PE5	HBG087023
ENSMUSG00000021794	MOUSE14_34_PE14	HBG005542
ENSMUSG00000041351	MOUSE4_141_PE14	HBG028675
ENSMUSG00000034220	MOUSE1_97_PE15	HBG048156
ENSMUSG00000029569	MOUSE6_15_PE1	HBG024164
ENSMUSG00000022507	MOUSE16_9_PE10	HBG022560
ENSMUSG00000036258	MOUSEX_58_PE7	HBG022560
ENSMUSG00000036867	MOUSE9_67_PE1	HBG014487
ENSMUSG00000048915	MOUSE17_65_PE1	HBG087016
ENSMUSG00000027954	MOUSE3_92_PE29	HBG087016
ENSMUSG00000018761	MOUSE11_72_PE56	HBG003218
ENSMUSG00000034863	MOUSE8_76_PE13	HBG025143
ENSMUSG00000000134	MOUSEX_7_PE22	HBG025981
ENSMUSG00000028337	MOUSE4_48_PE4	HBG078773
ENSMUSG00000027993	MOUSE3_87_PE4	HBG037516
ENSMUSG00000026766	MOUSE2_50_PE4	HBG023315
ENSMUSG00000026797	MOUSE2_34_PE12	HBG002352
ENSMUSG00000051401	MOUSE18_42_PE4	HBG040980
ENSMUSG00000020572	MOUSE12_34_PE5	HBG024156
ENSMUSG00000004535	MOUSE6_53_PE4	HBG058895
ENSMUSG00000022103	MOUSE14_71_PE26	HBG056765
ENSMUSG00000020661	MOUSE12_4_PE14	HBG044562
ENSMUSG00000000632	MOUSE11_81_PE11	HBG021331
ENSMUSG00000042766	MOUSE3_92_PE24	HBG023686
ENSMUSG00000052698	MOUSE9_70_PE12	HBG019489
ENSMUSG00000027397	MOUSE2_130_PE15	HBG002166
ENSMUSG00000035228	MOUSE7_5_PE41	HBG057159
ENSMUSG00000028348	MOUSE4_50_PE7	HBG059094
ENSMUSG00000020429	MOUSE11_8_PE2	HBG068131
ENSMUSG00000025020	MOUSE19_43_PE6	HBG056924
ENSMUSG00000031748	MOUSE8_98_PE9	HBG085795
ENSMUSG00000026712	MOUSE2_15_PE3	HBG070346
ENSMUSG00000036197	MOUSE15_97_PE1	HBG010004
ENSMUSG00000045229	MOUSE4_12_PE13	HBG010004
ENSMUSG00000038582	MOUSE5_126_PE14	HBG002114
ENSMUSG00000026748	MOUSE2_17_PE3	HBG087870
ENSMUSG00000029410	MOUSE5_96_PE13	HBG024776
ENSMUSG00000069601	MOUSE10_72_PE4	HBG023688
ENSMUSG00000021969	MOUSE14_58_PE17	HBG060209
ENSMUSG00000040883	MOUSE9_23_PE8	HBG024937
ENSMUSG00000053768	MOUSE6_34_PE2	HBG023701
ENSMUSG00000030086	MOUSE6_89_PE1	HBG023701
ENSMUSG00000027848	MOUSE3_107_PE5	HBG037849
ENSMUSG00000032114	MOUSE9_46_PE28	HBG020503
ENSMUSG00000028402	MOUSE4_83_PE2	HBG044261
ENSMUSG00000057123	MOUSE3_100_PE7	HBG089565
ENSMUSG00000047797	MOUSEX_98_PE14	HBG089565
ENSMUSG00000036333	MOUSE12_26_PE11	HBG045040
ENSMUSG00000025812	MOUSE8_133_PE1	HBG088744
ENSMUSG00000024533	MOUSE18_70_PE11	HBG047870
ENSMUSG00000015243	MOUSE4_55_PE1	HBG063292
ENSMUSG00000030082	MOUSE6_87_PE29	HBG022251
ENSMUSG00000000394	MOUSE2_63_PE2	HBG059509
ENSMUSG00000054986	MOUSE11_4_PE54	HBG033067
ENSMUSG00000019368	MOUSE11_4_PE53	HBG033067
ENSMUSG00000003585	MOUSE11_5_PE2	HBG033067
ENSMUSG00000042686	MOUSE1_18_PE10	HBG082114
ENSMUSG00000025318	MOUSE8_127_PE6	HBG082114
ENSMUSG00000049721	MOUSE11_4_PE52	HBG023185
ENSMUSG00000026414	MOUSE1_140_PE19	HBG038625
ENSMUSG00000028037	MOUSE3_156_PE1	HBG056255
ENSMUSG00000031169	MOUSEX_8_PE27	HBG021093
ENSMUSG00000045659	MOUSE7_120_PE1	HBG023717
ENSMUSG00000035199	MOUSE6_97_PE6	HBG078809
ENSMUSG00000006476	MOUSE2_26_PE6	HBG057952
ENSMUSG00000041460	MOUSE6_119_PE4	HBG024582
ENSMUSG00000040118	MOUSE5_17_PE2	HBG024582
ENSMUSG00000050043	MOUSE2_85_PE18	HBG009901
ENSMUSG00000071035	MOUSE17_91_PE4	HBG009901
ENSMUSG00000037868	MOUSE10_69_PE6	HBG025078
ENSMUSG00000026211	MOUSE1_77_PE41	HBG073533
ENSMUSG00000029188	MOUSE5_55_PE9	HBG060602
ENSMUSG00000021490	MOUSE13_58_PE1	HBG060602
ENSMUSG00000035239	MOUSE7_103_PE12	HBG024011
ENSMUSG00000032531	MOUSE9_106_PE13	HBG044095
ENSMUSG00000003778	MOUSE18_36_PE18	HBG056996
ENSMUSG00000020577	MOUSE12_37_PE5	HBG058110
ENSMUSG00000062252	MOUSE17_30_PE29	HBG024149
ENSMUSG00000021390	MOUSE13_52_PE9	HBG025368
ENSMUSG00000020282	MOUSE11_33_PE10	HBG052279
ENSMUSG00000020346	MOUSE11_51_PE27	HBG025003
ENSMUSG00000028707	MOUSE4_119_PE8	HBG023699
ENSMUSG00000037492	MOUSE8_26_PE1	HBG058742
ENSMUSG00000013089	MOUSE16_23_PE16	HBG079073
ENSMUSG00000044690	MOUSE10_74_PE1	HBG079073
ENSMUSG00000031139	MOUSEX_58_PE3	HBG056411
ENSMUSG00000021477	MOUSE13_67_PE11	HBG057984
ENSMUSG00000050345	MOUSE13_63_PE5	HBG057984
ENSMUSG00000074870	MOUSE13_64_PE2	HBG057984
ENSMUSG00000074871	MOUSE13_64_PE1	HBG057984
ENSMUSG00000057446	MOUSE13_63_PE14	HBG057984
ENSMUSG00000021440	MOUSE13_63_PE15	HBG057984
ENSMUSG00000021441	MOUSE13_63_PE13	HBG057984
ENSMUSG00000021439	MOUSE13_63_PE11	HBG057984
ENSMUSG00000055679	MOUSE13_63_PE12	HBG057984
ENSMUSG00000055298	MOUSE13_63_PE10	HBG057984
ENSMUSG00000042243	MOUSE13_63_PE3	HBG057984
ENSMUSG00000056728	MOUSE13_63_PE4	HBG057984
ENSMUSG00000075334	MOUSE2_54_PE2	HBG060495
ENSMUSG00000025240	MOUSE9_128_PE3	HBG022235
ENSMUSG00000032519	MOUSE9_124_PE14	HBG022122
ENSMUSG00000020109	MOUSE10_62_PE4	HBG078137
ENSMUSG00000026775	MOUSE2_24_PE7	HBG039595
ENSMUSG00000034275	MOUSE9_29_PE3	HBG038472
ENSMUSG00000046480	MOUSE9_47_PE18	HBG088087
ENSMUSG00000028098	MOUSE3_100_PE2	HBG088265
ENSMUSG00000028538	MOUSE4_121_PE15	HBG059435
ENSMUSG00000051413	MOUSE2_155_PE7	HBG060438
ENSMUSG00000029033	MOUSE4_159_PE34	HBG059343
ENSMUSG00000022788	MOUSE16_17_PE9	HBG026386
ENSMUSG00000045326	MOUSE3_112_PE14	HBG038587
ENSMUSG00000026790	MOUSE2_31_PE4	HBG038719
ENSMUSG00000059149	MOUSE1_136_PE28	HBG020782
ENSMUSG00000070803	MOUSE4_124_PE5	HBG068934
ENSMUSG00000022555	MOUSE15_79_PE66	HBG012092
ENSMUSG00000023259	MOUSE9_113_PE20	HBG039543
ENSMUSG00000031691	MOUSE8_89_PE43	HBG002524
ENSMUSG00000021217	MOUSE7_37_PE2	HBG021121
ENSMUSG00000014602	MOUSE1_97_PE22	HBG000610
ENSMUSG00000022390	MOUSE15_85_PE9	HBG022571
ENSMUSG00000022240	MOUSE15_32_PE1	HBG084775
ENSMUSG00000061731	MOUSE15_56_PE1	HBG005644
ENSMUSG00000057337	MOUSE10_62_PE9	HBG055232
ENSMUSG00000051079	MOUSE1_149_PE1	HBG050841
ENSMUSG00000026193	MOUSE1_73_PE9	HBG023336
ENSMUSG00000039062	MOUSE7_82_PE23	HBG005692
ENSMUSG00000027254	MOUSE2_122_PE40	HBG021949
ENSMUSG00000022546	MOUSE15_80_PE19	HBG004127
ENSMUSG00000051950	MOUSE5_155_PE18	HBG034976
ENSMUSG00000040511	MOUSE7_20_PE15	HBG090084
ENSMUSG00000062300	MOUSE7_20_PE9	HBG090084
ENSMUSG00000032446	MOUSE9_123_PE1	HBG056617
ENSMUSG00000036833	MOUSE2_26_PE5	HBG029603
ENSMUSG00000036565	MOUSE5_146_PE14	HBG061243
ENSMUSG00000052135	MOUSE4_123_PE10	HBG057264
ENSMUSG00000048756	MOUSE10_43_PE22	HBG057264
ENSMUSG00000024750	MOUSE19_22_PE3	HBG059137
ENSMUSG00000031688	MOUSE8_83_PE2	HBG094956
ENSMUSG00000027634	MOUSE2_159_PE2	HBG078788
ENSMUSG00000005125	MOUSE15_70_PE2	HBG078788
ENSMUSG00000032601	MOUSE9_113_PE12	HBG003653
ENSMUSG00000021453	MOUSE13_54_PE6	HBG023896
ENSMUSG00000035131	MOUSE1_151_PE1	HBG023343
ENSMUSG00000040907	MOUSE7_25_PE55	HBG032080
ENSMUSG00000003500	MOUSE6_31_PE2	HBG003682
ENSMUSG00000046811	MOUSE11_73_PE65	HBG000509
ENSMUSG00000022044	MOUSE14_67_PE6	HBG068160
ENSMUSG00000038733	MOUSE1_187_PE13	HBG015157
ENSMUSG00000000861	MOUSE11_25_PE10	HBG019697
ENSMUSG00000047126	MOUSE11_89_PE15	HBG007426
ENSMUSG00000020262	MOUSE10_80_PE8	HBG059014
ENSMUSG00000047085	MOUSE7_45_PE43	HBG021244
ENSMUSG00000025340	MOUSE5_135_PE18	HBG039578
ENSMUSG00000026879	MOUSE2_36_PE22	HBG056406
ENSMUSG00000022218	MOUSE14_56_PE32	HBG019450
ENSMUSG00000039109	MOUSE13_39_PE2	HBG019450
ENSMUSG00000037797	MOUSE3_142_PE14	HBG014277
ENSMUSG00000074207	MOUSE3_142_PE10	HBG014277
ENSMUSG00000055301	MOUSE3_142_PE9	HBG014277
ENSMUSG00000074206	MOUSE3_142_PE12	HBG014277
ENSMUSG00000053054	MOUSE3_142_PE11	HBG014277
ENSMUSG00000074001	MOUSE9_126_PE13	HBG022147
ENSMUSG00000042870	MOUSE8_79_PE3	HBG026088
ENSMUSG00000037827	MOUSE6_129_PE11	HBG026088
ENSMUSG00000020295	MOUSE11_33_PE20	HBG061083
ENSMUSG00000073063	MOUSE11_33_PE17	HBG061083
ENSMUSG00000069917	MOUSE11_33_PE19	HBG061083
ENSMUSG00000069919	MOUSE11_33_PE16	HBG061083
ENSMUSG00000024189	MOUSE17_28_PE10	HBG061083
ENSMUSG00000052187	MOUSE7_107_PE37	HBG061083
ENSMUSG00000052305	MOUSE7_107_PE34	HBG061083
ENSMUSG00000052217	MOUSE7_107_PE36	HBG061083
ENSMUSG00000053510	MOUSE4_112_PE2	HBG008666
ENSMUSG00000025427	MOUSE18_81_PE17	HBG019112
ENSMUSG00000040212	MOUSE7_47_PE29	HBG081868
ENSMUSG00000030402	MOUSE7_19_PE34	HBG037562
ENSMUSG00000038115	MOUSE6_126_PE5	HBG061448
ENSMUSG00000055489	MOUSE7_53_PE6	HBG061448
ENSMUSG00000037752	MOUSE4_136_PE18	HBG067575
ENSMUSG00000026207	MOUSE1_77_PE33	HBG058445
ENSMUSG00000051703	MOUSE1_77_PE39	HBG053571
ENSMUSG00000056296	MOUSE14_13_PE2	HBG024157
ENSMUSG00000037605	MOUSE5_85_PE2	HBG059501
ENSMUSG00000060969	MOUSE13_75_PE1	HBG056959
ENSMUSG00000028439	MOUSE4_43_PE9	HBG060206
ENSMUSG00000033491	MOUSE9_90_PE11	HBG023237
ENSMUSG00000003847	MOUSE8_112_PE16	HBG021103
ENSMUSG00000042451	MOUSE1_139_PE2	HBG089847
ENSMUSG00000068745	MOUSE3_111_PE33	HBG089847
ENSMUSG00000030067	MOUSE6_99_PE1	HBG089918
ENSMUSG00000038042	MOUSE13_51_PE2	HBG057466
ENSMUSG00000022548	MOUSE16_33_PE5	HBG005794
ENSMUSG00000000184	MOUSE6_127_PE13	HBG078772
ENSMUSG00000008734	MOUSE7_122_PE19	HBG025980
ENSMUSG00000028655	MOUSE4_126_PE7	HBG087583
ENSMUSG00000029674	MOUSE5_140_PE8	HBG057930
ENSMUSG00000046985	MOUSE5_46_PE20	HBG026173
ENSMUSG00000009394	MOUSE6_115_PE4	HBG085099
ENSMUSG00000037166	MOUSE7_30_PE20	HBG037758
ENSMUSG00000031701	MOUSE8_90_PE9	HBG059749
ENSMUSG00000005483	MOUSE8_88_PE13	HBG059749
ENSMUSG00000004069	MOUSE16_5_PE14	HBG059749
ENSMUSG00000007880	MOUSE4_137_PE23	HBG023462
ENSMUSG00000039671	MOUSE2_168_PE9	HBG050276
ENSMUSG00000039245	MOUSE7_42_PE5	HBG050276
ENSMUSG00000047495	MOUSE8_15_PE10	HBG058953
ENSMUSG00000003279	MOUSE17_74_PE1	HBG058953
ENSMUSG00000061689	MOUSE2_158_PE28	HBG058953
ENSMUSG00000016487	MOUSE6_147_PE12	HBG020868
ENSMUSG00000027012	MOUSE2_72_PE9	HBG057201
ENSMUSG00000062372	MOUSE5_32_PE14	HBG051173
ENSMUSG00000048612	MOUSE19_39_PE2	HBG051173
ENSMUSG00000025475	MOUSE7_144_PE9	HBG025918
ENSMUSG00000054452	MOUSE10_84_PE48	HBG084303
ENSMUSG00000024560	MOUSE18_77_PE11	HBG006480
ENSMUSG00000019856	MOUSE10_56_PE2	HBG083985
ENSMUSG00000020805	MOUSE11_75_PE9	HBG078888
ENSMUSG00000028156	MOUSE3_142_PE18	HBG090161
ENSMUSG00000073066	MOUSE12_64_PE1	HBG090161
ENSMUSG00000029314	MOUSE5_104_PE17	HBG043064
ENSMUSG00000029050	MOUSE4_158_PE24	HBG026478
ENSMUSG00000021196	MOUSE13_7_PE2	HBG058250
ENSMUSG00000032343	MOUSE9_83_PE13	HBG025606
ENSMUSG00000024897	MOUSE19_24_PE12	HBG041828
ENSMUSG00000036427	MOUSE7_35_PE9	HBG013544
ENSMUSG00000041078	MOUSE14_35_PE3	HBG021253
ENSMUSG00000059003	MOUSE16_10_PE1	HBG021253
ENSMUSG00000030209	MOUSE6_136_PE2	HBG021253
ENSMUSG00000010095	MOUSE19_9_PE12	HBG023167
ENSMUSG00000026159	MOUSE1_84_PE10	HBG057096
ENSMUSG00000026674	MOUSE1_176_PE3	HBG036813
ENSMUSG00000021356	MOUSE13_32_PE7	HBG058306
ENSMUSG00000021037	MOUSE12_91_PE17	HBG075822
ENSMUSG00000028654	MOUSE4_126_PE8	HBG037557
ENSMUSG00000029276	MOUSE5_111_PE11	HBG021873
ENSMUSG00000045287	MOUSE11_78_PE18	HBG056890
ENSMUSG00000050896	MOUSE2_86_PE6	HBG056890
ENSMUSG00000058248	MOUSE1_198_PE6	HBG056841
ENSMUSG00000040170	MOUSE1_168_PE18	HBG020703
ENSMUSG00000026692	MOUSE1_168_PE15	HBG020703
ENSMUSG00000040181	MOUSE1_168_PE16	HBG020703
ENSMUSG00000026691	MOUSE1_168_PE19	HBG020703
ENSMUSG00000028088	MOUSE3_100_PE12	HBG020703
ENSMUSG00000051081	MOUSE1_172_PE13	HBG020703
ENSMUSG00000026560	MOUSE1_172_PE14	HBG020703
ENSMUSG00000031884	MOUSE8_109_PE28	HBG061370
ENSMUSG00000061825	MOUSE8_109_PE27	HBG061370
ENSMUSG00000050097	MOUSE8_109_PE26	HBG061370
ENSMUSG00000031886	MOUSE8_109_PE29	HBG061370
ENSMUSG00000031877	MOUSE8_109_PE30	HBG061370
ENSMUSG00000055730	MOUSE8_109_PE25	HBG061370
ENSMUSG00000062826	MOUSE8_109_PE24	HBG061370
ENSMUSG00000056973	MOUSE8_98_PE2	HBG061370
ENSMUSG00000057400	MOUSE8_98_PE1	HBG061370
ENSMUSG00000057074	MOUSE8_98_PE5	HBG061370
ENSMUSG00000061959	MOUSE8_98_PE3	HBG061370
ENSMUSG00000031725	MOUSE8_98_PE4	HBG061370
ENSMUSG00000074156	MOUSE8_98_PE6	HBG061370
ENSMUSG00000071047	MOUSE8_97_PE7	HBG061370
ENSMUSG00000069922	MOUSE8_110_PE3	HBG061370
ENSMUSG00000062181	MOUSE8_110_PE5	HBG061370
ENSMUSG00000060560	MOUSE8_110_PE6	HBG061370
ENSMUSG00000058019	MOUSE8_98_PE8	HBG061370
ENSMUSG00000027668	MOUSE3_34_PE7	HBG056600
ENSMUSG00000070880	MOUSE2_71_PE6	HBG024398
ENSMUSG00000068154	MOUSE2_148_PE3	HBG020140
ENSMUSG00000035246	MOUSEX_90_PE6	HBG028500
ENSMUSG00000059824	MOUSE7_47_PE11	HBG086053
ENSMUSG00000022389	MOUSE15_85_PE11	HBG086053
ENSMUSG00000030549	MOUSE7_82_PE11	HBG061658
ENSMUSG00000039194	MOUSE7_82_PE5	HBG025662
ENSMUSG00000010080	MOUSE11_97_PE28	HBG075910
ENSMUSG00000001334	MOUSE4_133_PE9	HBG087578
ENSMUSG00000038552	MOUSE5_33_PE40	HBG087578
ENSMUSG00000032515	MOUSE9_124_PE12	HBG022118
ENSMUSG00000031543	MOUSE8_25_PE1	HBG007090
ENSMUSG00000053693	MOUSE8_89_PE32	HBG030008
ENSMUSG00000031833	MOUSE8_75_PE25	HBG030008
ENSMUSG00000034570	MOUSE11_4_PE31	HBG027551
ENSMUSG00000006127	MOUSE11_78_PE37	HBG027551
ENSMUSG00000029270	MOUSE5_111_PE20	HBG025889
ENSMUSG00000045034	MOUSE13_97_PE5	HBG021997
ENSMUSG00000006345	MOUSE10_78_PE14	HBG020985
ENSMUSG00000006344	MOUSE10_78_PE15	HBG020985
ENSMUSG00000042535	MOUSE15_83_PE10	HBG000791
ENSMUSG00000059246	MOUSE9_73_PE1	HBG010105
ENSMUSG00000033207	MOUSE19_24_PE6	HBG058461
ENSMUSG00000074006	MOUSE7_101_PE18	HBG057439
ENSMUSG00000041115	MOUSEX_148_PE5	HBG022577
ENSMUSG00000032776	MOUSE7_74_PE1	HBG002067
ENSMUSG00000032131	MOUSE9_46_PE17	HBG026469
ENSMUSG00000002227	MOUSE3_108_PE6	HBG023833
ENSMUSG00000031447	MOUSE8_14_PE15	HBG059282
ENSMUSG00000056666	MOUSE6_71_PE25	HBG019716
ENSMUSG00000071722	MOUSEX_92_PE2	HBG059144
ENSMUSG00000058211	MOUSE18_89_PE4	HBG059144
ENSMUSG00000075499	MOUSEY_3_PE10	HBG059144
ENSMUSG00000066751	MOUSE5_130_PE5	HBG059144
ENSMUSG00000046550	MOUSEX_150_PE2	HBG059144
ENSMUSG00000073097	MOUSEX_72_PE33	HBG059144
ENSMUSG00000073098	MOUSEX_72_PE32	HBG059144
ENSMUSG00000067708	MOUSEX_4_PE8	HBG059144
ENSMUSG00000073305	MOUSEX_4_PE2	HBG059144
ENSMUSG00000073251	MOUSEX_31_PE3	HBG059144
ENSMUSG00000073304	MOUSEX_4_PE3	HBG059144
ENSMUSG00000033760	MOUSE19_5_PE44	HBG023178
ENSMUSG00000056951	MOUSE19_5_PE45	HBG023178
ENSMUSG00000022892	MOUSE16_88_PE7	HBG057100
ENSMUSG00000020834	MOUSE11_81_PE15	HBG077293
ENSMUSG00000023951	MOUSE17_48_PE1	HBG068114
ENSMUSG00000032593	MOUSE9_112_PE41	HBG068662
ENSMUSG00000026860	MOUSE2_31_PE27	HBG071697
ENSMUSG00000020321	MOUSE11_22_PE8	HBG002635
ENSMUSG00000024789	MOUSE19_30_PE13	HBG020470
ENSMUSG00000020122	MOUSE11_17_PE5	HBG058942
ENSMUSG00000045912	MOUSE10_82_PE18	HBG060553
ENSMUSG00000030523	MOUSE7_66_PE9	HBG095248
ENSMUSG00000038260	MOUSE7_46_PE55	HBG095248
ENSMUSG00000008843	MOUSE5_140_PE12	HBG075055
ENSMUSG00000047501	MOUSE5_140_PE15	HBG075055
ENSMUSG00000070473	MOUSE5_140_PE16	HBG075055
ENSMUSG00000050520	MOUSE16_91_PE6	HBG075055
ENSMUSG00000044003	MOUSEX_75_PE3	HBG075055
ENSMUSG00000073085	MOUSEX_74_PE5	HBG075055
ENSMUSG00000071738	MOUSEX_74_PE3	HBG075055
ENSMUSG00000057402	MOUSEX_151_PE10	HBG075055
ENSMUSG00000072100	MOUSEX_74_PE6	HBG075055
ENSMUSG00000043569	MOUSEX_124_PE1	HBG075055
ENSMUSG00000071700	MOUSEX_120_PE4	HBG075055
ENSMUSG00000071701	MOUSEX_120_PE3	HBG075055
ENSMUSG00000067402	MOUSEX_120_PE2	HBG075055
ENSMUSG00000039202	MOUSE7_82_PE4	HBG009243
ENSMUSG00000029778	MOUSE6_56_PE4	HBG089295
ENSMUSG00000032528	MOUSE9_126_PE6	HBG089295
ENSMUSG00000059588	MOUSE2_85_PE11	HBG089295
ENSMUSG00000018796	MOUSE8_49_PE1	HBG007666
ENSMUSG00000021036	MOUSE12_91_PE19	HBG047595
ENSMUSG00000027177	MOUSE2_105_PE14	HBG058273
ENSMUSG00000021943	MOUSE14_34_PE1	HBG038226
ENSMUSG00000030761	MOUSE7_101_PE16	HBG002510
ENSMUSG00000031299	MOUSEX_156_PE5	HBG000941
ENSMUSG00000047674	MOUSE3_145_PE1	HBG000941
ENSMUSG00000031425	MOUSEX_133_PE8	HBG023557
ENSMUSG00000036304	MOUSE16_46_PE8	HBG020830
ENSMUSG00000038859	MOUSE5_150_PE7	HBG057259
ENSMUSG00000038670	MOUSE7_45_PE49	HBG024478
ENSMUSG00000049550	MOUSE5_127_PE36	HBG071496
ENSMUSG00000050854	MOUSE4_121_PE34	HBG058421
ENSMUSG00000040490	MOUSE17_51_PE1	HBG021169
ENSMUSG00000006542	MOUSE1_76_PE33	HBG057644
ENSMUSG00000023959	MOUSE17_46_PE7	HBG068774
ENSMUSG00000034224	MOUSE8_125_PE5	HBG021036
ENSMUSG00000054728	MOUSE13_45_PE1	HBG058381
ENSMUSG00000027525	MOUSE2_181_PE1	HBG058381
ENSMUSG00000007476	MOUSE2_31_PE22	HBG019846
ENSMUSG00000046079	MOUSE5_109_PE8	HBG019846
ENSMUSG00000027359	MOUSE2_128_PE4	HBG074942
ENSMUSG00000032262	MOUSE9_87_PE6	HBG056003
ENSMUSG00000023927	MOUSE17_54_PE1	HBG021618
ENSMUSG00000032294	MOUSE9_62_PE10	HBG005677
ENSMUSG00000022237	MOUSE15_33_PE3	HBG024403
ENSMUSG00000039232	MOUSE10_13_PE3	HBG074703
ENSMUSG00000029070	MOUSE4_159_PE27	HBG020752
ENSMUSG00000034958	MOUSE10_84_PE21	HBG023808
ENSMUSG00000027457	MOUSE2_153_PE10	HBG076333
ENSMUSG00000000088	MOUSE9_60_PE5	HBG047469
ENSMUSG00000031204	MOUSEX_92_PE4	HBG054052
ENSMUSG00000045671	MOUSE11_21_PE1	HBG068701
ENSMUSG00000070870	MOUSE1_67_PE11	HBG040541
ENSMUSG00000025945	MOUSE1_68_PE1	HBG040541
ENSMUSG00000067299	MOUSE1_67_PE13	HBG040541
ENSMUSG00000025952	MOUSE1_67_PE14	HBG040541
ENSMUSG00000044429	MOUSE1_67_PE17	HBG040541
ENSMUSG00000073658	MOUSE1_67_PE16	HBG040541
ENSMUSG00000032382	MOUSE9_69_PE7	HBG018905
ENSMUSG00000028796	MOUSE4_132_PE14	HBG069403
ENSMUSG00000059991	MOUSE5_150_PE8	HBG059441
ENSMUSG00000027674	MOUSE3_35_PE2	HBG038254
ENSMUSG00000030019	MOUSE6_119_PE8	HBG003035
ENSMUSG00000029168	MOUSE5_32_PE22	HBG050587
ENSMUSG00000022048	MOUSE14_67_PE10	HBG050587

## Sheet: FSGD_sing_orth
Ensembl_gene_id	Homolens_gene_id	Homolens_family_id
ENSMUSG00000006517	MOUSE8_128_PE7	HBG000098
ENSMUSG00000037446	MOUSE17_30_PE22	HBG069344
ENSMUSG00000031028	MOUSE7_112_PE24	HBG069344
ENSMUSG00000001521	MOUSE6_128_PE12	HBG069344
ENSMUSG00000023467	MOUSE7_46_PE74	HBG069344
ENSMUSG00000031796	MOUSE8_100_PE15	HBG006174
ENSMUSG00000057290	MOUSE16_23_PE2	HBG076305
ENSMUSG00000068612	MOUSE3_134_PE5	HBG076305
ENSMUSG00000069682	MOUSE10_31_PE1	HBG076305
ENSMUSG00000063442	MOUSE11_86_PE6	HBG076305
ENSMUSG00000063328	MOUSE1_39_PE3	HBG076305
ENSMUSG00000063022	MOUSEX_102_PE7	HBG076305
ENSMUSG00000066983	MOUSE17_74_PE4	HBG076305
ENSMUSG00000017453	MOUSE11_81_PE9	HBG075210
ENSMUSG00000022360	MOUSE15_61_PE5	HBG079277
ENSMUSG00000020631	MOUSE12_6_PE1	HBG079277
ENSMUSG00000045503	MOUSE2_166_PE29	HBG006967
ENSMUSG00000038828	MOUSE5_33_PE1	HBG058651
ENSMUSG00000036091	MOUSE9_112_PE13	HBG037813
ENSMUSG00000029678	MOUSE6_27_PE1	HBG037813
ENSMUSG00000029682	MOUSE6_26_PE12	HBG037813
ENSMUSG00000029679	MOUSE6_26_PE10	HBG037813
ENSMUSG00000029680	MOUSE6_26_PE11	HBG037813
ENSMUSG00000043153	MOUSE12_38_PE7	HBG037461
ENSMUSG00000036572	MOUSEX_35_PE1	HBG089001
ENSMUSG00000021223	MOUSE12_88_PE5	HBG026312
ENSMUSG00000042359	MOUSE2_77_PE9	HBG068272
ENSMUSG00000044252	MOUSE18_14_PE4	HBG068272
ENSMUSG00000024603	MOUSE18_63_PE7	HBG000902
ENSMUSG00000026648	MOUSE2_4_PE10	HBG082554
ENSMUSG00000040767	MOUSE11_33_PE9	HBG022735
ENSMUSG00000022974	MOUSE16_94_PE12	HBG078219
ENSMUSG00000035125	MOUSE6_81_PE1	HBG078219
ENSMUSG00000000295	MOUSE10_32_PE6	HBG038839
ENSMUSG00000033059	MOUSE2_152_PE15	HBG056828
ENSMUSG00000021069	MOUSE12_73_PE17	HBG056828
ENSMUSG00000028295	MOUSE4_36_PE10	HBG003004
ENSMUSG00000021431	MOUSE13_40_PE10	HBG022422
ENSMUSG00000039137	MOUSE4_65_PE8	HBG025429
ENSMUSG00000022568	MOUSE15_79_PE26	HBG020377
ENSMUSG00000025266	MOUSEX_147_PE3	HBG023603
ENSMUSG00000042354	MOUSE14_31_PE13	HBG023603
ENSMUSG00000019578	MOUSE17_58_PE19	HBG030991
ENSMUSG00000028961	MOUSE4_152_PE20	HBG020716
ENSMUSG00000041840	MOUSE18_82_PE1	HBG022506
ENSMUSG00000025978	MOUSE1_57_PE15	HBG023346
ENSMUSG00000030270	MOUSE6_113_PE11	HBG053556
ENSMUSG00000074643	MOUSE2_158_PE9	HBG053556
ENSMUSG00000028228	MOUSE4_20_PE4	HBG053556
ENSMUSG00000034361	MOUSE8_99_PE17	HBG053556
ENSMUSG00000022339	MOUSE15_47_PE6	HBG020253
ENSMUSG00000045201	MOUSE14_15_PE1	HBG021861
ENSMUSG00000050751	MOUSE8_130_PE2	HBG023080
ENSMUSG00000026098	MOUSE1_55_PE13	HBG026079
ENSMUSG00000039004	MOUSE13_40_PE11	HBG060060
ENSMUSG00000002384	MOUSE4_126_PE11	HBG060060
ENSMUSG00000032726	MOUSE4_126_PE21	HBG060060
ENSMUSG00000021835	MOUSE14_46_PE6	HBG060060
ENSMUSG00000051279	MOUSE4_10_PE12	HBG060060
ENSMUSG00000038259	MOUSE2_157_PE27	HBG060060
ENSMUSG00000072625	MOUSE14_34_PE2	HBG060060
ENSMUSG00000039239	MOUSE1_192_PE3	HBG060060
ENSMUSG00000016327	MOUSEX_36_PE1	HBG049249
ENSMUSG00000031029	MOUSE7_112_PE22	HBG010106
ENSMUSG00000019494	MOUSE5_143_PE49	HBG010106
ENSMUSG00000037475	MOUSEX_39_PE5	HBG003933
ENSMUSG00000048363	MOUSE5_108_PE7	HBG003933
ENSMUSG00000020807	MOUSE11_75_PE5	HBG021365
ENSMUSG00000018322	MOUSE2_166_PE9	HBG020282
ENSMUSG00000029221	MOUSE5_70_PE1	HBG000035
ENSMUSG00000034848	MOUSE2_66_PE12	HBG027289
ENSMUSG00000052707	MOUSE7_127_PE1	HBG058775
ENSMUSG00000030498	MOUSE7_54_PE1	HBG023109
ENSMUSG00000033055	MOUSE15_82_PE27	HBG076557
ENSMUSG00000029279	MOUSE5_111_PE2	HBG095071
ENSMUSG00000067829	MOUSEX_60_PE3	HBG003078
ENSMUSG00000023949	MOUSE17_47_PE11	HBG022328
ENSMUSG00000008200	MOUSE2_92_PE1	HBG058314
ENSMUSG00000035247	MOUSE12_54_PE1	HBG002638
ENSMUSG00000020074	MOUSE10_65_PE3	HBG025323
ENSMUSG00000022708	MOUSE16_46_PE1	HBG037683
ENSMUSG00000032415	MOUSE9_90_PE1	HBG025484
ENSMUSG00000039285	MOUSE9_122_PE4	HBG057962
ENSMUSG00000024208	MOUSE17_29_PE3	HBG069260
ENSMUSG00000040370	MOUSE6_146_PE4	HBG045717
ENSMUSG00000020955	MOUSE12_53_PE8	HBG058462
ENSMUSG00000063801	MOUSE7_82_PE24	HBG058462
ENSMUSG00000074154	MOUSE8_99_PE13	HBG058462
ENSMUSG00000027552	MOUSE3_15_PE6	HBG067552
ENSMUSG00000014859	MOUSE8_110_PE15	HBG067552
ENSMUSG00000018983	MOUSE4_139_PE33	HBG067552
ENSMUSG00000020447	MOUSE11_7_PE3	HBG005283
ENSMUSG00000013593	MOUSE1_177_PE22	HBG044536
ENSMUSG00000039199	MOUSE8_110_PE29	HBG044944
ENSMUSG00000021482	MOUSE13_67_PE9	HBG047384
ENSMUSG00000028104	MOUSE3_99_PE43	HBG038341
ENSMUSG00000035834	MOUSE13_85_PE4	HBG038341
ENSMUSG00000033458	MOUSE7_66_PE11	HBG026121
ENSMUSG00000041124	MOUSE9_5_PE4	HBG022798
ENSMUSG00000039568	MOUSE16_5_PE21	HBG072601
ENSMUSG00000021400	MOUSE13_35_PE1	HBG060874
ENSMUSG00000028048	MOUSE3_92_PE20	HBG073041
ENSMUSG00000040356	MOUSE17_37_PE8	HBG007489
ENSMUSG00000026281	MOUSE1_98_PE10	HBG002802
ENSMUSG00000030177	MOUSE6_120_PE15	HBG023720
ENSMUSG00000006304	MOUSE1_76_PE6	HBG044469
ENSMUSG00000005982	MOUSE16_4_PE12	HBG005809
ENSMUSG00000031657	MOUSE8_93_PE5	HBG021075
ENSMUSG00000036777	MOUSE9_23_PE36	HBG045229
ENSMUSG00000052214	MOUSE7_19_PE31	HBG065739
ENSMUSG00000030682	MOUSE7_131_PE11	HBG013475
ENSMUSG00000028743	MOUSE4_143_PE13	HBG023390
ENSMUSG00000039879	MOUSE10_19_PE2	HBG026369
ENSMUSG00000031826	MOUSE8_125_PE23	HBG047887
ENSMUSG00000034235	MOUSE14_20_PE24	HBG038397
ENSMUSG00000055401	MOUSE4_151_PE31	HBG058772
ENSMUSG00000029001	MOUSE4_151_PE32	HBG058772
ENSMUSG00000047586	MOUSE7_29_PE30	HBG058772
ENSMUSG00000024065	MOUSE17_77_PE2	HBG040359
ENSMUSG00000027293	MOUSE2_121_PE25	HBG040359
ENSMUSG00000047879	MOUSE18_11_PE2	HBG009595
ENSMUSG00000026615	MOUSE1_191_PE6	HBG031768
ENSMUSG00000028329	MOUSE4_47_PE14	HBG006721
ENSMUSG00000037103	MOUSE8_88_PE35	HBG024916
ENSMUSG00000015189	MOUSE6_5_PE3	HBG057517
ENSMUSG00000002043	MOUSE7_19_PE47	HBG052249
ENSMUSG00000025607	MOUSE6_32_PE19	HBG056357
ENSMUSG00000018733	MOUSE11_86_PE15	HBG059582
ENSMUSG00000025495	MOUSE7_145_PE38	HBG023219
ENSMUSG00000029642	MOUSE5_153_PE2	HBG039167
ENSMUSG00000039682	MOUSE5_48_PE3	HBG002149
ENSMUSG00000021575	MOUSE13_77_PE21	HBG058465
ENSMUSG00000028467	MOUSE4_45_PE6	HBG044296
ENSMUSG00000001424	MOUSE6_30_PE8	HBG024673
ENSMUSG00000028069	MOUSE3_91_PE15	HBG057176
ENSMUSG00000062031	MOUSE7_145_PE27	HBG081899
ENSMUSG00000051331	MOUSE6_119_PE2	HBG023678
ENSMUSG00000026430	MOUSE1_136_PE4	HBG069343
ENSMUSG00000003848	MOUSE8_112_PE18	HBG001178
ENSMUSG00000047490	MOUSE11_92_PE15	HBG021468
ENSMUSG00000038768	MOUSE1_187_PE10	HBG005066
ENSMUSG00000038633	MOUSE1_188_PE9	HBG005066
ENSMUSG00000040624	MOUSE10_7_PE9	HBG025576
ENSMUSG00000029229	MOUSE5_78_PE5	HBG047161
ENSMUSG00000031327	MOUSEX_100_PE11	HBG047161
ENSMUSG00000038503	MOUSE7_86_PE11	HBG068162
ENSMUSG00000020571	MOUSE12_18_PE6	HBG004247
ENSMUSG00000072978	MOUSE5_45_PE1	HBG006512
ENSMUSG00000074588	MOUSE3_63_PE4	HBG006512
ENSMUSG00000027694	MOUSE2_170_PE1	HBG006512
ENSMUSG00000046892	MOUSE3_9_PE5	HBG006512
ENSMUSG00000019755	MOUSE2_170_PE2	HBG006512
ENSMUSG00000040472	MOUSE14_56_PE33	HBG055707
ENSMUSG00000025224	MOUSE19_47_PE26	HBG003999
ENSMUSG00000039361	MOUSE7_93_PE10	HBG026002
ENSMUSG00000022394	MOUSE15_85_PE6	HBG067766
ENSMUSG00000061186	MOUSE2_11_PE6	HBG067766
ENSMUSG00000026608	MOUSE1_195_PE1	HBG046844
ENSMUSG00000003759	MOUSE7_28_PE11	HBG046844
ENSMUSG00000028608	MOUSE4_110_PE28	HBG078346
ENSMUSG00000033554	MOUSE3_119_PE4	HBG025661
ENSMUSG00000026584	MOUSE1_170_PE1	HBG020698
ENSMUSG00000034329	MOUSE11_89_PE1	HBG015242
ENSMUSG00000020962	MOUSE12_95_PE7	HBG019582
ENSMUSG00000028692	MOUSE4_119_PE33	HBG014402
ENSMUSG00000031671	MOUSE8_100_PE26	HBG060192
ENSMUSG00000068350	MOUSE16_34_PE18	HBG060192
ENSMUSG00000058979	MOUSE6_120_PE19	HBG013130
ENSMUSG00000030225	MOUSE6_138_PE7	HBG021180
ENSMUSG00000025010	MOUSE19_42_PE8	HBG020067
ENSMUSG00000044707	MOUSE11_45_PE9	HBG020067
ENSMUSG00000046828	MOUSE1_46_PE14	HBG037299
ENSMUSG00000025956	MOUSE1_66_PE14	HBG037299
ENSMUSG00000049882	MOUSE12_73_PE2	HBG037299
ENSMUSG00000032288	MOUSE9_59_PE6	HBG000905
ENSMUSG00000027185	MOUSE2_105_PE2	HBG050677
ENSMUSG00000024953	MOUSE19_8_PE2	HBG002222
ENSMUSG00000042895	MOUSE15_44_PE4	HBG020406
ENSMUSG00000015149	MOUSE7_29_PE39	HBG012311
ENSMUSG00000025486	MOUSE7_145_PE22	HBG012311
ENSMUSG00000029524	MOUSE5_119_PE30	HBG012311
ENSMUSG00000067291	MOUSE5_58_PE1	HBG053303
ENSMUSG00000042167	MOUSE13_97_PE15	HBG053303
ENSMUSG00000038785	MOUSE8_38_PE2	HBG059288
ENSMUSG00000027104	MOUSE2_74_PE16	HBG023265
ENSMUSG00000009614	MOUSE2_28_PE17	HBG057919
ENSMUSG00000042102	MOUSE13_98_PE8	HBG057919
ENSMUSG00000047839	MOUSE1_68_PE5	HBG060950
ENSMUSG00000028737	MOUSE4_143_PE23	HBG001020
ENSMUSG00000029468	MOUSE5_126_PE27	HBG072725
ENSMUSG00000020787	MOUSE11_76_PE5	HBG072725
ENSMUSG00000029503	MOUSE5_114_PE15	HBG072725
ENSMUSG00000023110	MOUSE14_55_PE12	HBG002554
ENSMUSG00000025609	MOUSE6_33_PE3	HBG006838
ENSMUSG00000028988	MOUSE4_153_PE6	HBG020711
ENSMUSG00000002981	MOUSE7_20_PE1	HBG001833
ENSMUSG00000061808	MOUSE18_22_PE5	HBG029911
ENSMUSG00000007646	MOUSE11_90_PE11	HBG024344
ENSMUSG00000071335	MOUSE10_41_PE8	HBG048872
ENSMUSG00000039339	MOUSE10_41_PE7	HBG048872
ENSMUSG00000038522	MOUSE10_41_PE11	HBG048872
ENSMUSG00000035133	MOUSE12_54_PE12	HBG003599
ENSMUSG00000046679	MOUSE6_85_PE26	HBG019140
ENSMUSG00000002014	MOUSEX_71_PE32	HBG039326
ENSMUSG00000026839	MOUSE2_59_PE5	HBG052008
ENSMUSG00000020407	MOUSE11_10_PE4	HBG052008
ENSMUSG00000001785	MOUSE10_89_PE1	HBG018865
ENSMUSG00000030268	MOUSE6_145_PE3	HBG002769
ENSMUSG00000030826	MOUSE7_46_PE81	HBG002769
ENSMUSG00000031938	MOUSE9_16_PE10	HBG058245
ENSMUSG00000024219	MOUSE17_30_PE4	HBG022279
ENSMUSG00000058589	MOUSE10_93_PE7	HBG022279
ENSMUSG00000028684	MOUSE4_120_PE13	HBG019257
ENSMUSG00000029617	MOUSE5_149_PE28	HBG004122
ENSMUSG00000020622	MOUSE12_11_PE2	HBG024840
ENSMUSG00000041360	MOUSE19_28_PE4	HBG025272
ENSMUSG00000027242	MOUSE2_123_PE18	HBG051045
ENSMUSG00000020289	MOUSE11_33_PE13	HBG002250
ENSMUSG00000028886	MOUSE4_136_PE15	HBG022740
ENSMUSG00000025932	MOUSE1_15_PE6	HBG022740
ENSMUSG00000017897	MOUSE2_168_PE1	HBG022740
ENSMUSG00000057367	MOUSE9_8_PE17	HBG047889
ENSMUSG00000032000	MOUSE9_8_PE19	HBG047889
ENSMUSG00000025860	MOUSEX_39_PE12	HBG047889
ENSMUSG00000038840	MOUSE2_183_PE29	HBG047889
ENSMUSG00000046562	MOUSE5_119_PE14	HBG003862
ENSMUSG00000070494	MOUSE2_176_PE7	HBG080274
ENSMUSG00000022297	MOUSE15_41_PE1	HBG072021
ENSMUSG00000045005	MOUSE1_67_PE3	HBG072021
ENSMUSG00000058443	MOUSE9_52_PE5	HBG020806
ENSMUSG00000008682	MOUSE2_138_PE5	HBG020806
ENSMUSG00000074986	MOUSE2_106_PE21	HBG020806
ENSMUSG00000059804	MOUSEX_65_PE1	HBG020806
ENSMUSG00000060879	MOUSE12_69_PE1	HBG020806
ENSMUSG00000057626	MOUSE9_110_PE1	HBG020806
ENSMUSG00000074108	MOUSE8_111_PE29	HBG020806
ENSMUSG00000026096	MOUSE1_55_PE15	HBG034038
ENSMUSG00000061119	MOUSE7_96_PE9	HBG026598
ENSMUSG00000026958	MOUSE2_26_PE30	HBG026598
ENSMUSG00000036306	MOUSE8_73_PE8	HBG022825
ENSMUSG00000001053	MOUSE11_54_PE7	HBG022825
ENSMUSG00000054302	MOUSE12_57_PE5	HBG026549
ENSMUSG00000058217	MOUSE7_28_PE4	HBG020302
ENSMUSG00000026975	MOUSE2_26_PE3	HBG021930
ENSMUSG00000033762	MOUSE15_80_PE21	HBG082636
ENSMUSG00000044156	MOUSE6_4_PE4	HBG023676
ENSMUSG00000027809	MOUSE3_82_PE6	HBG002526
ENSMUSG00000033770	MOUSE4_145_PE19	HBG001394
ENSMUSG00000006216	MOUSE4_145_PE20	HBG001394
ENSMUSG00000000384	MOUSE11_7_PE26	HBG057178
ENSMUSG00000028555	MOUSE4_112_PE8	HBG000273
ENSMUSG00000035161	MOUSE14_63_PE7	HBG043071
ENSMUSG00000035967	MOUSEX_54_PE5	HBG043071
ENSMUSG00000037991	MOUSE16_11_PE24	HBG022573
ENSMUSG00000073015	MOUSEX_102_PE4	HBG022573
ENSMUSG00000026484	MOUSE1_156_PE6	HBG012296
ENSMUSG00000075012	MOUSE2_103_PE7	HBG020581
ENSMUSG00000003235	MOUSE16_21_PE14	HBG001176
ENSMUSG00000042492	MOUSE7_131_PE23	HBG050057
ENSMUSG00000040247	MOUSE19_5_PE22	HBG050057
ENSMUSG00000074864	MOUSE13_65_PE4	HBG023752
ENSMUSG00000074868	MOUSE13_64_PE4	HBG023752
ENSMUSG00000027942	MOUSE3_93_PE12	HBG023752
ENSMUSG00000050574	MOUSE5_148_PE15	HBG001517
ENSMUSG00000028261	MOUSE4_26_PE2	HBG000853
ENSMUSG00000043754	MOUSE7_120_PE5	HBG037468
ENSMUSG00000048122	MOUSE19_61_PE8	HBG037468
ENSMUSG00000071644	MOUSE19_10_PE13	HBG037468
ENSMUSG00000027702	MOUSE3_32_PE7	HBG021771
ENSMUSG00000035047	MOUSE9_22_PE24	HBG003534
ENSMUSG00000026480	MOUSE1_157_PE9	HBG040612
ENSMUSG00000036469	MOUSE8_70_PE2	HBG052867
ENSMUSG00000018287	MOUSE11_73_PE79	HBG038442
ENSMUSG00000051483	MOUSE16_97_PE2	HBG067630
ENSMUSG00000022947	MOUSE16_97_PE3	HBG067630
ENSMUSG00000032219	MOUSE9_75_PE12	HBG050679
ENSMUSG00000000182	MOUSE6_127_PE11	HBG059953
ENSMUSG00000030282	MOUSE6_143_PE16	HBG024516
ENSMUSG00000024544	MOUSE18_71_PE7	HBG057213
ENSMUSG00000038400	MOUSE2_175_PE12	HBG057213
ENSMUSG00000024474	MOUSE18_38_PE22	HBG004006
ENSMUSG00000013465	MOUSE2_26_PE13	HBG048194
ENSMUSG00000028391	MOUSE4_64_PE9	HBG025387
ENSMUSG00000048058	MOUSE2_103_PE4	HBG037627
ENSMUSG00000033579	MOUSE8_116_PE21	HBG048145
ENSMUSG00000032841	MOUSE2_103_PE2	HBG071199
ENSMUSG00000002825	MOUSE9_22_PE30	HBG007665
ENSMUSG00000050357	MOUSE8_110_PE35	HBG019405
ENSMUSG00000046032	MOUSEX_98_PE5	HBG019877
ENSMUSG00000019804	MOUSE10_44_PE2	HBG019877
ENSMUSG00000041736	MOUSE15_87_PE7	HBG067955
ENSMUSG00000040452	MOUSE15_22_PE1	HBG069674
ENSMUSG00000040420	MOUSE15_24_PE1	HBG069674
ENSMUSG00000031871	MOUSE8_109_PE1	HBG069674
ENSMUSG00000031962	MOUSE8_128_PE27	HBG069674
ENSMUSG00000044322	MOUSE18_21_PE4	HBG069674
ENSMUSG00000059898	MOUSE18_21_PE1	HBG069674
ENSMUSG00000024331	MOUSE18_21_PE3	HBG069674
ENSMUSG00000039155	MOUSE2_181_PE6	HBG069674
ENSMUSG00000053936	MOUSE15_24_PE2	HBG069674
ENSMUSG00000024150	MOUSE17_91_PE6	HBG056744
ENSMUSG00000030879	MOUSE7_109_PE31	HBG032518
ENSMUSG00000020135	MOUSE10_83_PE33	HBG025041
ENSMUSG00000024999	MOUSE19_40_PE2	HBG034886
ENSMUSG00000028898	MOUSE4_136_PE4	HBG046216
ENSMUSG00000029598	MOUSE5_124_PE7	HBG026818
ENSMUSG00000033208	MOUSE10_79_PE16	HBG074798
ENSMUSG00000022372	MOUSE15_69_PE9	HBG020221
ENSMUSG00000061311	MOUSE2_102_PE4	HBG020586
ENSMUSG00000063760	MOUSE10_32_PE9	HBG037778
ENSMUSG00000026019	MOUSE1_62_PE8	HBG000731
ENSMUSG00000048261	MOUSE7_13_PE15	HBG000731
ENSMUSG00000002307	MOUSE17_36_PE8	HBG070932
ENSMUSG00000025733	MOUSE17_27_PE42	HBG032447
ENSMUSG00000036915	MOUSE7_31_PE35	HBG024028
ENSMUSG00000030754	MOUSE7_118_PE1	HBG000426
ENSMUSG00000027420	MOUSE2_145_PE2	HBG020136
ENSMUSG00000026377	MOUSE1_123_PE2	HBG050081
ENSMUSG00000030588	MOUSE7_30_PE17	HBG033429
ENSMUSG00000024875	MOUSE19_6_PE7	HBG033429
ENSMUSG00000031534	MOUSE8_24_PE15	HBG059954
ENSMUSG00000031196	MOUSEX_73_PE8	HBG059281
ENSMUSG00000026579	MOUSE1_170_PE9	HBG059281
ENSMUSG00000028687	MOUSE4_120_PE8	HBG023968
ENSMUSG00000038379	MOUSE9_87_PE7	HBG057214
ENSMUSG00000071054	MOUSE17_59_PE14	HBG024963
ENSMUSG00000042625	MOUSE17_59_PE12	HBG024963
ENSMUSG00000031601	MOUSE8_43_PE1	HBG060988
ENSMUSG00000020515	MOUSE11_60_PE8	HBG060988
ENSMUSG00000021621	MOUSE13_95_PE10	HBG045013
ENSMUSG00000057530	MOUSE4_141_PE18	HBG024267
ENSMUSG00000057457	MOUSEX_153_PE2	HBG024267
ENSMUSG00000058183	MOUSE4_158_PE9	HBG024267
ENSMUSG00000026247	MOUSE1_91_PE6	HBG024267
ENSMUSG00000022857	MOUSE16_82_PE3	HBG025855
ENSMUSG00000032295	MOUSE9_59_PE13	HBG056322
ENSMUSG00000031731	MOUSE8_115_PE5	HBG026532
ENSMUSG00000040701	MOUSE14_55_PE45	HBG026532
ENSMUSG00000026841	MOUSE2_33_PE4	HBG019870
ENSMUSG00000055553	MOUSE8_75_PE8	HBG081758
ENSMUSG00000039652	MOUSE19_38_PE6	HBG064054
ENSMUSG00000039782	MOUSE5_45_PE3	HBG064054
ENSMUSG00000044542	MOUSE11_53_PE10	HBG056743
ENSMUSG00000050945	MOUSE18_6_PE3	HBG026153
ENSMUSG00000028990	MOUSE4_153_PE5	HBG038494
ENSMUSG00000035367	MOUSE13_61_PE2	HBG059196
ENSMUSG00000042251	MOUSE1_136_PE20	HBG038333
ENSMUSG00000006134	MOUSE16_18_PE25	HBG020988
ENSMUSG00000017776	MOUSE11_78_PE41	HBG020988
ENSMUSG00000044950	MOUSE11_45_PE13	HBG068117
ENSMUSG00000060260	MOUSE7_143_PE8	HBG068117
ENSMUSG00000021951	MOUSE14_58_PE8	HBG004232
ENSMUSG00000052033	MOUSE2_173_PE3	HBG004595
ENSMUSG00000028017	MOUSE3_133_PE7	HBG038217
ENSMUSG00000024277	MOUSE18_25_PE5	HBG034270
ENSMUSG00000044442	MOUSE16_90_PE1	HBG003239
ENSMUSG00000031253	MOUSEX_130_PE4	HBG026077
ENSMUSG00000055629	MOUSE7_145_PE33	HBG059063
ENSMUSG00000031562	MOUSE8_50_PE10	HBG010108
ENSMUSG00000034462	MOUSE5_108_PE6	HBG030418
ENSMUSG00000037578	MOUSE19_45_PE17	HBG030418
ENSMUSG00000036529	MOUSE15_93_PE3	HBG058623
ENSMUSG00000035637	MOUSE4_46_PE5	HBG060718
ENSMUSG00000061352	MOUSE1_36_PE8	HBG060718
ENSMUSG00000061495	MOUSEX_39_PE1	HBG060718
ENSMUSG00000053398	MOUSE3_101_PE11	HBG060718
ENSMUSG00000009487	MOUSE7_47_PE41	HBG037861
ENSMUSG00000044894	MOUSE11_55_PE7	HBG000828
ENSMUSG00000042303	MOUSE15_84_PE8	HBG005304
ENSMUSG00000015340	MOUSEX_9_PE14	HBG046022
ENSMUSG00000031257	MOUSEX_130_PE7	HBG046022
ENSMUSG00000048279	MOUSE14_62_PE4	HBG019985
ENSMUSG00000070284	MOUSE9_112_PE39	HBG018410
ENSMUSG00000017405	MOUSE11_81_PE30	HBG055817
ENSMUSG00000034290	MOUSE12_89_PE23	HBG055817
ENSMUSG00000042353	MOUSE8_85_PE3	HBG061539
ENSMUSG00000047735	MOUSE6_4_PE3	HBG056570
ENSMUSG00000021611	MOUSE13_77_PE3	HBG057497
ENSMUSG00000031595	MOUSE8_43_PE12	HBG077620
ENSMUSG00000028211	MOUSE4_12_PE4	HBG069440
ENSMUSG00000023094	MOUSE2_20_PE4	HBG022747
ENSMUSG00000029104	MOUSE5_37_PE7	HBG049008
ENSMUSG00000021243	MOUSE12_89_PE8	HBG002636
ENSMUSG00000028175	MOUSE3_164_PE1	HBG026238
ENSMUSG00000023961	MOUSE17_46_PE6	HBG021545
ENSMUSG00000023960	MOUSE17_46_PE4	HBG021545
ENSMUSG00000038173	MOUSE8_49_PE7	HBG021545
ENSMUSG00000039057	MOUSE8_11_PE3	HBG023671
ENSMUSG00000026708	MOUSE1_166_PE14	HBG020764
ENSMUSG00000042046	MOUSE1_137_PE7	HBG012073
ENSMUSG00000026021	MOUSE1_62_PE3	HBG082250
ENSMUSG00000069124	MOUSE3_4_PE3	HBG082250
ENSMUSG00000027680	MOUSE3_36_PE3	HBG021322
ENSMUSG00000018765	MOUSE11_72_PE53	HBG021322
ENSMUSG00000000838	MOUSEX_66_PE3	HBG021322
ENSMUSG00000006221	MOUSE4_145_PE21	HBG038149
ENSMUSG00000022553	MOUSE15_79_PE54	HBG031670
ENSMUSG00000036087	MOUSE5_76_PE4	HBG087369
ENSMUSG00000024382	MOUSE18_34_PE9	HBG008918
ENSMUSG00000033392	MOUSE9_118_PE4	HBG000861
ENSMUSG00000029715	MOUSE5_143_PE10	HBG022687
ENSMUSG00000018405	MOUSE11_87_PE13	HBG060027
ENSMUSG00000036613	MOUSE12_30_PE8	HBG001957
ENSMUSG00000028483	MOUSE4_85_PE5	HBG052097
ENSMUSG00000023336	MOUSE8_125_PE15	HBG021035
ENSMUSG00000029326	MOUSE5_103_PE8	HBG038198
ENSMUSG00000032468	MOUSE9_103_PE6	HBG021826
ENSMUSG00000019359	MOUSEX_97_PE12	HBG044903
ENSMUSG00000027612	MOUSE2_157_PE21	HBG059604
ENSMUSG00000031740	MOUSE8_97_PE4	HBG059604
ENSMUSG00000017737	MOUSE2_167_PE21	HBG059604
ENSMUSG00000050578	MOUSE9_8_PE3	HBG059604
ENSMUSG00000018620	MOUSE9_8_PE12	HBG059604
ENSMUSG00000020682	MOUSE11_86_PE20	HBG059604
ENSMUSG00000035206	MOUSE10_83_PE82	HBG024987
ENSMUSG00000026594	MOUSE1_162_PE2	HBG019845
ENSMUSG00000038831	MOUSE2_34_PE20	HBG019845
ENSMUSG00000003380	MOUSE7_25_PE53	HBG007686
ENSMUSG00000046553	MOUSE1_93_PE2	HBG019341
ENSMUSG00000034105	MOUSE8_125_PE19	HBG019341
ENSMUSG00000042042	MOUSE6_118_PE11	HBG046694
ENSMUSG00000042650	MOUSE11_63_PE1	HBG047773
ENSMUSG00000021273	MOUSE14_64_PE2	HBG025364
ENSMUSG00000035129	MOUSE14_18_PE6	HBG025364
ENSMUSG00000012483	MOUSE6_9_PE4	HBG024283
ENSMUSG00000046334	MOUSE1_10_PE10	HBG024283
ENSMUSG00000033499	MOUSE13_10_PE1	HBG085564
ENSMUSG00000029416	MOUSE5_132_PE2	HBG059172
ENSMUSG00000046794	MOUSE8_37_PE6	HBG071969
ENSMUSG00000033427	MOUSE10_78_PE10	HBG010019
ENSMUSG00000028603	MOUSE4_111_PE5	HBG004827
ENSMUSG00000038302	MOUSE10_44_PE1	HBG005215
ENSMUSG00000030583	MOUSE7_30_PE24	HBG089046
ENSMUSG00000000301	MOUSE11_62_PE18	HBG059390
ENSMUSG00000003421	MOUSE7_46_PE34	HBG055031
ENSMUSG00000026457	MOUSE1_139_PE12	HBG047591
ENSMUSG00000030168	MOUSE6_119_PE6	HBG047591
ENSMUSG00000055725	MOUSE5_100_PE4	HBG047591
ENSMUSG00000048772	MOUSE4_120_PE27	HBG063638
ENSMUSG00000020974	MOUSE12_72_PE9	HBG004903
ENSMUSG00000031387	MOUSEX_71_PE42	HBG025186
ENSMUSG00000059439	MOUSE11_88_PE9	HBG025621
ENSMUSG00000033540	MOUSE5_112_PE21	HBG000319
ENSMUSG00000033837	MOUSE15_80_PE16	HBG056652
ENSMUSG00000036748	MOUSE19_47_PE32	HBG008260
ENSMUSG00000062580	MOUSE1_140_PE5	HBG004207
ENSMUSG00000031158	MOUSEX_8_PE9	HBG004207
ENSMUSG00000036339	MOUSE14_49_PE1	HBG038643
ENSMUSG00000031667	MOUSE8_96_PE2	HBG063288
ENSMUSG00000022561	MOUSE15_79_PE50	HBG003881
ENSMUSG00000045994	MOUSE9_28_PE2	HBG059678
ENSMUSG00000057572	MOUSE4_133_PE17	HBG073544
ENSMUSG00000065990	MOUSE4_159_PE25	HBG020751
ENSMUSG00000020716	MOUSE11_82_PE10	HBG003092
ENSMUSG00000039164	MOUSE2_33_PE29	HBG019839
ENSMUSG00000053626	MOUSE8_68_PE2	HBG025318
ENSMUSG00000021892	MOUSE14_31_PE37	HBG083095
ENSMUSG00000034278	MOUSE2_120_PE26	HBG001716
ENSMUSG00000036352	MOUSE2_27_PE3	HBG045849
ENSMUSG00000072775	MOUSE6_124_PE11	HBG045849
ENSMUSG00000029322	MOUSE5_104_PE8	HBG070480
ENSMUSG00000022515	MOUSE16_5_PE26	HBG022772
ENSMUSG00000020679	MOUSE11_86_PE36	HBG038695
ENSMUSG00000029556	MOUSE5_119_PE8	HBG038695
ENSMUSG00000022663	MOUSE16_47_PE18	HBG001649
ENSMUSG00000046947	MOUSE6_41_PE13	HBG027173
ENSMUSG00000016505	MOUSE8_39_PE8	HBG067721
ENSMUSG00000020402	MOUSE11_54_PE28	HBG067721
ENSMUSG00000070958	MOUSE1_33_PE6	HBG067721
ENSMUSG00000021786	MOUSE14_16_PE2	HBG038921
ENSMUSG00000041737	MOUSE9_33_PE13	HBG021738
ENSMUSG00000029994	MOUSE6_86_PE5	HBG057015
ENSMUSG00000018340	MOUSE11_57_PE12	HBG057015
ENSMUSG00000015702	MOUSE3_98_PE32	HBG057015
ENSMUSG00000013622	MOUSE5_33_PE16	HBG049275
ENSMUSG00000056832	MOUSE6_40_PE11	HBG006927
ENSMUSG00000037326	MOUSE17_27_PE59	HBG038582
ENSMUSG00000050379	MOUSEX_34_PE15	HBG068544
ENSMUSG00000034219	MOUSE5_134_PE13	HBG068544
ENSMUSG00000019917	MOUSE10_61_PE3	HBG068544
ENSMUSG00000026276	MOUSE1_98_PE3	HBG068544
ENSMUSG00000022456	MOUSE15_85_PE41	HBG068544
ENSMUSG00000022542	MOUSE16_5_PE29	HBG068544
ENSMUSG00000037847	MOUSE19_19_PE3	HBG025296
ENSMUSG00000038822	MOUSE10_47_PE6	HBG025531
ENSMUSG00000039000	MOUSE5_31_PE8	HBG008606
ENSMUSG00000056131	MOUSE9_90_PE6	HBG004661
ENSMUSG00000031792	MOUSE8_100_PE13	HBG066276
ENSMUSG00000029992	MOUSE6_86_PE11	HBG003886
ENSMUSG00000020363	MOUSE11_52_PE5	HBG003886
ENSMUSG00000007415	MOUSE5_4_PE11	HBG078288
ENSMUSG00000032309	MOUSE9_57_PE19	HBG022003
ENSMUSG00000026047	MOUSE1_46_PE9	HBG004358
ENSMUSG00000034487	MOUSE9_55_PE7	HBG004358
ENSMUSG00000036764	MOUSE10_65_PE27	HBG002172
ENSMUSG00000044345	MOUSE19_43_PE23	HBG022810
ENSMUSG00000020283	MOUSE11_25_PE3	HBG053432
ENSMUSG00000062508	MOUSE19_7_PE17	HBG000180
ENSMUSG00000030842	MOUSE7_105_PE21	HBG000180
ENSMUSG00000032624	MOUSE17_87_PE2	HBG060917
ENSMUSG00000071647	MOUSE19_10_PE9	HBG060917
ENSMUSG00000040811	MOUSE7_19_PE29	HBG060917
ENSMUSG00000042961	MOUSE15_8_PE4	HBG021905
ENSMUSG00000035946	MOUSE5_78_PE6	HBG059568
ENSMUSG00000053129	MOUSE5_153_PE3	HBG059568
ENSMUSG00000023266	MOUSE17_49_PE25	HBG022314
ENSMUSG00000022805	MOUSE16_40_PE7	HBG021660
ENSMUSG00000047248	MOUSE7_104_PE3	HBG020565
ENSMUSG00000031600	MOUSE8_43_PE3	HBG002087
ENSMUSG00000038121	MOUSE18_71_PE9	HBG041874
ENSMUSG00000027778	MOUSE3_71_PE6	HBG038259
ENSMUSG00000058816	MOUSE19_31_PE8	HBG002437
ENSMUSG00000068090	MOUSE17_7_PE10	HBG002437
ENSMUSG00000072894	MOUSE6_90_PE16	HBG002437
ENSMUSG00000047714	MOUSE16_33_PE4	HBG002437
ENSMUSG00000052025	MOUSEX_23_PE2	HBG002437
ENSMUSG00000045217	MOUSEX_15_PE1	HBG002437
ENSMUSG00000027832	MOUSE3_68_PE8	HBG021795
ENSMUSG00000031918	MOUSE9_14_PE4	HBG022934
ENSMUSG00000031337	MOUSEX_69_PE5	HBG022934
ENSMUSG00000021987	MOUSE14_61_PE2	HBG022934
ENSMUSG00000035078	MOUSE14_64_PE11	HBG022934
ENSMUSG00000021038	MOUSE12_91_PE15	HBG019568
ENSMUSG00000031575	MOUSE8_28_PE14	HBG007708
ENSMUSG00000070360	MOUSE3_117_PE2	HBG086639
ENSMUSG00000074265	MOUSE3_117_PE1	HBG086639
ENSMUSG00000074266	MOUSE3_116_PE6	HBG086639
ENSMUSG00000074267	MOUSE3_116_PE5	HBG086639
ENSMUSG00000074268	MOUSE3_116_PE4	HBG086639
ENSMUSG00000074264	MOUSE3_117_PE3	HBG086639
ENSMUSG00000032463	MOUSE9_102_PE12	HBG021821
ENSMUSG00000024235	MOUSE18_5_PE2	HBG077853
ENSMUSG00000020628	MOUSE12_30_PE7	HBG049884
ENSMUSG00000050323	MOUSE4_12_PE2	HBG003488
ENSMUSG00000025971	MOUSE1_60_PE4	HBG038301
ENSMUSG00000031073	MOUSE7_149_PE12	HBG023198
ENSMUSG00000032370	MOUSE9_70_PE4	HBG030278
ENSMUSG00000028889	MOUSE4_128_PE10	HBG046584
ENSMUSG00000072143	MOUSE4_44_PE5	HBG083798
ENSMUSG00000071005	MOUSE4_44_PE11	HBG083798
ENSMUSG00000004814	MOUSE5_141_PE5	HBG083798
ENSMUSG00000014496	MOUSE14_32_PE1	HBG076600
ENSMUSG00000052331	MOUSE1_57_PE4	HBG076600
ENSMUSG00000066510	MOUSE9_68_PE21	HBG076600
ENSMUSG00000001962	MOUSEX_72_PE17	HBG068460
ENSMUSG00000038246	MOUSE13_36_PE17	HBG068460
ENSMUSG00000012848	MOUSE7_13_PE1	HBG009162
ENSMUSG00000026617	MOUSE1_191_PE5	HBG077040
ENSMUSG00000034607	MOUSEX_109_PE7	HBG057922
ENSMUSG00000066607	MOUSE9_61_PE2	HBG019397
ENSMUSG00000049091	MOUSE7_131_PE30	HBG079004
ENSMUSG00000034212	MOUSE1_97_PE16	HBG026276
ENSMUSG00000020607	MOUSE12_15_PE1	HBG087657
ENSMUSG00000009207	MOUSE2_75_PE2	HBG036724
ENSMUSG00000045302	MOUSE5_33_PE11	HBG057226
ENSMUSG00000031378	MOUSEX_71_PE28	HBG044661
ENSMUSG00000028127	MOUSE3_125_PE7	HBG044661
ENSMUSG00000021240	MOUSE12_88_PE34	HBG044661
ENSMUSG00000058706	MOUSE6_71_PE12	HBG019727
ENSMUSG00000071652	MOUSE19_10_PE4	HBG023149
ENSMUSG00000070613	MOUSE4_148_PE18	HBG023149
ENSMUSG00000027985	MOUSE3_135_PE1	HBG049427
ENSMUSG00000028578	MOUSE4_96_PE2	HBG025249
ENSMUSG00000037705	MOUSE9_44_PE4	HBG020517
ENSMUSG00000015944	MOUSE5_139_PE1	HBG020965
ENSMUSG00000020424	MOUSE11_5_PE9	HBG020965
ENSMUSG00000019792	MOUSE10_31_PE4	HBG000007
ENSMUSG00000027506	MOUSE3_9_PE10	HBG053212
ENSMUSG00000000827	MOUSE2_184_PE27	HBG053212
ENSMUSG00000024815	MOUSE19_31_PE3	HBG053212
ENSMUSG00000075312	MOUSE2_69_PE2	HBG021357
ENSMUSG00000040158	MOUSE11_76_PE16	HBG021357
ENSMUSG00000059883	MOUSE15_98_PE3	HBG024409
ENSMUSG00000034042	MOUSE4_119_PE27	HBG021882
ENSMUSG00000042854	MOUSE2_169_PE4	HBG001581
ENSMUSG00000039725	MOUSE2_167_PE40	HBG001581
ENSMUSG00000031878	MOUSE8_109_PE17	HBG021091
ENSMUSG00000035227	MOUSE7_103_PE13	HBG005338
ENSMUSG00000053094	MOUSE5_135_PE21	HBG022623
ENSMUSG00000042286	MOUSE14_31_PE24	HBG022184
ENSMUSG00000031949	MOUSE8_117_PE13	HBG002333
ENSMUSG00000050973	MOUSE7_83_PE6	HBG059729
ENSMUSG00000045751	MOUSE4_25_PE2	HBG023715
ENSMUSG00000032937	MOUSE17_93_PE1	HBG000310
ENSMUSG00000024107	MOUSE17_92_PE9	HBG000310
ENSMUSG00000002104	MOUSE2_92_PE17	HBG020600
ENSMUSG00000031568	MOUSE8_50_PE2	HBG001922
ENSMUSG00000031246	MOUSEX_106_PE5	HBG082334
ENSMUSG00000040666	MOUSE16_99_PE10	HBG082334
ENSMUSG00000032261	MOUSE9_87_PE4	HBG082334
ENSMUSG00000028843	MOUSE4_137_PE36	HBG082334
ENSMUSG00000020528	MOUSE11_64_PE8	HBG059348
ENSMUSG00000060423	MOUSEX_118_PE1	HBG059348
ENSMUSG00000038732	MOUSE13_32_PE2	HBG030094
ENSMUSG00000004631	MOUSE6_5_PE4	HBG021421
ENSMUSG00000001508	MOUSE11_98_PE4	HBG021421
ENSMUSG00000038374	MOUSE3_99_PE47	HBG061273
ENSMUSG00000017943	MOUSE2_165_PE12	HBG020261
ENSMUSG00000025777	MOUSE1_18_PE11	HBG020261
ENSMUSG00000072772	MOUSE6_125_PE13	HBG000248
ENSMUSG00000028917	MOUSE4_145_PE30	HBG020758
ENSMUSG00000041671	MOUSE6_143_PE3	HBG004356
ENSMUSG00000030423	MOUSE7_39_PE5	HBG021118
ENSMUSG00000024360	MOUSE18_37_PE7	HBG008496
ENSMUSG00000029059	MOUSE4_158_PE11	HBG059671
ENSMUSG00000071658	MOUSE19_9_PE27	HBG009110
ENSMUSG00000063594	MOUSE7_17_PE7	HBG009110
ENSMUSG00000048240	MOUSE10_84_PE5	HBG009110
ENSMUSG00000068523	MOUSE3_150_PE19	HBG009110
ENSMUSG00000068481	MOUSE16_23_PE14	HBG009110
ENSMUSG00000032766	MOUSE6_4_PE9	HBG009110
ENSMUSG00000029663	MOUSE6_4_PE8	HBG009110
ENSMUSG00000025739	MOUSE17_27_PE26	HBG009110
ENSMUSG00000039163	MOUSE9_122_PE5	HBG017370
ENSMUSG00000028927	MOUSE4_144_PE12	HBG025467
ENSMUSG00000026385	MOUSE1_125_PE5	HBG027444
ENSMUSG00000060068	MOUSE11_56_PE17	HBG027444
ENSMUSG00000038057	MOUSE11_79_PE11	HBG027444
ENSMUSG00000026644	MOUSE2_4_PE7	HBG027444
ENSMUSG00000024486	MOUSE18_38_PE8	HBG019334
ENSMUSG00000033569	MOUSE1_27_PE1	HBG056866
ENSMUSG00000070319	MOUSE9_22_PE4	HBG024923
ENSMUSG00000010755	MOUSE7_148_PE5	HBG008781
ENSMUSG00000056228	MOUSE8_12_PE6	HBG008781
ENSMUSG00000040785	MOUSE16_98_PE5	HBG070489
ENSMUSG00000050786	MOUSE6_50_PE1	HBG024130
ENSMUSG00000005949	MOUSE11_76_PE17	HBG029717
ENSMUSG00000037197	MOUSE2_12_PE10	HBG030039
ENSMUSG00000004356	MOUSE10_92_PE5	HBG015277
ENSMUSG00000029500	MOUSE5_114_PE11	HBG002089
ENSMUSG00000020376	MOUSE11_52_PE12	HBG047185
ENSMUSG00000036503	MOUSE3_60_PE3	HBG047185
ENSMUSG00000040746	MOUSE11_73_PE75	HBG047185
ENSMUSG00000027243	MOUSE2_92_PE51	HBG075692
ENSMUSG00000032594	MOUSE9_112_PE38	HBG089794
ENSMUSG00000019214	MOUSE17_27_PE27	HBG068240
ENSMUSG00000027016	MOUSE2_78_PE7	HBG056530
ENSMUSG00000035311	MOUSE10_91_PE16	HBG024475
ENSMUSG00000042589	MOUSE5_126_PE6	HBG038521
ENSMUSG00000028093	MOUSE3_100_PE8	HBG061118
ENSMUSG00000032641	MOUSE6_135_PE12	HBG025685
ENSMUSG00000025786	MOUSE9_127_PE13	HBG037325
ENSMUSG00000029472	MOUSE5_127_PE6	HBG077905
ENSMUSG00000022100	MOUSE14_71_PE23	HBG040299
ENSMUSG00000017428	MOUSE11_83_PE20	HBG008215
ENSMUSG00000022474	MOUSE15_85_PE20	HBG019107
ENSMUSG00000019996	MOUSE10_21_PE3	HBG058115
ENSMUSG00000027207	MOUSE2_127_PE8	HBG010199
ENSMUSG00000024104	MOUSE6_116_PE20	HBG026037
ENSMUSG00000043391	MOUSE16_22_PE8	HBG038257
ENSMUSG00000040536	MOUSE4_16_PE1	HBG057406
ENSMUSG00000031837	MOUSE8_125_PE3	HBG057406
ENSMUSG00000005804	MOUSE2_124_PE11	HBG025931
ENSMUSG00000037010	MOUSEX_45_PE8	HBG056993
ENSMUSG00000032688	MOUSE18_68_PE8	HBG037744
ENSMUSG00000021606	MOUSE13_76_PE5	HBG051774
ENSMUSG00000048458	MOUSE3_109_PE6	HBG061736
ENSMUSG00000049643	MOUSE7_28_PE22	HBG021164
ENSMUSG00000044845	MOUSE18_78_PE4	HBG010307
ENSMUSG00000046620	MOUSE12_53_PE2	HBG010307
ENSMUSG00000054234	MOUSE7_66_PE2	HBG010307
ENSMUSG00000003429	MOUSE7_46_PE37	HBG010307
ENSMUSG00000019297	MOUSE14_56_PE35	HBG019399
ENSMUSG00000025722	MOUSE7_83_PE29	HBG021977
ENSMUSG00000059182	MOUSE6_52_PE8	HBG021505
ENSMUSG00000057058	MOUSE11_99_PE25	HBG021505
ENSMUSG00000022451	MOUSE15_98_PE5	HBG001015
ENSMUSG00000073918	MOUSE7_108_PE28	HBG001015
ENSMUSG00000030555	MOUSE7_70_PE4	HBG061882
ENSMUSG00000028124	MOUSE3_125_PE11	HBG032634
ENSMUSG00000025869	MOUSE13_57_PE7	HBG061421
ENSMUSG00000030982	MOUSE7_122_PE14	HBG007128
ENSMUSG00000039787	MOUSE2_31_PE3	HBG010471
ENSMUSG00000007030	MOUSE17_37_PE30	HBG022366
ENSMUSG00000028478	MOUSE4_45_PE26	HBG035198
ENSMUSG00000047547	MOUSE13_57_PE10	HBG035198
ENSMUSG00000024583	MOUSE18_66_PE7	HBG003036
ENSMUSG00000061013	MOUSE18_8_PE1	HBG042024
ENSMUSG00000024975	MOUSE19_55_PE15	HBG001302
ENSMUSG00000046523	MOUSE14_76_PE12	HBG020052
ENSMUSG00000031787	MOUSE8_100_PE5	HBG011650
ENSMUSG00000023106	MOUSE5_128_PE7	HBG006190
ENSMUSG00000029227	MOUSE5_78_PE1	HBG089793
ENSMUSG00000034832	MOUSE6_82_PE32	HBG026327
ENSMUSG00000002660	MOUSE17_59_PE35	HBG004162
ENSMUSG00000024222	MOUSE17_30_PE23	HBG022658
ENSMUSG00000030357	MOUSE6_129_PE4	HBG022658
ENSMUSG00000040013	MOUSE5_140_PE31	HBG022658
ENSMUSG00000015357	MOUSE9_68_PE14	HBG007416
ENSMUSG00000037846	MOUSE10_70_PE1	HBG023018
ENSMUSG00000024072	MOUSE17_78_PE2	HBG034541
ENSMUSG00000029623	MOUSE5_151_PE3	HBG038526
ENSMUSG00000027175	MOUSE2_106_PE3	HBG029634
ENSMUSG00000020034	MOUSE10_87_PE5	HBG029634
ENSMUSG00000005907	MOUSE5_4_PE8	HBG037454
ENSMUSG00000049878	MOUSE4_124_PE18	HBG057716
ENSMUSG00000020328	MOUSE11_42_PE4	HBG025682
ENSMUSG00000037075	MOUSE15_61_PE18	HBG048832
ENSMUSG00000021594	MOUSE13_73_PE1	HBG038250
ENSMUSG00000030470	MOUSE7_50_PE7	HBG059752
ENSMUSG00000009647	MOUSE10_61_PE11	HBG085344
ENSMUSG00000042489	MOUSE4_130_PE9	HBG077111
ENSMUSG00000027855	MOUSE3_106_PE3	HBG058901
ENSMUSG00000030226	MOUSE6_139_PE1	HBG054966
ENSMUSG00000032698	MOUSE2_105_PE5	HBG054966
ENSMUSG00000046844	MOUSE8_119_PE10	HBG019561
ENSMUSG00000028199	MOUSE3_158_PE11	HBG019561
ENSMUSG00000028378	MOUSE4_61_PE5	HBG019561
ENSMUSG00000072946	MOUSE12_88_PE24	HBG019561
ENSMUSG00000017561	MOUSE11_83_PE4	HBG047818
ENSMUSG00000044254	MOUSE4_109_PE2	HBG057138
ENSMUSG00000030612	MOUSE7_81_PE4	HBG048518
ENSMUSG00000040133	MOUSE2_119_PE6	HBG019439
ENSMUSG00000038518	MOUSE13_47_PE1	HBG022417
ENSMUSG00000028648	MOUSE4_127_PE10	HBG023982
ENSMUSG00000043062	MOUSE16_45_PE2	HBG023982
ENSMUSG00000053475	MOUSE2_52_PE5	HBG023257
ENSMUSG00000000085	MOUSE4_124_PE2	HBG068469
ENSMUSG00000028121	MOUSE3_126_PE1	HBG024958
ENSMUSG00000027303	MOUSE2_132_PE11	HBG061381
ENSMUSG00000021745	MOUSE14_11_PE1	HBG061381
ENSMUSG00000053141	MOUSE2_164_PE1	HBG061381
ENSMUSG00000019889	MOUSE10_29_PE2	HBG061381
ENSMUSG00000023075	MOUSE4_127_PE11	HBG032633
ENSMUSG00000042804	MOUSE4_155_PE22	HBG041557
ENSMUSG00000040022	MOUSE19_62_PE1	HBG071967
ENSMUSG00000029910	MOUSE6_66_PE8	HBG081806
ENSMUSG00000028114	MOUSE3_126_PE14	HBG001640
ENSMUSG00000046447	MOUSE4_142_PE14	HBG020962
ENSMUSG00000007721	MOUSE8_75_PE32	HBG003115
ENSMUSG00000021256	MOUSE12_91_PE1	HBG022990
ENSMUSG00000037568	MOUSE1_197_PE3	HBG022990
ENSMUSG00000034300	MOUSE18_36_PE25	HBG083205
ENSMUSG00000027309	MOUSE2_132_PE23	HBG020171
ENSMUSG00000034152	MOUSE13_77_PE20	HBG021096
ENSMUSG00000043251	MOUSE8_110_PE14	HBG021096
ENSMUSG00000029851	MOUSE6_44_PE24	HBG090642
ENSMUSG00000018656	MOUSE6_44_PE23	HBG090642
ENSMUSG00000036667	MOUSE6_44_PE26	HBG090642
ENSMUSG00000035378	MOUSE6_100_PE2	HBG022152
ENSMUSG00000036442	MOUSE8_110_PE50	HBG021047
ENSMUSG00000029179	MOUSE5_55_PE6	HBG024719
ENSMUSG00000029763	MOUSE6_35_PE4	HBG001557
ENSMUSG00000044768	MOUSE1_102_PE1	HBG025159
ENSMUSG00000070056	MOUSE8_38_PE1	HBG022941
ENSMUSG00000017299	MOUSE2_167_PE6	HBG020266
ENSMUSG00000040478	MOUSE4_22_PE1	HBG025538
ENSMUSG00000004610	MOUSE7_44_PE21	HBG000776
ENSMUSG00000026064	MOUSE1_32_PE6	HBG024378
ENSMUSG00000071558	MOUSE19_42_PE4	HBG024378
ENSMUSG00000060795	MOUSE2_21_PE1	HBG024378
ENSMUSG00000058873	MOUSE6_131_PE3	HBG024378
ENSMUSG00000060695	MOUSE14_40_PE2	HBG024378
ENSMUSG00000032257	MOUSE9_51_PE12	HBG021854
ENSMUSG00000033809	MOUSE16_21_PE25	HBG004668
ENSMUSG00000038963	MOUSE2_183_PE11	HBG069193
ENSMUSG00000030737	MOUSE7_103_PE8	HBG069193
ENSMUSG00000032548	MOUSE9_107_PE1	HBG069193
ENSMUSG00000021504	MOUSE13_58_PE17	HBG025001
ENSMUSG00000021314	MOUSE13_20_PE2	HBG064013
ENSMUSG00000061360	MOUSE15_85_PE15	HBG005511
ENSMUSG00000020523	MOUSE11_59_PE3	HBG038374
ENSMUSG00000029185	MOUSE5_67_PE4	HBG038374
ENSMUSG00000022673	MOUSE16_16_PE4	HBG006876
ENSMUSG00000007891	MOUSE7_146_PE47	HBG020499
ENSMUSG00000070645	MOUSE1_138_PE8	HBG020499
ENSMUSG00000032086	MOUSE9_48_PE4	HBG020499
ENSMUSG00000026761	MOUSE2_49_PE2	HBG004097
ENSMUSG00000042351	MOUSE15_84_PE2	HBG008757
ENSMUSG00000032504	MOUSE9_118_PE2	HBG057525
ENSMUSG00000031696	MOUSE8_90_PE3	HBG059913
ENSMUSG00000040913	MOUSE19_47_PE4	HBG038063
ENSMUSG00000022385	MOUSE15_89_PE9	HBG058321
ENSMUSG00000007872	MOUSE4_139_PE32	HBG074656
ENSMUSG00000020644	MOUSE12_26_PE13	HBG074656
ENSMUSG00000021379	MOUSE13_50_PE2	HBG074656
ENSMUSG00000048230	MOUSE15_38_PE5	HBG057253
ENSMUSG00000030494	MOUSE7_36_PE8	HBG000158
ENSMUSG00000022580	MOUSE15_79_PE7	HBG000158
ENSMUSG00000049571	MOUSE7_144_PE6	HBG056861
ENSMUSG00000055041	MOUSE15_80_PE30	HBG020448
ENSMUSG00000036098	MOUSE19_11_PE13	HBG078985
ENSMUSG00000014232	MOUSE16_4_PE16	HBG030909
ENSMUSG00000073609	MOUSE1_98_PE12	HBG001379
ENSMUSG00000022160	MOUSE14_53_PE5	HBG004855
ENSMUSG00000037487	MOUSE15_40_PE2	HBG011580
ENSMUSG00000027551	MOUSE2_171_PE12	HBG023942
ENSMUSG00000035226	MOUSE2_166_PE6	HBG041680
ENSMUSG00000032890	MOUSE4_124_PE11	HBG041680
ENSMUSG00000055762	MOUSE15_79_PE15	HBG020382
ENSMUSG00000035575	MOUSE11_83_PE1	HBG053487
ENSMUSG00000030978	MOUSE7_106_PE2	HBG010006
ENSMUSG00000029610	MOUSE5_149_PE26	HBG022711
ENSMUSG00000037316	MOUSE8_28_PE10	HBG071976
ENSMUSG00000022024	MOUSE14_80_PE14	HBG020044
ENSMUSG00000026500	MOUSE1_184_PE7	HBG065148
ENSMUSG00000032498	MOUSE9_115_PE34	HBG001314
ENSMUSG00000032035	MOUSE9_34_PE7	HBG021604
ENSMUSG00000074766	MOUSE2_142_PE1	HBG072411
ENSMUSG00000031546	MOUSE8_25_PE7	HBG001810
ENSMUSG00000037636	MOUSEX_34_PE9	HBG023627
ENSMUSG00000028414	MOUSE4_55_PE8	HBG026179
ENSMUSG00000026896	MOUSE2_63_PE4	HBG048168
ENSMUSG00000038151	MOUSE10_46_PE2	HBG057548
ENSMUSG00000048799	MOUSE18_56_PE5	HBG024998
ENSMUSG00000028873	MOUSE4_128_PE14	HBG058848
ENSMUSG00000050188	MOUSE4_129_PE8	HBG023993
ENSMUSG00000054387	MOUSE1_137_PE19	HBG026021
ENSMUSG00000030278	MOUSE6_113_PE21	HBG059743
ENSMUSG00000022219	MOUSE14_56_PE37	HBG059743
ENSMUSG00000024526	MOUSE18_70_PE7	HBG059743
ENSMUSG00000034801	MOUSE12_73_PE3	HBG002388
ENSMUSG00000024241	MOUSE17_84_PE1	HBG002388
ENSMUSG00000002057	MOUSE11_81_PE49	HBG057071
ENSMUSG00000042002	MOUSE5_118_PE10	HBG057071
ENSMUSG00000031098	MOUSE7_147_PE1	HBG067820
ENSMUSG00000030731	MOUSE7_45_PE42	HBG067820
ENSMUSG00000027849	MOUSE3_107_PE2	HBG067820
ENSMUSG00000063260	MOUSE15_93_PE23	HBG067820
ENSMUSG00000041479	MOUSE14_34_PE12	HBG067820
ENSMUSG00000049303	MOUSE19_5_PE35	HBG067820
ENSMUSG00000068923	MOUSE3_91_PE50	HBG067820
ENSMUSG00000024261	MOUSE18_33_PE3	HBG067820
ENSMUSG00000026395	MOUSE1_143_PE1	HBG044057
ENSMUSG00000021076	MOUSE12_74_PE3	HBG005045
ENSMUSG00000023913	MOUSE17_45_PE5	HBG077100
ENSMUSG00000045629	MOUSE18_65_PE2	HBG024811
ENSMUSG00000036553	MOUSE5_38_PE7	HBG024811
ENSMUSG00000004266	MOUSE6_125_PE12	HBG048746
ENSMUSG00000043733	MOUSE5_125_PE10	HBG048746
ENSMUSG00000039282	MOUSE10_12_PE1	HBG026336
ENSMUSG00000028540	MOUSE4_121_PE11	HBG027904
ENSMUSG00000022332	MOUSE15_72_PE2	HBG068190
ENSMUSG00000025645	MOUSE9_113_PE34	HBG085423
ENSMUSG00000024037	MOUSE17_33_PE20	HBG023009
ENSMUSG00000074476	MOUSE9_22_PE46	HBG024935
ENSMUSG00000028641	MOUSE4_122_PE33	HBG056870
ENSMUSG00000038168	MOUSE16_27_PE5	HBG056870
ENSMUSG00000023191	MOUSE6_125_PE26	HBG056870
ENSMUSG00000032431	MOUSE9_118_PE13	HBG056870
ENSMUSG00000031749	MOUSE8_116_PE11	HBG075007
ENSMUSG00000068225	MOUSE16_54_PE1	HBG059570
ENSMUSG00000037742	MOUSE9_82_PE5	HBG059570
ENSMUSG00000052588	MOUSE2_42_PE1	HBG059570
ENSMUSG00000019977	MOUSE10_22_PE8	HBG059570
ENSMUSG00000030735	MOUSE8_72_PE4	HBG059570
ENSMUSG00000073838	MOUSE7_130_PE14	HBG059570
ENSMUSG00000025090	MOUSE19_60_PE7	HBG038072
ENSMUSG00000043859	MOUSE10_74_PE2	HBG058497
ENSMUSG00000024165	MOUSE17_26_PE66	HBG058497
ENSMUSG00000043294	MOUSE11_50_PE2	HBG058497
ENSMUSG00000050503	MOUSE9_69_PE16	HBG019485
ENSMUSG00000032869	MOUSE2_153_PE16	HBG084726
ENSMUSG00000022844	MOUSE16_37_PE6	HBG021678
ENSMUSG00000074980	MOUSE16_68_PE3	HBG057623
ENSMUSG00000022972	MOUSE16_94_PE10	HBG004436
ENSMUSG00000033751	MOUSE8_89_PE23	HBG075466
ENSMUSG00000024084	MOUSE17_82_PE15	HBG006363
ENSMUSG00000018040	MOUSE15_86_PE19	HBG059111
ENSMUSG00000047016	MOUSE16_66_PE1	HBG006867
ENSMUSG00000031289	MOUSEX_143_PE3	HBG059667
ENSMUSG00000037373	MOUSE5_35_PE15	HBG056715
ENSMUSG00000039983	MOUSE2_120_PE18	HBG019454
ENSMUSG00000025188	MOUSE19_44_PE5	HBG022808
ENSMUSG00000039911	MOUSE4_153_PE13	HBG015433
ENSMUSG00000035764	MOUSE16_34_PE7	HBG015433
ENSMUSG00000044628	MOUSE2_26_PE20	HBG038704
ENSMUSG00000071330	MOUSE10_43_PE3	HBG042738
ENSMUSG00000022867	MOUSE16_80_PE1	HBG020488
ENSMUSG00000032267	MOUSE9_51_PE5	HBG020488
ENSMUSG00000026986	MOUSE2_25_PE1	HBG037676
ENSMUSG00000020397	MOUSE11_48_PE17	HBG032128
ENSMUSG00000040713	MOUSE1_171_PE13	HBG040926
ENSMUSG00000050967	MOUSE1_41_PE12	HBG040926
ENSMUSG00000031906	MOUSE8_111_PE13	HBG021056
ENSMUSG00000071724	MOUSE15_79_PE47	HBG021056
ENSMUSG00000020462	MOUSE11_30_PE13	HBG083562
ENSMUSG00000001542	MOUSE13_79_PE1	HBG025148
ENSMUSG00000032253	MOUSE9_86_PE2	HBG071883
ENSMUSG00000022914	MOUSE16_99_PE4	HBG071883
ENSMUSG00000063663	MOUSEX_106_PE1	HBG071883
ENSMUSG00000053644	MOUSE18_59_PE3	HBG010654
ENSMUSG00000016253	MOUSE2_176_PE21	HBG017599
ENSMUSG00000022037	MOUSE14_66_PE15	HBG084108
ENSMUSG00000073177	MOUSEX_54_PE1	HBG081656
ENSMUSG00000073125	MOUSEX_71_PE8	HBG081656
ENSMUSG00000058147	MOUSEX_71_PE12	HBG081656
ENSMUSG00000057836	MOUSEX_71_PE4	HBG081656
ENSMUSG00000058328	MOUSEX_71_PE5	HBG081656
ENSMUSG00000067764	MOUSEX_71_PE13	HBG081656
ENSMUSG00000054727	MOUSEX_51_PE12	HBG081656
ENSMUSG00000020059	MOUSE10_91_PE17	HBG081656
ENSMUSG00000031125	MOUSEX_53_PE4	HBG081656
ENSMUSG00000073257	MOUSEX_30_PE3	HBG081656
ENSMUSG00000073245	MOUSEX_33_PE2	HBG081656
ENSMUSG00000068103	MOUSEX_27_PE2	HBG081656
ENSMUSG00000073247	MOUSEX_32_PE3	HBG081656
ENSMUSG00000059047	MOUSEX_28_PE3	HBG081656
ENSMUSG00000073263	MOUSEX_28_PE5	HBG081656
ENSMUSG00000064334	MOUSEX_28_PE7	HBG081656
ENSMUSG00000073255	MOUSEX_30_PE5	HBG081656
ENSMUSG00000073253	MOUSEX_31_PE1	HBG081656
ENSMUSG00000061227	MOUSEX_29_PE3	HBG081656
ENSMUSG00000072157	MOUSEX_26_PE1	HBG081656
ENSMUSG00000073267	MOUSEX_25_PE3	HBG081656
ENSMUSG00000067909	MOUSEX_53_PE1	HBG081656
ENSMUSG00000071781	MOUSEX_25_PE1	HBG081656
ENSMUSG00000071788	MOUSEX_24_PE6	HBG081656
ENSMUSG00000054626	MOUSEX_51_PE15	HBG081656
ENSMUSG00000046610	MOUSE18_69_PE1	HBG022522
ENSMUSG00000014158	MOUSE5_118_PE19	HBG003672
ENSMUSG00000036899	MOUSE6_43_PE30	HBG003672
ENSMUSG00000029868	MOUSE6_43_PE28	HBG003672
ENSMUSG00000030053	MOUSE6_87_PE5	HBG022254
ENSMUSG00000030166	MOUSE6_120_PE5	HBG058268
ENSMUSG00000041935	MOUSE15_4_PE7	HBG021894
ENSMUSG00000027131	MOUSE2_113_PE28	HBG001651
ENSMUSG00000030795	MOUSE7_132_PE13	HBG093746
ENSMUSG00000049922	MOUSE2_93_PE24	HBG002482
ENSMUSG00000042660	MOUSE18_39_PE1	HBG047229
ENSMUSG00000029706	MOUSE6_30_PE7	HBG060095
ENSMUSG00000014030	MOUSE4_46_PE1	HBG060095
ENSMUSG00000026976	MOUSE2_25_PE12	HBG060095
ENSMUSG00000001497	MOUSE12_59_PE5	HBG060095
ENSMUSG00000013584	MOUSE9_74_PE10	HBG075000
ENSMUSG00000029455	MOUSE5_125_PE28	HBG075000
ENSMUSG00000037542	MOUSE10_22_PE9	HBG075000
ENSMUSG00000024885	MOUSE19_4_PE17	HBG075000
ENSMUSG00000071235	MOUSE12_89_PE1	HBG026215
ENSMUSG00000027952	MOUSE3_92_PE49	HBG016191
ENSMUSG00000029658	MOUSE5_155_PE13	HBG025761
ENSMUSG00000071855	MOUSE18_49_PE2	HBG059116
ENSMUSG00000002343	MOUSE8_74_PE39	HBG006364
ENSMUSG00000031622	MOUSE8_77_PE13	HBG047376
ENSMUSG00000070806	MOUSE4_122_PE43	HBG019744
ENSMUSG00000026158	MOUSE1_25_PE3	HBG084895
ENSMUSG00000038025	MOUSE13_51_PE5	HBG078530
ENSMUSG00000041229	MOUSEX_147_PE15	HBG078530
ENSMUSG00000023350	MOUSE17_35_PE18	HBG078530
ENSMUSG00000020594	MOUSE12_9_PE14	HBG019795
ENSMUSG00000026568	MOUSE1_171_PE7	HBG026102
ENSMUSG00000009214	MOUSE2_28_PE12	HBG059660
ENSMUSG00000058325	MOUSE7_139_PE1	HBG056712
ENSMUSG00000044447	MOUSE14_68_PE8	HBG056712
ENSMUSG00000020143	MOUSE11_36_PE1	HBG056712
ENSMUSG00000022370	MOUSE15_58_PE10	HBG005507
ENSMUSG00000031728	MOUSE8_115_PE2	HBG021109
ENSMUSG00000044934	MOUSE13_67_PE5	HBG018213
ENSMUSG00000030306	MOUSE6_149_PE4	HBG047061
ENSMUSG00000029176	MOUSE5_55_PE7	HBG046186
ENSMUSG00000037262	MOUSE2_11_PE2	HBG004726
ENSMUSG00000067825	MOUSE6_121_PE11	HBG024591
ENSMUSG00000040591	MOUSE2_92_PE40	HBG020611
ENSMUSG00000020272	MOUSE11_34_PE4	HBG048858
ENSMUSG00000001666	MOUSE10_78_PE22	HBG073404
ENSMUSG00000002280	MOUSE17_27_PE32	HBG009438
ENSMUSG00000067547	MOUSE15_7_PE8	HBG058178
ENSMUSG00000038845	MOUSE11_98_PE24	HBG058178
ENSMUSG00000045140	MOUSE11_87_PE19	HBG062716
ENSMUSG00000015971	MOUSE14_30_PE3	HBG059738
ENSMUSG00000040945	MOUSE4_144_PE6	HBG003214
ENSMUSG00000052833	MOUSE7_16_PE21	HBG001687
ENSMUSG00000046417	MOUSE11_65_PE4	HBG021397
ENSMUSG00000034171	MOUSE4_119_PE10	HBG060422
ENSMUSG00000059114	MOUSE12_91_PE3	HBG047139
ENSMUSG00000022759	MOUSE16_18_PE31	HBG047139
ENSMUSG00000063804	MOUSE10_47_PE3	HBG088168
ENSMUSG00000031931	MOUSE9_15_PE11	HBG074718
ENSMUSG00000049231	MOUSE3_111_PE15	HBG003103
ENSMUSG00000067847	MOUSE2_158_PE12	HBG003103
ENSMUSG00000019710	MOUSE3_91_PE6	HBG032701
ENSMUSG00000020048	MOUSE10_90_PE2	HBG073713
ENSMUSG00000005981	MOUSE16_4_PE21	HBG073713
ENSMUSG00000018401	MOUSE11_90_PE24	HBG020974
ENSMUSG00000041977	MOUSE3_90_PE17	HBG020506
ENSMUSG00000038195	MOUSE11_78_PE30	HBG021346
ENSMUSG00000019806	MOUSE10_14_PE9	HBG060881
ENSMUSG00000029348	MOUSE5_116_PE12	HBG022632
ENSMUSG00000046378	MOUSE7_131_PE9	HBG022632
ENSMUSG00000041199	MOUSE17_27_PE28	HBG002485
ENSMUSG00000020660	MOUSE12_4_PE17	HBG071855
ENSMUSG00000068576	MOUSE15_39_PE2	HBG072295
ENSMUSG00000063229	MOUSE7_48_PE15	HBG072295
ENSMUSG00000075522	MOUSE2_16_PE6	HBG072295
ENSMUSG00000042864	MOUSE1_59_PE3	HBG072295
ENSMUSG00000075329	MOUSE2_59_PE8	HBG072295
ENSMUSG00000030851	MOUSE7_48_PE16	HBG072295
ENSMUSG00000019823	MOUSE10_43_PE6	HBG037399
ENSMUSG00000024774	MOUSE19_35_PE6	HBG038009
ENSMUSG00000046192	MOUSE6_26_PE3	HBG041120
ENSMUSG00000017009	MOUSE2_166_PE27	HBG020422
ENSMUSG00000067870	MOUSE15_94_PE7	HBG072077
ENSMUSG00000066956	MOUSE1_134_PE3	HBG072077
ENSMUSG00000072255	MOUSE12_57_PE6	HBG072077
ENSMUSG00000059999	MOUSE1_69_PE9	HBG072077
ENSMUSG00000066389	MOUSE12_95_PE11	HBG072077
ENSMUSG00000073702	MOUSE1_41_PE8	HBG072077
ENSMUSG00000070912	MOUSE5_21_PE8	HBG072077
ENSMUSG00000067794	MOUSE8_115_PE20	HBG072077
ENSMUSG00000051723	MOUSE17_85_PE5	HBG072077
ENSMUSG00000059827	MOUSE8_37_PE4	HBG072077
ENSMUSG00000070667	MOUSE4_141_PE5	HBG072077
ENSMUSG00000073986	MOUSE7_105_PE12	HBG072077
ENSMUSG00000071576	MOUSE14_16_PE1	HBG072077
ENSMUSG00000028639	MOUSE4_122_PE36	HBG077729
ENSMUSG00000024370	MOUSE18_36_PE21	HBG026608
ENSMUSG00000026051	MOUSE1_46_PE1	HBG019738
ENSMUSG00000020273	MOUSE11_25_PE7	HBG007558
ENSMUSG00000022948	MOUSE16_97_PE1	HBG021603
ENSMUSG00000031928	MOUSE9_15_PE12	HBG033404
ENSMUSG00000038497	MOUSE8_14_PE23	HBG020043
ENSMUSG00000010911	MOUSE2_104_PE7	HBG035539
ENSMUSG00000031783	MOUSE8_99_PE29	HBG003330
ENSMUSG00000040711	MOUSE11_34_PE1	HBG049088
ENSMUSG00000042608	MOUSE4_129_PE10	HBG023994
ENSMUSG00000020817	MOUSE11_74_PE1	HBG071614
ENSMUSG00000030727	MOUSE7_130_PE9	HBG071614
ENSMUSG00000021020	MOUSE12_58_PE2	HBG002428
ENSMUSG00000073079	MOUSE12_58_PE9	HBG002428
ENSMUSG00000025220	MOUSE19_47_PE8	HBG035461
ENSMUSG00000021033	MOUSE12_91_PE12	HBG007376
ENSMUSG00000004896	MOUSE3_91_PE7	HBG023778
ENSMUSG00000018583	MOUSE11_57_PE24	HBG025694
ENSMUSG00000067446	MOUSE8_102_PE2	HBG025694
ENSMUSG00000048078	MOUSE7_100_PE1	HBG025133
ENSMUSG00000016150	MOUSEX_40_PE3	HBG025133
ENSMUSG00000028677	MOUSE4_120_PE28	HBG037493
ENSMUSG00000020330	MOUSE11_42_PE3	HBG040288
ENSMUSG00000041375	MOUSE7_16_PE19	HBG057076
ENSMUSG00000060429	MOUSE15_58_PE12	HBG059325
ENSMUSG00000041308	MOUSE8_112_PE1	HBG059325
ENSMUSG00000025909	MOUSE1_9_PE1	HBG059325
ENSMUSG00000020672	MOUSE12_32_PE1	HBG059325
ENSMUSG00000002546	MOUSE2_33_PE15	HBG085733
ENSMUSG00000018999	MOUSE6_36_PE3	HBG002049
ENSMUSG00000026519	MOUSE1_187_PE8	HBG019577
ENSMUSG00000010290	MOUSE1_45_PE8	HBG019905
ENSMUSG00000068545	MOUSE6_49_PE6	HBG015962
ENSMUSG00000068674	MOUSE16_9_PE11	HBG015962
ENSMUSG00000057764	MOUSE13_7_PE3	HBG015962
ENSMUSG00000062279	MOUSE10_8_PE3	HBG015962
ENSMUSG00000057725	MOUSE4_9_PE3	HBG015962
ENSMUSG00000074975	MOUSE2_110_PE1	HBG015962
ENSMUSG00000060636	MOUSE16_34_PE31	HBG015962
ENSMUSG00000074626	MOUSE2_159_PE17	HBG015962
ENSMUSG00000070519	MOUSE5_127_PE25	HBG015962
ENSMUSG00000067575	MOUSE17_31_PE11	HBG015962
ENSMUSG00000067558	MOUSE5_35_PE12	HBG015962
ENSMUSG00000066645	MOUSE1_187_PE15	HBG015962
ENSMUSG00000068324	MOUSE16_38_PE4	HBG015962
ENSMUSG00000060450	MOUSE18_40_PE21	HBG027207
ENSMUSG00000027009	MOUSE2_80_PE3	HBG024312
ENSMUSG00000032203	MOUSE9_76_PE13	HBG029292
ENSMUSG00000022253	MOUSE15_10_PE3	HBG068527
ENSMUSG00000000420	MOUSE18_25_PE12	HBG068984
ENSMUSG00000060988	MOUSE2_55_PE1	HBG068984
ENSMUSG00000031608	MOUSE8_61_PE6	HBG068984
ENSMUSG00000031977	MOUSE8_130_PE1	HBG068984
ENSMUSG00000021130	MOUSE12_84_PE5	HBG068984
ENSMUSG00000024064	MOUSE17_77_PE1	HBG068984
ENSMUSG00000038072	MOUSE5_26_PE9	HBG068984
ENSMUSG00000038296	MOUSE7_115_PE1	HBG068984
ENSMUSG00000021962	MOUSE14_30_PE10	HBG025224
ENSMUSG00000041477	MOUSE6_119_PE3	HBG025224
ENSMUSG00000017677	MOUSE11_82_PE8	HBG020908
ENSMUSG00000029364	MOUSE5_121_PE7	HBG020908
ENSMUSG00000019988	MOUSE10_95_PE2	HBG024464
ENSMUSG00000002477	MOUSE18_11_PE10	HBG074764
ENSMUSG00000042498	MOUSEX_135_PE8	HBG026331
ENSMUSG00000002017	MOUSE17_79_PE2	HBG059453
ENSMUSG00000027349	MOUSE2_118_PE6	HBG059453
ENSMUSG00000024309	MOUSE17_36_PE13	HBG067742
ENSMUSG00000047636	MOUSE4_110_PE8	HBG023937
ENSMUSG00000030980	MOUSE7_122_PE17	HBG060202
ENSMUSG00000040455	MOUSE4_23_PE6	HBG052967
ENSMUSG00000025616	MOUSE16_90_PE4	HBG052967
ENSMUSG00000002210	MOUSE7_25_PE23	HBG021210
ENSMUSG00000033707	MOUSE15_80_PE23	HBG020450
ENSMUSG00000005718	MOUSE16_5_PE8	HBG022764
ENSMUSG00000032040	MOUSE9_37_PE6	HBG023124
ENSMUSG00000028960	MOUSE4_153_PE1	HBG029708
ENSMUSG00000059890	MOUSE9_47_PE8	HBG029708
ENSMUSG00000027670	MOUSE2_167_PE38	HBG041533
ENSMUSG00000046020	MOUSE2_155_PE9	HBG001361
ENSMUSG00000029017	MOUSE5_22_PE13	HBG004398
ENSMUSG00000025651	MOUSE9_113_PE24	HBG004398
ENSMUSG00000075232	MOUSE10_41_PE17	HBG050157
ENSMUSG00000060096	MOUSE18_67_PE7	HBG050157
ENSMUSG00000063953	MOUSE10_37_PE1	HBG050157
ENSMUSG00000068402	MOUSE9_26_PE8	HBG050157
ENSMUSG00000072376	MOUSE17_99_PE3	HBG050157
ENSMUSG00000026088	MOUSE1_40_PE4	HBG000636
ENSMUSG00000005609	MOUSE7_114_PE10	HBG063461
ENSMUSG00000031143	MOUSEX_7_PE9	HBG023594
ENSMUSG00000024201	MOUSE17_59_PE4	HBG050536
ENSMUSG00000028397	MOUSE4_76_PE2	HBG050536
ENSMUSG00000030909	MOUSE7_124_PE3	HBG006544
ENSMUSG00000040037	MOUSE3_161_PE1	HBG038234
ENSMUSG00000013367	MOUSE7_44_PE23	HBG038234
ENSMUSG00000006717	MOUSE13_26_PE12	HBG027614
ENSMUSG00000053801	MOUSE7_47_PE23	HBG004211
ENSMUSG00000023923	MOUSE17_53_PE2	HBG037893
ENSMUSG00000068391	MOUSE15_76_PE4	HBG015910
ENSMUSG00000031536	MOUSE8_24_PE19	HBG022959
ENSMUSG00000056155	MOUSE8_89_PE5	HBG084101
ENSMUSG00000068663	MOUSE16_11_PE15	HBG058517
ENSMUSG00000073574	MOUSE18_44_PE2	HBG069811
ENSMUSG00000036537	MOUSEX_35_PE5	HBG004106
ENSMUSG00000026192	MOUSE1_73_PE8	HBG008161
ENSMUSG00000029208	MOUSE5_72_PE4	HBG000018
ENSMUSG00000002028	MOUSE9_47_PE6	HBG020508
ENSMUSG00000029765	MOUSE6_34_PE1	HBG055834
ENSMUSG00000031398	MOUSEX_72_PE18	HBG055834
ENSMUSG00000031385	MOUSEX_71_PE29	HBG055834
ENSMUSG00000030521	MOUSE7_66_PE13	HBG054206
ENSMUSG00000030560	MOUSE7_91_PE2	HBG037842
ENSMUSG00000074576	MOUSE2_170_PE11	HBG000479
ENSMUSG00000071331	MOUSE10_43_PE1	HBG037397
ENSMUSG00000038160	MOUSE10_46_PE1	HBG004567
ENSMUSG00000026618	MOUSE1_191_PE4	HBG007472
ENSMUSG00000030303	MOUSE6_149_PE1	HBG014792
ENSMUSG00000040687	MOUSE2_92_PE29	HBG059040
ENSMUSG00000039632	MOUSE9_23_PE16	HBG024940
ENSMUSG00000030654	MOUSE7_122_PE1	HBG065287
ENSMUSG00000028675	MOUSE4_139_PE21	HBG057237
ENSMUSG00000017390	MOUSE11_81_PE44	HBG025372
ENSMUSG00000028307	MOUSE4_51_PE7	HBG025372
ENSMUSG00000033287	MOUSE15_81_PE27	HBG073639
ENSMUSG00000016946	MOUSE17_25_PE44	HBG073639
ENSMUSG00000022865	MOUSE16_81_PE1	HBG056805
ENSMUSG00000041842	MOUSE3_87_PE6	HBG037514
ENSMUSG00000062590	MOUSE1_90_PE7	HBG037966
ENSMUSG00000018604	MOUSE5_123_PE2	HBG069681
ENSMUSG00000031965	MOUSE9_26_PE7	HBG069681
ENSMUSG00000009097	MOUSE16_19_PE32	HBG069681
ENSMUSG00000062327	MOUSE17_9_PE14	HBG069681
ENSMUSG00000026572	MOUSE1_171_PE2	HBG069681
ENSMUSG00000028466	MOUSE4_45_PE5	HBG059164
ENSMUSG00000035726	MOUSE14_52_PE22	HBG006460
ENSMUSG00000045098	MOUSE19_4_PE11	HBG023189
ENSMUSG00000041740	MOUSE5_119_PE20	HBG009960
ENSMUSG00000035493	MOUSE13_59_PE7	HBG025065
ENSMUSG00000025235	MOUSE9_62_PE1	HBG019386
ENSMUSG00000036580	MOUSE3_57_PE10	HBG019853
ENSMUSG00000039678	MOUSE2_31_PE15	HBG005114
ENSMUSG00000074358	MOUSE7_19_PE11	HBG044106
ENSMUSG00000048949	MOUSEX_100_PE6	HBG016553
ENSMUSG00000040782	MOUSE1_164_PE6	HBG016553
ENSMUSG00000025094	MOUSE19_61_PE12	HBG087409
ENSMUSG00000036330	MOUSE8_73_PE6	HBG087409
ENSMUSG00000020413	MOUSE11_9_PE5	HBG032464
ENSMUSG00000045744	MOUSE17_26_PE23	HBG056638
ENSMUSG00000021532	MOUSE13_72_PE4	HBG038248
ENSMUSG00000059273	MOUSE7_16_PE22	HBG026028
ENSMUSG00000042851	MOUSE2_130_PE10	HBG026028
ENSMUSG00000021023	MOUSE12_58_PE10	HBG043393
ENSMUSG00000026111	MOUSE1_39_PE12	HBG007378
ENSMUSG00000071655	MOUSE19_10_PE1	HBG002381
ENSMUSG00000028447	MOUSE4_43_PE15	HBG076749
ENSMUSG00000029146	MOUSE5_33_PE29	HBG002047
ENSMUSG00000027272	MOUSE2_122_PE23	HBG003607
ENSMUSG00000031578	MOUSE8_33_PE5	HBG050412
ENSMUSG00000034160	MOUSEX_98_PE21	HBG011376
ENSMUSG00000032575	MOUSE9_111_PE16	HBG002350
ENSMUSG00000037683	MOUSE2_20_PE3	HBG020115
ENSMUSG00000039611	MOUSE4_51_PE8	HBG025375
ENSMUSG00000001100	MOUSE11_81_PE56	HBG007130
ENSMUSG00000026097	MOUSE1_55_PE14	HBG023299
ENSMUSG00000017198	MOUSE4_59_PE9	HBG023299
ENSMUSG00000031540	MOUSE8_24_PE25	HBG085114
ENSMUSG00000021767	MOUSE14_21_PE5	HBG085114
ENSMUSG00000033732	MOUSE8_116_PE5	HBG004836
ENSMUSG00000021456	MOUSE13_65_PE8	HBG016643
ENSMUSG00000029695	MOUSE6_25_PE2	HBG009263
ENSMUSG00000020097	MOUSE10_63_PE5	HBG005204
ENSMUSG00000039377	MOUSE1_190_PE4	HBG067613
ENSMUSG00000032633	MOUSE11_62_PE11	HBG038461
ENSMUSG00000032870	MOUSE4_124_PE15	HBG085575
ENSMUSG00000050010	MOUSE5_70_PE4	HBG081819
ENSMUSG00000032410	MOUSE9_99_PE11	HBG003339
ENSMUSG00000020368	MOUSE11_52_PE21	HBG085203
ENSMUSG00000020666	MOUSE12_4_PE9	HBG044912
ENSMUSG00000049696	MOUSE7_42_PE9	HBG044912
ENSMUSG00000048690	MOUSE1_157_PE5	HBG044912
ENSMUSG00000011179	MOUSE12_18_PE10	HBG044912
ENSMUSG00000024908	MOUSE19_4_PE8	HBG068017
ENSMUSG00000016619	MOUSE15_88_PE12	HBG024622
ENSMUSG00000072878	MOUSE6_96_PE2	HBG024622
ENSMUSG00000024082	MOUSE17_82_PE13	HBG003758
ENSMUSG00000028830	MOUSE4_130_PE15	HBG078683
ENSMUSG00000006711	MOUSE13_26_PE14	HBG078683
ENSMUSG00000020156	MOUSE10_83_PE27	HBG058434
ENSMUSG00000042515	MOUSEX_135_PE6	HBG058434
ENSMUSG00000071745	MOUSEX_71_PE7	HBG058434
ENSMUSG00000067771	MOUSEX_71_PE6	HBG058434
ENSMUSG00000073121	MOUSEX_71_PE14	HBG058434
ENSMUSG00000054836	MOUSE9_114_PE23	HBG024996
ENSMUSG00000049470	MOUSE11_55_PE5	HBG057934
ENSMUSG00000039318	MOUSE1_191_PE3	HBG020664
ENSMUSG00000038510	MOUSE10_41_PE15	HBG000374
ENSMUSG00000034416	MOUSE8_122_PE9	HBG021024
ENSMUSG00000018921	MOUSE11_73_PE54	HBG060791
ENSMUSG00000033105	MOUSE10_79_PE25	HBG021783
ENSMUSG00000043716	MOUSE1_17_PE6	HBG072596
ENSMUSG00000056936	MOUSE17_35_PE7	HBG072596
ENSMUSG00000054284	MOUSE5_86_PE1	HBG072596
ENSMUSG00000025922	MOUSE15_62_PE4	HBG072596
ENSMUSG00000053793	MOUSE5_43_PE1	HBG072596
ENSMUSG00000059002	MOUSE6_146_PE8	HBG072596
ENSMUSG00000054332	MOUSEX_34_PE8	HBG072596
ENSMUSG00000058101	MOUSE15_35_PE3	HBG072596
ENSMUSG00000047095	MOUSEX_58_PE12	HBG072596
ENSMUSG00000061015	MOUSE4_71_PE1	HBG072596
ENSMUSG00000063888	MOUSE17_48_PE47	HBG072596
ENSMUSG00000028066	MOUSE3_91_PE33	HBG023771
ENSMUSG00000019795	MOUSE10_8_PE6	HBG003261
ENSMUSG00000044966	MOUSE11_18_PE1	HBG025929
ENSMUSG00000031903	MOUSE8_111_PE9	HBG083171
ENSMUSG00000035237	MOUSE8_110_PE56	HBG083171
ENSMUSG00000020471	MOUSE11_6_PE24	HBG030021
ENSMUSG00000042605	MOUSE5_126_PE1	HBG020901
ENSMUSG00000032637	MOUSE7_130_PE15	HBG020901
ENSMUSG00000015501	MOUSE10_15_PE1	HBG057368
ENSMUSG00000000317	MOUSE11_73_PE44	HBG021333
ENSMUSG00000037747	MOUSE10_73_PE3	HBG023007
ENSMUSG00000003469	MOUSE14_71_PE7	HBG023007
ENSMUSG00000027323	MOUSE2_120_PE23	HBG081941
ENSMUSG00000022429	MOUSE15_83_PE3	HBG081941
ENSMUSG00000036502	MOUSEX_35_PE28	HBG081294
ENSMUSG00000008373	MOUSE7_4_PE6	HBG008909
ENSMUSG00000004462	MOUSE16_24_PE2	HBG021752
ENSMUSG00000032965	MOUSE16_52_PE3	HBG003052
ENSMUSG00000022551	MOUSE15_79_PE52	HBG085168
ENSMUSG00000027463	MOUSE2_153_PE20	HBG020457
ENSMUSG00000029535	MOUSE5_119_PE25	HBG004059
ENSMUSG00000050471	MOUSE9_37_PE12	HBG023123
ENSMUSG00000041763	MOUSE1_46_PE4	HBG002273
ENSMUSG00000028995	MOUSE5_25_PE6	HBG024128
ENSMUSG00000038174	MOUSE1_61_PE10	HBG024128
ENSMUSG00000032459	MOUSE9_102_PE6	HBG021676
ENSMUSG00000031217	MOUSEX_96_PE4	HBG020036
ENSMUSG00000003934	MOUSE11_72_PE45	HBG020036
ENSMUSG00000069255	MOUSE13_32_PE5	HBG073223
ENSMUSG00000021768	MOUSE14_21_PE9	HBG073223
ENSMUSG00000047067	MOUSE1_97_PE17	HBG073223
ENSMUSG00000018648	MOUSE11_87_PE3	HBG073223
ENSMUSG00000053205	MOUSE14_45_PE11	HBG073223
ENSMUSG00000071748	MOUSEX_66_PE8	HBG073223
ENSMUSG00000030079	MOUSE6_87_PE27	HBG000526
ENSMUSG00000003868	MOUSE7_46_PE66	HBG000526
ENSMUSG00000026374	MOUSE1_123_PE1	HBG000250
ENSMUSG00000020100	MOUSE10_63_PE1	HBG061752
ENSMUSG00000020052	MOUSE10_90_PE14	HBG041242
ENSMUSG00000009248	MOUSE7_147_PE20	HBG041242
ENSMUSG00000042349	MOUSE1_136_PE6	HBG000985
ENSMUSG00000030610	MOUSE7_81_PE6	HBG002977
ENSMUSG00000026709	MOUSE1_166_PE13	HBG002505
ENSMUSG00000034501	MOUSE12_76_PE2	HBG043517
ENSMUSG00000042626	MOUSE3_92_PE46	HBG060901
ENSMUSG00000020312	MOUSE10_82_PE19	HBG060901
ENSMUSG00000026965	MOUSE2_26_PE25	HBG004088
ENSMUSG00000001366	MOUSE9_81_PE8	HBG000631
ENSMUSG00000039068	MOUSE3_156_PE15	HBG038594
ENSMUSG00000028345	MOUSE4_50_PE3	HBG037341
ENSMUSG00000067851	MOUSE1_11_PE10	HBG009396
ENSMUSG00000012609	MOUSE12_90_PE8	HBG038652
ENSMUSG00000029648	MOUSE5_153_PE12	HBG019970
ENSMUSG00000020357	MOUSE11_52_PE1	HBG019970
ENSMUSG00000062960	MOUSE5_79_PE2	HBG019970
ENSMUSG00000014773	MOUSE17_17_PE2	HBG037720
ENSMUSG00000003436	MOUSE7_29_PE12	HBG037720
ENSMUSG00000021577	MOUSE13_77_PE23	HBG009050
ENSMUSG00000055675	MOUSE8_16_PE4	HBG057314
ENSMUSG00000028405	MOUSE4_41_PE3	HBG059426
ENSMUSG00000057363	MOUSE1_46_PE2	HBG001599
ENSMUSG00000020430	MOUSE11_4_PE50	HBG006592
ENSMUSG00000039184	MOUSE15_48_PE1	HBG006592
ENSMUSG00000021589	MOUSE13_79_PE3	HBG026082
ENSMUSG00000062937	MOUSE4_91_PE20	HBG067943
ENSMUSG00000022421	MOUSE15_83_PE18	HBG070068
ENSMUSG00000030036	MOUSE6_82_PE16	HBG018253
ENSMUSG00000073792	MOUSE4_102_PE3	HBG058873
ENSMUSG00000028334	MOUSE4_48_PE2	HBG057573
ENSMUSG00000038729	MOUSE4_59_PE15	HBG025391
ENSMUSG00000035949	MOUSE2_36_PE7	HBG025436
ENSMUSG00000027508	MOUSE3_10_PE4	HBG020368
ENSMUSG00000051251	MOUSE1_178_PE6	HBG058060
ENSMUSG00000048540	MOUSE3_105_PE6	HBG058060
ENSMUSG00000054894	MOUSE12_73_PE5	HBG074965
ENSMUSG00000024797	MOUSE19_7_PE9	HBG005935
ENSMUSG00000024135	MOUSE17_90_PE2	HBG000219
ENSMUSG00000044700	MOUSE4_153_PE10	HBG020709
ENSMUSG00000048920	MOUSE7_17_PE4	HBG009287
ENSMUSG00000019997	MOUSE10_25_PE21	HBG076242
ENSMUSG00000027656	MOUSE2_166_PE4	HBG076242
ENSMUSG00000032898	MOUSE5_122_PE2	HBG037985
ENSMUSG00000026123	MOUSE1_37_PE1	HBG077402
ENSMUSG00000030701	MOUSE7_104_PE15	HBG077402
ENSMUSG00000021838	MOUSE14_47_PE7	HBG048244
ENSMUSG00000037513	MOUSE7_29_PE23	HBG048244
ENSMUSG00000039033	MOUSE2_142_PE3	HBG056783
ENSMUSG00000032959	MOUSE5_121_PE3	HBG056024
ENSMUSG00000075268	MOUSE10_30_PE4	HBG056024
ENSMUSG00000048362	MOUSE12_40_PE4	HBG056024
ENSMUSG00000047104	MOUSE6_135_PE25	HBG056024
ENSMUSG00000040374	MOUSE3_6_PE5	HBG046904
ENSMUSG00000027035	MOUSE2_69_PE7	HBG088367
ENSMUSG00000030510	MOUSE7_69_PE6	HBG088367
ENSMUSG00000055694	MOUSE8_74_PE45	HBG088367
ENSMUSG00000022724	MOUSE16_62_PE20	HBG056445
ENSMUSG00000033478	MOUSE19_59_PE4	HBG056837
ENSMUSG00000022095	MOUSE14_71_PE16	HBG056837
ENSMUSG00000034168	MOUSE12_91_PE5	HBG069907
ENSMUSG00000025283	MOUSEX_151_PE12	HBG007105
ENSMUSG00000019846	MOUSE10_40_PE1	HBG058377
ENSMUSG00000030056	MOUSE6_87_PE12	HBG014930
ENSMUSG00000028100	MOUSE3_99_PE54	HBG023795
ENSMUSG00000022840	MOUSE16_37_PE4	HBG090614
ENSMUSG00000022376	MOUSE15_67_PE3	HBG090614
ENSMUSG00000031659	MOUSE8_93_PE9	HBG090614
ENSMUSG00000031485	MOUSE8_29_PE5	HBG005369
ENSMUSG00000072910	MOUSE12_92_PE3	HBG003143
ENSMUSG00000022864	MOUSE16_81_PE3	HBG025218
ENSMUSG00000028910	MOUSE4_135_PE4	HBG000056
ENSMUSG00000021852	MOUSE14_50_PE1	HBG061554
ENSMUSG00000034266	MOUSE12_90_PE3	HBG057888
ENSMUSG00000029916	MOUSE6_42_PE2	HBG052871
ENSMUSG00000009681	MOUSE10_78_PE6	HBG057859
ENSMUSG00000005687	MOUSE3_106_PE12	HBG004199
ENSMUSG00000062070	MOUSEX_103_PE8	HBG000720
ENSMUSG00000069008	MOUSE3_60_PE5	HBG000720
ENSMUSG00000066632	MOUSE12_11_PE4	HBG000720
ENSMUSG00000031233	MOUSE17_42_PE1	HBG000720
ENSMUSG00000026989	MOUSE2_60_PE1	HBG059319
ENSMUSG00000007029	MOUSE17_37_PE29	HBG010272
ENSMUSG00000038838	MOUSE17_37_PE84	HBG010272
ENSMUSG00000041879	MOUSE1_140_PE10	HBG000341
ENSMUSG00000027808	MOUSE3_60_PE8	HBG008238
ENSMUSG00000047180	MOUSE1_38_PE4	HBG058138
ENSMUSG00000044795	MOUSE11_72_PE38	HBG059778
ENSMUSG00000032889	MOUSE11_29_PE1	HBG059778
ENSMUSG00000028070	MOUSE3_91_PE17	HBG031931
ENSMUSG00000048967	MOUSE8_74_PE20	HBG031931
ENSMUSG00000022235	MOUSE15_33_PE10	HBG021926
ENSMUSG00000049488	MOUSE4_13_PE1	HBG038098
ENSMUSG00000027787	MOUSE3_72_PE6	HBG050504
ENSMUSG00000025227	MOUSE19_48_PE1	HBG022833
ENSMUSG00000030877	MOUSE7_124_PE25	HBG022833
ENSMUSG00000061802	MOUSE18_8_PE3	HBG051053
ENSMUSG00000021466	MOUSE13_66_PE6	HBG043981
ENSMUSG00000028681	MOUSE4_120_PE18	HBG043981
ENSMUSG00000062110	MOUSE5_77_PE5	HBG071931
ENSMUSG00000027367	MOUSE2_129_PE2	HBG019778
ENSMUSG00000023966	MOUSE17_48_PE5	HBG069168
ENSMUSG00000030689	MOUSE7_131_PE3	HBG082537
ENSMUSG00000038235	MOUSE1_177_PE38	HBG071685
ENSMUSG00000025049	MOUSE19_48_PE22	HBG002180
ENSMUSG00000038697	MOUSE8_129_PE23	HBG002180
ENSMUSG00000015653	MOUSE5_6_PE10	HBG026229
ENSMUSG00000026389	MOUSE1_125_PE9	HBG026229
ENSMUSG00000012428	MOUSE5_9_PE2	HBG026229
ENSMUSG00000053472	MOUSE2_58_PE4	HBG068349
ENSMUSG00000033405	MOUSE14_74_PE7	HBG068349
ENSMUSG00000029426	MOUSE5_96_PE22	HBG069509
ENSMUSG00000002944	MOUSE5_18_PE5	HBG069509
ENSMUSG00000037936	MOUSE5_129_PE13	HBG069509
ENSMUSG00000022671	MOUSE16_16_PE7	HBG060709
ENSMUSG00000045294	MOUSE5_30_PE3	HBG069030
ENSMUSG00000027400	MOUSE2_131_PE7	HBG024045
ENSMUSG00000050088	MOUSE17_16_PE6	HBG037402
ENSMUSG00000036323	MOUSE5_81_PE9	HBG005315
ENSMUSG00000054083	MOUSE7_29_PE48	HBG083588
ENSMUSG00000031981	MOUSE8_130_PE8	HBG083588
ENSMUSG00000032855	MOUSE17_26_PE30	HBG038570
ENSMUSG00000026676	MOUSE2_6_PE1	HBG038111
ENSMUSG00000070889	MOUSE1_57_PE3	HBG023359
ENSMUSG00000036693	MOUSE5_37_PE4	HBG059365
ENSMUSG00000059060	MOUSE12_83_PE2	HBG019537
ENSMUSG00000048482	MOUSE2_111_PE1	HBG058525
ENSMUSG00000074121	MOUSE7_46_PE64	HBG058525
ENSMUSG00000049107	MOUSE6_126_PE7	HBG058525
ENSMUSG00000037376	MOUSE2_134_PE12	HBG057825
ENSMUSG00000002608	MOUSE7_26_PE40	HBG037715
ENSMUSG00000032212	MOUSE9_73_PE12	HBG078454
ENSMUSG00000015342	MOUSEX_9_PE11	HBG058144
ENSMUSG00000027708	MOUSE3_38_PE2	HBG038206
ENSMUSG00000074910	MOUSE13_52_PE4	HBG038206
ENSMUSG00000048787	MOUSE7_123_PE22	HBG038206
ENSMUSG00000051674	MOUSE5_76_PE18	HBG038206
ENSMUSG00000032002	MOUSE9_8_PE2	HBG038206
ENSMUSG00000029145	MOUSE5_33_PE28	HBG045596
ENSMUSG00000024940	MOUSE19_6_PE50	HBG057036
ENSMUSG00000001870	MOUSE17_78_PE5	HBG057036
ENSMUSG00000021893	MOUSE14_31_PE34	HBG001043
ENSMUSG00000017631	MOUSE11_79_PE19	HBG058808
ENSMUSG00000035769	MOUSE9_124_PE1	HBG010884
ENSMUSG00000057111	MOUSEX_13_PE5	HBG019468
ENSMUSG00000060036	MOUSE15_83_PE29	HBG019468
ENSMUSG00000068262	MOUSE6_87_PE7	HBG019468
ENSMUSG00000060264	MOUSE4_116_PE3	HBG019468
ENSMUSG00000025226	MOUSE19_47_PE30	HBG022834
ENSMUSG00000047648	MOUSE10_12_PE4	HBG021695
ENSMUSG00000040866	MOUSE7_19_PE19	HBG021132
ENSMUSG00000061778	MOUSEX_161_PE6	HBG026139
ENSMUSG00000020116	MOUSE11_18_PE10	HBG027779
ENSMUSG00000033628	MOUSE18_32_PE1	HBG010046
ENSMUSG00000049516	MOUSE7_48_PE22	HBG023111
ENSMUSG00000000278	MOUSE11_92_PE1	HBG002187
ENSMUSG00000073542	MOUSE18_70_PE14	HBG022497
ENSMUSG00000025726	MOUSE7_84_PE3	HBG045079
ENSMUSG00000027219	MOUSE2_124_PE4	HBG045079
ENSMUSG00000042215	MOUSE1_35_PE5	HBG001735
ENSMUSG00000037509	MOUSE1_36_PE19	HBG053360
ENSMUSG00000021990	MOUSE14_61_PE5	HBG053360
ENSMUSG00000027455	MOUSE2_153_PE5	HBG086576
ENSMUSG00000039833	MOUSE5_52_PE1	HBG086576
ENSMUSG00000047539	MOUSE1_188_PE10	HBG008947
ENSMUSG00000021809	MOUSE14_20_PE4	HBG023049
ENSMUSG00000047507	MOUSE17_27_PE9	HBG038577
ENSMUSG00000030302	MOUSE6_114_PE11	HBG056566
ENSMUSG00000026463	MOUSE1_138_PE14	HBG056566
ENSMUSG00000074971	MOUSE2_111_PE7	HBG026376
ENSMUSG00000060152	MOUSE5_119_PE17	HBG059866
ENSMUSG00000069539	MOUSE10_93_PE1	HBG007026
ENSMUSG00000030996	MOUSE7_105_PE35	HBG058522
ENSMUSG00000030217	MOUSE6_137_PE14	HBG058522
ENSMUSG00000070424	MOUSE7_105_PE34	HBG058522
ENSMUSG00000030651	MOUSE7_105_PE10	HBG058522
ENSMUSG00000044308	MOUSE2_70_PE22	HBG054937
ENSMUSG00000042246	MOUSE7_122_PE8	HBG067860
ENSMUSG00000019734	MOUSE7_4_PE9	HBG067860
ENSMUSG00000034330	MOUSE8_123_PE3	HBG026400
ENSMUSG00000034083	MOUSE6_91_PE9	HBG056210
ENSMUSG00000002319	MOUSE14_56_PE23	HBG057822
ENSMUSG00000021411	MOUSE13_36_PE15	HBG026061
ENSMUSG00000073791	MOUSE4_102_PE6	HBG048863
ENSMUSG00000015365	MOUSE15_92_PE10	HBG058406
ENSMUSG00000028820	MOUSE4_130_PE17	HBG039104
ENSMUSG00000021938	MOUSE14_57_PE13	HBG039104
ENSMUSG00000031311	MOUSEX_98_PE17	HBG039104
ENSMUSG00000025439	MOUSE7_101_PE9	HBG029824
ENSMUSG00000074738	MOUSE2_151_PE2	HBG029824
ENSMUSG00000059586	MOUSE15_62_PE8	HBG064423
ENSMUSG00000047734	MOUSE14_65_PE3	HBG064423
ENSMUSG00000026095	MOUSE1_55_PE17	HBG001798
ENSMUSG00000032590	MOUSE9_112_PE43	HBG030989
ENSMUSG00000042390	MOUSE3_93_PE29	HBG077405
ENSMUSG00000025521	MOUSE8_69_PE4	HBG037521
ENSMUSG00000047793	MOUSE1_97_PE27	HBG044224
ENSMUSG00000003226	MOUSE10_60_PE14	HBG037286
ENSMUSG00000040396	MOUSE8_10_PE5	HBG004804
ENSMUSG00000042742	MOUSE6_15_PE2	HBG024166
ENSMUSG00000051149	MOUSE2_170_PE8	HBG057202
ENSMUSG00000020636	MOUSE12_30_PE2	HBG008070
ENSMUSG00000068114	MOUSE15_85_PE32	HBG025892
ENSMUSG00000048387	MOUSE12_10_PE4	HBG020419
ENSMUSG00000036078	MOUSE4_43_PE17	HBG025347
ENSMUSG00000035365	MOUSE10_91_PE7	HBG059942
ENSMUSG00000031497	MOUSE8_11_PE2	HBG059297
ENSMUSG00000031286	MOUSE3_88_PE5	HBG081973
ENSMUSG00000035242	MOUSE10_83_PE79	HBG023792
ENSMUSG00000020107	MOUSE10_62_PE6	HBG023035
ENSMUSG00000048696	MOUSE10_83_PE42	HBG082866
ENSMUSG00000074480	MOUSE3_91_PE39	HBG082866
ENSMUSG00000051154	MOUSE2_19_PE9	HBG021760
ENSMUSG00000016664	MOUSE15_87_PE2	HBG059468
ENSMUSG00000027257	MOUSE2_92_PE36	HBG059468
ENSMUSG00000038722	MOUSE5_151_PE4	HBG002704
ENSMUSG00000021918	MOUSE14_31_PE9	HBG022214
ENSMUSG00000027746	MOUSE3_56_PE3	HBG001611
ENSMUSG00000028593	MOUSE4_148_PE17	HBG056968
ENSMUSG00000041735	MOUSE4_148_PE21	HBG056968
ENSMUSG00000070609	MOUSE4_148_PE20	HBG056968
ENSMUSG00000022607	MOUSE15_76_PE9	HBG024329
ENSMUSG00000050370	MOUSE19_35_PE10	HBG022910
ENSMUSG00000021468	MOUSE13_55_PE7	HBG051267
ENSMUSG00000041278	MOUSE11_45_PE15	HBG031682
ENSMUSG00000021140	MOUSE12_85_PE15	HBG072203
ENSMUSG00000054874	MOUSE19_6_PE43	HBG072203
ENSMUSG00000020840	MOUSE11_80_PE4	HBG002861
ENSMUSG00000037750	MOUSE11_81_PE25	HBG078388
ENSMUSG00000046101	MOUSE1_11_PE1	HBG038091
ENSMUSG00000024410	MOUSE18_13_PE6	HBG058806
ENSMUSG00000037049	MOUSE7_109_PE13	HBG029424
ENSMUSG00000037736	MOUSE5_69_PE5	HBG056893
ENSMUSG00000003072	MOUSE10_83_PE21	HBG038882
ENSMUSG00000061143	MOUSE3_54_PE2	HBG025022
ENSMUSG00000050567	MOUSE11_52_PE20	HBG025022
ENSMUSG00000052146	MOUSE17_29_PE14	HBG004404
ENSMUSG00000063427	MOUSE16_22_PE1	HBG004404
ENSMUSG00000034021	MOUSE5_156_PE11	HBG057611
ENSMUSG00000029202	MOUSE5_68_PE3	HBG057611
ENSMUSG00000063019	MOUSE2_159_PE14	HBG037921
ENSMUSG00000074656	MOUSE2_156_PE27	HBG047896
ENSMUSG00000052825	MOUSE8_54_PE1	HBG047896
ENSMUSG00000002129	MOUSE11_5_PE7	HBG076120
ENSMUSG00000072553	MOUSE11_92_PE13	HBG040729
ENSMUSG00000046408	MOUSE8_88_PE27	HBG024907
ENSMUSG00000023074	MOUSEX_51_PE3	HBG014290
ENSMUSG00000034121	MOUSE11_90_PE36	HBG055525
ENSMUSG00000022358	MOUSE15_61_PE9	HBG026587
ENSMUSG00000038365	MOUSE8_15_PE4	HBG026587
ENSMUSG00000057411	MOUSE17_27_PE35	HBG038579
ENSMUSG00000021958	MOUSE14_64_PE15	HBG071860
ENSMUSG00000030347	MOUSE6_127_PE9	HBG033515
ENSMUSG00000006392	MOUSE4_121_PE27	HBG050484
ENSMUSG00000045662	MOUSE3_112_PE17	HBG023854
ENSMUSG00000042719	MOUSE5_125_PE23	HBG020941
ENSMUSG00000061244	MOUSE14_49_PE4	HBG000784
ENSMUSG00000014767	MOUSE17_17_PE7	HBG021405
ENSMUSG00000061809	MOUSE2_25_PE2	HBG021405
ENSMUSG00000041774	MOUSE16_18_PE16	HBG020990
ENSMUSG00000034321	MOUSE19_43_PE11	HBG003640
ENSMUSG00000036376	MOUSE13_25_PE10	HBG032851
ENSMUSG00000015647	MOUSE2_183_PE5	HBG020183
ENSMUSG00000041231	MOUSE11_46_PE2	HBG012694
ENSMUSG00000063778	MOUSE3_8_PE2	HBG012694
ENSMUSG00000022829	MOUSE16_39_PE14	HBG057798
ENSMUSG00000027828	MOUSE3_67_PE6	HBG002461
ENSMUSG00000040760	MOUSE14_27_PE1	HBG022171
ENSMUSG00000020263	MOUSE10_86_PE9	HBG022171
ENSMUSG00000022191	MOUSE15_14_PE3	HBG003221
ENSMUSG00000041268	MOUSE9_57_PE1	HBG001796
ENSMUSG00000027709	MOUSE3_38_PE3	HBG057908
ENSMUSG00000024892	MOUSE19_5_PE37	HBG057908
ENSMUSG00000068874	MOUSE3_98_PE5	HBG033726
ENSMUSG00000068877	MOUSE3_97_PE25	HBG033726
ENSMUSG00000040506	MOUSE2_93_PE3	HBG037638
ENSMUSG00000014504	MOUSE18_36_PE8	HBG000671
ENSMUSG00000001054	MOUSE11_54_PE6	HBG003764
ENSMUSG00000042694	MOUSE19_49_PE3	HBG022846
ENSMUSG00000035476	MOUSEX_82_PE2	HBG022393
ENSMUSG00000015755	MOUSE10_8_PE16	HBG022393
ENSMUSG00000063200	MOUSE13_45_PE7	HBG058408
ENSMUSG00000003865	MOUSE7_46_PE67	HBG000210
ENSMUSG00000030244	MOUSE6_143_PE9	HBG000210
ENSMUSG00000022702	MOUSE16_20_PE6	HBG001822
ENSMUSG00000029407	MOUSE5_96_PE10	HBG000566
ENSMUSG00000044378	MOUSE6_138_PE8	HBG025728
ENSMUSG00000022756	MOUSE16_18_PE35	HBG020076
ENSMUSG00000031596	MOUSE8_43_PE10	HBG020076
ENSMUSG00000029502	MOUSE5_114_PE7	HBG020865
ENSMUSG00000032051	MOUSE9_54_PE3	HBG082868
ENSMUSG00000026694	MOUSE1_168_PE5	HBG004520
ENSMUSG00000038736	MOUSE15_47_PE1	HBG057735
ENSMUSG00000014873	MOUSE2_28_PE4	HBG045940
ENSMUSG00000026683	MOUSE1_175_PE2	HBG024030
ENSMUSG00000030059	MOUSE6_97_PE2	HBG037805
ENSMUSG00000033545	MOUSE8_117_PE1	HBG038505
ENSMUSG00000031652	MOUSE8_91_PE7	HBG059007
ENSMUSG00000022664	MOUSE16_47_PE17	HBG025211
ENSMUSG00000019899	MOUSE10_28_PE3	HBG058226
ENSMUSG00000038909	MOUSE11_98_PE18	HBG014413
ENSMUSG00000030801	MOUSE7_132_PE8	HBG014413
ENSMUSG00000026571	MOUSE1_171_PE6	HBG023828
ENSMUSG00000002808	MOUSE13_21_PE1	HBG042158
ENSMUSG00000020311	MOUSE11_32_PE7	HBG014365
ENSMUSG00000053302	MOUSE12_85_PE2	HBG055377
ENSMUSG00000020120	MOUSE11_18_PE2	HBG019542
ENSMUSG00000021118	MOUSE12_82_PE7	HBG019542
ENSMUSG00000049950	MOUSE2_4_PE6	HBG071779
ENSMUSG00000035620	MOUSE10_88_PE4	HBG058550
ENSMUSG00000025485	MOUSE7_145_PE21	HBG058550
ENSMUSG00000021548	MOUSE13_89_PE1	HBG028895
ENSMUSG00000033578	MOUSEX_130_PE12	HBG025915
ENSMUSG00000020638	MOUSE12_28_PE4	HBG047963
ENSMUSG00000015766	MOUSE6_138_PE4	HBG089300
ENSMUSG00000024622	MOUSE18_64_PE15	HBG025106
ENSMUSG00000004018	MOUSE11_28_PE2	HBG037301
ENSMUSG00000024963	MOUSE19_8_PE16	HBG081747
ENSMUSG00000045817	MOUSE17_87_PE10	HBG070875
ENSMUSG00000029551	MOUSE5_145_PE22	HBG022724
ENSMUSG00000047656	MOUSE19_8_PE18	HBG023164
ENSMUSG00000018442	MOUSE11_74_PE8	HBG050661
ENSMUSG00000029363	MOUSE5_121_PE8	HBG003806
ENSMUSG00000022881	MOUSE16_24_PE13	HBG003806
ENSMUSG00000023104	MOUSE5_140_PE2	HBG003806
ENSMUSG00000035325	MOUSE5_104_PE4	HBG003474
ENSMUSG00000021461	MOUSE13_66_PE3	HBG059158
ENSMUSG00000042992	MOUSE6_135_PE5	HBG025088
ENSMUSG00000036112	MOUSE10_96_PE14	HBG000561
ENSMUSG00000028680	MOUSE4_120_PE21	HBG072856
ENSMUSG00000030867	MOUSE7_126_PE7	HBG072856
ENSMUSG00000048794	MOUSE6_90_PE5	HBG071150
ENSMUSG00000042485	MOUSE14_31_PE4	HBG072045
ENSMUSG00000050904	MOUSE19_14_PE6	HBG060997
ENSMUSG00000019763	MOUSE10_7_PE3	HBG060997
ENSMUSG00000047084	MOUSE7_83_PE8	HBG021985
ENSMUSG00000026668	MOUSE2_5_PE11	HBG025677
ENSMUSG00000059743	MOUSE3_92_PE11	HBG005367
ENSMUSG00000074653	MOUSE3_32_PE9	HBG021769
ENSMUSG00000031951	MOUSE8_117_PE11	HBG038502
ENSMUSG00000029190	MOUSE5_39_PE5	HBG024824
ENSMUSG00000027357	MOUSE2_134_PE15	HBG058557
ENSMUSG00000059772	MOUSE7_130_PE29	HBG007082
ENSMUSG00000066181	MOUSE2_67_PE3	HBG085701
ENSMUSG00000057748	MOUSE15_85_PE12	HBG085701
ENSMUSG00000039928	MOUSE1_161_PE15	HBG085701
ENSMUSG00000062997	MOUSE2_40_PE8	HBG085701
ENSMUSG00000069439	MOUSE18_22_PE6	HBG085701
ENSMUSG00000041966	MOUSE2_72_PE7	HBG059317
ENSMUSG00000021895	MOUSE14_27_PE4	HBG050389
ENSMUSG00000005505	MOUSE2_92_PE10	HBG020599
ENSMUSG00000026941	MOUSE2_26_PE51	HBG057857
ENSMUSG00000066148	MOUSE4_64_PE7	HBG004197
ENSMUSG00000023984	MOUSE17_49_PE23	HBG089307
ENSMUSG00000020020	MOUSE10_96_PE13	HBG089307
ENSMUSG00000053483	MOUSE1_177_PE26	HBG089307
ENSMUSG00000000673	MOUSE17_87_PE9	HBG019683
ENSMUSG00000027933	MOUSE3_93_PE33	HBG002868
ENSMUSG00000024713	MOUSE19_18_PE11	HBG058136
ENSMUSG00000026718	MOUSE2_15_PE1	HBG016056
ENSMUSG00000055371	MOUSE2_53_PE3	HBG016056
ENSMUSG00000063439	MOUSE7_26_PE38	HBG059594
ENSMUSG00000020608	MOUSE12_12_PE5	HBG076651
ENSMUSG00000020863	MOUSE11_97_PE17	HBG056341
ENSMUSG00000032719	MOUSE1_17_PE4	HBG077802
ENSMUSG00000050079	MOUSE8_99_PE20	HBG005292
ENSMUSG00000053799	MOUSE19_38_PE12	HBG037585
ENSMUSG00000033769	MOUSE6_84_PE2	HBG037585
ENSMUSG00000001380	MOUSE18_39_PE4	HBG004403
ENSMUSG00000019143	MOUSE18_39_PE5	HBG004403
ENSMUSG00000022181	MOUSE15_5_PE4	HBG057616
ENSMUSG00000026478	MOUSE1_158_PE4	HBG058764
ENSMUSG00000026840	MOUSE2_33_PE5	HBG058764
ENSMUSG00000037486	MOUSE12_4_PE8	HBG019776
ENSMUSG00000024160	MOUSE17_26_PE59	HBG022758
ENSMUSG00000033931	MOUSE8_132_PE8	HBG038426
ENSMUSG00000022704	MOUSE16_46_PE6	HBG034441
ENSMUSG00000029098	MOUSE5_38_PE3	HBG003408
ENSMUSG00000020526	MOUSE11_87_PE22	HBG059683
ENSMUSG00000028322	MOUSE4_46_PE14	HBG082158
ENSMUSG00000024847	MOUSE19_5_PE12	HBG087606
ENSMUSG00000040554	MOUSE11_75_PE1	HBG087606
ENSMUSG00000021000	MOUSE12_62_PE9	HBG057277
ENSMUSG00000041420	MOUSE7_16_PE13	HBG056437
ENSMUSG00000035934	MOUSE9_39_PE3	HBG056437
ENSMUSG00000006705	MOUSE17_33_PE26	HBG056437
ENSMUSG00000035495	MOUSE4_47_PE12	HBG025332
ENSMUSG00000025981	MOUSE1_57_PE9	HBG026580
ENSMUSG00000034371	MOUSE19_11_PE29	HBG018925
ENSMUSG00000023921	MOUSE17_43_PE6	HBG022339
ENSMUSG00000024827	MOUSE19_31_PE6	HBG015649
ENSMUSG00000074736	MOUSE2_151_PE5	HBG020155
ENSMUSG00000026866	MOUSE2_44_PE1	HBG036999
ENSMUSG00000042487	MOUSE9_78_PE15	HBG051916
ENSMUSG00000046179	MOUSE7_50_PE9	HBG058988
ENSMUSG00000059263	MOUSE7_115_PE2	HBG020534
ENSMUSG00000056494	MOUSE4_20_PE3	HBG090903
ENSMUSG00000049439	MOUSE1_63_PE1	HBG024889
ENSMUSG00000049329	MOUSEX_153_PE1	HBG001112
ENSMUSG00000061838	MOUSE6_95_PE1	HBG001112
ENSMUSG00000022110	MOUSE14_74_PE8	HBG001112
ENSMUSG00000013878	MOUSE8_28_PE22	HBG022965
ENSMUSG00000045149	MOUSE7_27_PE2	HBG022965
ENSMUSG00000039735	MOUSE3_126_PE3	HBG026409
ENSMUSG00000025979	MOUSE1_57_PE13	HBG050820
ENSMUSG00000009995	MOUSEX_72_PE12	HBG003581
ENSMUSG00000035105	MOUSE12_56_PE3	HBG042593
ENSMUSG00000058709	MOUSE7_28_PE2	HBG042593
ENSMUSG00000028158	MOUSE3_142_PE5	HBG038208
ENSMUSG00000021362	MOUSE13_43_PE11	HBG023091
ENSMUSG00000047694	MOUSEX_96_PE1	HBG019158
ENSMUSG00000027706	MOUSE3_32_PE11	HBG005723
ENSMUSG00000028657	MOUSE4_126_PE3	HBG002728
ENSMUSG00000030291	MOUSE6_147_PE7	HBG007076
ENSMUSG00000006373	MOUSEX_34_PE4	HBG066906
ENSMUSG00000060419	MOUSE5_134_PE5	HBG005342
ENSMUSG00000037563	MOUSE7_29_PE17	HBG005342
ENSMUSG00000062458	MOUSE8_11_PE4	HBG005342
ENSMUSG00000033543	MOUSE9_73_PE4	HBG004502
ENSMUSG00000039480	MOUSE10_35_PE17	HBG057717
ENSMUSG00000028811	MOUSE4_133_PE12	HBG001989
ENSMUSG00000074345	MOUSE9_56_PE11	HBG007417
ENSMUSG00000044469	MOUSE17_58_PE26	HBG007417
ENSMUSG00000032118	MOUSE9_39_PE1	HBG002349
ENSMUSG00000036099	MOUSE10_97_PE1	HBG058665
ENSMUSG00000030584	MOUSE7_30_PE21	HBG079292
ENSMUSG00000000339	MOUSE3_120_PE1	HBG075552
ENSMUSG00000034110	MOUSE5_135_PE17	HBG026031
ENSMUSG00000071050	MOUSE8_90_PE14	HBG026031
ENSMUSG00000049285	MOUSE5_143_PE55	HBG022688
ENSMUSG00000057181	MOUSE11_83_PE17	HBG084977
ENSMUSG00000024853	MOUSE19_6_PE13	HBG001958
ENSMUSG00000026313	MOUSE1_96_PE9	HBG086985
ENSMUSG00000027263	MOUSE2_122_PE36	HBG005393
ENSMUSG00000022721	MOUSE16_19_PE23	HBG061668
ENSMUSG00000067369	MOUSEX_130_PE10	HBG061668
ENSMUSG00000039873	MOUSE2_167_PE15	HBG009453
ENSMUSG00000032078	MOUSE9_48_PE20	HBG041719
ENSMUSG00000039523	MOUSE4_157_PE5	HBG009795
ENSMUSG00000071642	MOUSE16_16_PE2	HBG056995
ENSMUSG00000051285	MOUSE1_8_PE1	HBG056995
ENSMUSG00000071032	MOUSE17_95_PE3	HBG056995
ENSMUSG00000027589	MOUSE2_184_PE42	HBG056995
ENSMUSG00000046318	MOUSE18_69_PE8	HBG037742
ENSMUSG00000044948	MOUSE19_49_PE13	HBG061730
ENSMUSG00000027203	MOUSE2_126_PE11	HBG050132
ENSMUSG00000025907	MOUSE1_7_PE3	HBG020343
ENSMUSG00000041406	MOUSE1_170_PE2	HBG061351
ENSMUSG00000026496	MOUSE1_186_PE15	HBG056318
ENSMUSG00000000127	MOUSE17_67_PE1	HBG021971
ENSMUSG00000053158	MOUSE7_83_PE19	HBG021971
ENSMUSG00000035278	MOUSE10_83_PE74	HBG024988
ENSMUSG00000042105	MOUSE7_132_PE37	HBG022864
ENSMUSG00000034032	MOUSE2_121_PE14	HBG019438
ENSMUSG00000037461	MOUSE1_197_PE21	HBG002106
ENSMUSG00000035310	MOUSE5_104_PE5	HBG011933
ENSMUSG00000047775	MOUSE2_70_PE21	HBG023287
ENSMUSG00000050592	MOUSE2_33_PE8	HBG023952
ENSMUSG00000027534	MOUSE3_11_PE12	HBG020435
ENSMUSG00000025758	MOUSE3_43_PE1	HBG020847
ENSMUSG00000037720	MOUSE5_69_PE7	HBG010016
ENSMUSG00000029624	MOUSE5_151_PE5	HBG022701
ENSMUSG00000066442	MOUSE9_92_PE14	HBG003451
ENSMUSG00000022214	MOUSE14_56_PE12	HBG032986
ENSMUSG00000055197	MOUSE1_77_PE1	HBG023404
ENSMUSG00000004880	MOUSE1_188_PE3	HBG078768
ENSMUSG00000024799	MOUSE19_7_PE8	HBG078768
ENSMUSG00000058454	MOUSE7_148_PE17	HBG078768
ENSMUSG00000030095	MOUSE6_91_PE3	HBG022244
ENSMUSG00000027324	MOUSE2_120_PE19	HBG028468
ENSMUSG00000043099	MOUSE11_78_PE15	HBG021351
ENSMUSG00000050240	MOUSE16_18_PE19	HBG021351
ENSMUSG00000010307	MOUSE7_48_PE23	HBG061503
ENSMUSG00000045282	MOUSE7_5_PE11	HBG061503
ENSMUSG00000022615	MOUSE15_93_PE9	HBG058619
ENSMUSG00000041506	MOUSE9_110_PE27	HBG022182
ENSMUSG00000029012	MOUSE5_23_PE4	HBG010695
ENSMUSG00000036983	MOUSE17_4_PE7	HBG003907
ENSMUSG00000038564	MOUSE5_33_PE38	HBG000812
ENSMUSG00000045854	MOUSE4_34_PE6	HBG072525
ENSMUSG00000028426	MOUSE4_57_PE6	HBG028009
ENSMUSG00000003813	MOUSE8_89_PE24	HBG028009
ENSMUSG00000028577	MOUSE4_96_PE4	HBG001924
ENSMUSG00000036270	MOUSE8_110_PE52	HBG021046
ENSMUSG00000051329	MOUSE2_91_PE25	HBG020606
ENSMUSG00000023918	MOUSE17_44_PE8	HBG074418
ENSMUSG00000057899	MOUSE17_44_PE9	HBG074418
ENSMUSG00000041293	MOUSE17_45_PE2	HBG074418
ENSMUSG00000014349	MOUSE11_99_PE6	HBG021427
ENSMUSG00000002768	MOUSE17_48_PE38	HBG022295
ENSMUSG00000057405	MOUSE4_38_PE1	HBG002022
ENSMUSG00000047242	MOUSEX_103_PE9	HBG002022
ENSMUSG00000053333	MOUSE1_91_PE1	HBG075639
ENSMUSG00000020697	MOUSE11_85_PE13	HBG011465
ENSMUSG00000014529	MOUSE5_4_PE12	HBG062659
ENSMUSG00000050017	MOUSE5_115_PE5	HBG057145
ENSMUSG00000017781	MOUSE11_78_PE35	HBG057145
ENSMUSG00000058441	MOUSE15_92_PE12	HBG024640
ENSMUSG00000058704	MOUSE17_77_PE6	HBG009905
ENSMUSG00000022544	MOUSE16_6_PE9	HBG048917
ENSMUSG00000035984	MOUSE18_36_PE15	HBG015423
ENSMUSG00000032478	MOUSE9_114_PE8	HBG015423
ENSMUSG00000070901	MOUSE4_93_PE5	HBG015423
ENSMUSG00000030747	MOUSE7_102_PE9	HBG067566
ENSMUSG00000052396	MOUSE7_102_PE10	HBG067566
ENSMUSG00000026174	MOUSE1_76_PE19	HBG056364
ENSMUSG00000015994	MOUSE8_28_PE19	HBG008756
ENSMUSG00000043467	MOUSE1_166_PE10	HBG095887
ENSMUSG00000068966	MOUSE2_34_PE22	HBG095887
ENSMUSG00000063550	MOUSE7_105_PE37	HBG057524
ENSMUSG00000025534	MOUSE5_135_PE12	HBG008787
ENSMUSG00000033102	MOUSE13_67_PE7	HBG057987
ENSMUSG00000035011	MOUSE10_84_PE14	HBG057252
ENSMUSG00000028042	MOUSE3_92_PE39	HBG057252
ENSMUSG00000000776	MOUSE14_71_PE6	HBG025317
ENSMUSG00000020260	MOUSE10_80_PE6	HBG000159
ENSMUSG00000037709	MOUSE6_59_PE10	HBG079070
ENSMUSG00000036501	MOUSE18_36_PE13	HBG079070
ENSMUSG00000029063	MOUSE4_159_PE7	HBG085176
ENSMUSG00000024312	MOUSE17_36_PE14	HBG001378
ENSMUSG00000029998	MOUSE6_85_PE22	HBG019753
ENSMUSG00000026468	MOUSE1_160_PE11	HBG078251
ENSMUSG00000038765	MOUSE2_35_PE1	HBG078251
ENSMUSG00000000247	MOUSE2_39_PE15	HBG078251
ENSMUSG00000049744	MOUSE2_44_PE4	HBG067671
ENSMUSG00000030091	MOUSE6_90_PE17	HBG022243
ENSMUSG00000033983	MOUSE11_92_PE7	HBG085029
ENSMUSG00000028274	MOUSE4_35_PE1	HBG005758
ENSMUSG00000028300	MOUSE4_36_PE18	HBG025248
ENSMUSG00000020419	MOUSE11_5_PE14	HBG020964
ENSMUSG00000044358	MOUSE6_14_PE2	HBG020964
ENSMUSG00000028109	MOUSE3_98_PE41	HBG020964
ENSMUSG00000035184	MOUSE14_63_PE4	HBG041014
ENSMUSG00000043230	MOUSE1_82_PE2	HBG041014
ENSMUSG00000037325	MOUSE3_38_PE13	HBG001646
ENSMUSG00000057969	MOUSE9_112_PE16	HBG071390
ENSMUSG00000040254	MOUSE5_13_PE2	HBG071390
ENSMUSG00000063531	MOUSE5_15_PE4	HBG071390
ENSMUSG00000021904	MOUSE14_31_PE28	HBG071390
ENSMUSG00000028780	MOUSE5_18_PE4	HBG071390
ENSMUSG00000026121	MOUSE1_38_PE17	HBG071390
ENSMUSG00000038264	MOUSE9_60_PE22	HBG071390
ENSMUSG00000037089	MOUSE17_47_PE15	HBG001227
ENSMUSG00000020873	MOUSE11_98_PE20	HBG001227
ENSMUSG00000066152	MOUSE4_64_PE1	HBG040592
ENSMUSG00000030451	MOUSE7_58_PE6	HBG004579
ENSMUSG00000015451	MOUSE17_37_PE5	HBG037389
ENSMUSG00000073418	MOUSE17_37_PE1	HBG037389
ENSMUSG00000049577	MOUSE8_127_PE16	HBG021041
ENSMUSG00000046471	MOUSEX_133_PE20	HBG081587
ENSMUSG00000074806	MOUSE2_130_PE14	HBG081587
ENSMUSG00000028847	MOUSE4_129_PE18	HBG002836
ENSMUSG00000031024	MOUSE7_113_PE3	HBG092667
ENSMUSG00000007379	MOUSE3_106_PE11	HBG092667
ENSMUSG00000002668	MOUSE17_59_PE48	HBG092667
ENSMUSG00000035392	MOUSE2_39_PE12	HBG092667
ENSMUSG00000066197	MOUSE7_123_PE1	HBG023714
ENSMUSG00000071113	MOUSE8_36_PE14	HBG022947
ENSMUSG00000027751	MOUSE3_57_PE2	HBG019969
ENSMUSG00000014778	MOUSE8_110_PE21	HBG071087
ENSMUSG00000019831	MOUSE10_42_PE14	HBG074547
ENSMUSG00000030528	MOUSE7_83_PE22	HBG039940
ENSMUSG00000030243	MOUSE6_143_PE6	HBG039940
ENSMUSG00000049774	MOUSE13_64_PE3	HBG079360
ENSMUSG00000059511	MOUSE19_16_PE2	HBG079360
ENSMUSG00000042682	MOUSE14_30_PE2	HBG079360
ENSMUSG00000029647	MOUSE5_153_PE11	HBG005965
ENSMUSG00000068882	MOUSE2_70_PE18	HBG005517
ENSMUSG00000024146	MOUSE17_91_PE3	HBG008330
ENSMUSG00000043518	MOUSEX_158_PE1	HBG019443
ENSMUSG00000050714	MOUSE2_39_PE3	HBG019831
ENSMUSG00000049823	MOUSE17_37_PE14	HBG019831
ENSMUSG00000051855	MOUSE6_32_PE17	HBG024226
ENSMUSG00000055003	MOUSE6_119_PE5	HBG024581
ENSMUSG00000045776	MOUSE14_29_PE2	HBG024581
ENSMUSG00000019054	MOUSE5_142_PE7	HBG029401
ENSMUSG00000071575	MOUSE16_31_PE7	HBG009111
ENSMUSG00000042852	MOUSE4_94_PE1	HBG009111
ENSMUSG00000004096	MOUSE9_15_PE4	HBG009111
ENSMUSG00000047459	MOUSE2_157_PE5	HBG064806
ENSMUSG00000036955	MOUSE10_64_PE24	HBG009667
ENSMUSG00000002812	MOUSE11_63_PE5	HBG005600
ENSMUSG00000003062	MOUSE13_20_PE8	HBG086064
ENSMUSG00000007458	MOUSE6_122_PE8	HBG024550
ENSMUSG00000033335	MOUSE9_22_PE32	HBG089116
ENSMUSG00000025208	MOUSE19_46_PE12	HBG038065
ENSMUSG00000048249	MOUSE17_28_PE17	HBG023929
ENSMUSG00000032512	MOUSE9_124_PE8	HBG004853
ENSMUSG00000038816	MOUSE4_58_PE6	HBG008446
ENSMUSG00000029993	MOUSE6_86_PE10	HBG049454
ENSMUSG00000055471	MOUSE17_75_PE10	HBG019754
ENSMUSG00000027297	MOUSE2_121_PE5	HBG019754
ENSMUSG00000022848	MOUSE16_38_PE1	HBG046526
ENSMUSG00000061631	MOUSE1_67_PE8	HBG005724
ENSMUSG00000058943	MOUSE18_77_PE12	HBG005724
ENSMUSG00000061988	MOUSE13_9_PE9	HBG005724
ENSMUSG00000037805	MOUSE17_30_PE19	HBG005724
ENSMUSG00000026887	MOUSE2_37_PE16	HBG040628
ENSMUSG00000019979	MOUSE10_94_PE1	HBG024474
ENSMUSG00000006567	MOUSE8_24_PE1	HBG026321
ENSMUSG00000033792	MOUSEX_103_PE6	HBG026321
ENSMUSG00000045091	MOUSE1_97_PE21	HBG024015
ENSMUSG00000040297	MOUSE1_167_PE13	HBG057710
ENSMUSG00000027004	MOUSE2_81_PE7	HBG025655
ENSMUSG00000039414	MOUSE17_82_PE5	HBG019670
ENSMUSG00000035181	MOUSE12_54_PE5	HBG019670
ENSMUSG00000020827	MOUSE11_73_PE69	HBG035471
ENSMUSG00000048000	MOUSE1_91_PE16	HBG078404
ENSMUSG00000054435	MOUSE6_49_PE18	HBG089325
ENSMUSG00000039264	MOUSE6_49_PE24	HBG089325
ENSMUSG00000043505	MOUSE6_49_PE23	HBG089325
ENSMUSG00000044867	MOUSE6_49_PE22	HBG089325
ENSMUSG00000047867	MOUSE6_49_PE20	HBG089325
ENSMUSG00000043931	MOUSE6_49_PE21	HBG089325
ENSMUSG00000051124	MOUSE6_49_PE17	HBG089325
ENSMUSG00000049119	MOUSE4_6_PE1	HBG056626
ENSMUSG00000027459	MOUSE2_153_PE19	HBG056626
ENSMUSG00000050105	MOUSE4_138_PE4	HBG056626
ENSMUSG00000036435	MOUSE5_80_PE14	HBG003619
ENSMUSG00000021539	MOUSE13_59_PE5	HBG090288
ENSMUSG00000020305	MOUSE11_32_PE8	HBG069377
ENSMUSG00000028248	MOUSE4_23_PE8	HBG025542
ENSMUSG00000033845	MOUSE1_5_PE3	HBG053787
ENSMUSG00000039713	MOUSE4_155_PE11	HBG020725
ENSMUSG00000041062	MOUSE17_27_PE30	HBG040467
ENSMUSG00000031072	MOUSE7_149_PE14	HBG023197
ENSMUSG00000045795	MOUSE7_84_PE12	HBG021976
ENSMUSG00000022791	MOUSE16_34_PE20	HBG025868
ENSMUSG00000048170	MOUSE7_132_PE40	HBG022863
ENSMUSG00000007038	MOUSE17_37_PE19	HBG022367
ENSMUSG00000029464	MOUSE5_126_PE18	HBG007129
ENSMUSG00000028848	MOUSE4_137_PE17	HBG007129
ENSMUSG00000057236	MOUSE4_133_PE16	HBG050222
ENSMUSG00000031353	MOUSEX_159_PE3	HBG050222
ENSMUSG00000022889	MOUSE16_88_PE1	HBG001762
ENSMUSG00000028556	MOUSE4_101_PE12	HBG052905
ENSMUSG00000032198	MOUSE9_23_PE4	HBG052905
ENSMUSG00000052085	MOUSE19_26_PE1	HBG052905
ENSMUSG00000031093	MOUSEX_33_PE4	HBG052905
ENSMUSG00000038608	MOUSE1_82_PE5	HBG052905
ENSMUSG00000027015	MOUSE2_72_PE8	HBG023146
ENSMUSG00000052105	MOUSE17_69_PE18	HBG080232
ENSMUSG00000055485	MOUSE2_159_PE4	HBG080232
ENSMUSG00000031819	MOUSE8_126_PE6	HBG060601
ENSMUSG00000022217	MOUSE14_56_PE15	HBG060601
ENSMUSG00000021373	MOUSE13_49_PE1	HBG020053
ENSMUSG00000004561	MOUSE14_52_PE10	HBG026353
ENSMUSG00000024730	MOUSE19_12_PE13	HBG078761
ENSMUSG00000026239	MOUSE1_90_PE14	HBG005337
ENSMUSG00000052488	MOUSE8_77_PE7	HBG025180
ENSMUSG00000043843	MOUSE7_26_PE19	HBG008962
ENSMUSG00000006958	MOUSE16_21_PE38	HBG021739
ENSMUSG00000021733	MOUSE14_14_PE7	HBG050769
ENSMUSG00000006576	MOUSE1_77_PE45	HBG050769
ENSMUSG00000034951	MOUSE7_125_PE8	HBG038552
ENSMUSG00000024181	MOUSE17_28_PE2	HBG038583
ENSMUSG00000021376	MOUSE13_49_PE7	HBG078476
ENSMUSG00000019802	MOUSE10_44_PE5	HBG002838
ENSMUSG00000043065	MOUSE16_47_PE2	HBG058166
ENSMUSG00000019718	MOUSE12_75_PE6	HBG038645
ENSMUSG00000038248	MOUSE10_44_PE8	HBG025530
ENSMUSG00000030611	MOUSE7_81_PE5	HBG033629
ENSMUSG00000024735	MOUSE19_12_PE5	HBG004660
ENSMUSG00000062761	MOUSE5_33_PE43	HBG057807
ENSMUSG00000046441	MOUSE8_115_PE15	HBG021117
ENSMUSG00000025873	MOUSE13_57_PE11	HBG000247
ENSMUSG00000038462	MOUSE13_32_PE4	HBG005519
ENSMUSG00000026784	MOUSE2_24_PE1	HBG080291
ENSMUSG00000059355	MOUSE8_89_PE52	HBG081376
ENSMUSG00000058793	MOUSE2_134_PE1	HBG016298
ENSMUSG00000029330	MOUSE5_105_PE2	HBG016298
ENSMUSG00000025176	MOUSE19_43_PE17	HBG022811
ENSMUSG00000024887	MOUSE19_33_PE2	HBG002173
ENSMUSG00000043017	MOUSE7_17_PE9	HBG050281
ENSMUSG00000028036	MOUSE3_156_PE3	HBG050281
ENSMUSG00000075470	MOUSE15_94_PE1	HBG031752
ENSMUSG00000049562	MOUSE19_6_PE35	HBG056869
ENSMUSG00000045237	MOUSEX_68_PE3	HBG020832
ENSMUSG00000069536	MOUSE10_95_PE1	HBG020832
ENSMUSG00000037370	MOUSE10_25_PE22	HBG020440
ENSMUSG00000039231	MOUSEX_8_PE19	HBG081872
ENSMUSG00000034285	MOUSE11_5_PE27	HBG003856
ENSMUSG00000045019	MOUSE17_59_PE34	HBG047368
ENSMUSG00000044465	MOUSE7_109_PE8	HBG000943
ENSMUSG00000035064	MOUSE7_124_PE20	HBG022596
ENSMUSG00000051232	MOUSE11_81_PE55	HBG021324
ENSMUSG00000037379	MOUSE5_35_PE14	HBG024808
ENSMUSG00000040570	MOUSE5_9_PE17	HBG021483
ENSMUSG00000038290	MOUSE11_78_PE13	HBG076788
ENSMUSG00000039182	MOUSE13_15_PE13	HBG003972
ENSMUSG00000026657	MOUSE2_5_PE3	HBG020105
ENSMUSG00000005142	MOUSE8_89_PE53	HBG001255
ENSMUSG00000036860	MOUSE11_61_PE49	HBG001523
ENSMUSG00000028850	MOUSE4_137_PE16	HBG033234
ENSMUSG00000057778	MOUSE11_76_PE2	HBG083507
ENSMUSG00000074486	MOUSE3_91_PE30	HBG083975
ENSMUSG00000074483	MOUSE3_91_PE31	HBG083975
ENSMUSG00000074489	MOUSE3_91_PE29	HBG083975
ENSMUSG00000020340	MOUSE11_48_PE11	HBG002844
ENSMUSG00000030447	MOUSE7_58_PE2	HBG002844
ENSMUSG00000014959	MOUSE2_71_PE9	HBG022126
ENSMUSG00000032513	MOUSE9_124_PE10	HBG022126
ENSMUSG00000029094	MOUSE5_38_PE11	HBG057409
ENSMUSG00000025083	MOUSE19_58_PE16	HBG057409
ENSMUSG00000061864	MOUSE8_63_PE1	HBG043045
ENSMUSG00000022243	MOUSE15_12_PE3	HBG023307
ENSMUSG00000039838	MOUSE4_154_PE2	HBG023307
ENSMUSG00000001999	MOUSE2_128_PE19	HBG024192
ENSMUSG00000034435	MOUSE12_77_PE1	HBG004482
ENSMUSG00000022753	MOUSE16_60_PE5	HBG004482
ENSMUSG00000041236	MOUSE13_20_PE1	HBG009502
ENSMUSG00000043284	MOUSE11_63_PE13	HBG005917
ENSMUSG00000026740	MOUSE2_19_PE7	HBG058384
ENSMUSG00000009566	MOUSE2_34_PE2	HBG019843
ENSMUSG00000035944	MOUSE15_89_PE8	HBG067961
ENSMUSG00000026827	MOUSE2_57_PE5	HBG055204
ENSMUSG00000001305	MOUSE1_192_PE5	HBG077041
ENSMUSG00000054434	MOUSE5_127_PE16	HBG004795
ENSMUSG00000026270	MOUSE1_97_PE20	HBG026277
ENSMUSG00000031090	MOUSE7_148_PE16	HBG003039
ENSMUSG00000029811	MOUSE6_49_PE31	HBG019347
ENSMUSG00000039215	MOUSE6_49_PE35	HBG019347
ENSMUSG00000029813	MOUSE6_49_PE32	HBG019347
ENSMUSG00000068536	MOUSE6_49_PE34	HBG019347
ENSMUSG00000034023	MOUSE6_113_PE35	HBG047314
ENSMUSG00000022066	MOUSE14_70_PE6	HBG059174
ENSMUSG00000000561	MOUSE3_109_PE13	HBG022591
ENSMUSG00000025785	MOUSE9_127_PE14	HBG043093
ENSMUSG00000020231	MOUSE10_79_PE17	HBG026328
ENSMUSG00000015476	MOUSE17_36_PE71	HBG083617
ENSMUSG00000073013	MOUSE12_79_PE3	HBG086149
ENSMUSG00000025508	MOUSE7_146_PE7	HBG086149
ENSMUSG00000022681	MOUSE16_14_PE13	HBG053266
ENSMUSG00000028958	MOUSE5_25_PE19	HBG021484
ENSMUSG00000037278	MOUSE11_81_PE60	HBG021323
ENSMUSG00000043870	MOUSE16_23_PE12	HBG021323
ENSMUSG00000005262	MOUSE16_20_PE3	HBG003507
ENSMUSG00000026946	MOUSE2_52_PE4	HBG043880
ENSMUSG00000002748	MOUSE5_140_PE28	HBG022657
ENSMUSG00000022018	MOUSE14_80_PE6	HBG040995
ENSMUSG00000048550	MOUSE2_22_PE5	HBG020102
ENSMUSG00000036751	MOUSE7_31_PE51	HBG013723
ENSMUSG00000020022	MOUSE10_97_PE6	HBG002396
ENSMUSG00000028145	MOUSE3_97_PE11	HBG022121
ENSMUSG00000024993	MOUSE19_63_PE4	HBG012970
ENSMUSG00000031592	MOUSE8_43_PE21	HBG022932
ENSMUSG00000013415	MOUSE11_99_PE3	HBG002050
[truncated: 4,844 more rows]

## Sheet: lethal
Ensembl_gene_id
ENSMUSG00000000303
ENSMUSG00000002020
ENSMUSG00000002814
ENSMUSG00000002948
ENSMUSG00000003555
ENSMUSG00000004069
ENSMUSG00000007589
ENSMUSG00000010095
ENSMUSG00000013160
ENSMUSG00000017718
ENSMUSG00000018379
ENSMUSG00000018707
ENSMUSG00000019907
ENSMUSG00000023988
ENSMUSG00000024713
ENSMUSG00000024740
ENSMUSG00000025153
ENSMUSG00000025574
ENSMUSG00000025583
ENSMUSG00000026773
ENSMUSG00000027248
ENSMUSG00000028452
ENSMUSG00000028800
ENSMUSG00000030291
ENSMUSG00000030697
ENSMUSG00000030979
ENSMUSG00000031446
ENSMUSG00000031618
ENSMUSG00000034120
ENSMUSG00000036835
ENSMUSG00000036940
ENSMUSG00000037474
ENSMUSG00000039308
ENSMUSG00000039994
ENSMUSG00000040249
ENSMUSG00000042660
ENSMUSG00000045294
ENSMUSG00000045328
ENSMUSG00000050017
ENSMUSG00000050296
ENSMUSG00000052456
ENSMUSG00000053113
ENSMUSG00000058794
ENSMUSG00000059060
ENSMUSG00000062542
ENSMUSG00000070002
ENSMUSG00000070544
ENSMUSG00000071172
ENSMUSG00000074781
ENSMUSG00000075316

## Sheet: abnormal
Ensembl_gene_id
ENSMUSG00000000058
ENSMUSG00000000085
ENSMUSG00000000142
ENSMUSG00000000157
ENSMUSG00000000182
ENSMUSG00000000183
ENSMUSG00000000216
ENSMUSG00000000275
ENSMUSG00000000276
ENSMUSG00000000305
ENSMUSG00000000308
ENSMUSG00000000317
ENSMUSG00000000318
ENSMUSG00000000320
ENSMUSG00000000326
ENSMUSG00000000365
ENSMUSG00000000381
ENSMUSG00000000409
ENSMUSG00000000531
ENSMUSG00000000562
ENSMUSG00000000568
ENSMUSG00000000594
ENSMUSG00000000617
ENSMUSG00000000690
ENSMUSG00000000706
ENSMUSG00000000731
ENSMUSG00000000732
ENSMUSG00000000738
ENSMUSG00000000766
ENSMUSG00000000782
ENSMUSG00000000791
ENSMUSG00000000794
ENSMUSG00000000817
ENSMUSG00000000826
ENSMUSG00000000838
ENSMUSG00000000901
ENSMUSG00000000938
ENSMUSG00000000982
ENSMUSG00000001029
ENSMUSG00000001103
ENSMUSG00000001119
ENSMUSG00000001128
ENSMUSG00000001131
ENSMUSG00000001157
ENSMUSG00000001249
ENSMUSG00000001270
ENSMUSG00000001281
ENSMUSG00000001348
ENSMUSG00000001349
ENSMUSG00000001435
ENSMUSG00000001444
ENSMUSG00000001506
ENSMUSG00000001508
ENSMUSG00000001558
ENSMUSG00000001622
ENSMUSG00000001627
ENSMUSG00000001642
ENSMUSG00000001657
ENSMUSG00000001661
ENSMUSG00000001741
ENSMUSG00000001750
ENSMUSG00000001751
ENSMUSG00000001773
ENSMUSG00000001865
ENSMUSG00000001930
ENSMUSG00000001946
ENSMUSG00000001964
ENSMUSG00000002007
ENSMUSG00000002033
ENSMUSG00000002058
ENSMUSG00000002083
ENSMUSG00000002100
ENSMUSG00000002103
ENSMUSG00000002108
ENSMUSG00000002109
ENSMUSG00000002190
ENSMUSG00000002233
ENSMUSG00000002265
ENSMUSG00000002325
ENSMUSG00000002341
ENSMUSG00000002393
ENSMUSG00000002588
ENSMUSG00000002664
ENSMUSG00000002731
ENSMUSG00000002769
ENSMUSG00000002844
ENSMUSG00000002885
ENSMUSG00000002897
ENSMUSG00000002908
ENSMUSG00000002930
ENSMUSG00000002944
ENSMUSG00000002980
ENSMUSG00000002983
ENSMUSG00000002985
ENSMUSG00000002997
ENSMUSG00000003037
ENSMUSG00000003070
ENSMUSG00000003123
ENSMUSG00000003131
ENSMUSG00000003184
ENSMUSG00000003206
ENSMUSG00000003228
ENSMUSG00000003341
ENSMUSG00000003352
ENSMUSG00000003378
ENSMUSG00000003379
ENSMUSG00000003420
ENSMUSG00000003476
ENSMUSG00000003500
ENSMUSG00000003534
ENSMUSG00000003545
ENSMUSG00000003573
ENSMUSG00000003585
ENSMUSG00000003617
ENSMUSG00000003657
ENSMUSG00000003849
ENSMUSG00000003882
ENSMUSG00000004054
ENSMUSG00000004070
ENSMUSG00000004113
ENSMUSG00000004151
ENSMUSG00000004187
ENSMUSG00000004231
ENSMUSG00000004296
ENSMUSG00000004317
ENSMUSG00000004366
ENSMUSG00000004455
ENSMUSG00000004508
ENSMUSG00000004552
ENSMUSG00000004609
ENSMUSG00000004707
ENSMUSG00000004709
ENSMUSG00000004730
ENSMUSG00000004791
ENSMUSG00000004798
ENSMUSG00000004814
ENSMUSG00000004837
ENSMUSG00000004885
ENSMUSG00000004947
ENSMUSG00000004948
ENSMUSG00000004952
ENSMUSG00000004988
ENSMUSG00000005054
ENSMUSG00000005057
ENSMUSG00000005087
ENSMUSG00000005089
ENSMUSG00000005125
ENSMUSG00000005142
ENSMUSG00000005161
ENSMUSG00000005220
ENSMUSG00000005320
ENSMUSG00000005339
ENSMUSG00000005355
ENSMUSG00000005357
ENSMUSG00000005360
ENSMUSG00000005364
ENSMUSG00000005370
ENSMUSG00000005373
ENSMUSG00000005397
ENSMUSG00000005465
ENSMUSG00000005493
ENSMUSG00000005540
ENSMUSG00000005553
ENSMUSG00000005611
ENSMUSG00000005677
ENSMUSG00000005681
ENSMUSG00000005696
ENSMUSG00000005716
ENSMUSG00000005763
ENSMUSG00000005800
ENSMUSG00000005824
ENSMUSG00000005883
ENSMUSG00000005886
ENSMUSG00000005891
ENSMUSG00000005892
ENSMUSG00000005893
ENSMUSG00000005947
ENSMUSG00000005952
ENSMUSG00000005958
ENSMUSG00000005980
ENSMUSG00000006007
ENSMUSG00000006014
ENSMUSG00000006269
ENSMUSG00000006344
ENSMUSG00000006345
ENSMUSG00000006435
ENSMUSG00000006445
ENSMUSG00000006457
ENSMUSG00000006458
ENSMUSG00000006542
ENSMUSG00000006576
ENSMUSG00000006724
ENSMUSG00000006731
ENSMUSG00000007035
ENSMUSG00000007480
ENSMUSG00000007617
ENSMUSG00000007655
ENSMUSG00000007682
ENSMUSG00000007783
ENSMUSG00000007891
ENSMUSG00000008136
ENSMUSG00000008892
ENSMUSG00000009246
ENSMUSG00000009350
ENSMUSG00000009394
ENSMUSG00000009406
ENSMUSG00000009545
ENSMUSG00000009596
ENSMUSG00000010054
ENSMUSG00000010066
ENSMUSG00000010067
ENSMUSG00000010142
ENSMUSG00000010342
ENSMUSG00000010592
ENSMUSG00000010660
ENSMUSG00000010760
ENSMUSG00000011171
ENSMUSG00000011349
ENSMUSG00000011751
ENSMUSG00000013033
ENSMUSG00000013089
ENSMUSG00000013698
ENSMUSG00000013846
ENSMUSG00000013973
ENSMUSG00000014158
ENSMUSG00000014609
ENSMUSG00000014668
ENSMUSG00000014776
ENSMUSG00000014850
ENSMUSG00000015001
ENSMUSG00000015027
ENSMUSG00000015090
ENSMUSG00000015112
ENSMUSG00000015217
ENSMUSG00000015312
ENSMUSG00000015316
ENSMUSG00000015340
ENSMUSG00000015355
ENSMUSG00000015396
ENSMUSG00000015401
ENSMUSG00000015405
ENSMUSG00000015437
ENSMUSG00000015474
ENSMUSG00000015501
ENSMUSG00000015627
ENSMUSG00000015721
ENSMUSG00000015806
ENSMUSG00000015829
ENSMUSG00000015837
ENSMUSG00000015854
ENSMUSG00000015889
ENSMUSG00000015947
ENSMUSG00000015950
ENSMUSG00000016024
ENSMUSG00000016194
ENSMUSG00000016206
ENSMUSG00000016255
ENSMUSG00000016493
ENSMUSG00000016494
ENSMUSG00000016496
ENSMUSG00000016498
ENSMUSG00000016524
ENSMUSG00000016528
ENSMUSG00000016529
ENSMUSG00000016756
ENSMUSG00000017002
ENSMUSG00000017009
ENSMUSG00000017057
ENSMUSG00000017165
ENSMUSG00000017167
ENSMUSG00000017195
ENSMUSG00000017311
ENSMUSG00000017316
ENSMUSG00000017466
ENSMUSG00000017493
ENSMUSG00000017652
ENSMUSG00000017688
ENSMUSG00000017724
ENSMUSG00000017737
ENSMUSG00000017754
ENSMUSG00000017756
ENSMUSG00000017760
ENSMUSG00000017969
ENSMUSG00000017978
ENSMUSG00000018012
ENSMUSG00000018167
ENSMUSG00000018168
ENSMUSG00000018199
ENSMUSG00000018238
ENSMUSG00000018334
ENSMUSG00000018340
ENSMUSG00000018341
ENSMUSG00000018411
ENSMUSG00000018428
ENSMUSG00000018500
ENSMUSG00000018554
ENSMUSG00000018566
ENSMUSG00000018574
ENSMUSG00000018581
ENSMUSG00000018589
ENSMUSG00000018593
ENSMUSG00000018620
ENSMUSG00000018634
ENSMUSG00000018654
ENSMUSG00000018752
ENSMUSG00000018765
ENSMUSG00000018800
ENSMUSG00000018819
ENSMUSG00000018909
ENSMUSG00000018920
ENSMUSG00000018924
ENSMUSG00000018932
ENSMUSG00000018983
ENSMUSG00000019027
ENSMUSG00000019055
ENSMUSG00000019230
ENSMUSG00000019303
ENSMUSG00000019326
ENSMUSG00000019433
ENSMUSG00000019461
ENSMUSG00000019577
ENSMUSG00000019772
ENSMUSG00000019779
ENSMUSG00000019787
ENSMUSG00000019795
ENSMUSG00000019828
ENSMUSG00000019842
ENSMUSG00000019865
ENSMUSG00000019890
ENSMUSG00000019893
ENSMUSG00000019894
ENSMUSG00000019929
ENSMUSG00000019932
ENSMUSG00000019970
ENSMUSG00000020009
ENSMUSG00000020038
ENSMUSG00000020044
ENSMUSG00000020048
ENSMUSG00000020059
ENSMUSG00000020077
ENSMUSG00000020085
ENSMUSG00000020091
ENSMUSG00000020098
ENSMUSG00000020099
ENSMUSG00000020108
ENSMUSG00000020123
ENSMUSG00000020125
ENSMUSG00000020143
ENSMUSG00000020151
ENSMUSG00000020155
ENSMUSG00000020178
ENSMUSG00000020186
ENSMUSG00000020193
ENSMUSG00000020205
ENSMUSG00000020216
ENSMUSG00000020227
ENSMUSG00000020230
ENSMUSG00000020272
ENSMUSG00000020279
ENSMUSG00000020287
ENSMUSG00000020325
ENSMUSG00000020326
ENSMUSG00000020330
ENSMUSG00000020331
ENSMUSG00000020354
ENSMUSG00000020377
ENSMUSG00000020383
ENSMUSG00000020395
ENSMUSG00000020396
ENSMUSG00000020399
ENSMUSG00000020402
ENSMUSG00000020407
ENSMUSG00000020423
ENSMUSG00000020427
ENSMUSG00000020428
ENSMUSG00000020429
ENSMUSG00000020431
ENSMUSG00000020447
ENSMUSG00000020451
ENSMUSG00000020474
ENSMUSG00000020476
ENSMUSG00000020486
ENSMUSG00000020573
ENSMUSG00000020583
ENSMUSG00000020591
ENSMUSG00000020592
ENSMUSG00000020598
ENSMUSG00000020599
ENSMUSG00000020623
ENSMUSG00000020635
ENSMUSG00000020651
ENSMUSG00000020654
ENSMUSG00000020660
ENSMUSG00000020676
ENSMUSG00000020704
ENSMUSG00000020717
ENSMUSG00000020722
ENSMUSG00000020752
ENSMUSG00000020758
ENSMUSG00000020777
ENSMUSG00000020785
ENSMUSG00000020788
ENSMUSG00000020793
ENSMUSG00000020826
ENSMUSG00000020838
ENSMUSG00000020847
ENSMUSG00000020865
ENSMUSG00000020866
ENSMUSG00000020868
ENSMUSG00000020875
ENSMUSG00000020884
ENSMUSG00000020886
ENSMUSG00000020890
ENSMUSG00000020893
ENSMUSG00000020907
ENSMUSG00000020912
ENSMUSG00000020926
ENSMUSG00000020932
ENSMUSG00000021033
ENSMUSG00000021055
ENSMUSG00000021108
ENSMUSG00000021123
ENSMUSG00000021124
ENSMUSG00000021125
ENSMUSG00000021180
ENSMUSG00000021190
ENSMUSG00000021214
ENSMUSG00000021314
ENSMUSG00000021322
ENSMUSG00000021342
ENSMUSG00000021356
ENSMUSG00000021360
ENSMUSG00000021363
ENSMUSG00000021365
ENSMUSG00000021376
ENSMUSG00000021390
ENSMUSG00000021423
ENSMUSG00000021451
ENSMUSG00000021461
ENSMUSG00000021469
ENSMUSG00000021478
ENSMUSG00000021485
ENSMUSG00000021499
ENSMUSG00000021538
ENSMUSG00000021539
ENSMUSG00000021559
ENSMUSG00000021575
ENSMUSG00000021583
ENSMUSG00000021585
ENSMUSG00000021591
ENSMUSG00000021594
ENSMUSG00000021604
ENSMUSG00000021609
ENSMUSG00000021612
ENSMUSG00000021622
ENSMUSG00000021624
ENSMUSG00000021629
ENSMUSG00000021638
ENSMUSG00000021647
ENSMUSG00000021665
ENSMUSG00000021668
ENSMUSG00000021675
ENSMUSG00000021678
ENSMUSG00000021680
ENSMUSG00000021686
ENSMUSG00000021694
ENSMUSG00000021701
ENSMUSG00000021719
ENSMUSG00000021721
ENSMUSG00000021730
ENSMUSG00000021733
ENSMUSG00000021743
ENSMUSG00000021745
ENSMUSG00000021789
ENSMUSG00000021795
ENSMUSG00000021803
ENSMUSG00000021804
ENSMUSG00000021816
ENSMUSG00000021822
ENSMUSG00000021886
ENSMUSG00000021948
ENSMUSG00000022025
ENSMUSG00000022037
ENSMUSG00000022039
ENSMUSG00000022040
ENSMUSG00000022054
ENSMUSG00000022055
ENSMUSG00000022061
ENSMUSG00000022074
ENSMUSG00000022076
ENSMUSG00000022090
ENSMUSG00000022091
ENSMUSG00000022096
ENSMUSG00000022097
ENSMUSG00000022099
ENSMUSG00000022101
ENSMUSG00000022102
ENSMUSG00000022103
ENSMUSG00000022111
ENSMUSG00000022125
ENSMUSG00000022131
ENSMUSG00000022136
ENSMUSG00000022148
ENSMUSG00000022178
ENSMUSG00000022194
ENSMUSG00000022203
ENSMUSG00000022216
ENSMUSG00000022219
ENSMUSG00000022221
ENSMUSG00000022225
ENSMUSG00000022227
ENSMUSG00000022229
ENSMUSG00000022244
ENSMUSG00000022265
ENSMUSG00000022292
ENSMUSG00000022372
ENSMUSG00000022376
ENSMUSG00000022383
ENSMUSG00000022415
ENSMUSG00000022421
ENSMUSG00000022428
ENSMUSG00000022429
ENSMUSG00000022432
ENSMUSG00000022435
ENSMUSG00000022454
ENSMUSG00000022456
ENSMUSG00000022471
ENSMUSG00000022479
ENSMUSG00000022489
ENSMUSG00000022490
ENSMUSG00000022501
ENSMUSG00000022514
ENSMUSG00000022519
ENSMUSG00000022523
ENSMUSG00000022548
ENSMUSG00000022555
ENSMUSG00000022579
ENSMUSG00000022594
ENSMUSG00000022615
ENSMUSG00000022619
ENSMUSG00000022620
ENSMUSG00000022622
ENSMUSG00000022637
ENSMUSG00000022650
ENSMUSG00000022656
ENSMUSG00000022659
ENSMUSG00000022661
ENSMUSG00000022672
ENSMUSG00000022678
ENSMUSG00000022681
ENSMUSG00000022687
ENSMUSG00000022762
ENSMUSG00000022779
ENSMUSG00000022780
ENSMUSG00000022809
ENSMUSG00000022831
ENSMUSG00000022836
ENSMUSG00000022840
ENSMUSG00000022843
ENSMUSG00000022847
ENSMUSG00000022868
ENSMUSG00000022878
ENSMUSG00000022885
ENSMUSG00000022894
ENSMUSG00000022901
ENSMUSG00000022935
ENSMUSG00000022951
ENSMUSG00000022965
ENSMUSG00000022967
ENSMUSG00000022969
ENSMUSG00000022982
ENSMUSG00000022991
ENSMUSG00000022996
ENSMUSG00000023000
ENSMUSG00000023017
ENSMUSG00000023045
ENSMUSG00000023047
ENSMUSG00000023057
ENSMUSG00000023070
ENSMUSG00000023073
ENSMUSG00000023078
ENSMUSG00000023087
ENSMUSG00000023088
ENSMUSG00000023132
ENSMUSG00000023206
ENSMUSG00000023216
ENSMUSG00000023259
ENSMUSG00000023274
ENSMUSG00000023279
ENSMUSG00000023443
ENSMUSG00000023572
ENSMUSG00000023828
ENSMUSG00000023829
ENSMUSG00000023845
ENSMUSG00000023868
ENSMUSG00000023905
ENSMUSG00000023915
ENSMUSG00000023953
ENSMUSG00000023979
ENSMUSG00000023982
ENSMUSG00000024013
ENSMUSG00000024014
ENSMUSG00000024027
ENSMUSG00000024028
ENSMUSG00000024029
ENSMUSG00000024030
ENSMUSG00000024032
ENSMUSG00000024041
ENSMUSG00000024068
ENSMUSG00000024079
ENSMUSG00000024087
ENSMUSG00000024098
ENSMUSG00000024107
ENSMUSG00000024112
ENSMUSG00000024132
ENSMUSG00000024151
ENSMUSG00000024190
ENSMUSG00000024211
ENSMUSG00000024232
ENSMUSG00000024235
ENSMUSG00000024254
ENSMUSG00000024261
ENSMUSG00000024300
ENSMUSG00000024308
ENSMUSG00000024325
ENSMUSG00000024330
ENSMUSG00000024334
ENSMUSG00000024337
ENSMUSG00000024338
ENSMUSG00000024366
ENSMUSG00000024391
ENSMUSG00000024399
ENSMUSG00000024402
ENSMUSG00000024406
ENSMUSG00000024411
ENSMUSG00000024456
ENSMUSG00000024462
ENSMUSG00000024497
ENSMUSG00000024511
ENSMUSG00000024521
ENSMUSG00000024526
ENSMUSG00000024539
ENSMUSG00000024552
ENSMUSG00000024553
ENSMUSG00000024610
ENSMUSG00000024617
ENSMUSG00000024619
ENSMUSG00000024653
ENSMUSG00000024673
ENSMUSG00000024680
ENSMUSG00000024734
ENSMUSG00000024743
ENSMUSG00000024772
ENSMUSG00000024778
ENSMUSG00000024781
ENSMUSG00000024798
ENSMUSG00000024803
ENSMUSG00000024837
ENSMUSG00000024842
ENSMUSG00000024863
ENSMUSG00000024867
ENSMUSG00000024883
ENSMUSG00000024887
ENSMUSG00000024906
ENSMUSG00000024907
ENSMUSG00000024913
ENSMUSG00000024914
ENSMUSG00000024921
ENSMUSG00000024922
ENSMUSG00000024935
ENSMUSG00000024940
ENSMUSG00000024942
ENSMUSG00000024952
ENSMUSG00000024955
ENSMUSG00000024957
ENSMUSG00000024959
ENSMUSG00000024962
ENSMUSG00000024975
ENSMUSG00000024978
ENSMUSG00000024979
ENSMUSG00000024990
ENSMUSG00000024998
ENSMUSG00000025006
ENSMUSG00000025017
ENSMUSG00000025025
ENSMUSG00000025044
ENSMUSG00000025056
ENSMUSG00000025077
ENSMUSG00000025081
ENSMUSG00000025105
ENSMUSG00000025132
ENSMUSG00000025139
ENSMUSG00000025163
ENSMUSG00000025172
ENSMUSG00000025175
ENSMUSG00000025194
ENSMUSG00000025215
ENSMUSG00000025217
ENSMUSG00000025221
ENSMUSG00000025225
ENSMUSG00000025229
ENSMUSG00000025232
ENSMUSG00000025239
ENSMUSG00000025269
ENSMUSG00000025333
ENSMUSG00000025350
ENSMUSG00000025355
ENSMUSG00000025357
ENSMUSG00000025380
ENSMUSG00000025401
ENSMUSG00000025408
ENSMUSG00000025479
ENSMUSG00000025494
ENSMUSG00000025496
ENSMUSG00000025498
ENSMUSG00000025503
ENSMUSG00000025509
ENSMUSG00000025510
ENSMUSG00000025515
ENSMUSG00000025579
ENSMUSG00000025582
ENSMUSG00000025584
ENSMUSG00000025586
ENSMUSG00000025588
ENSMUSG00000025656
ENSMUSG00000025701
ENSMUSG00000025743
ENSMUSG00000025746
ENSMUSG00000025757
ENSMUSG00000025779
ENSMUSG00000025784
ENSMUSG00000025804
ENSMUSG00000025813
ENSMUSG00000025855
ENSMUSG00000025887
ENSMUSG00000025888
ENSMUSG00000025889
ENSMUSG00000025892
ENSMUSG00000025900
ENSMUSG00000025905
ENSMUSG00000025912
ENSMUSG00000025915
ENSMUSG00000025969
ENSMUSG00000026009
ENSMUSG00000026011
ENSMUSG00000026012
ENSMUSG00000026024
ENSMUSG00000026062
ENSMUSG00000026065
ENSMUSG00000026068
ENSMUSG00000026070
ENSMUSG00000026072
ENSMUSG00000026080
ENSMUSG00000026094
ENSMUSG00000026098
ENSMUSG00000026100
ENSMUSG00000026110
ENSMUSG00000026114
ENSMUSG00000026147
ENSMUSG00000026170
ENSMUSG00000026173
ENSMUSG00000026175
ENSMUSG00000026177
ENSMUSG00000026180
ENSMUSG00000026182
ENSMUSG00000026185
ENSMUSG00000026204
ENSMUSG00000026208
ENSMUSG00000026235
ENSMUSG00000026237
ENSMUSG00000026249
ENSMUSG00000026259
ENSMUSG00000026270
ENSMUSG00000026272
ENSMUSG00000026285
ENSMUSG00000026288
ENSMUSG00000026343
ENSMUSG00000026358
ENSMUSG00000026360
ENSMUSG00000026384
ENSMUSG00000026387
ENSMUSG00000026389
ENSMUSG00000026390
ENSMUSG00000026399
ENSMUSG00000026417
ENSMUSG00000026420
ENSMUSG00000026430
ENSMUSG00000026432
ENSMUSG00000026436
ENSMUSG00000026447
ENSMUSG00000026457
ENSMUSG00000026463
ENSMUSG00000026527
ENSMUSG00000026542
ENSMUSG00000026567
ENSMUSG00000026574
ENSMUSG00000026580
ENSMUSG00000026581
ENSMUSG00000026587
ENSMUSG00000026600
ENSMUSG00000026609
ENSMUSG00000026616
ENSMUSG00000026628
ENSMUSG00000026637
ENSMUSG00000026648
ENSMUSG00000026663
ENSMUSG00000026673
ENSMUSG00000026674
ENSMUSG00000026700
ENSMUSG00000026728
ENSMUSG00000026764
ENSMUSG00000026770
ENSMUSG00000026778
ENSMUSG00000026782
ENSMUSG00000026817
ENSMUSG00000026818
ENSMUSG00000026820
ENSMUSG00000026821
ENSMUSG00000026822
ENSMUSG00000026824
ENSMUSG00000026832
ENSMUSG00000026833
ENSMUSG00000026875
ENSMUSG00000026880
ENSMUSG00000026893
ENSMUSG00000026896
ENSMUSG00000026928
ENSMUSG00000026944
ENSMUSG00000026971
ENSMUSG00000026980
ENSMUSG00000026981
ENSMUSG00000027015
ENSMUSG00000027048
ENSMUSG00000027073
ENSMUSG00000027102
ENSMUSG00000027120
ENSMUSG00000027168
ENSMUSG00000027187
ENSMUSG00000027208
ENSMUSG00000027239
ENSMUSG00000027296
ENSMUSG00000027301
ENSMUSG00000027316
ENSMUSG00000027322
ENSMUSG00000027330
ENSMUSG00000027335
ENSMUSG00000027338
ENSMUSG00000027347
ENSMUSG00000027351
ENSMUSG00000027360
ENSMUSG00000027368
ENSMUSG00000027400
ENSMUSG00000027419
ENSMUSG00000027420
ENSMUSG00000027435
ENSMUSG00000027447
ENSMUSG00000027470
ENSMUSG00000027488
ENSMUSG00000027490
ENSMUSG00000027508
ENSMUSG00000027540
ENSMUSG00000027544
ENSMUSG00000027559
ENSMUSG00000027577
ENSMUSG00000027582
ENSMUSG00000027612
ENSMUSG00000027643
ENSMUSG00000027678
ENSMUSG00000027698
ENSMUSG00000027720
ENSMUSG00000027737
ENSMUSG00000027744
ENSMUSG00000027748
ENSMUSG00000027750
ENSMUSG00000027763
ENSMUSG00000027765
ENSMUSG00000027776
ENSMUSG00000027793
ENSMUSG00000027804
ENSMUSG00000027805
ENSMUSG00000027820
ENSMUSG00000027827
ENSMUSG00000027832
ENSMUSG00000027834
ENSMUSG00000027843
ENSMUSG00000027855
ENSMUSG00000027861
ENSMUSG00000027887
ENSMUSG00000027907
ENSMUSG00000027938
ENSMUSG00000027985
ENSMUSG00000027997
ENSMUSG00000028003
ENSMUSG00000028004
ENSMUSG00000028019
ENSMUSG00000028024
ENSMUSG00000028031
ENSMUSG00000028044
ENSMUSG00000028047
ENSMUSG00000028064
ENSMUSG00000028071
ENSMUSG00000028076
ENSMUSG00000028102
ENSMUSG00000028111
ENSMUSG00000028124
ENSMUSG00000028125
ENSMUSG00000028137
ENSMUSG00000028138
ENSMUSG00000028150
ENSMUSG00000028159
ENSMUSG00000028161
ENSMUSG00000028164
ENSMUSG00000028174
ENSMUSG00000028185
ENSMUSG00000028186
ENSMUSG00000028207
ENSMUSG00000028211
ENSMUSG00000028217
ENSMUSG00000028222
ENSMUSG00000028235
ENSMUSG00000028238
ENSMUSG00000028245
ENSMUSG00000028255
ENSMUSG00000028259
ENSMUSG00000028280
ENSMUSG00000028289
ENSMUSG00000028298
ENSMUSG00000028339
ENSMUSG00000028354
ENSMUSG00000028356
ENSMUSG00000028362
ENSMUSG00000028370
ENSMUSG00000028399
ENSMUSG00000028410
ENSMUSG00000028427
ENSMUSG00000028435
ENSMUSG00000028453
ENSMUSG00000028459
ENSMUSG00000028460
ENSMUSG00000028463
ENSMUSG00000028467
ENSMUSG00000028469
ENSMUSG00000028494
ENSMUSG00000028518
ENSMUSG00000028519
ENSMUSG00000028538
ENSMUSG00000028546
ENSMUSG00000028550
ENSMUSG00000028551
ENSMUSG00000028602
ENSMUSG00000028603
ENSMUSG00000028631
ENSMUSG00000028634
ENSMUSG00000028657
ENSMUSG00000028664
ENSMUSG00000028675
ENSMUSG00000028687
ENSMUSG00000028691
ENSMUSG00000028702
ENSMUSG00000028715
ENSMUSG00000028738
ENSMUSG00000028747
ENSMUSG00000028756
ENSMUSG00000028773
ENSMUSG00000028777
ENSMUSG00000028785
ENSMUSG00000028859
ENSMUSG00000028874
ENSMUSG00000028931
ENSMUSG00000028950
ENSMUSG00000028957
ENSMUSG00000028964
ENSMUSG00000028965
ENSMUSG00000028970
ENSMUSG00000028974
ENSMUSG00000028980
ENSMUSG00000028996
ENSMUSG00000029009
ENSMUSG00000029015
ENSMUSG00000029016
ENSMUSG00000029019
ENSMUSG00000029027
ENSMUSG00000029060
ENSMUSG00000029072
ENSMUSG00000029082
ENSMUSG00000029084
ENSMUSG00000029102
ENSMUSG00000029121
ENSMUSG00000029156
ENSMUSG00000029193
ENSMUSG00000029195
ENSMUSG00000029204
ENSMUSG00000029205
ENSMUSG00000029211
ENSMUSG00000029217
ENSMUSG00000029236
ENSMUSG00000029238
ENSMUSG00000029272
ENSMUSG00000029275
ENSMUSG00000029288
ENSMUSG00000029304
ENSMUSG00000029334
ENSMUSG00000029335
ENSMUSG00000029337
ENSMUSG00000029344
ENSMUSG00000029361
ENSMUSG00000029373
ENSMUSG00000029375
ENSMUSG00000029378
ENSMUSG00000029380
ENSMUSG00000029417
ENSMUSG00000029426
ENSMUSG00000029455
ENSMUSG00000029470
ENSMUSG00000029471
ENSMUSG00000029491
ENSMUSG00000029521
ENSMUSG00000029522
ENSMUSG00000029530
ENSMUSG00000029552
ENSMUSG00000029570
ENSMUSG00000029613
ENSMUSG00000029674
ENSMUSG00000029682
ENSMUSG00000029700
ENSMUSG00000029716
ENSMUSG00000029718
ENSMUSG00000029736
ENSMUSG00000029765
ENSMUSG00000029771
ENSMUSG00000029802
ENSMUSG00000029810
ENSMUSG00000029833
ENSMUSG00000029838
ENSMUSG00000029848
ENSMUSG00000029919
ENSMUSG00000029925
ENSMUSG00000029999
ENSMUSG00000030000
ENSMUSG00000030001
ENSMUSG00000030029
ENSMUSG00000030077
ENSMUSG00000030084
ENSMUSG00000030092
ENSMUSG00000030096
ENSMUSG00000030103
ENSMUSG00000030124
ENSMUSG00000030156
ENSMUSG00000030168
ENSMUSG00000030218
ENSMUSG00000030220
ENSMUSG00000030223
ENSMUSG00000030243
ENSMUSG00000030247
ENSMUSG00000030249
ENSMUSG00000030283
ENSMUSG00000030302
ENSMUSG00000030322
ENSMUSG00000030336
ENSMUSG00000030339
ENSMUSG00000030342
ENSMUSG00000030345
ENSMUSG00000030380
ENSMUSG00000030399
ENSMUSG00000030406
ENSMUSG00000030409
ENSMUSG00000030468
ENSMUSG00000030492
ENSMUSG00000030525
ENSMUSG00000030536
ENSMUSG00000030538
ENSMUSG00000030546
ENSMUSG00000030560
ENSMUSG00000030577
ENSMUSG00000030579
ENSMUSG00000030605
ENSMUSG00000030616
ENSMUSG00000030651
ENSMUSG00000030669
ENSMUSG00000030671
ENSMUSG00000030707
ENSMUSG00000030720
ENSMUSG00000030742
ENSMUSG00000030745
ENSMUSG00000030748
ENSMUSG00000030762
ENSMUSG00000030772
ENSMUSG00000030775
ENSMUSG00000030785
ENSMUSG00000030786
ENSMUSG00000030787
ENSMUSG00000030793
ENSMUSG00000030798
ENSMUSG00000030826
ENSMUSG00000030830
ENSMUSG00000030834
ENSMUSG00000030866
ENSMUSG00000030894
ENSMUSG00000030905
ENSMUSG00000030911
ENSMUSG00000030963
ENSMUSG00000031015
ENSMUSG00000031028
ENSMUSG00000031101
ENSMUSG00000031103
ENSMUSG00000031130
ENSMUSG00000031132
ENSMUSG00000031142
ENSMUSG00000031155
ENSMUSG00000031165
ENSMUSG00000031196
ENSMUSG00000031214
ENSMUSG00000031250
ENSMUSG00000031255
ENSMUSG00000031257
ENSMUSG00000031264
ENSMUSG00000031266
ENSMUSG00000031284
ENSMUSG00000031285
ENSMUSG00000031289
ENSMUSG00000031293
ENSMUSG00000031304
ENSMUSG00000031309
ENSMUSG00000031343
ENSMUSG00000031354
ENSMUSG00000031375
ENSMUSG00000031387
ENSMUSG00000031392
ENSMUSG00000031393
ENSMUSG00000031403
ENSMUSG00000031425
ENSMUSG00000031449
ENSMUSG00000031450
ENSMUSG00000031451
ENSMUSG00000031489
ENSMUSG00000031490
ENSMUSG00000031491
ENSMUSG00000031517
ENSMUSG00000031521
ENSMUSG00000031538
ENSMUSG00000031539
ENSMUSG00000031551
ENSMUSG00000031553
ENSMUSG00000031561
ENSMUSG00000031596
ENSMUSG00000031601
ENSMUSG00000031633
ENSMUSG00000031639
ENSMUSG00000031661
ENSMUSG00000031688
ENSMUSG00000031710
ENSMUSG00000031712
ENSMUSG00000031737
ENSMUSG00000031749
ENSMUSG00000031760
ENSMUSG00000031762
ENSMUSG00000031765
ENSMUSG00000031766
ENSMUSG00000031803
ENSMUSG00000031805
ENSMUSG00000031808
ENSMUSG00000031834
ENSMUSG00000031838
ENSMUSG00000031845
ENSMUSG00000031897
ENSMUSG00000031903
ENSMUSG00000031906
ENSMUSG00000031910
ENSMUSG00000031952
ENSMUSG00000031985
ENSMUSG00000031997
ENSMUSG00000032012
ENSMUSG00000032033
ENSMUSG00000032034
ENSMUSG00000032038
ENSMUSG00000032041
ENSMUSG00000032053
ENSMUSG00000032060
ENSMUSG00000032076
ENSMUSG00000032080
ENSMUSG00000032083
ENSMUSG00000032093
ENSMUSG00000032094
ENSMUSG00000032098
ENSMUSG00000032101
ENSMUSG00000032171
ENSMUSG00000032175
ENSMUSG00000032177
ENSMUSG00000032193
ENSMUSG00000032204
ENSMUSG00000032207
ENSMUSG00000032231
ENSMUSG00000032243
ENSMUSG00000032244
ENSMUSG00000032249
ENSMUSG00000032262
ENSMUSG00000032269
ENSMUSG00000032274
ENSMUSG00000032293
ENSMUSG00000032298
ENSMUSG00000032334
ENSMUSG00000032348
ENSMUSG00000032356
ENSMUSG00000032369
ENSMUSG00000032420
ENSMUSG00000032431
ENSMUSG00000032454
ENSMUSG00000032482
ENSMUSG00000032494
ENSMUSG00000032496
ENSMUSG00000032498
ENSMUSG00000032503
ENSMUSG00000032508
ENSMUSG00000032517
ENSMUSG00000032537
ENSMUSG00000032556
ENSMUSG00000032577
ENSMUSG00000032591
ENSMUSG00000032623
ENSMUSG00000032679
ENSMUSG00000032688
ENSMUSG00000032691
ENSMUSG00000032715
ENSMUSG00000032726
ENSMUSG00000032739
ENSMUSG00000032769
ENSMUSG00000032773
ENSMUSG00000032815
ENSMUSG00000032839
ENSMUSG00000032849
ENSMUSG00000032854
ENSMUSG00000032860
ENSMUSG00000032864
ENSMUSG00000032872
ENSMUSG00000032911
ENSMUSG00000032937
ENSMUSG00000032942
ENSMUSG00000032946
ENSMUSG00000032978
ENSMUSG00000033080
ENSMUSG00000033156
ENSMUSG00000033210
ENSMUSG00000033220
ENSMUSG00000033249
ENSMUSG00000033327
ENSMUSG00000033350
ENSMUSG00000033392
ENSMUSG00000033467
ENSMUSG00000033470
ENSMUSG00000033486
ENSMUSG00000033508
ENSMUSG00000033538
ENSMUSG00000033540
ENSMUSG00000033644
ENSMUSG00000033685
ENSMUSG00000033721
ENSMUSG00000033726
ENSMUSG00000033770
ENSMUSG00000033788
ENSMUSG00000033860
ENSMUSG00000033880
ENSMUSG00000033910
ENSMUSG00000033918
ENSMUSG00000033965
ENSMUSG00000034009
ENSMUSG00000034041
ENSMUSG00000034108
ENSMUSG00000034116
ENSMUSG00000034117
ENSMUSG00000034118
ENSMUSG00000034206
ENSMUSG00000034353
ENSMUSG00000034394
ENSMUSG00000034450
ENSMUSG00000034472
ENSMUSG00000034485
ENSMUSG00000034533
ENSMUSG00000034573
ENSMUSG00000034664
ENSMUSG00000034684
ENSMUSG00000034708
ENSMUSG00000034761
ENSMUSG00000034783
ENSMUSG00000034785
ENSMUSG00000034793
ENSMUSG00000034837
ENSMUSG00000034855
ENSMUSG00000034881
ENSMUSG00000034910
ENSMUSG00000034987
ENSMUSG00000034997
ENSMUSG00000035000
ENSMUSG00000035042
ENSMUSG00000035186
ENSMUSG00000035237
ENSMUSG00000035246
ENSMUSG00000035262
ENSMUSG00000035352
ENSMUSG00000035373
ENSMUSG00000035383
ENSMUSG00000035385
ENSMUSG00000035431
ENSMUSG00000035448
ENSMUSG00000035521
ENSMUSG00000035540
ENSMUSG00000035594
ENSMUSG00000035678
ENSMUSG00000035681
ENSMUSG00000035699
ENSMUSG00000035722
ENSMUSG00000035745
ENSMUSG00000035783
ENSMUSG00000035847
ENSMUSG00000035891
ENSMUSG00000035914
ENSMUSG00000035916
ENSMUSG00000035930
ENSMUSG00000036073
ENSMUSG00000036104
ENSMUSG00000036117
ENSMUSG00000036123
ENSMUSG00000036139
ENSMUSG00000036169
ENSMUSG00000036251
ENSMUSG00000036306
ENSMUSG00000036353
ENSMUSG00000036390
ENSMUSG00000036446
ENSMUSG00000036469
ENSMUSG00000036500
ENSMUSG00000036526
ENSMUSG00000036545
ENSMUSG00000036570
ENSMUSG00000036587
ENSMUSG00000036594
ENSMUSG00000036634
ENSMUSG00000036639
ENSMUSG00000036678
ENSMUSG00000036712
ENSMUSG00000036766
ENSMUSG00000036817
ENSMUSG00000036832
ENSMUSG00000036858
ENSMUSG00000036887
ENSMUSG00000036899
ENSMUSG00000036912
ENSMUSG00000036931
ENSMUSG00000036986
ENSMUSG00000037010
ENSMUSG00000037049
ENSMUSG00000037062
ENSMUSG00000037071
ENSMUSG00000037202
ENSMUSG00000037217
ENSMUSG00000037295
ENSMUSG00000037321
ENSMUSG00000037337
ENSMUSG00000037346
ENSMUSG00000037366
ENSMUSG00000037379
ENSMUSG00000037405
ENSMUSG00000037440
ENSMUSG00000037446
ENSMUSG00000037465
ENSMUSG00000037523
ENSMUSG00000037533
ENSMUSG00000037573
ENSMUSG00000037583
ENSMUSG00000037624
ENSMUSG00000037625
ENSMUSG00000037649
ENSMUSG00000037660
ENSMUSG00000037705
ENSMUSG00000037706
ENSMUSG00000037780
ENSMUSG00000037798
ENSMUSG00000037820
ENSMUSG00000037852
ENSMUSG00000037872
ENSMUSG00000037902
ENSMUSG00000037922
ENSMUSG00000037944
ENSMUSG00000037996
ENSMUSG00000038015
ENSMUSG00000038056
ENSMUSG00000038058
ENSMUSG00000038077
ENSMUSG00000038086
ENSMUSG00000038155
ENSMUSG00000038194
ENSMUSG00000038224
ENSMUSG00000038227
ENSMUSG00000038235
ENSMUSG00000038239
ENSMUSG00000038257
ENSMUSG00000038260
ENSMUSG00000038264
ENSMUSG00000038276
ENSMUSG00000038298
ENSMUSG00000038319
ENSMUSG00000038349
ENSMUSG00000038357
ENSMUSG00000038393
ENSMUSG00000038418
ENSMUSG00000038498
ENSMUSG00000038537
ENSMUSG00000038541
ENSMUSG00000038583
ENSMUSG00000038642
ENSMUSG00000038665
ENSMUSG00000038676
ENSMUSG00000038700
ENSMUSG00000038721
ENSMUSG00000038738
ENSMUSG00000038751
ENSMUSG00000038754
ENSMUSG00000038776
ENSMUSG00000038780
ENSMUSG00000038805
ENSMUSG00000038822
ENSMUSG00000038843
ENSMUSG00000038855
ENSMUSG00000038886
ENSMUSG00000038910
ENSMUSG00000038914
ENSMUSG00000038976
ENSMUSG00000039004
ENSMUSG00000039005
ENSMUSG00000039059
ENSMUSG00000039062
ENSMUSG00000039095
ENSMUSG00000039097
ENSMUSG00000039106
ENSMUSG00000039109
ENSMUSG00000039193
ENSMUSG00000039194
ENSMUSG00000039304
ENSMUSG00000039315
ENSMUSG00000039321
ENSMUSG00000039323
ENSMUSG00000039384
ENSMUSG00000039419
ENSMUSG00000039474
ENSMUSG00000039481
ENSMUSG00000039519
ENSMUSG00000039601
ENSMUSG00000039621
ENSMUSG00000039639
ENSMUSG00000039672
ENSMUSG00000039682
ENSMUSG00000039748
ENSMUSG00000039809
ENSMUSG00000039873
ENSMUSG00000039899
ENSMUSG00000039904
ENSMUSG00000040009
ENSMUSG00000040013
ENSMUSG00000040016
ENSMUSG00000040033
ENSMUSG00000040040
ENSMUSG00000040046
ENSMUSG00000040061
ENSMUSG00000040136
ENSMUSG00000040138
ENSMUSG00000040147
ENSMUSG00000040205
ENSMUSG00000040270
ENSMUSG00000040329
ENSMUSG00000040495
ENSMUSG00000040505
ENSMUSG00000040511
ENSMUSG00000040533
ENSMUSG00000040552
ENSMUSG00000040554
ENSMUSG00000040564
ENSMUSG00000040584
ENSMUSG00000040592
ENSMUSG00000040627
ENSMUSG00000040632
ENSMUSG00000040712
ENSMUSG00000040751
ENSMUSG00000040770
ENSMUSG00000040841
ENSMUSG00000040850
ENSMUSG00000040860
ENSMUSG00000040918
ENSMUSG00000040957
ENSMUSG00000040963
ENSMUSG00000040998
ENSMUSG00000041046
ENSMUSG00000041078
ENSMUSG00000041135
ENSMUSG00000041165
ENSMUSG00000041193
ENSMUSG00000041359
ENSMUSG00000041380
ENSMUSG00000041429
ENSMUSG00000041444
ENSMUSG00000041468
ENSMUSG00000041515
ENSMUSG00000041534
ENSMUSG00000041550
ENSMUSG00000041556
ENSMUSG00000041559
ENSMUSG00000041578
ENSMUSG00000041607
ENSMUSG00000041616
ENSMUSG00000041624
ENSMUSG00000041681
ENSMUSG00000041717
ENSMUSG00000041741
ENSMUSG00000041750
ENSMUSG00000041836
ENSMUSG00000041890
ENSMUSG00000041954
ENSMUSG00000042010
ENSMUSG00000042045
ENSMUSG00000042082
ENSMUSG00000042167
ENSMUSG00000042228
ENSMUSG00000042249
ENSMUSG00000042282
ENSMUSG00000042284
ENSMUSG00000042333
ENSMUSG00000042340
ENSMUSG00000042351
ENSMUSG00000042388
ENSMUSG00000042429
ENSMUSG00000042476
ENSMUSG00000042529
ENSMUSG00000042594
ENSMUSG00000042604
ENSMUSG00000042605
ENSMUSG00000042632
ENSMUSG00000042638
ENSMUSG00000042717
ENSMUSG00000042784
ENSMUSG00000042797
ENSMUSG00000042808
ENSMUSG00000042817
ENSMUSG00000043008
ENSMUSG00000043029
ENSMUSG00000043051
ENSMUSG00000043165
ENSMUSG00000043207
ENSMUSG00000043219
ENSMUSG00000043301
ENSMUSG00000043342
ENSMUSG00000043613
ENSMUSG00000043675
ENSMUSG00000043753
ENSMUSG00000043760
ENSMUSG00000043811
ENSMUSG00000043909
ENSMUSG00000043991
ENSMUSG00000044014
ENSMUSG00000044034
ENSMUSG00000044055
ENSMUSG00000044080
ENSMUSG00000044162
ENSMUSG00000044254
ENSMUSG00000044288
ENSMUSG00000044338
ENSMUSG00000044339
ENSMUSG00000044453
ENSMUSG00000044518
ENSMUSG00000044534
ENSMUSG00000044583
ENSMUSG00000044786
ENSMUSG00000044827
ENSMUSG00000044968
ENSMUSG00000044988
ENSMUSG00000045038
ENSMUSG00000045052
ENSMUSG00000045103
ENSMUSG00000045179
ENSMUSG00000045322
ENSMUSG00000045493
ENSMUSG00000045518
ENSMUSG00000045534
ENSMUSG00000045551
ENSMUSG00000045573
ENSMUSG00000045594
ENSMUSG00000045613
ENSMUSG00000045671
ENSMUSG00000045730
ENSMUSG00000045731
ENSMUSG00000045817
ENSMUSG00000045827
ENSMUSG00000045867
ENSMUSG00000045969
ENSMUSG00000045994
ENSMUSG00000046008
ENSMUSG00000046070
ENSMUSG00000046159
ENSMUSG00000046223
ENSMUSG00000046230
ENSMUSG00000046323
ENSMUSG00000046402
ENSMUSG00000046532
ENSMUSG00000046607
ENSMUSG00000046707
ENSMUSG00000046711
ENSMUSG00000046719
ENSMUSG00000046879
ENSMUSG00000046908
ENSMUSG00000046949
ENSMUSG00000047123
ENSMUSG00000047139
ENSMUSG00000047197
ENSMUSG00000047314
ENSMUSG00000047379
ENSMUSG00000047446
ENSMUSG00000047517
ENSMUSG00000047557
ENSMUSG00000047638
ENSMUSG00000047654
ENSMUSG00000047797
ENSMUSG00000047878
ENSMUSG00000047880
ENSMUSG00000047898
ENSMUSG00000047904
ENSMUSG00000047911
ENSMUSG00000047945
ENSMUSG00000047976
ENSMUSG00000048003
ENSMUSG00000048077
ENSMUSG00000048163
ENSMUSG00000048240
ENSMUSG00000048337
ENSMUSG00000048368
ENSMUSG00000048488
ENSMUSG00000048521
ENSMUSG00000048562
ENSMUSG00000048806
ENSMUSG00000049044
ENSMUSG00000049093
ENSMUSG00000049103
ENSMUSG00000049112
ENSMUSG00000049115
ENSMUSG00000049130
ENSMUSG00000049265
ENSMUSG00000049307
ENSMUSG00000049511
ENSMUSG00000049547
ENSMUSG00000049550
ENSMUSG00000049551
ENSMUSG00000049556
ENSMUSG00000049576
ENSMUSG00000049583
ENSMUSG00000049604
ENSMUSG00000049624
ENSMUSG00000049649
ENSMUSG00000049685
ENSMUSG00000049699
ENSMUSG00000049721
ENSMUSG00000049723
ENSMUSG00000049734
ENSMUSG00000049892
ENSMUSG00000049908
ENSMUSG00000049932
ENSMUSG00000050089
ENSMUSG00000050132
ENSMUSG00000050164
ENSMUSG00000050232
ENSMUSG00000050241
ENSMUSG00000050335
ENSMUSG00000050368
ENSMUSG00000050377
ENSMUSG00000050440
ENSMUSG00000050445
ENSMUSG00000050511
ENSMUSG00000050541
ENSMUSG00000050578
ENSMUSG00000050612
ENSMUSG00000050675
ENSMUSG00000050737
ENSMUSG00000050761
ENSMUSG00000050824
ENSMUSG00000051079
ENSMUSG00000051136
ENSMUSG00000051147
ENSMUSG00000051153
ENSMUSG00000051439
ENSMUSG00000051457
ENSMUSG00000051498
ENSMUSG00000051839
ENSMUSG00000051969
ENSMUSG00000051977
ENSMUSG00000052013
ENSMUSG00000052031
ENSMUSG00000052131
ENSMUSG00000052234
ENSMUSG00000052301
ENSMUSG00000052336
ENSMUSG00000052430
ENSMUSG00000052435
ENSMUSG00000052557
ENSMUSG00000052572
ENSMUSG00000052821
ENSMUSG00000052920
ENSMUSG00000053004
ENSMUSG00000053024
ENSMUSG00000053044
ENSMUSG00000053153
ENSMUSG00000053158
ENSMUSG00000053175
ENSMUSG00000053198
ENSMUSG00000053205
ENSMUSG00000053302
ENSMUSG00000053368
ENSMUSG00000053475
ENSMUSG00000053773
ENSMUSG00000053846
ENSMUSG00000053863
ENSMUSG00000054115
ENSMUSG00000054256
ENSMUSG00000054321
ENSMUSG00000054342
ENSMUSG00000054422
ENSMUSG00000054452
ENSMUSG00000054477
ENSMUSG00000054520
ENSMUSG00000054580
ENSMUSG00000054612
ENSMUSG00000054667
ENSMUSG00000054733
ENSMUSG00000054764
ENSMUSG00000054871
ENSMUSG00000054892
ENSMUSG00000054988
ENSMUSG00000055078
ENSMUSG00000055116
ENSMUSG00000055301
ENSMUSG00000055322
ENSMUSG00000055493
ENSMUSG00000055737
ENSMUSG00000055782
ENSMUSG00000055866
ENSMUSG00000055994
ENSMUSG00000056071
ENSMUSG00000056073
ENSMUSG00000056091
ENSMUSG00000056130
ENSMUSG00000056174
ENSMUSG00000056220
ENSMUSG00000056328
ENSMUSG00000056436
ENSMUSG00000056481
ENSMUSG00000056486
ENSMUSG00000056529
ENSMUSG00000056553
ENSMUSG00000056569
ENSMUSG00000056648
ENSMUSG00000056737
ENSMUSG00000056755
ENSMUSG00000056854
ENSMUSG00000056917
ENSMUSG00000056947
ENSMUSG00000057003
ENSMUSG00000057098
ENSMUSG00000057177
ENSMUSG00000057228
ENSMUSG00000057337
ENSMUSG00000057342
ENSMUSG00000057367
ENSMUSG00000057378
ENSMUSG00000057457
ENSMUSG00000057606
ENSMUSG00000057614
ENSMUSG00000058153
ENSMUSG00000058183
ENSMUSG00000058217
ENSMUSG00000058488
ENSMUSG00000058715
ENSMUSG00000058729
ENSMUSG00000058755
ENSMUSG00000058806
ENSMUSG00000058818
ENSMUSG00000058975
ENSMUSG00000059003
ENSMUSG00000059049
ENSMUSG00000059280
ENSMUSG00000059305
ENSMUSG00000059434
ENSMUSG00000059456
ENSMUSG00000059481
ENSMUSG00000059498
ENSMUSG00000059602
ENSMUSG00000059625
ENSMUSG00000059654
ENSMUSG00000059668
ENSMUSG00000059866
ENSMUSG00000059883
ENSMUSG00000059970
ENSMUSG00000059991
ENSMUSG00000060063
ENSMUSG00000060166
ENSMUSG00000060216
ENSMUSG00000060445
ENSMUSG00000060470
ENSMUSG00000060548
ENSMUSG00000060579
ENSMUSG00000060601
ENSMUSG00000060803
ENSMUSG00000060807
ENSMUSG00000060882
ENSMUSG00000061048
ENSMUSG00000061068
ENSMUSG00000061099
ENSMUSG00000061132
ENSMUSG00000061232
ENSMUSG00000061665
ENSMUSG00000061718
ENSMUSG00000061762
ENSMUSG00000061780
ENSMUSG00000061808
ENSMUSG00000062007
ENSMUSG00000062014
ENSMUSG00000062077
ENSMUSG00000062151
ENSMUSG00000062157
ENSMUSG00000062300
ENSMUSG00000062372
ENSMUSG00000062444
ENSMUSG00000062515
ENSMUSG00000062585
ENSMUSG00000062694
ENSMUSG00000062939
ENSMUSG00000062995
ENSMUSG00000063065
ENSMUSG00000063133
ENSMUSG00000063142
ENSMUSG00000063157
ENSMUSG00000063239
ENSMUSG00000063428
ENSMUSG00000063681
ENSMUSG00000063796
ENSMUSG00000063856
ENSMUSG00000063870
ENSMUSG00000063889
ENSMUSG00000063935
ENSMUSG00000063975
ENSMUSG00000064023
ENSMUSG00000064158
ENSMUSG00000064177
ENSMUSG00000064272
ENSMUSG00000064373
ENSMUSG00000065987
ENSMUSG00000066048
ENSMUSG00000066058
ENSMUSG00000066072
ENSMUSG00000066307
ENSMUSG00000066441
ENSMUSG00000066687
ENSMUSG00000066800
ENSMUSG00000067149
ENSMUSG00000067212
ENSMUSG00000067283
ENSMUSG00000067284
ENSMUSG00000067653
ENSMUSG00000068037
ENSMUSG00000068105
ENSMUSG00000068122
ENSMUSG00000068196
ENSMUSG00000068206
ENSMUSG00000068220
ENSMUSG00000068227
ENSMUSG00000068327
ENSMUSG00000068329
ENSMUSG00000068335
ENSMUSG00000068615
ENSMUSG00000068686
ENSMUSG00000068742
ENSMUSG00000068747
ENSMUSG00000068748
ENSMUSG00000069170
ENSMUSG00000069601
ENSMUSG00000069874
ENSMUSG00000069919
ENSMUSG00000070304
ENSMUSG00000070370
ENSMUSG00000070425
ENSMUSG00000070561
ENSMUSG00000070643
ENSMUSG00000070644
ENSMUSG00000070691
ENSMUSG00000071042
ENSMUSG00000071341
ENSMUSG00000071359
ENSMUSG00000071424
ENSMUSG00000071489
ENSMUSG00000071648
ENSMUSG00000071658
ENSMUSG00000071713
ENSMUSG00000072423
ENSMUSG00000072647
ENSMUSG00000072659
ENSMUSG00000072770
ENSMUSG00000072832
ENSMUSG00000073074
ENSMUSG00000073093
ENSMUSG00000073272
ENSMUSG00000073418
ENSMUSG00000073461
ENSMUSG00000073463
ENSMUSG00000073494
ENSMUSG00000073727
ENSMUSG00000073802
ENSMUSG00000073982
ENSMUSG00000073988
ENSMUSG00000073993
ENSMUSG00000074003
ENSMUSG00000074006
ENSMUSG00000074064
ENSMUSG00000074105
ENSMUSG00000074129
ENSMUSG00000074141
ENSMUSG00000074147
ENSMUSG00000074207
ENSMUSG00000074272
ENSMUSG00000074276
ENSMUSG00000074340
ENSMUSG00000074361
ENSMUSG00000074435
ENSMUSG00000074483
ENSMUSG00000074486
ENSMUSG00000074510
ENSMUSG00000074695
ENSMUSG00000074886
ENSMUSG00000074939
ENSMUSG00000075122
ENSMUSG00000075216
ENSMUSG00000075284
ENSMUSG00000075370
ENSMUSG00000076439
ENSMUSG00000076502
ENSMUSG00000076860
ENSMUSG00000076923

## Sheet: normal
Ensembl_gene_id
ENSMUSG00000000159
ENSMUSG00000000385
ENSMUSG00000000392
ENSMUSG00000001417
ENSMUSG00000002055
ENSMUSG00000003099
ENSMUSG00000004263
ENSMUSG00000004630
ENSMUSG00000004864
ENSMUSG00000005262
ENSMUSG00000005483
ENSMUSG00000006281
ENSMUSG00000007209
ENSMUSG00000008438
ENSMUSG00000009733
ENSMUSG00000010651
ENSMUSG00000014813
ENSMUSG00000015094
ENSMUSG00000015839
ENSMUSG00000015843
ENSMUSG00000017344
ENSMUSG00000018322
ENSMUSG00000019102
ENSMUSG00000019278
ENSMUSG00000019876
ENSMUSG00000020190
ENSMUSG00000020467
ENSMUSG00000020668
ENSMUSG00000021576
ENSMUSG00000021601
ENSMUSG00000021843
ENSMUSG00000021943
ENSMUSG00000022123
ENSMUSG00000022439
ENSMUSG00000022474
ENSMUSG00000022496
ENSMUSG00000022610
ENSMUSG00000023064
ENSMUSG00000024044
ENSMUSG00000024174
ENSMUSG00000024186
ENSMUSG00000024290
ENSMUSG00000024395
ENSMUSG00000024440
ENSMUSG00000024471
ENSMUSG00000024896
ENSMUSG00000025486
ENSMUSG00000025592
ENSMUSG00000025630
ENSMUSG00000025647
ENSMUSG00000026424
ENSMUSG00000026483
ENSMUSG00000026701
ENSMUSG00000026723
ENSMUSG00000027318
ENSMUSG00000027445
ENSMUSG00000027499
ENSMUSG00000027522
ENSMUSG00000027579
ENSMUSG00000027584
ENSMUSG00000027792
ENSMUSG00000027831
ENSMUSG00000027863
ENSMUSG00000028654
ENSMUSG00000028708
ENSMUSG00000029309
ENSMUSG00000029406
ENSMUSG00000029524
ENSMUSG00000029608
ENSMUSG00000029998
ENSMUSG00000030255
ENSMUSG00000030494
ENSMUSG00000030595
ENSMUSG00000030681
ENSMUSG00000030935
ENSMUSG00000031111
ENSMUSG00000031207
ENSMUSG00000031273
ENSMUSG00000031355
ENSMUSG00000031380
ENSMUSG00000031621
ENSMUSG00000031636
ENSMUSG00000031849
ENSMUSG00000031861
ENSMUSG00000031932
ENSMUSG00000032191
ENSMUSG00000032375
ENSMUSG00000032601
ENSMUSG00000032725
ENSMUSG00000034457
ENSMUSG00000034792
ENSMUSG00000034801
ENSMUSG00000034917
ENSMUSG00000035105
ENSMUSG00000036330
ENSMUSG00000036422
ENSMUSG00000036760
ENSMUSG00000037017
ENSMUSG00000037104
ENSMUSG00000037129
ENSMUSG00000037316
ENSMUSG00000037685
ENSMUSG00000038508
ENSMUSG00000038691
ENSMUSG00000038781
ENSMUSG00000039457
ENSMUSG00000039706
ENSMUSG00000039775
ENSMUSG00000039913
ENSMUSG00000040174
ENSMUSG00000040327
ENSMUSG00000040694
ENSMUSG00000041309
ENSMUSG00000041583
ENSMUSG00000041889
ENSMUSG00000042279
ENSMUSG00000042428
ENSMUSG00000042535
ENSMUSG00000043953
ENSMUSG00000044052
ENSMUSG00000044068
ENSMUSG00000044149
ENSMUSG00000044201
ENSMUSG00000045007
ENSMUSG00000047492
ENSMUSG00000047562
ENSMUSG00000047678
ENSMUSG00000048480
ENSMUSG00000048982
ENSMUSG00000049128
ENSMUSG00000049252
ENSMUSG00000049313
ENSMUSG00000049608
ENSMUSG00000050379
ENSMUSG00000050534
ENSMUSG00000050896
ENSMUSG00000050901
ENSMUSG00000050963
ENSMUSG00000051391
ENSMUSG00000052151
ENSMUSG00000053040
ENSMUSG00000053062
ENSMUSG00000053646
ENSMUSG00000054021
ENSMUSG00000055053
ENSMUSG00000055373
ENSMUSG00000056148
ENSMUSG00000056222
ENSMUSG00000058709
ENSMUSG00000059412
ENSMUSG00000060461
ENSMUSG00000061601
ENSMUSG00000062184
ENSMUSG00000062438
ENSMUSG00000063011
ENSMUSG00000066090
ENSMUSG00000068008
ENSMUSG00000068048
ENSMUSG00000068129
ENSMUSG00000068643
ENSMUSG00000070687
ENSMUSG00000072845
ENSMUSG00000073433
ENSMUSG00000075536

## Sheet: dN_dS
Singletons with 25% highest dN/dS	Singletons with 25% lowest dN/dS
ENSMUSG00000000171	ENSMUSG00000000131
ENSMUSG00000000563	ENSMUSG00000000776
ENSMUSG00000000884	ENSMUSG00000000902
ENSMUSG00000000959	ENSMUSG00000001018
ENSMUSG00000001036	ENSMUSG00000001039
ENSMUSG00000001418	ENSMUSG00000001376
ENSMUSG00000001521	ENSMUSG00000001524
ENSMUSG00000001569	ENSMUSG00000001576
ENSMUSG00000001707	ENSMUSG00000001783
ENSMUSG00000001942	ENSMUSG00000002052
ENSMUSG00000002307	ENSMUSG00000002129
ENSMUSG00000002319	ENSMUSG00000002249
ENSMUSG00000002329	ENSMUSG00000002320
ENSMUSG00000002635	ENSMUSG00000002455
ENSMUSG00000002767	ENSMUSG00000002718
ENSMUSG00000003923	ENSMUSG00000002728
ENSMUSG00000004018	ENSMUSG00000002870
ENSMUSG00000004270	ENSMUSG00000002981
ENSMUSG00000004462	ENSMUSG00000003099
ENSMUSG00000004561	ENSMUSG00000003135
ENSMUSG00000004821	ENSMUSG00000003234
ENSMUSG00000004896	ENSMUSG00000003316
ENSMUSG00000005131	ENSMUSG00000003380
ENSMUSG00000005220	ENSMUSG00000003435
ENSMUSG00000005378	ENSMUSG00000003437
ENSMUSG00000005846	ENSMUSG00000003660
ENSMUSG00000005907	ENSMUSG00000003808
ENSMUSG00000005994	ENSMUSG00000003868
ENSMUSG00000006050	ENSMUSG00000003949
ENSMUSG00000006179	ENSMUSG00000004264
ENSMUSG00000006676	ENSMUSG00000004460
ENSMUSG00000006678	ENSMUSG00000004637
ENSMUSG00000006763	ENSMUSG00000004788
ENSMUSG00000006958	ENSMUSG00000004843
ENSMUSG00000007867	ENSMUSG00000005103
ENSMUSG00000009070	ENSMUSG00000005198
ENSMUSG00000009535	ENSMUSG00000005262
ENSMUSG00000009734	ENSMUSG00000005362
ENSMUSG00000010136	ENSMUSG00000005410
ENSMUSG00000010406	ENSMUSG00000005514
ENSMUSG00000011114	ENSMUSG00000005580
ENSMUSG00000011154	ENSMUSG00000005609
ENSMUSG00000011254	ENSMUSG00000005813
ENSMUSG00000012187	ENSMUSG00000005881
ENSMUSG00000012443	ENSMUSG00000005982
ENSMUSG00000012519	ENSMUSG00000006005
ENSMUSG00000013622	ENSMUSG00000006058
ENSMUSG00000013997	ENSMUSG00000006134
ENSMUSG00000014245	ENSMUSG00000006299
ENSMUSG00000014550	ENSMUSG00000006315
ENSMUSG00000015016	ENSMUSG00000006392
ENSMUSG00000015790	ENSMUSG00000007987
ENSMUSG00000016495	ENSMUSG00000008373
ENSMUSG00000016541	ENSMUSG00000008958
ENSMUSG00000016833	ENSMUSG00000009907
ENSMUSG00000018196	ENSMUSG00000010045
ENSMUSG00000018405	ENSMUSG00000010057
ENSMUSG00000018428	ENSMUSG00000010392
ENSMUSG00000018449	ENSMUSG00000010911
ENSMUSG00000018554	ENSMUSG00000012535
ENSMUSG00000018574	ENSMUSG00000013629
ENSMUSG00000018697	ENSMUSG00000013646
ENSMUSG00000018761	ENSMUSG00000014748
ENSMUSG00000018995	ENSMUSG00000015095
ENSMUSG00000019689	ENSMUSG00000015357
ENSMUSG00000019791	ENSMUSG00000015488
ENSMUSG00000019822	ENSMUSG00000015668
ENSMUSG00000019883	ENSMUSG00000015748
ENSMUSG00000019986	ENSMUSG00000015757
ENSMUSG00000019988	ENSMUSG00000015776
ENSMUSG00000020014	ENSMUSG00000015804
ENSMUSG00000020063	ENSMUSG00000015971
ENSMUSG00000020097	ENSMUSG00000016554
ENSMUSG00000020153	ENSMUSG00000017288
ENSMUSG00000020284	ENSMUSG00000017405
ENSMUSG00000020287	ENSMUSG00000017615
ENSMUSG00000020319	ENSMUSG00000017664
ENSMUSG00000020330	ENSMUSG00000017721
ENSMUSG00000020447	ENSMUSG00000018068
ENSMUSG00000020459	ENSMUSG00000018189
ENSMUSG00000020474	ENSMUSG00000018287
ENSMUSG00000020576	ENSMUSG00000018415
ENSMUSG00000020636	ENSMUSG00000018481
ENSMUSG00000020638	ENSMUSG00000018559
ENSMUSG00000020803	ENSMUSG00000018651
ENSMUSG00000020832	ENSMUSG00000018865
ENSMUSG00000020895	ENSMUSG00000018923
ENSMUSG00000020988	ENSMUSG00000019054
ENSMUSG00000021054	ENSMUSG00000019132
ENSMUSG00000021241	ENSMUSG00000019188
ENSMUSG00000021322	ENSMUSG00000019373
ENSMUSG00000021339	ENSMUSG00000019470
ENSMUSG00000021376	ENSMUSG00000019802
ENSMUSG00000021428	ENSMUSG00000019984
ENSMUSG00000021499	ENSMUSG00000020083
ENSMUSG00000021519	ENSMUSG00000020198
ENSMUSG00000021751	ENSMUSG00000020260
ENSMUSG00000021785	ENSMUSG00000020289
ENSMUSG00000021786	ENSMUSG00000020321
ENSMUSG00000021810	ENSMUSG00000020397
ENSMUSG00000021819	ENSMUSG00000020471
ENSMUSG00000021902	ENSMUSG00000020495
ENSMUSG00000021906	ENSMUSG00000020537
ENSMUSG00000021932	ENSMUSG00000020741
ENSMUSG00000022013	ENSMUSG00000020790
ENSMUSG00000022023	ENSMUSG00000020801
ENSMUSG00000022040	ENSMUSG00000020843
ENSMUSG00000022195	ENSMUSG00000020850
ENSMUSG00000022223	ENSMUSG00000020863
ENSMUSG00000022236	ENSMUSG00000020952
ENSMUSG00000022243	ENSMUSG00000020962
ENSMUSG00000022244	ENSMUSG00000021022
ENSMUSG00000022323	ENSMUSG00000021065
ENSMUSG00000022375	ENSMUSG00000021103
ENSMUSG00000022401	ENSMUSG00000021112
ENSMUSG00000022431	ENSMUSG00000021147
ENSMUSG00000022450	ENSMUSG00000021156
ENSMUSG00000022519	ENSMUSG00000021400
ENSMUSG00000022672	ENSMUSG00000021413
ENSMUSG00000022677	ENSMUSG00000021500
ENSMUSG00000022704	ENSMUSG00000021518
ENSMUSG00000022706	ENSMUSG00000021559
ENSMUSG00000022742	ENSMUSG00000021598
ENSMUSG00000022748	ENSMUSG00000021893
ENSMUSG00000022756	ENSMUSG00000021930
ENSMUSG00000022765	ENSMUSG00000021952
ENSMUSG00000022805	ENSMUSG00000021975
ENSMUSG00000022837	ENSMUSG00000021978
ENSMUSG00000022853	ENSMUSG00000022031
ENSMUSG00000022889	ENSMUSG00000022035
ENSMUSG00000023094	ENSMUSG00000022089
ENSMUSG00000023151	ENSMUSG00000022142
ENSMUSG00000023262	ENSMUSG00000022160
ENSMUSG00000023963	ENSMUSG00000022174
ENSMUSG00000024033	ENSMUSG00000022191
ENSMUSG00000024078	ENSMUSG00000022253
ENSMUSG00000024082	ENSMUSG00000022350
ENSMUSG00000024135	ENSMUSG00000022414
ENSMUSG00000024194	ENSMUSG00000022429
ENSMUSG00000024234	ENSMUSG00000022437
ENSMUSG00000024271	ENSMUSG00000022442
ENSMUSG00000024352	ENSMUSG00000022476
ENSMUSG00000024505	ENSMUSG00000022477
ENSMUSG00000024645	ENSMUSG00000022536
ENSMUSG00000024683	ENSMUSG00000022540
ENSMUSG00000024790	ENSMUSG00000022562
ENSMUSG00000024831	ENSMUSG00000022570
ENSMUSG00000024887	ENSMUSG00000022613
ENSMUSG00000024905	ENSMUSG00000022663
ENSMUSG00000024906	ENSMUSG00000022673
ENSMUSG00000024953	ENSMUSG00000022702
ENSMUSG00000025038	ENSMUSG00000022710
ENSMUSG00000025208	ENSMUSG00000022761
ENSMUSG00000025591	ENSMUSG00000022779
ENSMUSG00000025616	ENSMUSG00000022972
ENSMUSG00000025645	ENSMUSG00000022974
ENSMUSG00000025745	ENSMUSG00000023110
ENSMUSG00000025758	ENSMUSG00000023118
ENSMUSG00000025759	ENSMUSG00000023883
ENSMUSG00000025787	ENSMUSG00000023921
ENSMUSG00000025898	ENSMUSG00000023932
ENSMUSG00000025899	ENSMUSG00000024007
ENSMUSG00000025916	ENSMUSG00000024073
ENSMUSG00000025963	ENSMUSG00000024134
ENSMUSG00000025995	ENSMUSG00000024231
ENSMUSG00000026036	ENSMUSG00000024258
ENSMUSG00000026037	ENSMUSG00000024287
ENSMUSG00000026048	ENSMUSG00000024319
ENSMUSG00000026082	ENSMUSG00000024359
ENSMUSG00000026095	ENSMUSG00000024382
ENSMUSG00000026107	ENSMUSG00000024410
ENSMUSG00000026112	ENSMUSG00000024422
ENSMUSG00000026142	ENSMUSG00000024429
ENSMUSG00000026171	ENSMUSG00000024462
ENSMUSG00000026187	ENSMUSG00000024474
ENSMUSG00000026196	ENSMUSG00000024477
ENSMUSG00000026199	ENSMUSG00000024560
ENSMUSG00000026203	ENSMUSG00000024578
ENSMUSG00000026260	ENSMUSG00000024581
ENSMUSG00000026377	ENSMUSG00000024583
ENSMUSG00000026427	ENSMUSG00000024601
ENSMUSG00000026450	ENSMUSG00000024603
ENSMUSG00000026500	ENSMUSG00000024644
ENSMUSG00000026601	ENSMUSG00000024725
ENSMUSG00000026609	ENSMUSG00000024735
ENSMUSG00000026611	ENSMUSG00000024740
ENSMUSG00000026649	ENSMUSG00000024742
ENSMUSG00000026664	ENSMUSG00000024743
ENSMUSG00000026723	ENSMUSG00000024785
ENSMUSG00000026726	ENSMUSG00000024797
ENSMUSG00000026734	ENSMUSG00000024805
ENSMUSG00000026740	ENSMUSG00000024853
ENSMUSG00000026754	ENSMUSG00000024911
ENSMUSG00000026779	ENSMUSG00000024926
ENSMUSG00000026784	ENSMUSG00000024947
ENSMUSG00000026866	ENSMUSG00000024966
ENSMUSG00000026975	ENSMUSG00000024974
ENSMUSG00000026989	ENSMUSG00000024991
ENSMUSG00000027074	ENSMUSG00000025007
ENSMUSG00000027203	ENSMUSG00000025016
ENSMUSG00000027242	ENSMUSG00000025024
ENSMUSG00000027259	ENSMUSG00000025027
ENSMUSG00000027300	ENSMUSG00000025049
ENSMUSG00000027305	ENSMUSG00000025139
ENSMUSG00000027309	ENSMUSG00000025157
ENSMUSG00000027324	ENSMUSG00000025226
ENSMUSG00000027357	ENSMUSG00000025231
ENSMUSG00000027363	ENSMUSG00000025234
ENSMUSG00000027378	ENSMUSG00000025427
ENSMUSG00000027412	ENSMUSG00000025487
ENSMUSG00000027424	ENSMUSG00000025503
ENSMUSG00000027431	ENSMUSG00000025609
ENSMUSG00000027518	ENSMUSG00000025613
ENSMUSG00000027550	ENSMUSG00000025737
ENSMUSG00000027610	ENSMUSG00000025738
ENSMUSG00000027702	ENSMUSG00000025785
ENSMUSG00000027722	ENSMUSG00000025858
ENSMUSG00000027845	ENSMUSG00000025873
ENSMUSG00000027952	ENSMUSG00000025876
ENSMUSG00000027953	ENSMUSG00000025982
ENSMUSG00000028008	ENSMUSG00000026111
ENSMUSG00000028018	ENSMUSG00000026127
ENSMUSG00000028024	ENSMUSG00000026174
ENSMUSG00000028069	ENSMUSG00000026219
ENSMUSG00000028085	ENSMUSG00000026229
ENSMUSG00000028093	ENSMUSG00000026239
ENSMUSG00000028139	ENSMUSG00000026247
ENSMUSG00000028164	ENSMUSG00000026275
ENSMUSG00000028229	ENSMUSG00000026356
ENSMUSG00000028247	ENSMUSG00000026361
ENSMUSG00000028261	ENSMUSG00000026374
ENSMUSG00000028294	ENSMUSG00000026439
ENSMUSG00000028369	ENSMUSG00000026496
ENSMUSG00000028393	ENSMUSG00000026553
ENSMUSG00000028416	ENSMUSG00000026558
ENSMUSG00000028430	ENSMUSG00000026563
ENSMUSG00000028431	ENSMUSG00000026585
ENSMUSG00000028443	ENSMUSG00000026735
ENSMUSG00000028454	ENSMUSG00000026771
ENSMUSG00000028467	ENSMUSG00000026790
ENSMUSG00000028470	ENSMUSG00000026799
ENSMUSG00000028523	ENSMUSG00000026867
ENSMUSG00000028540	ENSMUSG00000026914
ENSMUSG00000028563	ENSMUSG00000026965
ENSMUSG00000028587	ENSMUSG00000026974
ENSMUSG00000028589	ENSMUSG00000027079
ENSMUSG00000028647	ENSMUSG00000027099
ENSMUSG00000028687	ENSMUSG00000027104
ENSMUSG00000028688	ENSMUSG00000027162
ENSMUSG00000028690	ENSMUSG00000027168
ENSMUSG00000028756	ENSMUSG00000027185
ENSMUSG00000028885	ENSMUSG00000027245
ENSMUSG00000028906	ENSMUSG00000027253
ENSMUSG00000028979	ENSMUSG00000027263
ENSMUSG00000029049	ENSMUSG00000027291
ENSMUSG00000029097	ENSMUSG00000027342
ENSMUSG00000029098	ENSMUSG00000027411
ENSMUSG00000029130	ENSMUSG00000027425
ENSMUSG00000029136	ENSMUSG00000027430
ENSMUSG00000029145	ENSMUSG00000027498
ENSMUSG00000029147	ENSMUSG00000027569
ENSMUSG00000029155	ENSMUSG00000027613
ENSMUSG00000029162	ENSMUSG00000027649
ENSMUSG00000029165	ENSMUSG00000027655
ENSMUSG00000029179	ENSMUSG00000027778
ENSMUSG00000029182	ENSMUSG00000027828
ENSMUSG00000029191	ENSMUSG00000027933
ENSMUSG00000029283	ENSMUSG00000027998
ENSMUSG00000029346	ENSMUSG00000027999
ENSMUSG00000029413	ENSMUSG00000028114
ENSMUSG00000029490	ENSMUSG00000028127
ENSMUSG00000029499	ENSMUSG00000028187
ENSMUSG00000029536	ENSMUSG00000028334
ENSMUSG00000029613	ENSMUSG00000028381
ENSMUSG00000029624	ENSMUSG00000028468
ENSMUSG00000029701	ENSMUSG00000028532
ENSMUSG00000029885	ENSMUSG00000028671
ENSMUSG00000029911	ENSMUSG00000028709
ENSMUSG00000029919	ENSMUSG00000028737
ENSMUSG00000030002	ENSMUSG00000028745
ENSMUSG00000030045	ENSMUSG00000028757
ENSMUSG00000030094	ENSMUSG00000028792
ENSMUSG00000030125	ENSMUSG00000028798
ENSMUSG00000030177	ENSMUSG00000028811
ENSMUSG00000030214	ENSMUSG00000028821
ENSMUSG00000030254	ENSMUSG00000028833
ENSMUSG00000030264	ENSMUSG00000028848
ENSMUSG00000030271	ENSMUSG00000028882
ENSMUSG00000030423	ENSMUSG00000028932
ENSMUSG00000030450	ENSMUSG00000028953
ENSMUSG00000030521	ENSMUSG00000028960
ENSMUSG00000030528	ENSMUSG00000028990
ENSMUSG00000030560	ENSMUSG00000028991
ENSMUSG00000030612	ENSMUSG00000029003
ENSMUSG00000030647	ENSMUSG00000029034
ENSMUSG00000030706	ENSMUSG00000029048
ENSMUSG00000030760	ENSMUSG00000029056
ENSMUSG00000030769	ENSMUSG00000029060
ENSMUSG00000030780	ENSMUSG00000029111
ENSMUSG00000030825	ENSMUSG00000029196
ENSMUSG00000030850	ENSMUSG00000029250
ENSMUSG00000030884	ENSMUSG00000029265
ENSMUSG00000030888	ENSMUSG00000029326
ENSMUSG00000030889	ENSMUSG00000029402
ENSMUSG00000030960	ENSMUSG00000029415
ENSMUSG00000030979	ENSMUSG00000029434
ENSMUSG00000031161	ENSMUSG00000029446
ENSMUSG00000031226	ENSMUSG00000029455
ENSMUSG00000031518	ENSMUSG00000029464
ENSMUSG00000031521	ENSMUSG00000029466
ENSMUSG00000031532	ENSMUSG00000029535
ENSMUSG00000031591	ENSMUSG00000029550
ENSMUSG00000031816	ENSMUSG00000029551
ENSMUSG00000031826	ENSMUSG00000029560
ENSMUSG00000031851	ENSMUSG00000029569
ENSMUSG00000031885	ENSMUSG00000029578
ENSMUSG00000031931	ENSMUSG00000029647
ENSMUSG00000031949	ENSMUSG00000029649
ENSMUSG00000031984	ENSMUSG00000029708
ENSMUSG00000032047	ENSMUSG00000029715
ENSMUSG00000032077	ENSMUSG00000029752
ENSMUSG00000032103	ENSMUSG00000030008
ENSMUSG00000032121	ENSMUSG00000030034
ENSMUSG00000032219	ENSMUSG00000030042
ENSMUSG00000032251	ENSMUSG00000030056
ENSMUSG00000032386	ENSMUSG00000030062
ENSMUSG00000032397	ENSMUSG00000030083
ENSMUSG00000032459	ENSMUSG00000030291
ENSMUSG00000032534	ENSMUSG00000030330
ENSMUSG00000032563	ENSMUSG00000030347
ENSMUSG00000032579	ENSMUSG00000030376
ENSMUSG00000032598	ENSMUSG00000030400
ENSMUSG00000032743	ENSMUSG00000030451
ENSMUSG00000032769	ENSMUSG00000030509
ENSMUSG00000032869	ENSMUSG00000030532
ENSMUSG00000032872	ENSMUSG00000030534
ENSMUSG00000032900	ENSMUSG00000030541
ENSMUSG00000032998	ENSMUSG00000030591
ENSMUSG00000033009	ENSMUSG00000030610
ENSMUSG00000033106	ENSMUSG00000030619
ENSMUSG00000033210	ENSMUSG00000030655
ENSMUSG00000033222	ENSMUSG00000030685
ENSMUSG00000033276	ENSMUSG00000030697
ENSMUSG00000033356	ENSMUSG00000030714
ENSMUSG00000033429	ENSMUSG00000030754
ENSMUSG00000033439	ENSMUSG00000030788
ENSMUSG00000033488	ENSMUSG00000030801
ENSMUSG00000033701	ENSMUSG00000030844
ENSMUSG00000033762	ENSMUSG00000030867
ENSMUSG00000033931	ENSMUSG00000030868
ENSMUSG00000034083	ENSMUSG00000030967
ENSMUSG00000034212	ENSMUSG00000030978
ENSMUSG00000034235	ENSMUSG00000030982
ENSMUSG00000034329	ENSMUSG00000031353
ENSMUSG00000034442	ENSMUSG00000031379
ENSMUSG00000034501	ENSMUSG00000031479
ENSMUSG00000034617	ENSMUSG00000031516
ENSMUSG00000034875	ENSMUSG00000031562
ENSMUSG00000035069	ENSMUSG00000031575
ENSMUSG00000035126	ENSMUSG00000031667
ENSMUSG00000035139	ENSMUSG00000031696
ENSMUSG00000035171	ENSMUSG00000031787
ENSMUSG00000035179	ENSMUSG00000031796
ENSMUSG00000035266	ENSMUSG00000031821
ENSMUSG00000035495	ENSMUSG00000031835
ENSMUSG00000035505	ENSMUSG00000031858
ENSMUSG00000035572	ENSMUSG00000031862
ENSMUSG00000035578	ENSMUSG00000031864
ENSMUSG00000035824	ENSMUSG00000031865
ENSMUSG00000035845	ENSMUSG00000031878
ENSMUSG00000035878	ENSMUSG00000031889
ENSMUSG00000035958	ENSMUSG00000031935
ENSMUSG00000036023	ENSMUSG00000031959
ENSMUSG00000036223	ENSMUSG00000031960
ENSMUSG00000036282	ENSMUSG00000032030
ENSMUSG00000036285	ENSMUSG00000032042
ENSMUSG00000036298	ENSMUSG00000032112
ENSMUSG00000036299	ENSMUSG00000032116
ENSMUSG00000036376	ENSMUSG00000032127
ENSMUSG00000036557	ENSMUSG00000032185
ENSMUSG00000036598	ENSMUSG00000032224
ENSMUSG00000036745	ENSMUSG00000032263
ENSMUSG00000036764	ENSMUSG00000032279
ENSMUSG00000036810	ENSMUSG00000032376
ENSMUSG00000036890	ENSMUSG00000032388
ENSMUSG00000036962	ENSMUSG00000032437
ENSMUSG00000036983	ENSMUSG00000032468
ENSMUSG00000037005	ENSMUSG00000032512
ENSMUSG00000037049	ENSMUSG00000032571
ENSMUSG00000037085	ENSMUSG00000032633
ENSMUSG00000037101	ENSMUSG00000032818
ENSMUSG00000037259	ENSMUSG00000032840
ENSMUSG00000037270	ENSMUSG00000032939
ENSMUSG00000037349	ENSMUSG00000033021
ENSMUSG00000037355	ENSMUSG00000033373
ENSMUSG00000037375	ENSMUSG00000033379
ENSMUSG00000037376	ENSMUSG00000033416
ENSMUSG00000037455	ENSMUSG00000033557
ENSMUSG00000037553	ENSMUSG00000033578
ENSMUSG00000037572	ENSMUSG00000033623
ENSMUSG00000037617	ENSMUSG00000033628
ENSMUSG00000037627	ENSMUSG00000033732
ENSMUSG00000037801	ENSMUSG00000033793
ENSMUSG00000037847	ENSMUSG00000033916
ENSMUSG00000037958	ENSMUSG00000033940
ENSMUSG00000038039	ENSMUSG00000033970
ENSMUSG00000038046	ENSMUSG00000034006
ENSMUSG00000038060	ENSMUSG00000034022
ENSMUSG00000038070	ENSMUSG00000034154
ENSMUSG00000038080	ENSMUSG00000034160
ENSMUSG00000038225	ENSMUSG00000034190
ENSMUSG00000038268	ENSMUSG00000034192
ENSMUSG00000038279	ENSMUSG00000034216
ENSMUSG00000038422	ENSMUSG00000034259
ENSMUSG00000038425	ENSMUSG00000034263
ENSMUSG00000038540	ENSMUSG00000034274
ENSMUSG00000038541	ENSMUSG00000034345
ENSMUSG00000038683	ENSMUSG00000034390
ENSMUSG00000038685	ENSMUSG00000034453
ENSMUSG00000038725	ENSMUSG00000034560
ENSMUSG00000038879	ENSMUSG00000034673
ENSMUSG00000038963	ENSMUSG00000034826
ENSMUSG00000038991	ENSMUSG00000034850
ENSMUSG00000039007	ENSMUSG00000034893
ENSMUSG00000039031	ENSMUSG00000034926
ENSMUSG00000039048	ENSMUSG00000035048
ENSMUSG00000039199	ENSMUSG00000035062
ENSMUSG00000039233	ENSMUSG00000035236
ENSMUSG00000039246	ENSMUSG00000035247
ENSMUSG00000039342	ENSMUSG00000035297
ENSMUSG00000039354	ENSMUSG00000035726
ENSMUSG00000039391	ENSMUSG00000035735
ENSMUSG00000039480	ENSMUSG00000035765
ENSMUSG00000039531	ENSMUSG00000036270
ENSMUSG00000039552	ENSMUSG00000036323
ENSMUSG00000039616	ENSMUSG00000036333
ENSMUSG00000039740	ENSMUSG00000036450
ENSMUSG00000039763	ENSMUSG00000036534
ENSMUSG00000039783	ENSMUSG00000036550
ENSMUSG00000039887	ENSMUSG00000036613
ENSMUSG00000039958	ENSMUSG00000036636
ENSMUSG00000039988	ENSMUSG00000036934
ENSMUSG00000040044	ENSMUSG00000036940
ENSMUSG00000040112	ENSMUSG00000036977
ENSMUSG00000040124	ENSMUSG00000036980
ENSMUSG00000040269	ENSMUSG00000037119
ENSMUSG00000040282	ENSMUSG00000037149
ENSMUSG00000040473	ENSMUSG00000037172
ENSMUSG00000040514	ENSMUSG00000037214
ENSMUSG00000040525	ENSMUSG00000037287
ENSMUSG00000040532	ENSMUSG00000037343
ENSMUSG00000040812	ENSMUSG00000037364
ENSMUSG00000040820	ENSMUSG00000037461
ENSMUSG00000040822	ENSMUSG00000037487
ENSMUSG00000041079	ENSMUSG00000037622
ENSMUSG00000041138	ENSMUSG00000037720
ENSMUSG00000041343	ENSMUSG00000037916
ENSMUSG00000041377	ENSMUSG00000037993
ENSMUSG00000041396	ENSMUSG00000038084
ENSMUSG00000041426	ENSMUSG00000038095
ENSMUSG00000041439	ENSMUSG00000038160
ENSMUSG00000041479	ENSMUSG00000038175
ENSMUSG00000041491	ENSMUSG00000038193
ENSMUSG00000041733	ENSMUSG00000038372
ENSMUSG00000041740	ENSMUSG00000038383
ENSMUSG00000042073	ENSMUSG00000038416
ENSMUSG00000042148	ENSMUSG00000038446
ENSMUSG00000042198	ENSMUSG00000038564
ENSMUSG00000042208	ENSMUSG00000038582
ENSMUSG00000042210	ENSMUSG00000038622
ENSMUSG00000042251	ENSMUSG00000038628
ENSMUSG00000042298	ENSMUSG00000038695
ENSMUSG00000042444	ENSMUSG00000038696
ENSMUSG00000042505	ENSMUSG00000038733
ENSMUSG00000042742	ENSMUSG00000038822
ENSMUSG00000042751	ENSMUSG00000038861
ENSMUSG00000043153	ENSMUSG00000038957
ENSMUSG00000043252	ENSMUSG00000039016
ENSMUSG00000043510	ENSMUSG00000039067
ENSMUSG00000043572	ENSMUSG00000039148
ENSMUSG00000044026	ENSMUSG00000039157
ENSMUSG00000044056	ENSMUSG00000039178
ENSMUSG00000044350	ENSMUSG00000039202
ENSMUSG00000044835	ENSMUSG00000039220
ENSMUSG00000045107	ENSMUSG00000039263
ENSMUSG00000045140	ENSMUSG00000039382
ENSMUSG00000045176	ENSMUSG00000039449
ENSMUSG00000045624	ENSMUSG00000039463
ENSMUSG00000045625	ENSMUSG00000039515
ENSMUSG00000046152	ENSMUSG00000039615
ENSMUSG00000046186	ENSMUSG00000039662
ENSMUSG00000046192	ENSMUSG00000039686
ENSMUSG00000046753	ENSMUSG00000039714
ENSMUSG00000046782	ENSMUSG00000039768
ENSMUSG00000046886	ENSMUSG00000039849
ENSMUSG00000046947	ENSMUSG00000039879
ENSMUSG00000047021	ENSMUSG00000040009
ENSMUSG00000047045	ENSMUSG00000040383
ENSMUSG00000047115	ENSMUSG00000040396
ENSMUSG00000047394	ENSMUSG00000040606
ENSMUSG00000047656	ENSMUSG00000040725
ENSMUSG00000047804	ENSMUSG00000040738
ENSMUSG00000047940	ENSMUSG00000040794
ENSMUSG00000048029	ENSMUSG00000040843
ENSMUSG00000048439	ENSMUSG00000040997
ENSMUSG00000048520	ENSMUSG00000041120
ENSMUSG00000048677	ENSMUSG00000041236
ENSMUSG00000048755	ENSMUSG00000041319
ENSMUSG00000049285	ENSMUSG00000041355
ENSMUSG00000049287	ENSMUSG00000041638
ENSMUSG00000049439	ENSMUSG00000041763
ENSMUSG00000049670	ENSMUSG00000041879
ENSMUSG00000049904	ENSMUSG00000042215
ENSMUSG00000049971	ENSMUSG00000042303
ENSMUSG00000050002	ENSMUSG00000042323
ENSMUSG00000050103	ENSMUSG00000042350
ENSMUSG00000050244	ENSMUSG00000042447
ENSMUSG00000050323	ENSMUSG00000042453
ENSMUSG00000050973	ENSMUSG00000042535
ENSMUSG00000051154	ENSMUSG00000042596
ENSMUSG00000051235	ENSMUSG00000042650
ENSMUSG00000051557	ENSMUSG00000042707
ENSMUSG00000052253	ENSMUSG00000043241
ENSMUSG00000052337	ENSMUSG00000043411
ENSMUSG00000052395	ENSMUSG00000043940
ENSMUSG00000052406	ENSMUSG00000044629
ENSMUSG00000052955	ENSMUSG00000045039
ENSMUSG00000052962	ENSMUSG00000045435
ENSMUSG00000053333	ENSMUSG00000045482
ENSMUSG00000053898	ENSMUSG00000045503
ENSMUSG00000054079	ENSMUSG00000046312
ENSMUSG00000054362	ENSMUSG00000046314
ENSMUSG00000054474	ENSMUSG00000046844
ENSMUSG00000054484	ENSMUSG00000047260
ENSMUSG00000054836	ENSMUSG00000047344
ENSMUSG00000055114	ENSMUSG00000047379
ENSMUSG00000055137	ENSMUSG00000047434
ENSMUSG00000055660	ENSMUSG00000047843
ENSMUSG00000055809	ENSMUSG00000047866
ENSMUSG00000055850	ENSMUSG00000047921
ENSMUSG00000056215	ENSMUSG00000048170
ENSMUSG00000056666	ENSMUSG00000048578
ENSMUSG00000056698	ENSMUSG00000048920
ENSMUSG00000057110	ENSMUSG00000049288
ENSMUSG00000057176	ENSMUSG00000049303
ENSMUSG00000057228	ENSMUSG00000049969
ENSMUSG00000057234	ENSMUSG00000050132
ENSMUSG00000058006	ENSMUSG00000050144
ENSMUSG00000058267	ENSMUSG00000050552
ENSMUSG00000058351	ENSMUSG00000051703
ENSMUSG00000058440	ENSMUSG00000052428
ENSMUSG00000059022	ENSMUSG00000052456
ENSMUSG00000059183	ENSMUSG00000052488
ENSMUSG00000059363	ENSMUSG00000052752
ENSMUSG00000059436	ENSMUSG00000052981
ENSMUSG00000059854	ENSMUSG00000053565
ENSMUSG00000060090	ENSMUSG00000053774
ENSMUSG00000060268	ENSMUSG00000054309
ENSMUSG00000060679	ENSMUSG00000054405
ENSMUSG00000060798	ENSMUSG00000054414
ENSMUSG00000061171	ENSMUSG00000056167
ENSMUSG00000061298	ENSMUSG00000056220
ENSMUSG00000061882	ENSMUSG00000056305
ENSMUSG00000062031	ENSMUSG00000056342
ENSMUSG00000062110	ENSMUSG00000056832
ENSMUSG00000062526	ENSMUSG00000058729
ENSMUSG00000062729	ENSMUSG00000059039
ENSMUSG00000063235	ENSMUSG00000059246
ENSMUSG00000063362	ENSMUSG00000059263
ENSMUSG00000063884	ENSMUSG00000059355
ENSMUSG00000064202	ENSMUSG00000059518
ENSMUSG00000064280	ENSMUSG00000059714
ENSMUSG00000064307	ENSMUSG00000059734
ENSMUSG00000066150	ENSMUSG00000060568
ENSMUSG00000066151	ENSMUSG00000061028
ENSMUSG00000066152	ENSMUSG00000061244
ENSMUSG00000066510	ENSMUSG00000061360
ENSMUSG00000066839	ENSMUSG00000061458
ENSMUSG00000067873	ENSMUSG00000062202
ENSMUSG00000068250	ENSMUSG00000062352
ENSMUSG00000068290	ENSMUSG00000062372
ENSMUSG00000068328	ENSMUSG00000062963
ENSMUSG00000068391	ENSMUSG00000063145
ENSMUSG00000068921	ENSMUSG00000063439
ENSMUSG00000068922	ENSMUSG00000063511
ENSMUSG00000069835	ENSMUSG00000063576
ENSMUSG00000070306	ENSMUSG00000063802
ENSMUSG00000070394	ENSMUSG00000064127
ENSMUSG00000070806	ENSMUSG00000066036
ENSMUSG00000070883	ENSMUSG00000066042
ENSMUSG00000070953	ENSMUSG00000066148
ENSMUSG00000071037	ENSMUSG00000066735
ENSMUSG00000071103	ENSMUSG00000066900
ENSMUSG00000071398	ENSMUSG00000066979
ENSMUSG00000072623	ENSMUSG00000067148
ENSMUSG00000073016	ENSMUSG00000067787
ENSMUSG00000073077	ENSMUSG00000068036
ENSMUSG00000073434	ENSMUSG00000068040
ENSMUSG00000073633	ENSMUSG00000069072
ENSMUSG00000073791	ENSMUSG00000070284
ENSMUSG00000073792	ENSMUSG00000070319
ENSMUSG00000073856	ENSMUSG00000071073
ENSMUSG00000074591	ENSMUSG00000071074
ENSMUSG00000074676	ENSMUSG00000071662
ENSMUSG00000074890	ENSMUSG00000071856
ENSMUSG00000075043	ENSMUSG00000074247
ENSMUSG00000075703	ENSMUSG00000074922

## Sheet: EST_libraries
EST_Library_ID	EST_Library_Name	BGEE_stage_ID	total_EST_Count_in_BGEE
431	Soares mouse p3NMF19.5	XUO:0000071	12220
441	Mouse Bruce 4 cell line	XUO:0000046	2
460	Mouse notochord 9.5 d.p.c.	XUO:0000059	2
509	Stratagene mouse heart (#937316)	XUO:0000065	4656
528	Life Tech mouse embryo 10 5dpc 10665016	XUO:0000061	560
529	Life Tech mouse embryo 15 5dpc 10667012	XUO:0000067	636
532	Life Tech mouse embryo 13 5dpc 10666014	XUO:0000065	1834
538	Life Tech mouse embryo 8 5dpc 10664019	XUO:0000057	1076
547	Beddington mouse embryonic region	XUO:0000055	4332
592	GuayWoodford Beier mouse kidney day 0	XUO:0000071	818
593	Soares mouse 3NME12 5	XUO:0000064	5709
844	Knowles Solter mouse 7 5dpc primitive streak	XUO:0000055	32
845	Ko mouse embryo 11 5dpc	XUO:0000063	1523
856	Mouse 7.5 dpc embryo ectoplacental cone cDNA library	XUO:0000055	1684
862	Knowles Solter mouse 2 cell	XUO:0000046	6917
867	Knowles Solter mouse unfertilized egg	XUO:0000045	175
871	Knowles Solter mouse 8 cell	XUO:0000047	33
1021	Mouse 3.5-dpc blastocyst cDNA	XUO:0000048	2405
1119	Mouse fertilized one-cell-embryo cDNA	XUO:0000045	1476
1149	Mouse heart ESTs (Cai,T.)	XUO:0000066	2
1298	Sugano mouse embryo mewa	XUO:0000066	5678
1304	Mouse 9.5 dpc embryo	XUO:0000059	9
1381	Mouse eight-cell stage embryo cDNA	XUO:0000047	1549
1382	Mouse two-cell stage embryo cDNA	XUO:0000046	1410
1389	Mouse unfertilized egg cDNA	XUO:0000045	1206
1423	Mouse embryo 8.5 dpc	XUO:0000057	8
1524	Mouse four-cell-embryo cDNA	XUO:0000046	1204
1532	Mouse sixteen-cell-embryo cDNA	XUO:0000047	1345
1557	Rashbass mouse MOC 11 5 optic cup	XUO:0000063	162
1558	Rashbass mouse MOV 9 5 optic vesicle	XUO:0000059	399
1712	Mus musculus skin C57Bl neonatal	XUO:0000071	2
1770	Mus musculus 18-day embryo C57BL/6J	XUO:0000070	6544
1883	Mus musculus liver C57BL/6J 13-day embryo	XUO:0000065	1341
1884	Mus musculus C57BL/6J 10-day embryo	XUO:0000060	4601
1885	Mus musculus C57BL/6J 11-day embryo	XUO:0000062	2757
1904	Mus musculus head C57BL/6J 13-day embryo	XUO:0000065	3015
1906	Mus musculus head C57BL/6J 12-day embryo	XUO:0000064	1664
1909	Mus musculus lower body C57BL/6J 12-day embryo	XUO:0000064	11
1911	Mus musculus liver C57BL/6J 14-day embryo	XUO:0000066	91
1913	Mus musculus C57BL/6J 8-day embryo	XUO:0000056	891
1964	Mus musculus musculus CKH E12.5	XUO:0000064	1
2381	Beddington mouse dissected endoderm	XUO:0000055	1009
2497	Mus musculus 11.5 d.p.c.	XUO:0000063	11
2514	RIKEN full-length enriched, 12 days embryo head	XUO:0000064	1313
2516	RIKEN full-length enriched, 17 days embryo head	XUO:0000069	1134
2517	RIKEN full-length enriched, 10 days embryo	XUO:0000060	1993
2519	RIKEN full-length enriched, 12 days embryo, body below diaphragm	XUO:0000064	214
2521	RIKEN full-length enriched, 13 days embryo	XUO:0000065	141
2522	RIKEN full-length enriched, 15 days embryo head	XUO:0000067	8234
2523	RIKEN full-length enriched, 16 days embryo head	XUO:0000068	9397
2525	RIKEN full-length enriched, 14 days embryo liver	XUO:0000066	1277
2526	RIKEN full-length enriched, 0 day neonate skin	XUO:0000071	3593
2546	RIKEN full-length enriched, 0 day neonate head	XUO:0000071	5930
2554	RIKEN full-length enriched, 13 days embryo forelimb	XUO:0000065	1640
2555	RIKEN full-length enriched, 13 days embryo male testis	XUO:0000065	4473
2556	RIKEN full-length enriched, 14 days embryo thymus	XUO:0000066	136
2557	RIKEN full-length enriched, 11 days embryo head	XUO:0000062	986
2565	RIKEN full-length enriched, 6 days embryo	XUO:0000052	229
2566	RIKEN full-length enriched, 8 days embryo	XUO:0000056	6655
2574	RIKEN full-length enriched, 10 days neonate cerebellum	XUO:0000060	7306
2575	RIKEN full-length enriched, 12 days embryo female ovary	XUO:0000064	945
2576	RIKEN full-length enriched, 12 days embryo male wolffian duct	XUO:0000064	3268
2577	RIKEN full-length enriched, 12 days embryo female mullerian duct	XUO:0000064	5079
2578	RIKEN full-length enriched, 11 days embryo gonad	XUO:0000062	440
2589	RIKEN full-length enriched, in vitro fertilized eggs	XUO:0000045	9050
2593	RIKEN full-length enriched, 11 days embryo wolffian and mullerian ducts	XUO:0000062	131
2594	RIKEN full-length enriched, 15 days embryo male testis	XUO:0000067	3174
2595	RIKEN full-length enriched, 15 days embryonic body between diaphragm and neck	XUO:0000067	69
2596	RIKEN full-length enriched, 15 days embryonic body below diaphragm	XUO:0000067	128
2598	RIKEN full-length enriched, 16 days embryo lung	XUO:0000068	1362
2599	RIKEN full-length enriched, 11 days embryonic body between diaphragm region and neck	XUO:0000062	99
2600	RIKEN full-length enriched, 14 days embryo female mammary gland	XUO:0000066	79
3721	Mione mouse WTB	XUO:0000065	238
3777	NIA Mouse E7.5 Embryonic Portion cDNA Library	XUO:0000055	978
3778	NIA Mouse E12.5 Female Mesonephros and Gonads cDNA Library	XUO:0000064	1974
3779	NIA Mouse Newborn Ovary cDNA Library	XUO:0000071	3373
4042	E8.5 mouse craniofacial subtraction cDNA library	XUO:0000057	773
4088	Soares_mouse_NMIE	XUO:0000071	1046
4141	RIKEN full-length enriched, 13 days embryo liver	XUO:0000065	2978
4142	RIKEN full-length enriched, 11 days embryo	XUO:0000062	469
4143	RIKEN full-length enriched, 13 days embryo head	XUO:0000065	391
5319	RIKEN full-length enriched, 12 days embryo, embryonic body between diaphragm region and neck	XUO:0000064	9114
5359	RIKEN full-length enriched, 16 days neonate thymus	XUO:0000068	5902
5362	Stratagene lambda ZAP II libraries, Cat number 936309	XUO:0000071	3
5368	RIKEN full-length enriched, 0 day neonate thymus	XUO:0000071	5444
5373	RIKEN full-length enriched, 7 days neonate cerebellum	XUO:0000071	5832
5391	RIKEN full-length enriched, 2 cells egg	XUO:0000046	4711
5392	RIKEN full-length enriched, 9.5 days embryo parthenogenote	XUO:0000059	2632
5402	RIKEN full-length enriched, 6 days neonate medulla oblongata	XUO:0000052	710
5408	RIKEN full-length enriched, 0 day neonate cerebellum	XUO:0000071	7576
5417	Soares_NMEBA_branchial_arch	XUO:0000061	4280
5422	RIKEN full-length enriched, 7 days embryo	XUO:0000054	3690
5423	RIKEN full-length enriched, 12 days embryo spinal cord	XUO:0000064	3521
5431	RIKEN full-length enriched, 18 days embryo	XUO:0000070	235
5432	RIKEN full-length enriched, 9 days embryo	XUO:0000058	5645
5464	RIKEN full-length enriched, 12 days embryo spinal ganglion	XUO:0000064	6741
5465	RIKEN full-length enriched, 12 days embryo eyeball	XUO:0000064	3041
5466	RIKEN full-length enriched, 13 days embryo heart	XUO:0000065	3112
5469	RIKEN full-length enriched, 13 days embryo lung	XUO:0000065	3168
5470	RIKEN full-length enriched, 13 days embryo stomach	XUO:0000065	2391
5492	RIKEN full-length enriched, 0 day neonate kidney	XUO:0000071	3742
5497	RIKEN full-length enriched, 0 day neonate lung	XUO:0000071	3005
5498	RIKEN full-length enriched, 0 day neonate eyeball	XUO:0000071	4292
5662	Mouse e14.5 developing pituitary gland	XUO:0000066	233
6255	NIA Mouse E13.5 VMB Dopamine cell cDNA Library	XUO:0000065	269
6769	NIH_BMAP_Ret1	XUO:0000065	765
6770	NIH_BMAP_Ret1_N	XUO:0000065	524
6771	NIH_BMAP_Ret2	XUO:0000071	570
6772	NIH_BMAP_Ret2_N	XUO:0000071	543
7240	Melton Mouse E16 5 Pancreas Library 2 M16B2	XUO:0000068	3657
7255	Mouse 9-day fetus cDNA library MPMGp559	XUO:0000058	115
7256	Mouse 9-day fetus cDNA library ICRFp522	XUO:0000058	816
7329	Mouse unfertilized-egg cDNA	XUO:0000045	1
8621	NIA Mouse Newborn Kidney cDNA Library2 (Short)	XUO:0000071	605
8638	Melton Mouse E16 5 Pancreas Library M16Z1	XUO:0000068	245
8864	Soares NMBP2 pituitary	XUO:0000066	742
8904	Kaestner ngn3 - -	XUO:0000066	1890
8905	Kaestner ngn3 wt	XUO:0000066	5485
8907	Mouse E14.5 retina lambda ZAP II Library	XUO:0000066	13252
9844	RIKEN full-length enriched, 14 days embryo eyeball	XUO:0000066	116
9845	RIKEN full-length enriched, 8 cells embryo	XUO:0000047	4807
9847	RIKEN full-length enriched, 6 days neonate spleen	XUO:0000052	8495
9950	RIKEN full-length enriched, 16 days neonate male diencephalon	XUO:0000068	1656
9951	RIKEN full-length enriched, 16 days neonate male medulla oblongata	XUO:0000068	589
9953	RIKEN full-length enriched, 14 days embryo lung	XUO:0000066	613
9956	RIKEN full-length enriched, 15 days embryo brain	XUO:0000067	659
9978	NIA Mouse Newborn Brain cDNA Library	XUO:0000071	2187
9979	NIA Mouse Newborn Kidney cDNA Library (Long)	XUO:0000071	4347
9980	NIA Mouse Newborn Heart cDNA Library	XUO:0000071	1793
10024	NIA Mouse Trophoblast Stem Cell cDNA Library (Long)	XUO:0000048	4066
10025	NIA Mouse Trophoblast Stem Cell cDNA Library (Short)	XUO:0000048	650
10026	NIA Mouse Blastocyst cDNA Library (Long)	XUO:0000048	12311
10027	NIA Mouse 12.5-dpc Male Genital Ridge/Mesonephros cDNA Library (Long)	XUO:0000064	1913
10029	NIA Mouse Unfertilized Egg cDNA Library (Long)	XUO:0000045	8364
10036	NIA Mouse 7.5-dpc Whole Embryo cDNA Library (Long)	XUO:0000055	8390
10039	NIA Mouse 8.5-dpc Whole Embryo cDNA Library (Long)	XUO:0000057	5070
10253	Melton Amplified Mouse E16 5 Pancreas 3 M16S1 A	XUO:0000068	1200
10349	Kaestner ngn3 - - subtracted	XUO:0000066	499
10350	Kaestner wt amplified	XUO:0000066	639
10370	NIH_BMAP_EH0	XUO:0000070	624
10371	NIH_BMAP_EG0p	XUO:0000070	1697
10372	NIH_BMAP_EM0	XUO:0000070	2370
10373	NIH_BMAP_EH0p	XUO:0000070	2191
10374	NIH_BMAP_EG0	XUO:0000070	470
10375	NIH_BMAP_EF0	XUO:0000070	466
10389	NIH_BMAP_EQ0	XUO:0000067	1174
10532	NIH_BMAP_EV0	XUO:0000067	2064
10533	NIH_BMAP_EW0	XUO:0000067	2327
10534	NIH_BMAP_EX0	XUO:0000067	2774
10561	Baker mouse embryo e6.5	XUO:0000053	523
10562	Baker mouse embryo e7.5	XUO:0000055	559
10847	NIH_BMAP_FA0	XUO:0000064	702
10920	Mouse Organ of Corti cDNA pBluescript	XUO:0000071	3533
10921	NIH_BMAP_FB0	XUO:0000064	633
10922	NIH_BMAP_FC0	XUO:0000064	4234
10923	NIH_BMAP_FD0	XUO:0000064	4565
10968	NIH_MGC_129	XUO:0000071	5579
11043	NIH_BMAP_FI0	XUO:0000064	5094
11113	AFT024-subtracted library	XUO:0000066	2842
11128	McCarrey Eddy 18 day preleptotene spermatocytes	XUO:0000070	1448
11139	NIH_MGC_130	XUO:0000058	6249
11150	NIH_BMAP_FO0	XUO:0000064	4610
11265	NIH_MGC_139	XUO:0000068	270
11284	McCarrey Eddy 18 day leptotene and zygotene spermatocytes	XUO:0000070	927
11946	Hematopoietic Stem Cell Subtracted Library	XUO:0000066	2815
12231	RIKEN full-length enriched, 5 days embryo whole body	XUO:0000051	692
12242	RIKEN full-length enriched, 3 cells embryo	XUO:0000046	5
12243	RIKEN full-length enriched, 4 cells embryo	XUO:0000046	167
12246	RIKEN full-length enriched, 4 days embryo whole body	XUO:0000049	752
12247	RIKEN full-length enriched, 16 days embryo heart	XUO:0000068	2735
12248	RIKEN full-length enriched, 17 days embryo heart	XUO:0000069	4748
12249	RIKEN full-length enriched, 16 days embryo kidney	XUO:0000068	3515
12250	RIKEN full-length enriched, 17 days embryo kidney	XUO:0000069	4318
12251	RIKEN full-length enriched, 17 days embryo stomach	XUO:0000069	2285
12258	RIKEN full-length enriched, 13 days embryo whole body	XUO:0000065	693
12259	RIKEN full-length enriched, 14 days embryo whole body	XUO:0000066	1083
12260	RIKEN full-length enriched, 16 days embryo whole body	XUO:0000068	1108
12261	RIKEN full-length enriched, 17 days embryo whole body	XUO:0000069	840
12263	RIKEN full-length enriched, pooled tissues, 16 days embryo, etc.	XUO:0000068	3323
12265	RIKEN full-length enriched, 15 days embryo whole body	XUO:0000067	3108
12266	RIKEN full-length enriched, 18 days embryo whole body	XUO:0000070	1820
12267	RIKEN full-length enriched, 17.5 days embryo whole body	XUO:0000069	29843
12303	RIKEN full-length enriched, 14.5 days embryo RP+/+ Rathke's pouches	XUO:0000066	5635
12305	RIKEN full-length enriched, 14.5 days embryo df/df Rathke's pouches	XUO:0000066	4596
12313	RIKEN full-length enriched, 18-day embryo whole body	XUO:0000070	712
12315	RIKEN full-length enriched, 6 days embryo whole body	XUO:0000052	3
12316	RIKEN full-length enriched, 7 days embryo whole body	XUO:0000054	186
12317	RIKEN full-length enriched, 8 days embryo whole body	XUO:0000056	272
12318	RIKEN full-length enriched, 9 days embryo whole body	XUO:0000058	62
12447	12.0-12.5 dpc subtracted mouse testis	XUO:0000064	21
12979	MOUSE EMBRYONIC DAY 15.5 EYE	XUO:0000067	1212
13849	NIA Mouse Embryonic Germ Cell cDNA Library (Long)	XUO:0000056	11416
13850	NIA Mouse E9.5 Whole Embryo cDNA Library (Long)	XUO:0000059	4241
13851	NIA Mouse E6.5 Whole Embryo cDNA Library (Long)	XUO:0000053	3682
14141	NIA Mouse Newborn Kidney cDNA Library (Long 1)	XUO:0000071	2094
14142	NIA Mouse Unfertilized Egg cDNA Library (Long 1)	XUO:0000045	3696
14152	NIH_BMAP_EY0	XUO:0000067	559
14557	NIA Mouse Embryonic Germ Cell cDNA Library (Long, subtracted)	XUO:0000056	2245
14558	NIA Mouse Trophoblast Stem Cell cDNA Library (Long 1)	XUO:0000048	2563
14614	NIH_BMAP_HL0	XUO:0000059	1967
15087	NIA Mouse E12.5 Male Mesonephros/Gonad cDNA Library	XUO:0000064	125
15440	E10.5 olfactory placode OP27 cells	XUO:0000061	10
15702	NIA Mouse E13.5 whole embryo cDNA library (Long)	XUO:0000065	4067
15706	NIA Mouse E10.5 whole embryo cDNA library (Long)	XUO:0000061	4228
15707	NIA Mouse E11.5 whole embryo cDNA library (Long)	XUO:0000063	4429
15708	NIA Mouse eight-cell-Embryo cDNA library (Long)	XUO:0000047	5500
15709	NIA Mouse four-cell-Embryo cDNA library (Long)	XUO:0000046	6262
15745	Mus musculus cerebellum E18-P56	XUO:0000070	702
15753	Mus musculus cerebellum E18-P64	XUO:0000070	1
15756	Mus musculus cerebellum E18-P67	XUO:0000070	1
15760	Mus musculus cerebellum E18-P71	XUO:0000070	1
16670	e7.5	XUO:0000055	9
16671	e6.5	XUO:0000053	15
16788	Embryonic day 10 Mouse Pancreas Amplified cDNA library	XUO:0000060	761
17656	Telencephalic Embryonic Sutractive Sequences	XUO:0000066	400
17903	RIKEN full-length enriched mouse cDNA library, C57BL/6J 1 cell embryo	XUO:0000045	7570
17904	RIKEN full-length enriched mouse cDNA library, C57BL/6J 3 cells embryo 3 cells	XUO:0000046	52
17905	RIKEN full-length enriched mouse cDNA library, C57BL/6J 4 cells embryo 4 cells	XUO:0000046	1517
17906	RIKEN full-length enriched mouse cDNA library, C57BL/6J 8 cells embryo 8 cells	XUO:0000047	353
17913	RIKEN full-length enriched mouse cDNA library, C57BL/6J brain 13 days embryo	XUO:0000065	493
17914	RIKEN full-length enriched mouse cDNA library, C57BL/6J brain 15 days embryo	XUO:0000067	984
17917	RIKEN full-length enriched mouse cDNA library, C57BL/6J cerebellum 0 day neonate	XUO:0000071	307
17919	RIKEN full-length enriched mouse cDNA library, C57BL/6J cerebellum 10 days neonate	XUO:0000060	374
17927	RIKEN full-length enriched mouse cDNA library, C57BL/6J cortex 0 day neonate	XUO:0000071	650
17928	RIKEN full-length enriched mouse cDNA library, C57BL/6J cortex 10 days neonate	XUO:0000071	421
17932	RIKEN full-length enriched mouse cDNA library, C57BL/6J egg 2 cells	XUO:0000046	255
17933	RIKEN full-length enriched mouse cDNA library, C57BL/6J embryonic body below diaphragm 15 days embryo	XUO:0000067	3
17937	RIKEN full-length enriched mouse cDNA library, C57BL/6J embryonic body between diaphragm region and neck, 12 days embryo	XUO:0000064	739
17939	RIKEN full-length enriched mouse cDNA library, C57BL/6J eyeball 0 day neonate	XUO:0000071	295
17940	RIKEN full-length enriched mouse cDNA library, C57BL/6J eyeball 12 days embryo	XUO:0000064	103
17941	RIKEN full-length enriched mouse cDNA library, C57BL/6J eyeball 14 days embryo	XUO:0000066	7
17943	RIKEN full-length enriched mouse cDNA library, C57BL/6J forelimb 13 days embryo	XUO:0000065	218
17945	RIKEN full-length enriched mouse cDNA library, C57BL/6J gonad 11 days embryo	XUO:0000062	19
17946	RIKEN full-length enriched mouse cDNA library, C57BL/6J head 0 day neonate	XUO:0000071	363
17947	RIKEN full-length enriched mouse cDNA library, C57BL/6J head 10 days neonate	XUO:0000071	12
17949	RIKEN full-length enriched mouse cDNA library, C57BL/6J head 12 days embryo	XUO:0000064	43
17950	RIKEN full-length enriched mouse cDNA library, C57BL/6J head 13 days embryo	XUO:0000065	54
17951	RIKEN full-length enriched mouse cDNA library, C57BL/6J head 15 days embryo	XUO:0000067	573
17952	RIKEN full-length enriched mouse cDNA library, C57BL/6J head 16 days embryo	XUO:0000068	372
17956	RIKEN full-length enriched mouse cDNA library, C57BL/6J heart 13 days embryo	XUO:0000065	105
17960	RIKEN full-length enriched mouse cDNA library, C57BL/6J in vitro fertilized eggs	XUO:0000045	626
17964	RIKEN full-length enriched mouse cDNA library, C57BL/6J kidney 0 day neonate	XUO:0000071	137
17966	RIKEN full-length enriched mouse cDNA library, C57BL/6J liver 13 days embryo	XUO:0000065	253
17967	RIKEN full-length enriched mouse cDNA library, C57BL/6J liver 14 days embryo	XUO:0000066	562
17968	RIKEN full-length enriched mouse cDNA library, C57BL/6J lung 0 day neonate	XUO:0000071	70
17969	RIKEN full-length enriched mouse cDNA library, C57BL/6J lung 13 days embryo	XUO:0000065	99
17970	RIKEN full-length enriched mouse cDNA library, C57BL/6J lung 14 days embryo	XUO:0000066	29
17971	RIKEN full-length enriched mouse cDNA library, C57BL/6J lung 16 days embryo	XUO:0000068	105
17974	RIKEN full-length enriched mouse cDNA library, C57BL/6J mammary gland female 14 days embryo	XUO:0000066	5
17977	RIKEN full-length enriched mouse cDNA library, C57BL/6J medulla oblongata male 16 days neonate	XUO:0000071	26
17979	RIKEN full-length enriched mouse cDNA library, C57BL/6J mullerian duct includes surrounding region female 12 days embryo	XUO:0000064	457
17985	RIKEN full-length enriched mouse cDNA library, C57BL/6J ovary female 12 days embryo	XUO:0000064	123
17992	RIKEN full-length enriched mouse cDNA library, C57BL/6J skin 0 day neonate	XUO:0000071	288
17996	RIKEN full-length enriched mouse cDNA library, C57BL/6J spinal cord 11 days embryo	XUO:0000062	735
18000	RIKEN full-length enriched mouse cDNA library, C57BL/6J spinal ganglion 12 days embryo	XUO:0000064	251
18002	RIKEN full-length enriched mouse cDNA library, C57BL/6J stomach 13 days embryo	XUO:0000065	162
18004	RIKEN full-length enriched mouse cDNA library, C57BL/6J testis male 13 days embryo	XUO:0000065	548
18005	RIKEN full-length enriched mouse cDNA library, C57BL/6J testis male 15 days embryo	XUO:0000067	253
18006	RIKEN full-length enriched mouse cDNA library, C57BL/6J testis male 8 days neonate	XUO:0000056	16
18008	RIKEN full-length enriched mouse cDNA library, C57BL/6J thymus 0 day neonate	XUO:0000071	597
18009	RIKEN full-length enriched mouse cDNA library, C57BL/6J thymus 14 days embryo	XUO:0000066	3
18017	RIKEN full-length enriched mouse cDNA library, C57BL/6J whole body 10 days embryo	XUO:0000060	132
18018	RIKEN full-length enriched mouse cDNA library, C57BL/6J whole body 11 days embryo	XUO:0000062	1717
18019	RIKEN full-length enriched mouse cDNA library, C57BL/6J whole body 12 days embryo	XUO:0000064	3104
18020	RIKEN full-length enriched mouse cDNA library, C57BL/6J whole body 13 days embryo	XUO:0000065	37
18021	RIKEN full-length enriched mouse cDNA library, C57BL/6J whole body 4 days embryo	XUO:0000049	1303
18022	RIKEN full-length enriched mouse cDNA library, C57BL/6J whole body 5 days embryo	XUO:0000051	6242
18024	RIKEN full-length enriched mouse cDNA library, C57BL/6J whole body 7 days embryo	XUO:0000054	166
18025	RIKEN full-length enriched mouse cDNA library, C57BL/6J whole body 8 days embryo	XUO:0000056	190
18026	RIKEN full-length enriched mouse cDNA library, C57BL/6J whole body 9 days embryo	XUO:0000058	203
18029	RIKEN full-length enriched mouse cDNA library, C57BL/6J whole body morula	XUO:0000047	4867
18030	RIKEN full-length enriched mouse cDNA library, C57BL/6J wolffian duct and mullerian duct 11 days embryo	XUO:0000062	2
18031	RIKEN full-length enriched mouse cDNA library, C57BL/6J wolffian duct includes surrounding region male 12 days embryo	XUO:0000064	420
18065	RIKEN full-length enriched mouse cDNA library, C57BL/6J brain 14 days embryo	XUO:0000066	422
18068	RIKEN full-length enriched mouse cDNA library, C57BL/6J heart 17 days embryo	XUO:0000069	399
18070	RIKEN full-length enriched mouse cDNA library, C57BL/6J kidney 16 days embryo	XUO:0000068	375
18071	RIKEN full-length enriched mouse cDNA library, C57BL/6J kidney 17 days embryo	XUO:0000069	425
18072	RIKEN full-length enriched mouse cDNA library, C57BL/6J liver 15 days embryo	XUO:0000067	356
18081	RIKEN full-length enriched mouse cDNA library, C57BL/6J stomach 17 days embryo	XUO:0000061	194
18083	RIKEN full-length enriched mouse cDNA library, C57BL/6J whole body 14 days embryo	XUO:0000066	433
18084	RIKEN full-length enriched mouse cDNA library, C57BL/6J whole body 15 days embryo	XUO:0000067	522
18085	RIKEN full-length enriched mouse cDNA library, C57BL/6J whole body 16 days embryo	XUO:0000068	668
18086	RIKEN full-length enriched mouse cDNA library, C57BL/6J whole body 17 days embryo	XUO:0000069	91
18087	RIKEN full-length enriched mouse cDNA library, C57BL/6J whole body 17.5 days embryo	XUO:0000069	906
18088	RIKEN full-length enriched mouse cDNA library, C57BL/6J whole body 18 days embryo	XUO:0000070	20
18100	RIKEN full-length enriched mouse cDNA library, C57BL/6J parthenogenote 9.5 days embryo	XUO:0000059	228
18109	RIKEN full-length enriched mouse cDNA library, CD-1 Rathke's pouches 12.5 days embryo	XUO:0000064	5317
18113	RIKEN full-length enriched mouse cDNA library, Rathke's pouches 14.5 days embryo	XUO:0000066	27685
18147	FH NEONATAL	XUO:0000071	2112
18269	RIKEN full-length enriched mouse cDNA library, C57BL/6J 10 days embryo	XUO:0000060	98
18271	RIKEN full-length enriched mouse cDNA library, C57BL/6J 11 days embryo	XUO:0000062	36
18272	RIKEN full-length enriched mouse cDNA library, C57BL/6J 7 days embryo	XUO:0000054	152
18282	RIKEN full-length enriched mouse cDNA library, C57BL/6J 13 days embryo	XUO:0000065	3
18283	RIKEN full-length enriched mouse cDNA library, C57BL/6J 18 days embryo	XUO:0000070	20
18284	RIKEN full-length enriched mouse cDNA library, C57BL/6J 6 days embryo	XUO:0000052	2
18285	RIKEN full-length enriched mouse cDNA library, C57BL/6J 8 days embryo	XUO:0000056	397
18287	RIKEN full-length enriched mouse cDNA library, C57BL/6J pancreas male 10 day old	XUO:0000060	830
Total	297 Libraries	26 stages	633307

## Sheet: num_genes_expressed_EST
Theiler stage	BGEE stage id	Days post conception	Description	Number of orthologs of FSGD duplicates expressed	Number of orthologs of FSGD singletons expressed	Number of 2R duplicates expressed	Number of 2R singletons expressed	Number of Lethal genes expressed	Number of Abnormal genes expressed	Number of Normal genes expressed	Number of singletons with 25% highest dN/dS	Number of singletons with 25% lowest dN/dS	Total number of genes expressed
1	XUO:0000045	0	One-cell egg	130	1494	536	683	19	281	31	119	214	3775
2	XUO:0000046	1	Dividing egg	152	1724	608	794	25	322	36	122	241	4445
3	XUO:0000047	2	Morula	116	1204	417	640	22	195	20	88	206	3018
4	XUO:0000048	3	Blastocyst (ICM apparent)	130	1264	463	628	22	228	23	91	207	3144
5	XUO:0000049	4	Blastocyst (zona-free)	14	255	75	115	4	63	5	12	48	628
7	XUO:0000051	5	Implantation and formation of egg cylinder	37	584	187	313	7	84	9	44	108	1359
8	XUO:0000052	6	Differentiation of egg cylinder	124	1159	442	576	16	307	27	107	176	3132
9	XUO:0000053	6.5	Advanced endometrial reaction	80	854	269	451	10	125	15	65	164	2047
10	XUO:0000054	7	Amnion	74	870	278	440	8	133	19	62	129	1935
11	XUO:0000055	7.5	Neural plate, presomite stage	136	1517	511	752	25	231	28	106	244	3639
12	XUO:0000056	8	First somites	150	1833	643	897	25	309	34	152	255	4477
13	XUO:0000057	8.5	Turning of the embryo	76	832	305	397	16	143	16	61	148	2087
14	XUO:0000058	9	Formation and closure of anterior neuropore	177	1736	666	839	24	341	35	130	262	4533
15	XUO:0000059	9.5	Formation of posterior neuropore; forelimb bud	128	1468	529	719	21	269	31	102	219	3662
16	XUO:0000060	10	Closure of posterior neuropore; hind limb bud and tail bud	186	1979	717	908	22	454	46	161	279	5279
17	XUO:0000061	10.5	Deep lens indentation	154	1462	518	705	20	284	26	102	211	3760
18	XUO:0000062	11	Closure of lens vesicle	74	1110	362	505	12	189	19	78	162	2680
19	XUO:0000063	11.5	Lens vesicle completely separated from surface	106	947	379	441	14	196	17	66	160	2595
20	XUO:0000064	12	Earliest signs of fingers	332	3081	1158	1361	35	794	71	268	383	8520
21	XUO:0000065	13	Anterior footplate indented	294	2786	1006	1245	33	682	58	227	348	7388
22	XUO:0000066	14	Fingers separate distally	320	2992	1101	1326	32	769	67	250	373	8208
23	XUO:0000067	15	Toes separate	276	2346	954	1010	32	586	55	168	310	6443
24	XUO:0000068	16	Reposition of umbilical hernia	272	2597	1004	1129	30	681	65	215	320	7090
25	XUO:0000069	17	Skin wrinkled	219	2212	794	988	21	539	55	179	272	5691
26	XUO:0000070	18	Long whiskers	223	2063	769	949	23	497	51	167	279	5627
27	XUO:0000071	19	Newborn mouse	384	3438	1313	1456	39	1063	97	295	385	10174
			Number of genes considered	755	6843	2448	2705	50	1939	164	607	607	27766

[truncated: 1 more sheets: regressions]
