# Supplementary material for: Developmental Constraints on Vertebrate Genome Evolution
Source: PubMed Central journal article supplement (PMC2600815; doi:10.1371/journal.pgen.1000311), 2008-12-19
Supplement: pgen.1000311.s006.pdf [file pgen.1000311.s006.pdf]

| Group            | Ontology              | Direction  | GO ID                   | Term                                                           | Annotated  | Significant                                          | Expected | p-value     | adjusted p-value (FDR) |          |          |
|------------------|-----------------------|------------|-------------------------|----------------------------------------------------------------|------------|------------------------------------------------------|----------|-------------|------------------------|----------|----------|
| Early expression | MF                    | Enriched   | GO:0008026              | ATP-dependent helicase activity                                | 32         | 19                                                   | 9.07     | 0.00023     | 0.08671                |          |          |
|                  |                       |            | GO:0003899              | DNA-directed RNA polymerase activity                           | 18         | 12                                                   | 5.1      | 0.0008      | 0.1046175              |          |          |
|                  |                       |            | GO:0004926              | non-G-protein coupled 7TM receptor activity                    | 8          | 7                                                    | 2.27     | 0.00087     | 0.1046175              |          |          |
|                  |                       |            | GO:0008270              | zinc ion binding                                               | 519        | 178                                                  | 147.04   | 0.00111     | 0.1046175              |          |          |
|                  |                       |            | GO:0003702              | RNA polymerase II transcription factor activity                | 19         | 12                                                   | 5.38     | 0.00161     | 0.121394               |          |          |
|                  |                       | Depleted   | GO:0001584              | rhodopsin-like receptor activity                               | 73         | 4                                                    | 20.68    | 7.50E-07    | 0.00028275             |          |          |
|                  |                       |            | GO:0005509              | calcium ion binding                                            | 189        | 32                                                   | 53.55    | 0.00015     | 0.02639                |          |          |
|                  |                       |            | GO:0005102              | receptor binding                                               | 105        | 8                                                    | 29.75    | 0.00021     | 0.02639                |          |          |
|                  |                       |            | GO:0005262              | calcium channel activity                                       | 115        | 17                                                   | 32.58    | 0.00043     | 0.0405275              |          |          |
|                  |                       |            | GO:0019855              | calcium channel inhibitor activity                             | 113        | 17                                                   | 32.02    | 0.00063     | 0.047502               |          |          |
|                  |                       |            | GO:0005198              | structural molecule activity                                   | 187        | 30                                                   | 52.98    | 0.00125     | 0.078541667            |          |          |
|                  |                       |            | GO:0015077              | monovalent inorganic cation transmembrane transporter activity | 54         | 3                                                    | 15.3     | 0.00186     | 0.0970775              |          |          |
|                  |                       |            | GO:0004497              | monooxygenase activity                                         | 54         | 6                                                    | 15.3     | 0.00206     | 0.0970775              |          |          |
|                  |                       |            | GO:0004871              | signal transducer activity                                     | 371        | 68                                                   | 105.11   | 0.00257     | 0.107654444            |          |          |
|                  |                       |            | GO:0008135              | translation factor activity, nucleic acid binding              | 36         | 3                                                    | 10.2     | 0.00336     | 0.126672               |          |          |
|                  |                       |            | GO:0005179              | hormone activity                                               | 35         | 3                                                    | 9.92     | 0.00434     | 0.148743636            |          |          |
|                  |                       |            | GO:0008083              | growth factor activity                                         | 40         | 4                                                    | 11.33    | 0.00476     | 0.149543333            |          |          |
|                  |                       |            | BP                      | Enriched                                                       | GO:0006396 | RNA processing                                       | 61       | 31          | 17.35                  | 0.00017  | 0.12971  |
|                  |                       |            |                         | Depleted                                                       | GO:0007186 | G-protein coupled receptor protein signaling pathway | 103      | 7           | 29.3                   | 3.20E-08 | 2.44E-05 |
|                  |                       |            |                         |                                                                | GO:0006783 | heme biosynthetic process                            | 56       | 4           | 15.93                  | 7.60E-05 | 0.028994 |
| GO:0006816       | calcium ion transport | 118        |                         |                                                                | 17         | 33.56                                                | 0.00022  | 0.055953333 |                        |          |          |
| GO:0006118       | electron transport    | 132        |                         |                                                                | 21         | 37.55                                                | 0.0005   | 0.095375    |                        |          |          |
| Late expression  | MF                    | Enriched   | GO:0005201              | extracellular matrix structural constituent                    | 8          | 8                                                    | 1.09     | 1.10E-07    | 4.15E-05               |          |          |
|                  |                       |            | GO:0005509              | calcium ion binding                                            | 189        | 50                                                   | 25.73    | 1.40E-06    | 0.0002639              |          |          |
|                  |                       |            | GO:0019855              | calcium channel inhibitor activity                             | 113        | 32                                                   | 15.39    | 2.70E-05    | 0.003393               |          |          |
|                  |                       |            | GO:0005262              | calcium channel activity                                       | 115        | 32                                                   | 15.66    | 3.90E-05    | 0.00367575             |          |          |
|                  |                       |            | GO:0019842              | vitamin binding                                                | 20         | 9                                                    | 2.72     | 0.00063     | 0.047502               |          |          |
|                  | Depleted              | GO:0003676 | nucleic acid binding    | 1043                                                           | 107        | 142.01                                               | 0.00021  | 0.07917     |                        |          |          |
|                  | BP                    | Enriched   | GO:0006816              | calcium ion transport                                          | 118        | 33                                                   | 15.94    | 2.20E-05    | 0.0087745              |          |          |
|                  |                       |            | GO:0006096              | glycolysis                                                     | 32         | 16                                                   | 4.32     | 2.30E-05    | 0.0087745              |          |          |
|                  |                       |            | GO:0030574              | collagen catabolic process                                     | 19         | 10                                                   | 2.57     | 5.60E-05    | 0.014242667            |          |          |
|                  |                       |            | GO:0030239              | myofibril assembly                                             | 9          | 6                                                    | 1.22     | 0.00035     | 0.0667625              |          |          |
| GO:0009310       |                       |            | amine catabolic process | 10                                                             | 6          | 1.35                                                 | 7.70E-04 | 0.117502    |                        |          |          |
